# Supplementary material for: Effectiveness of Journal Ranking Schemes as a Tool for Locating Information
Source: PLOS journal article supplement (doi:10.1371/journal.pone.0001683), 2008-02-26

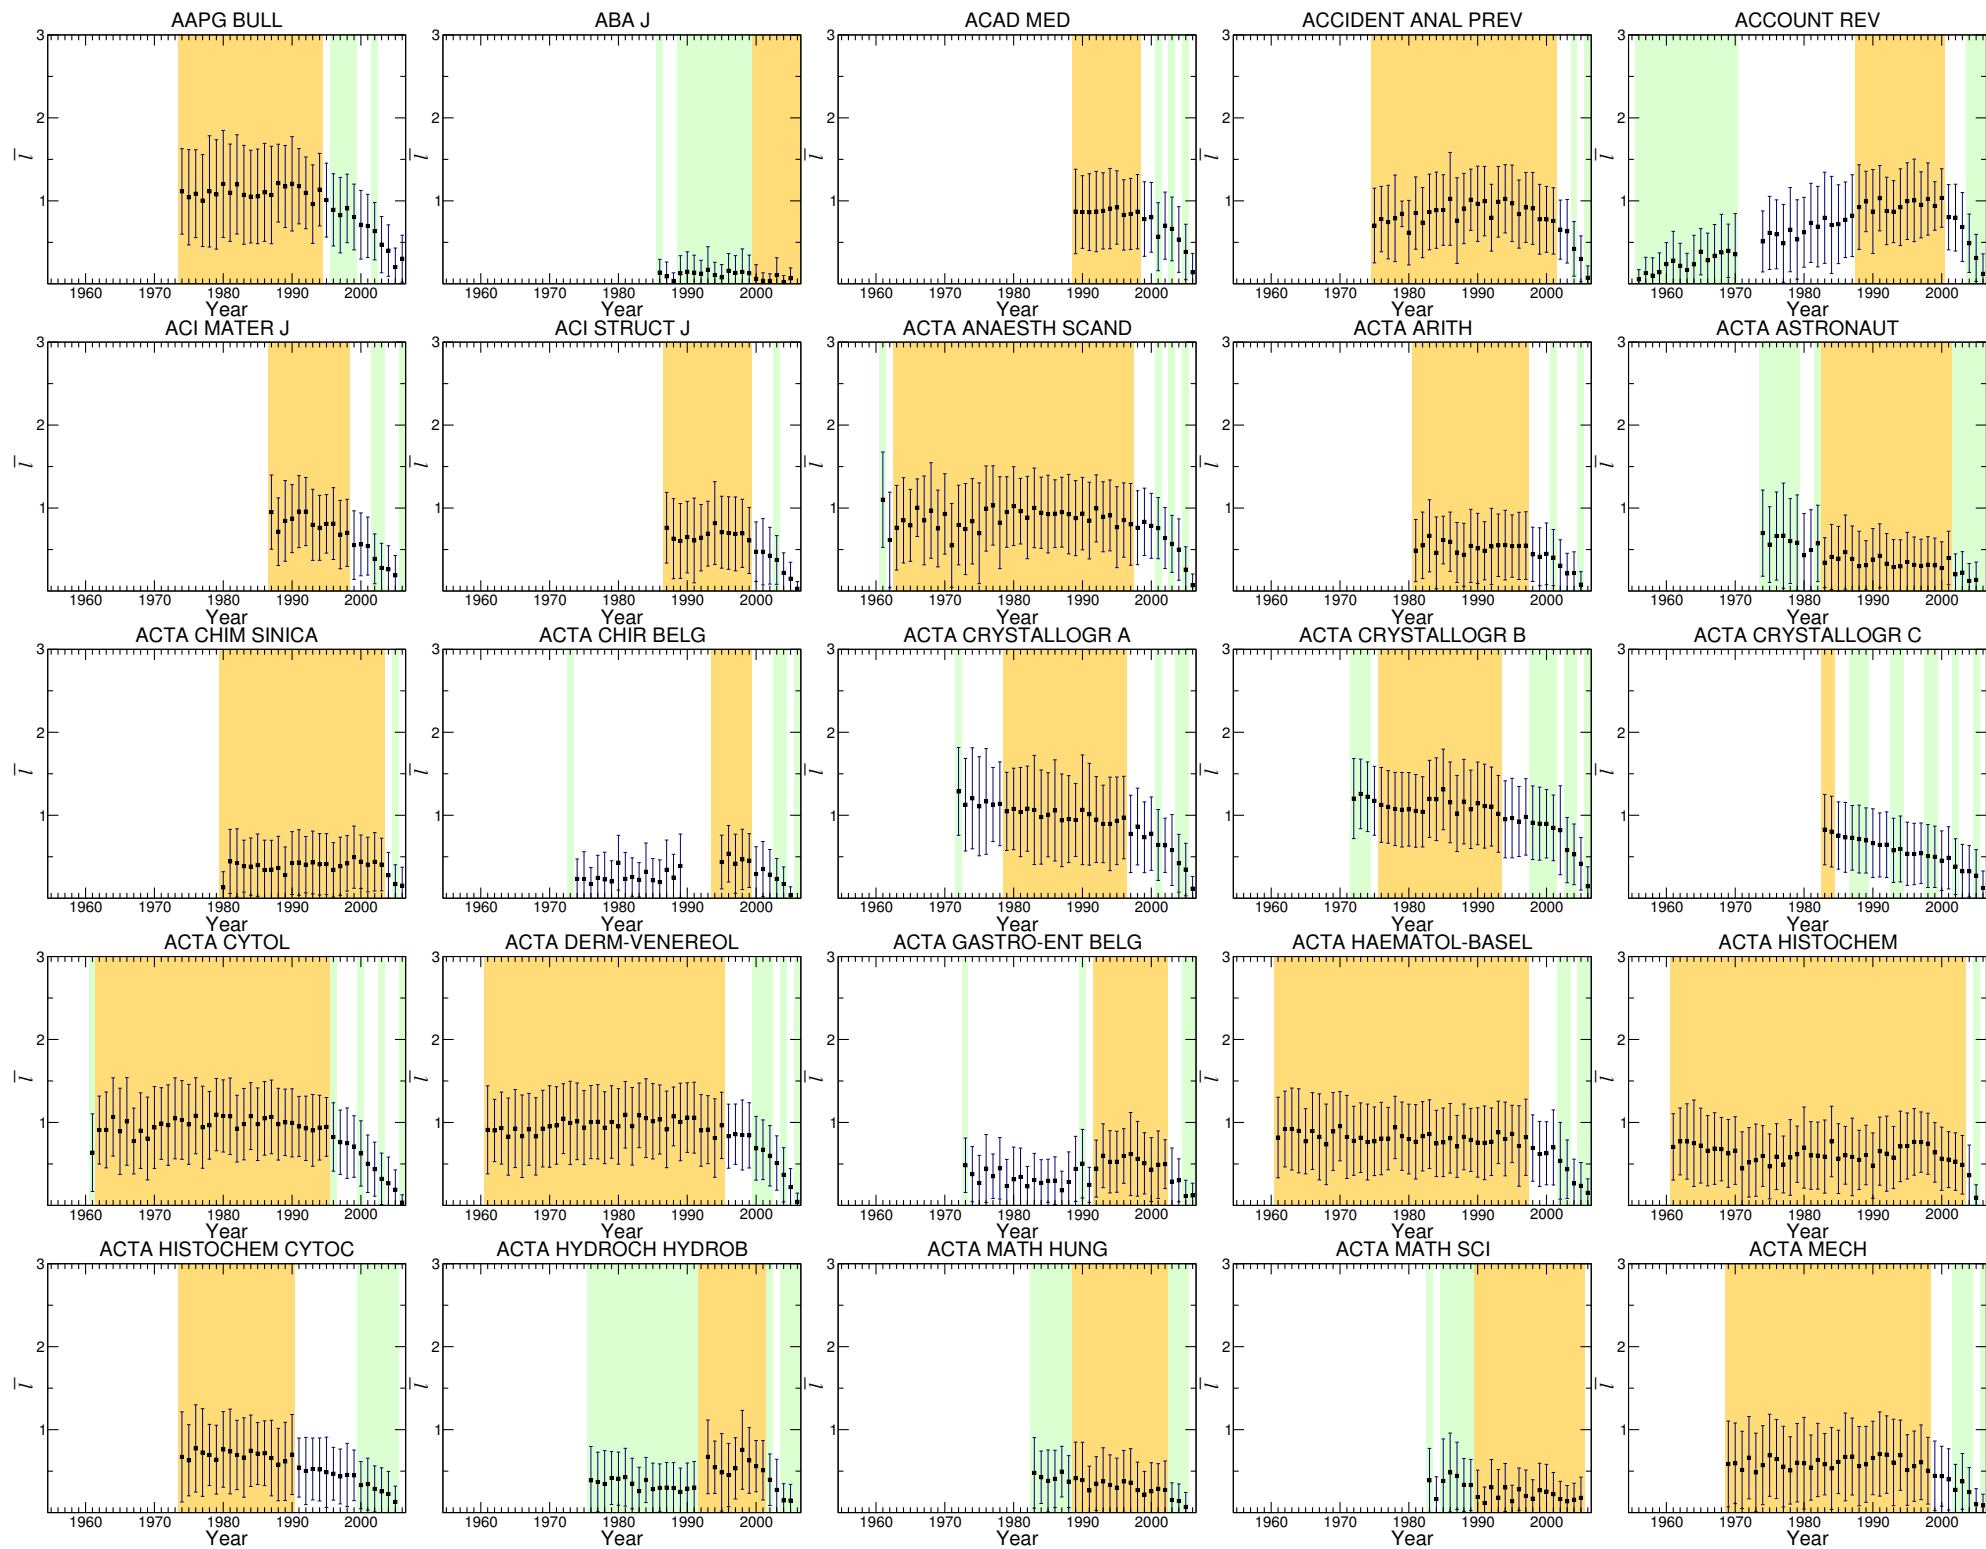

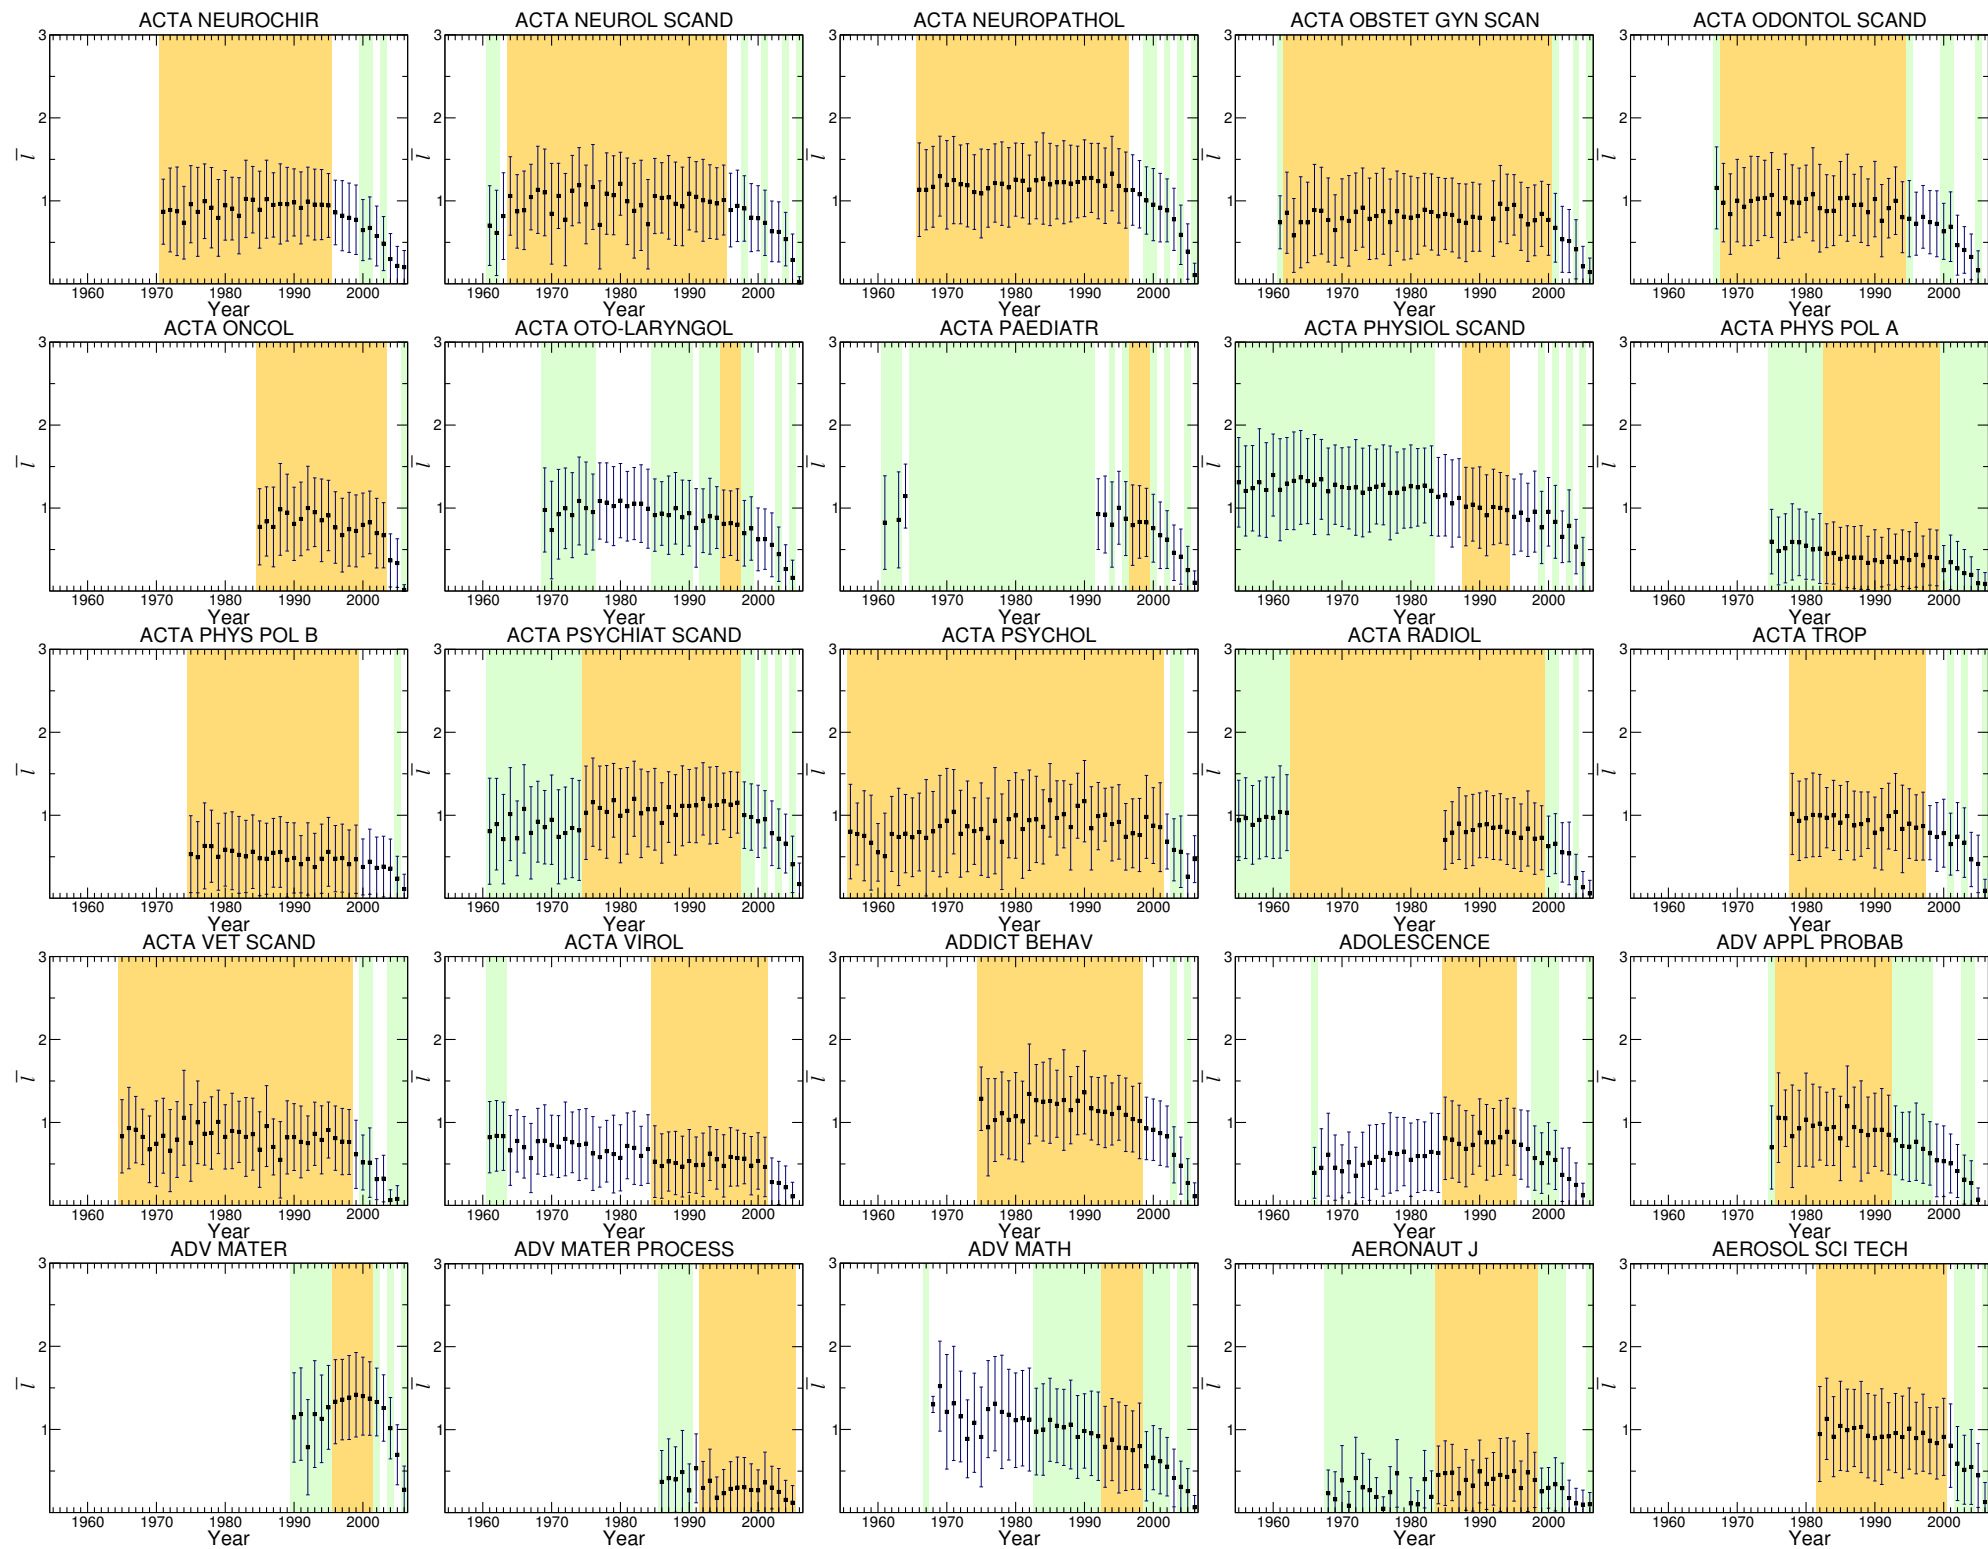

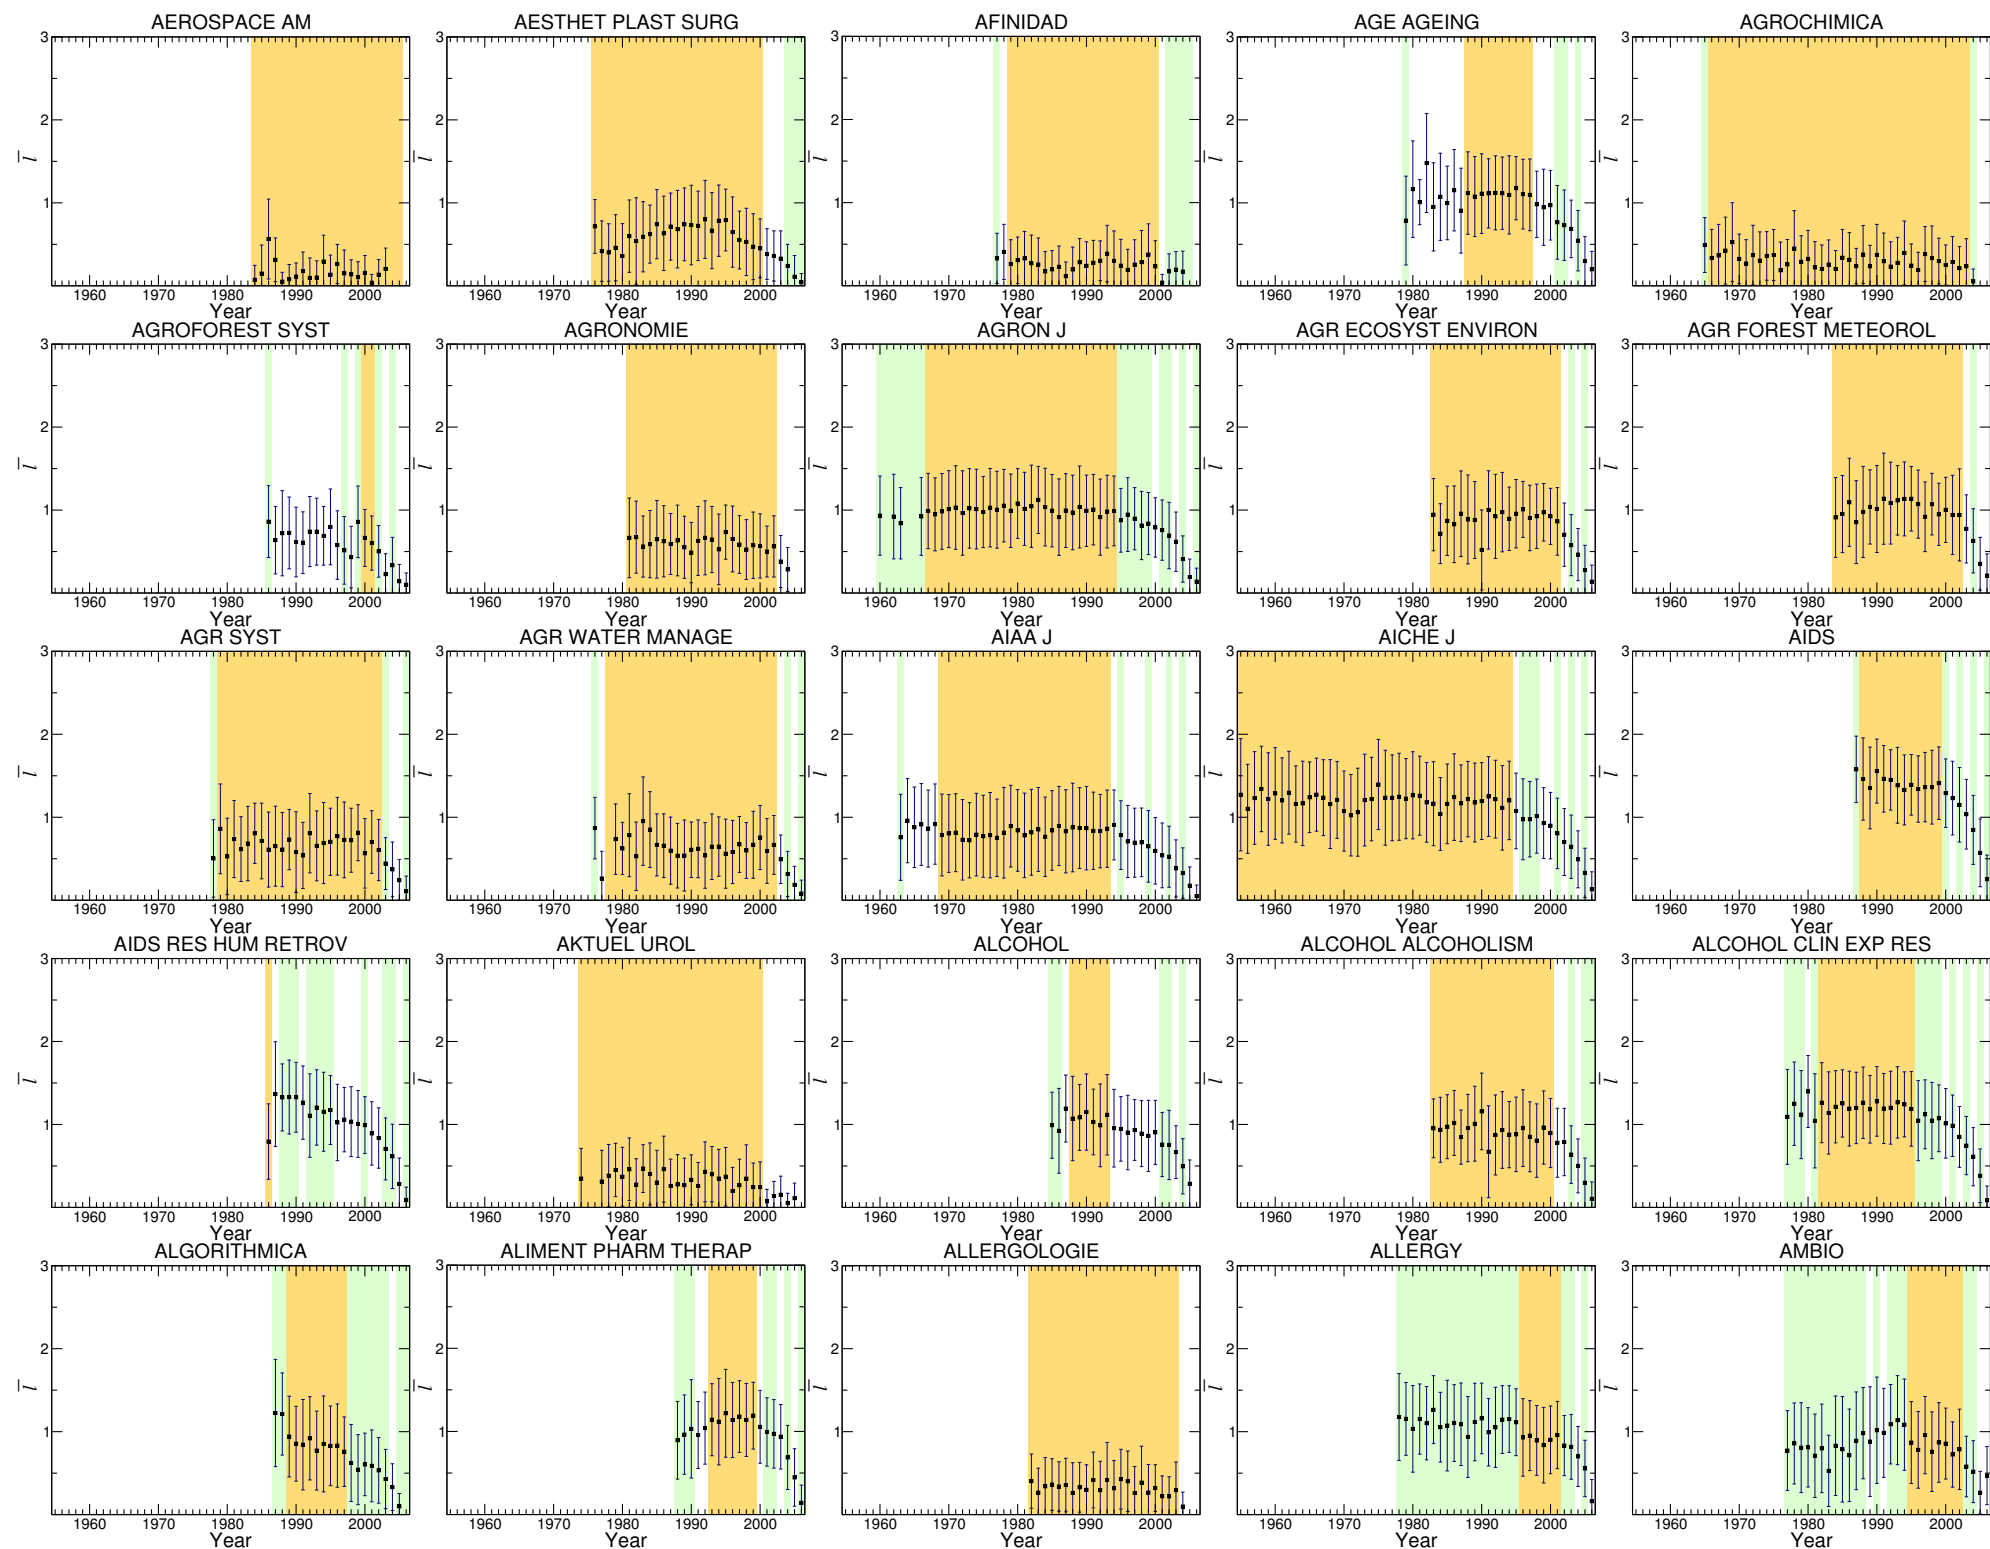

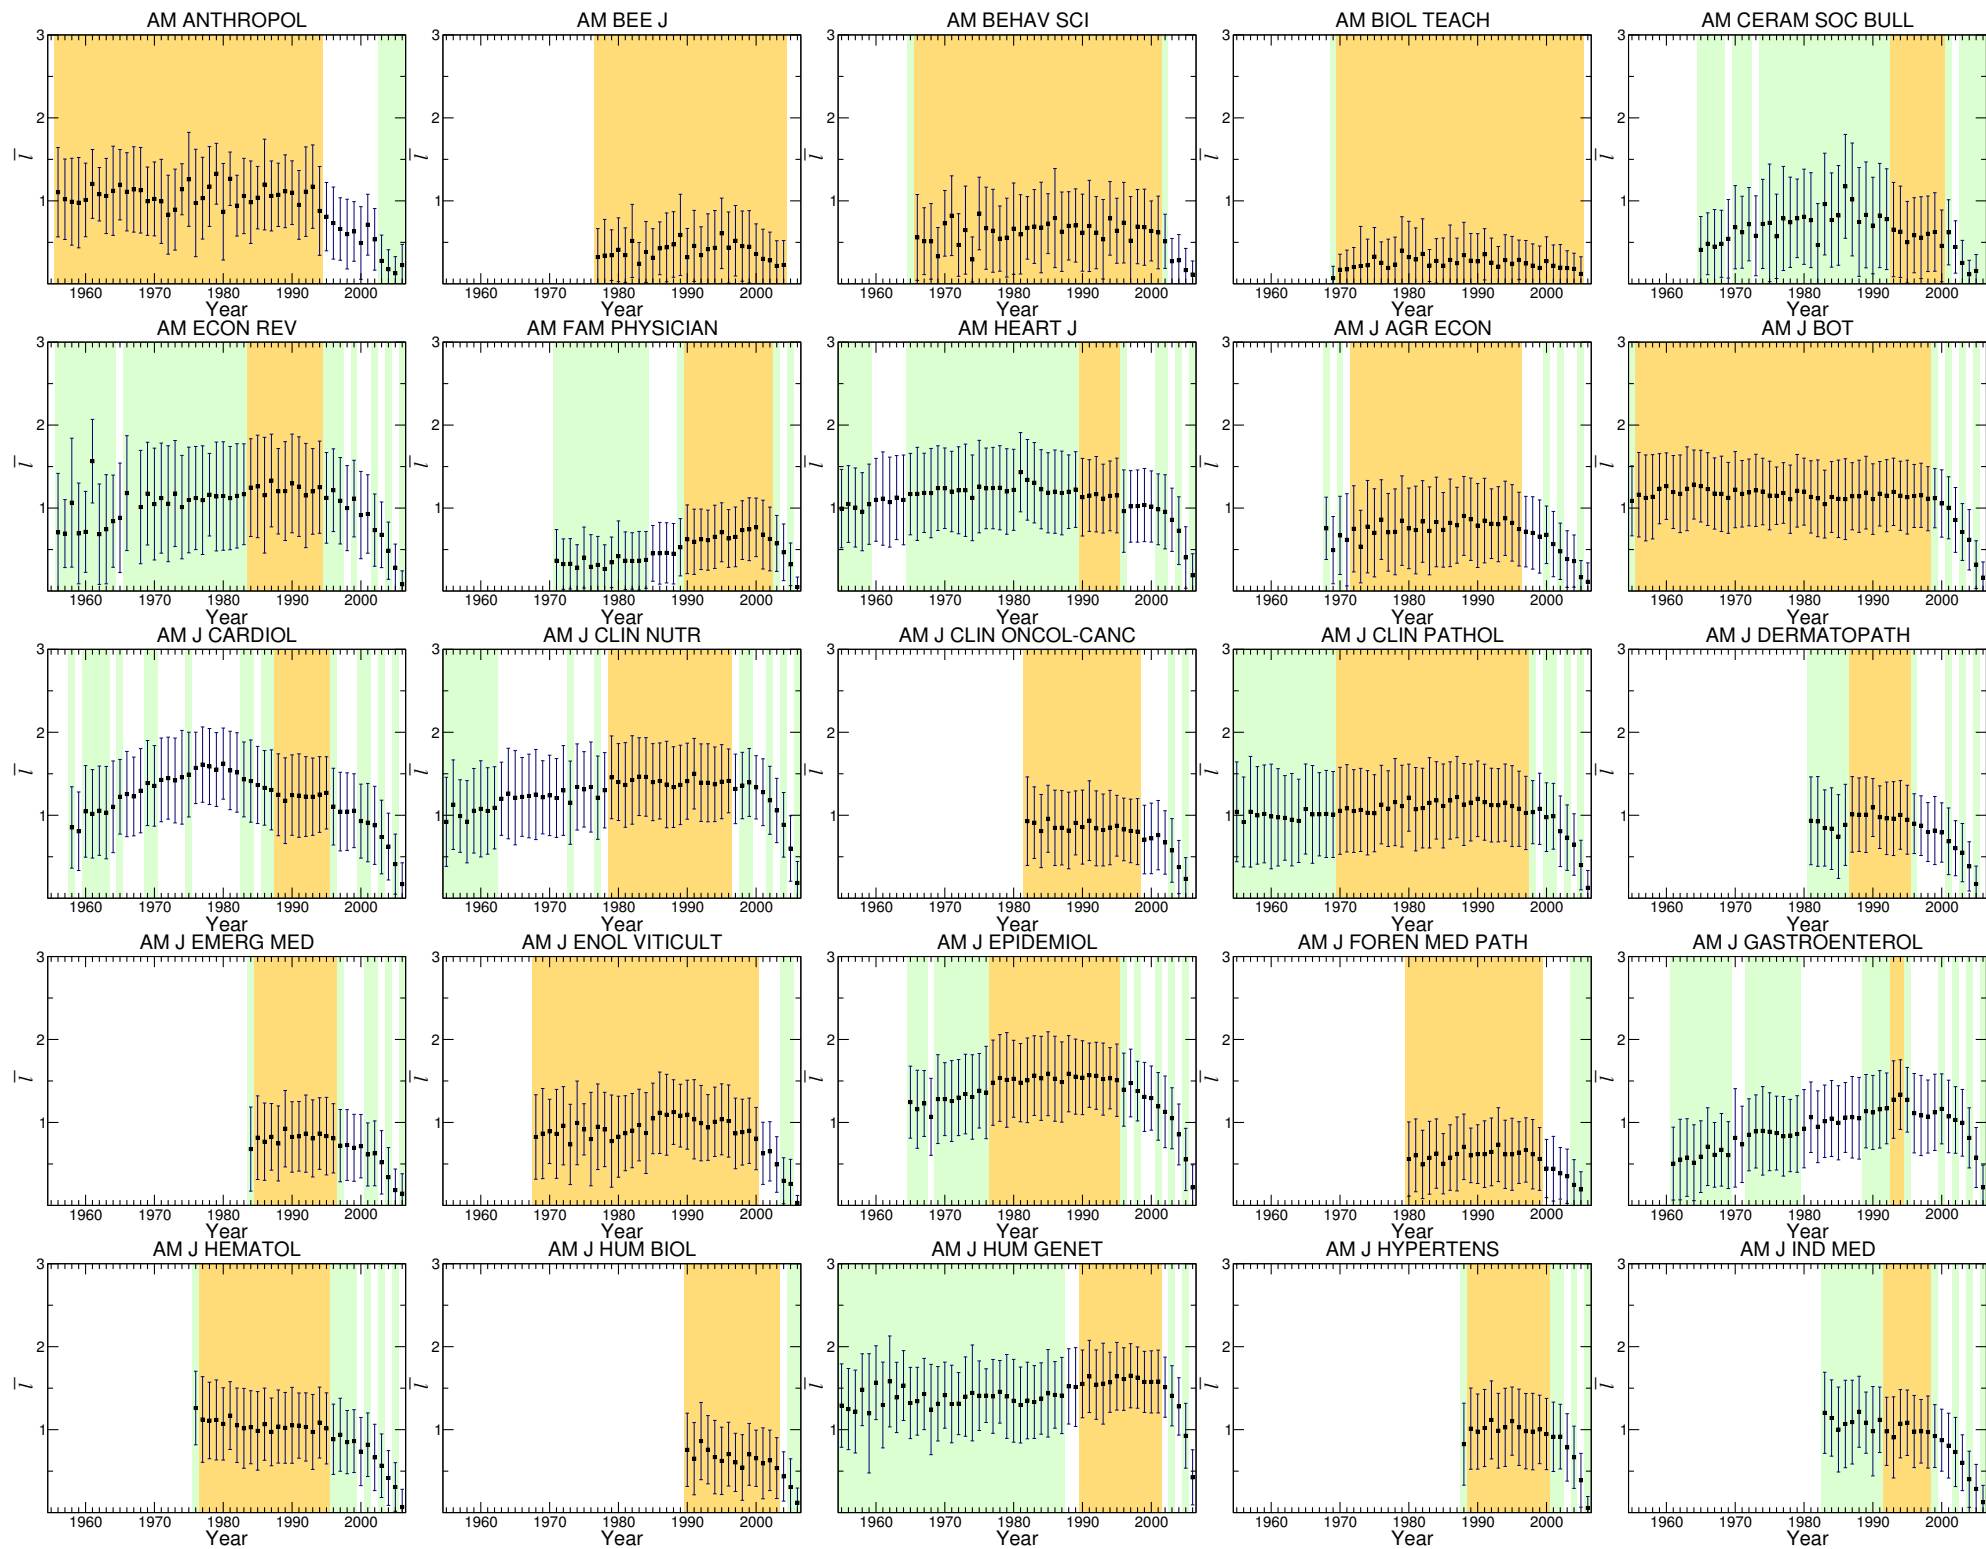



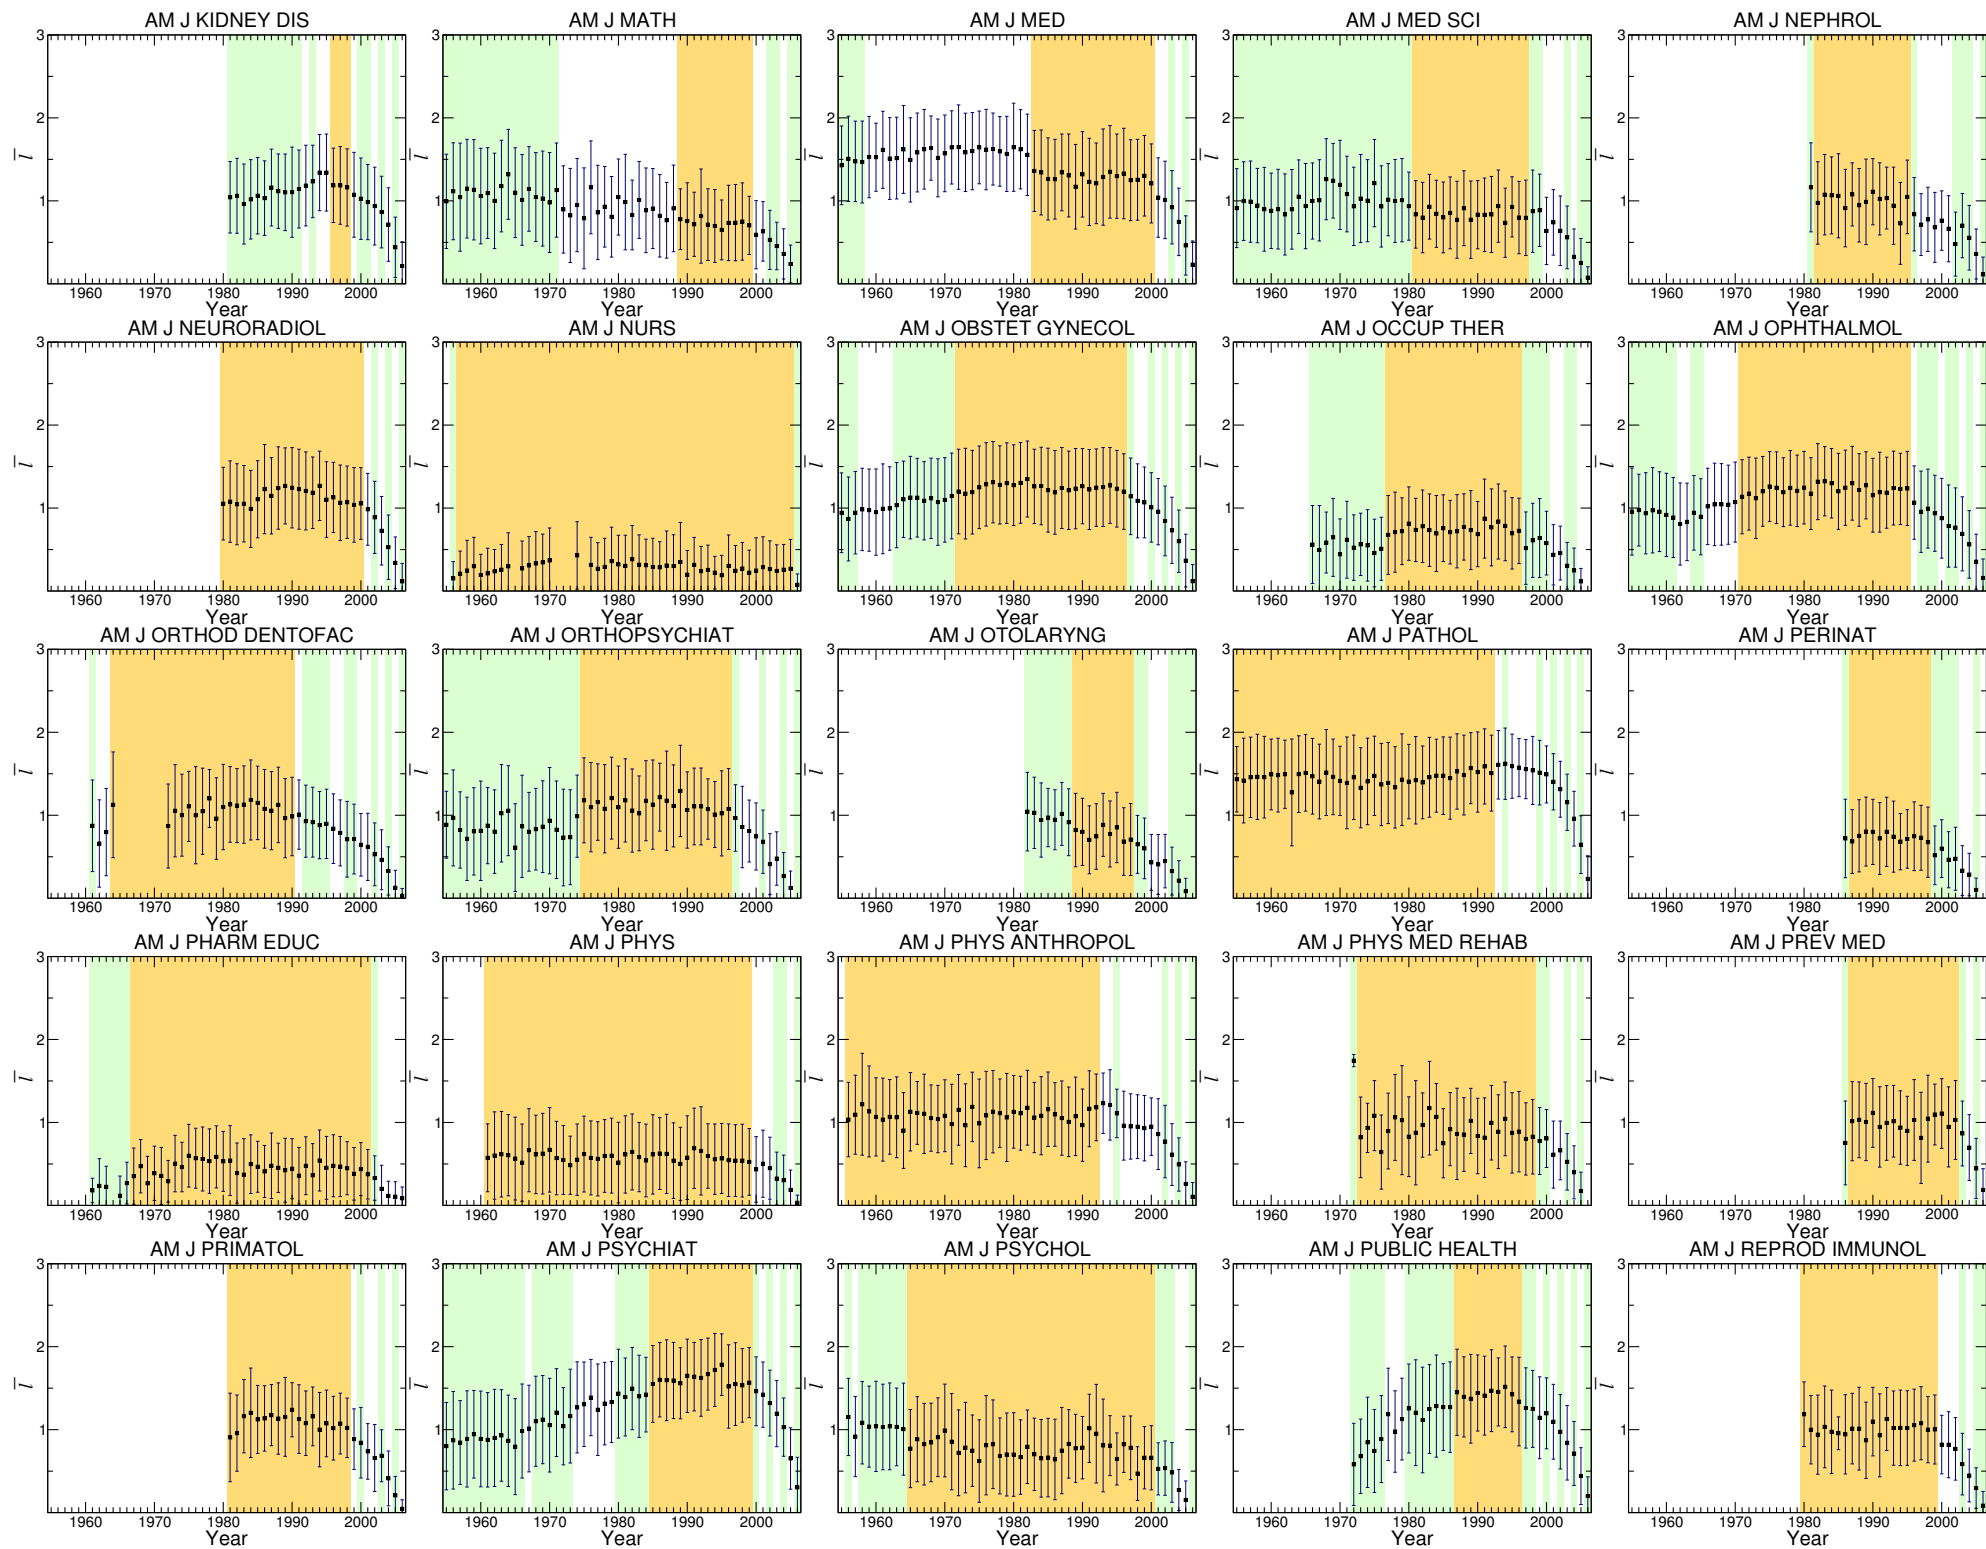

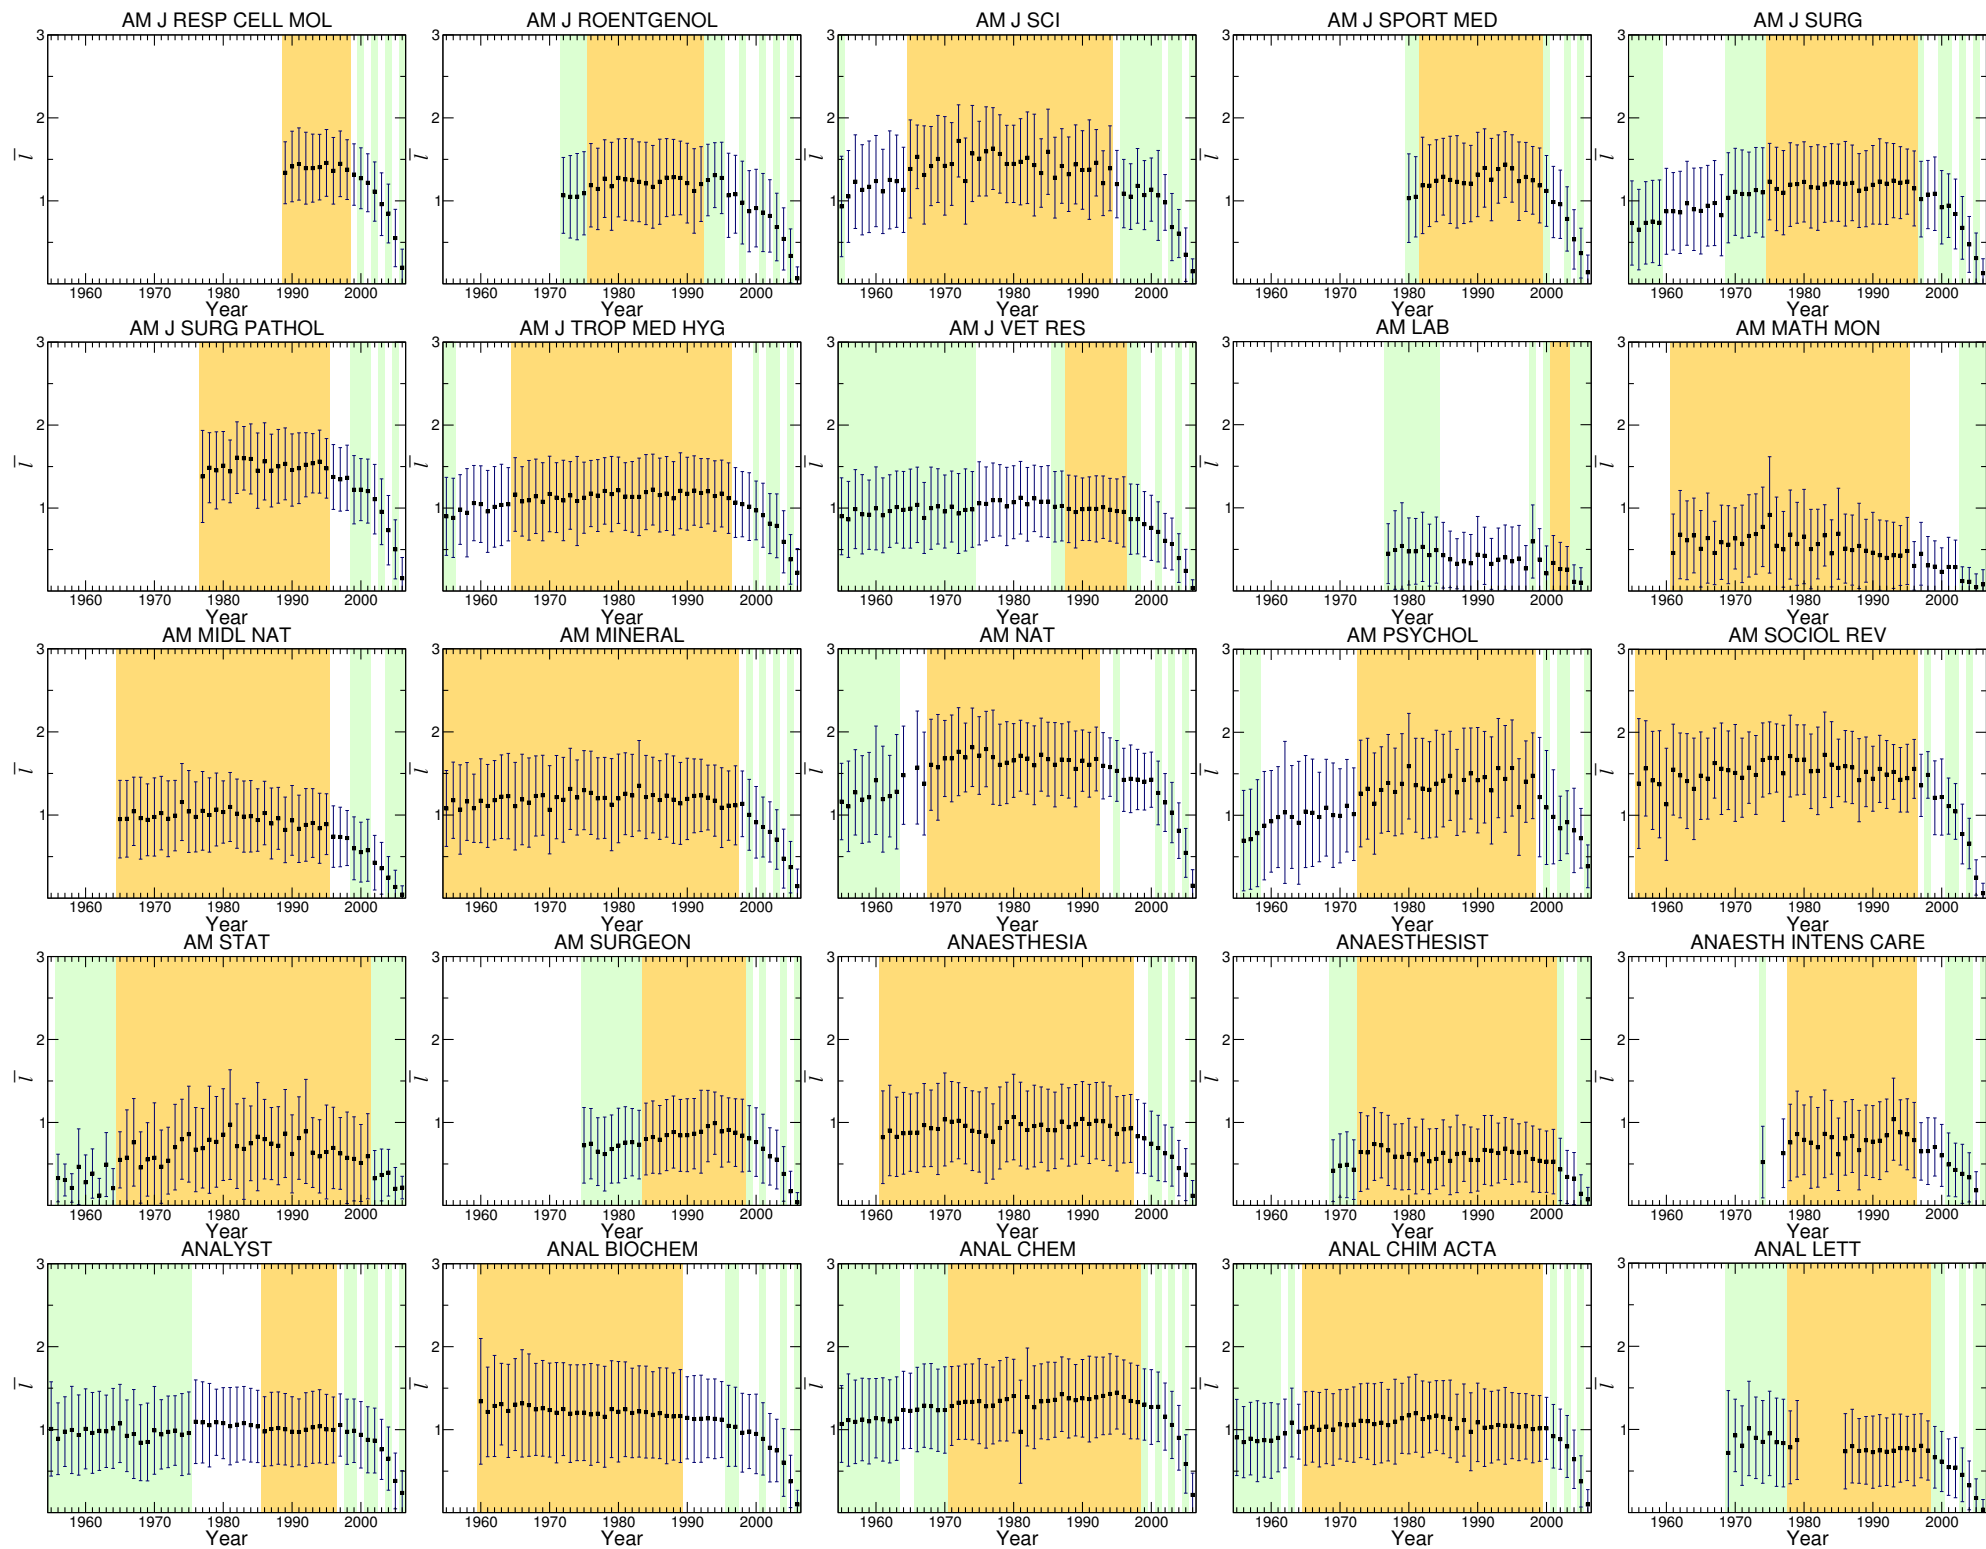

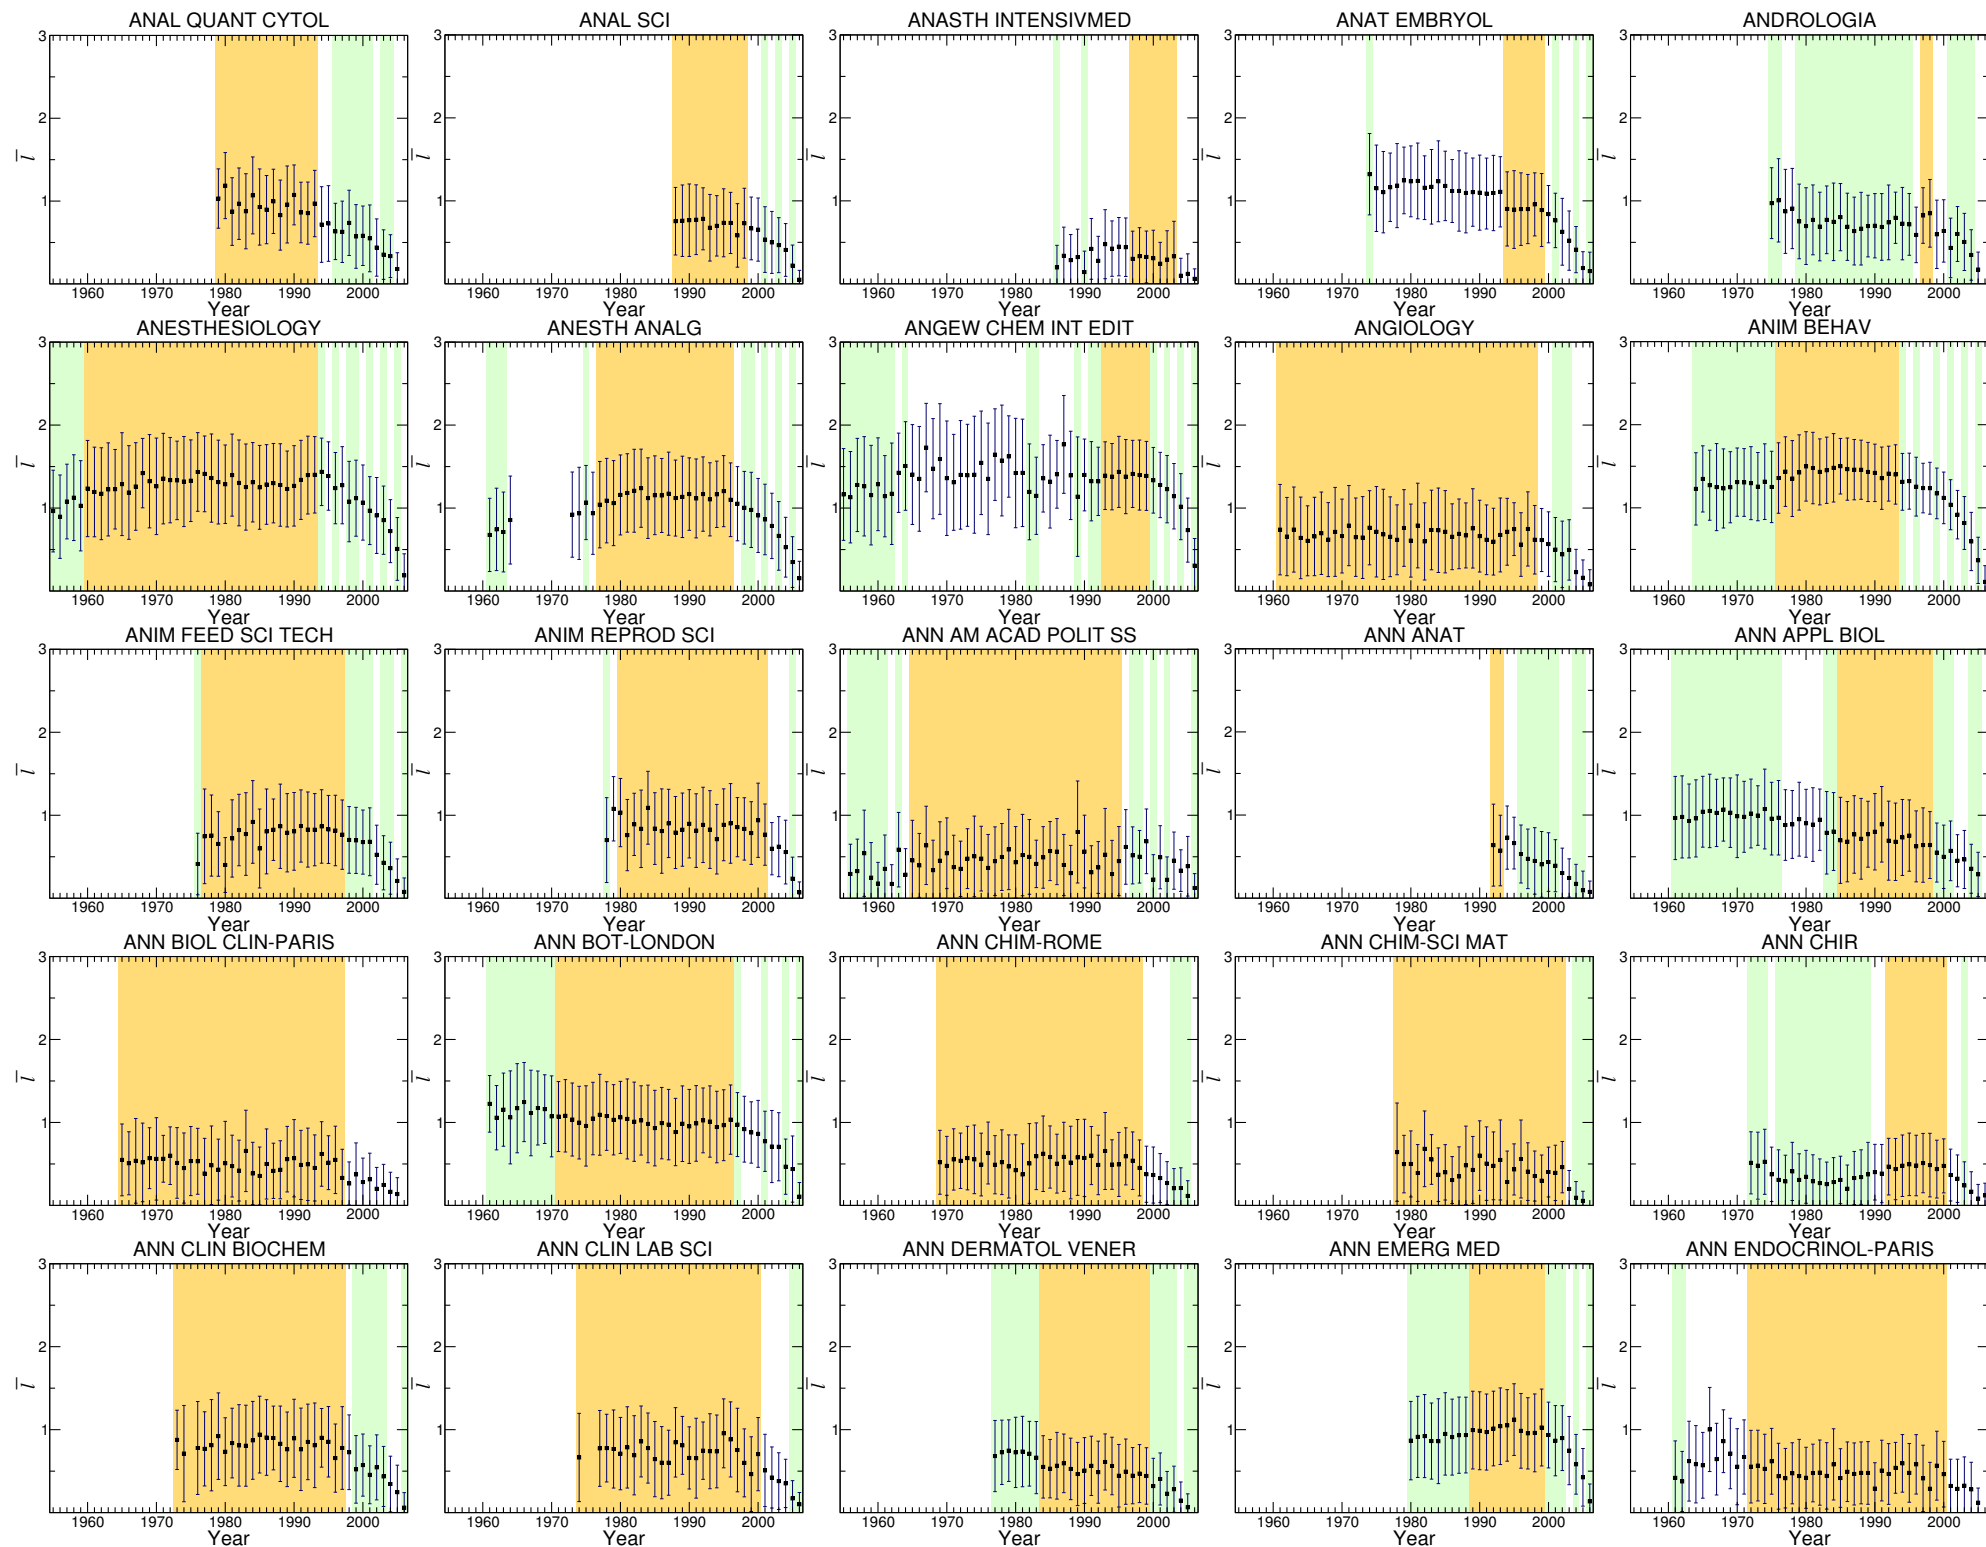

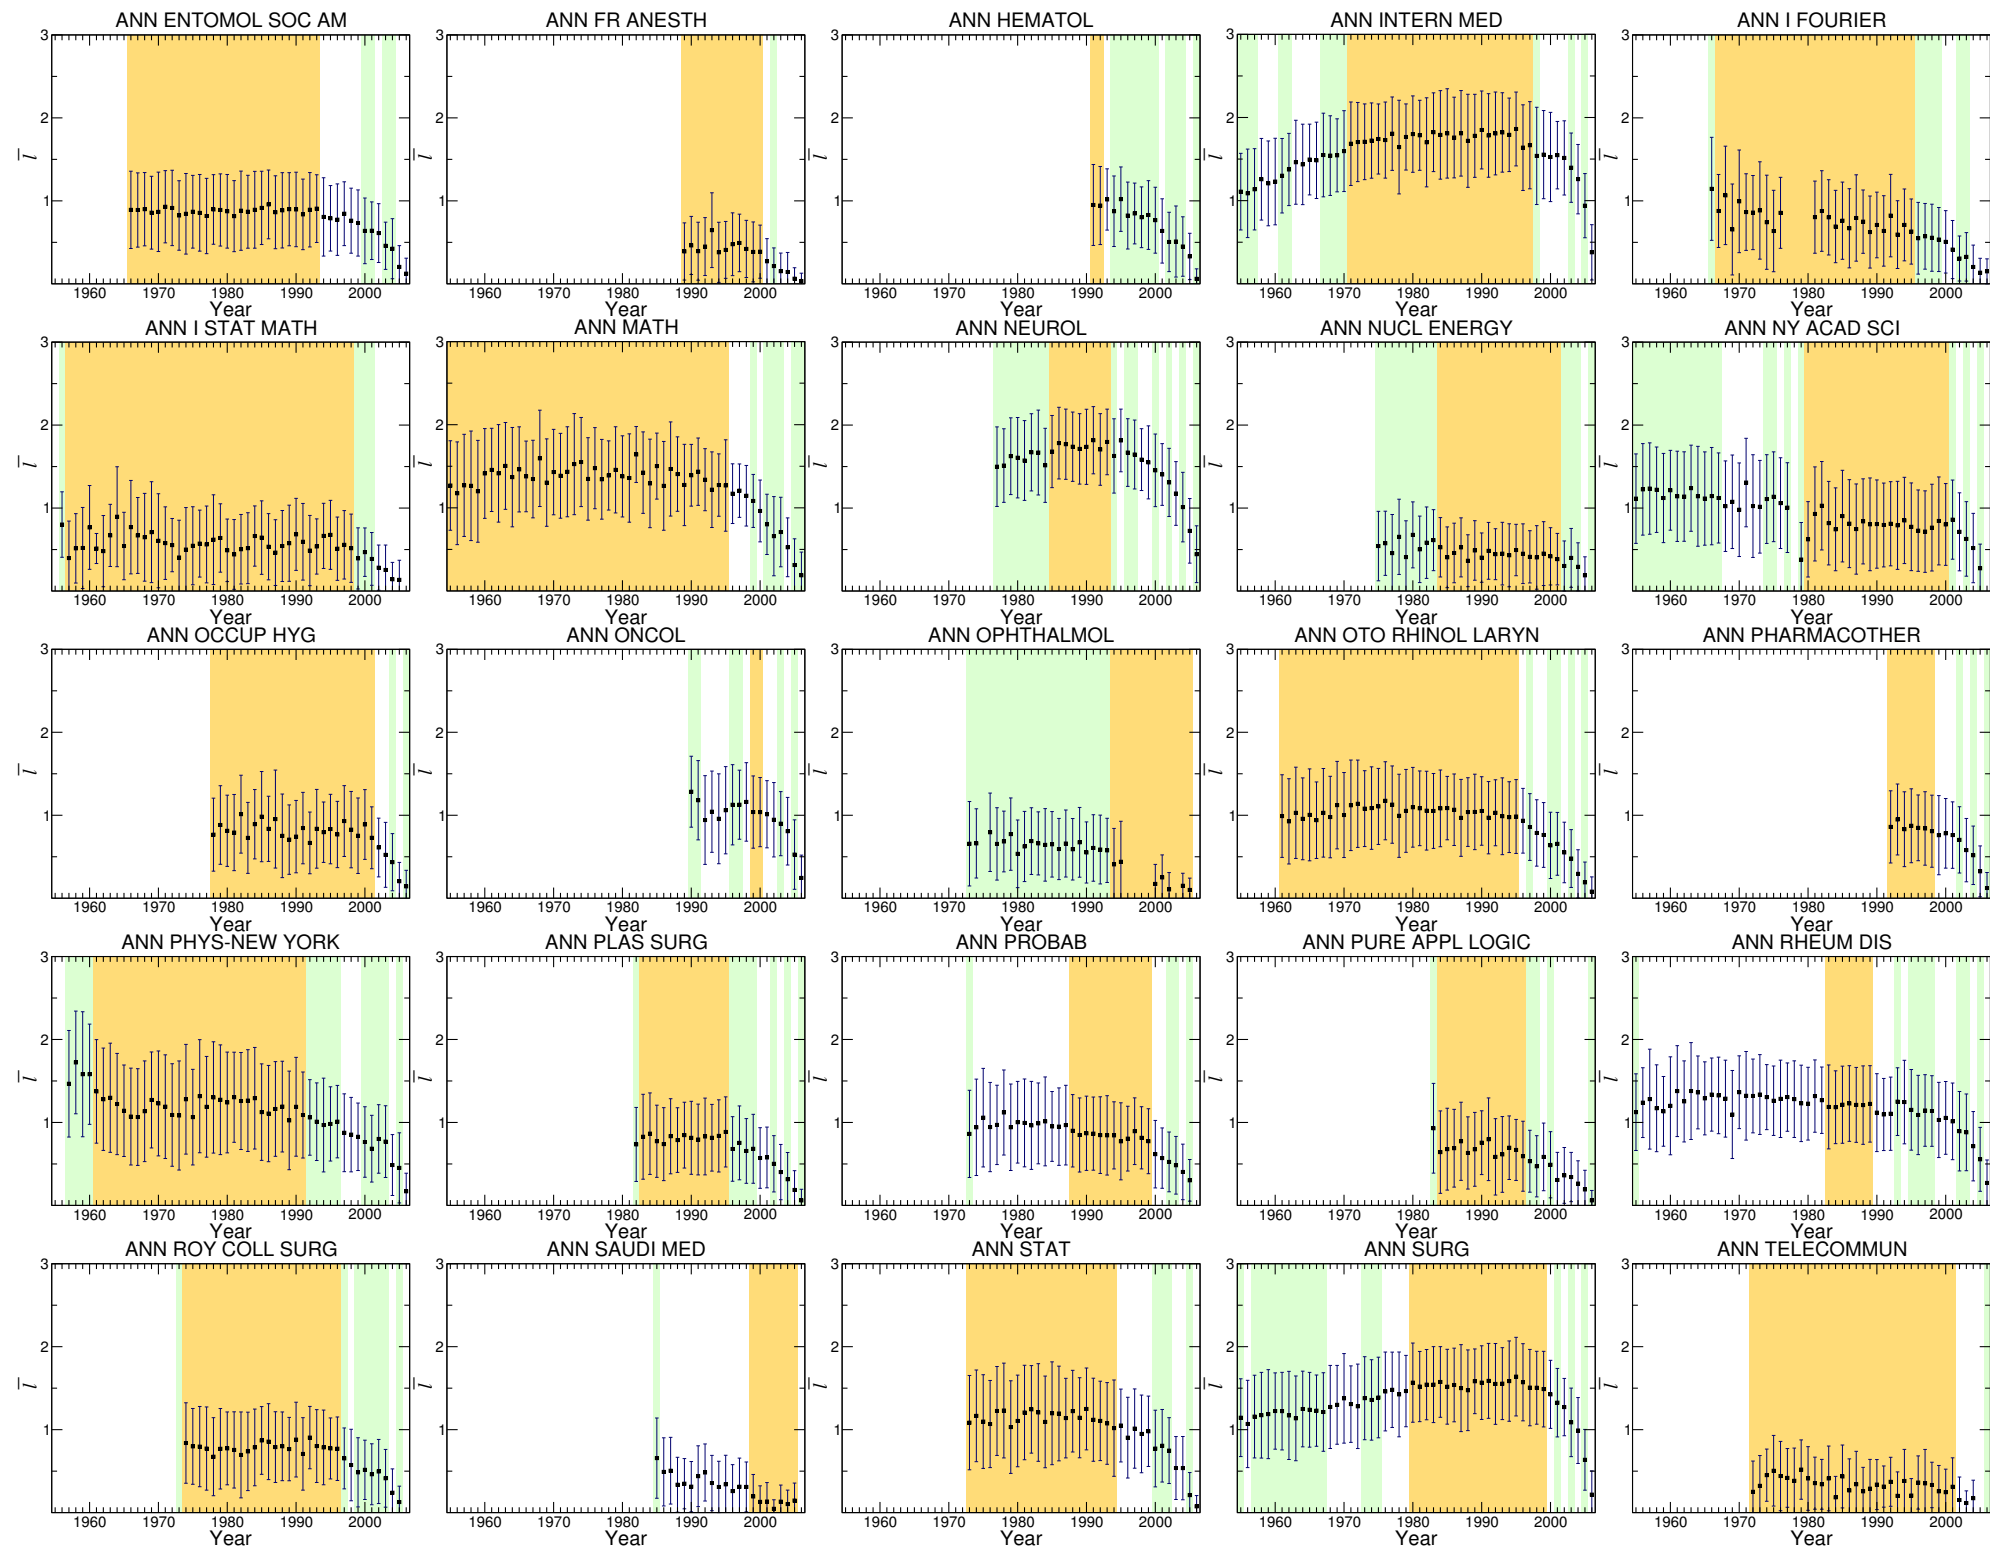

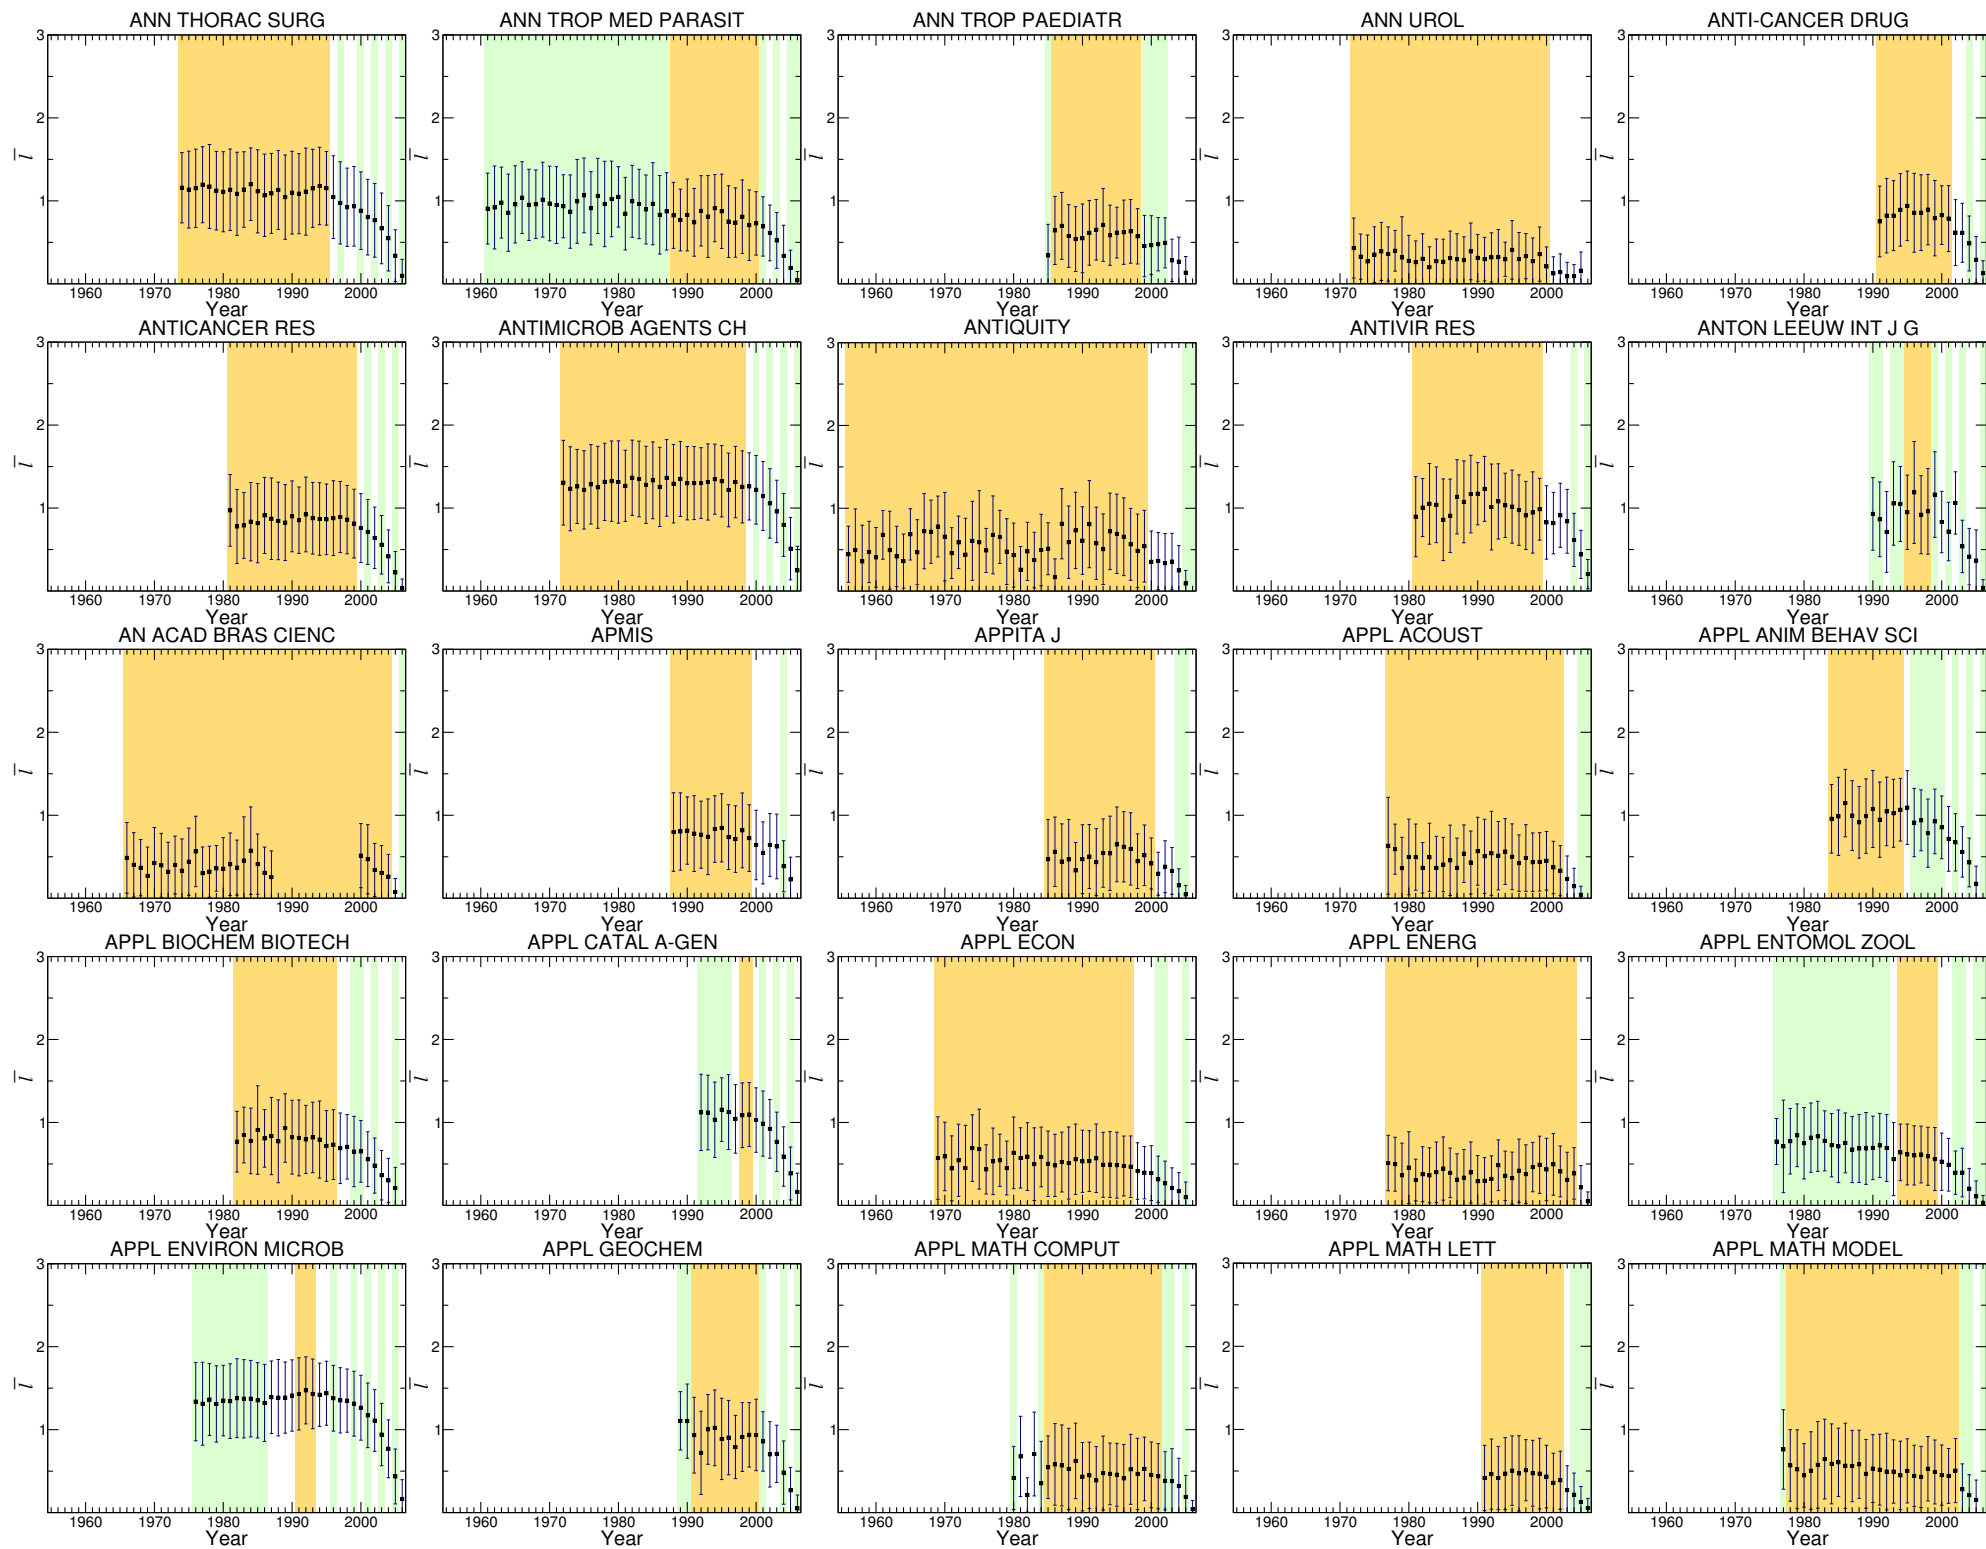

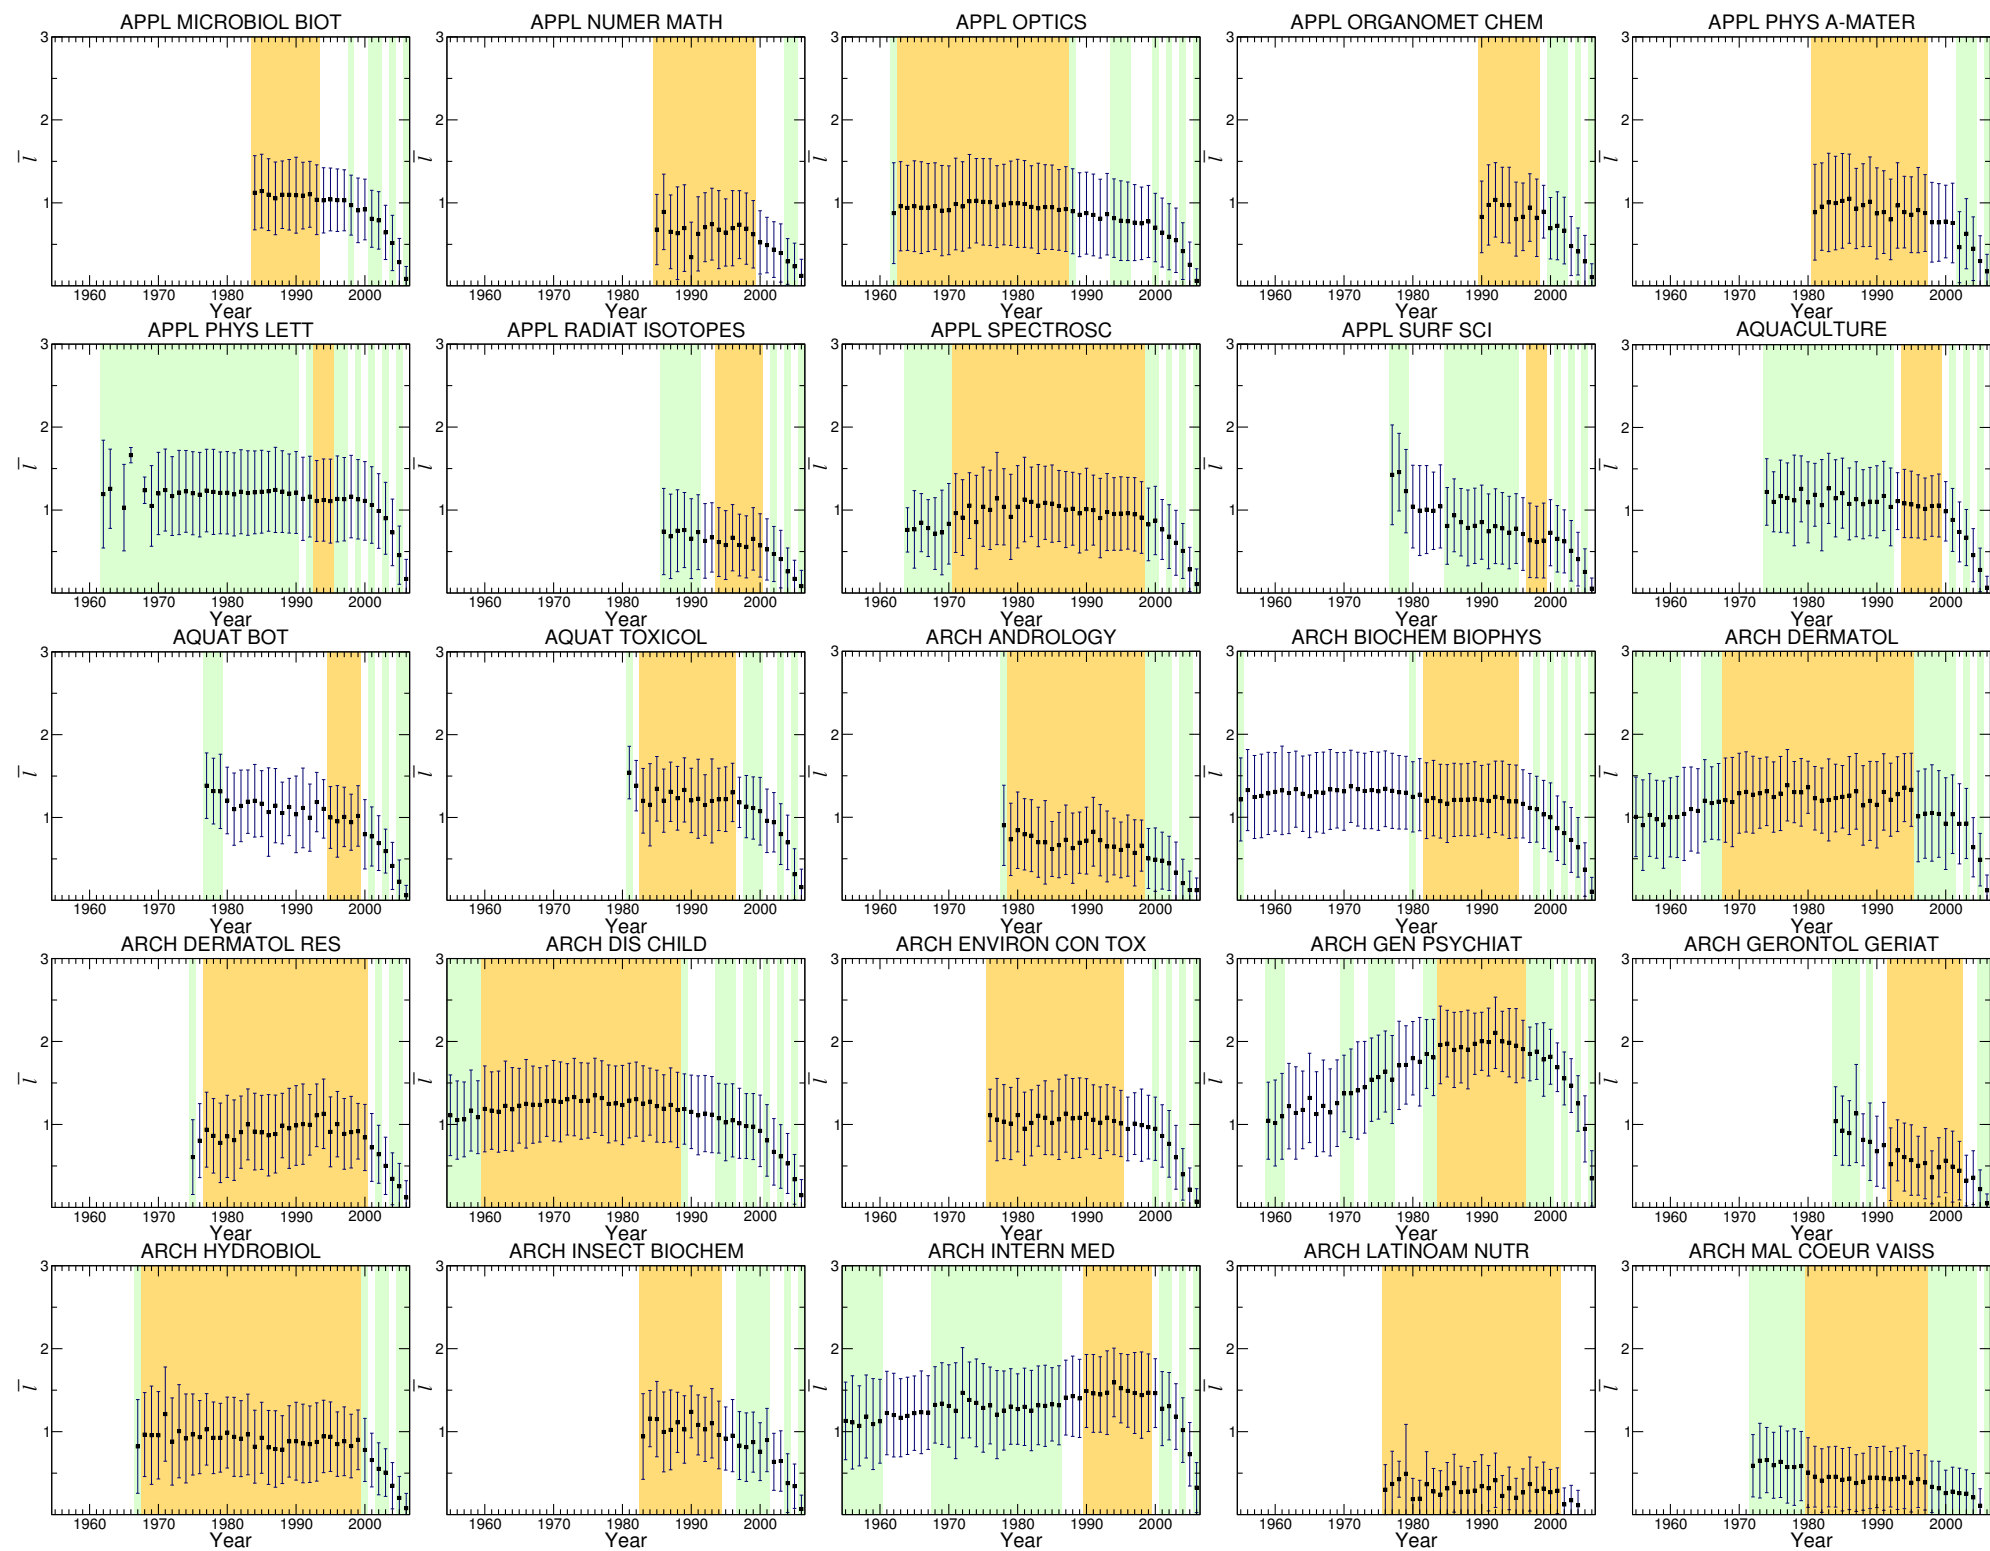

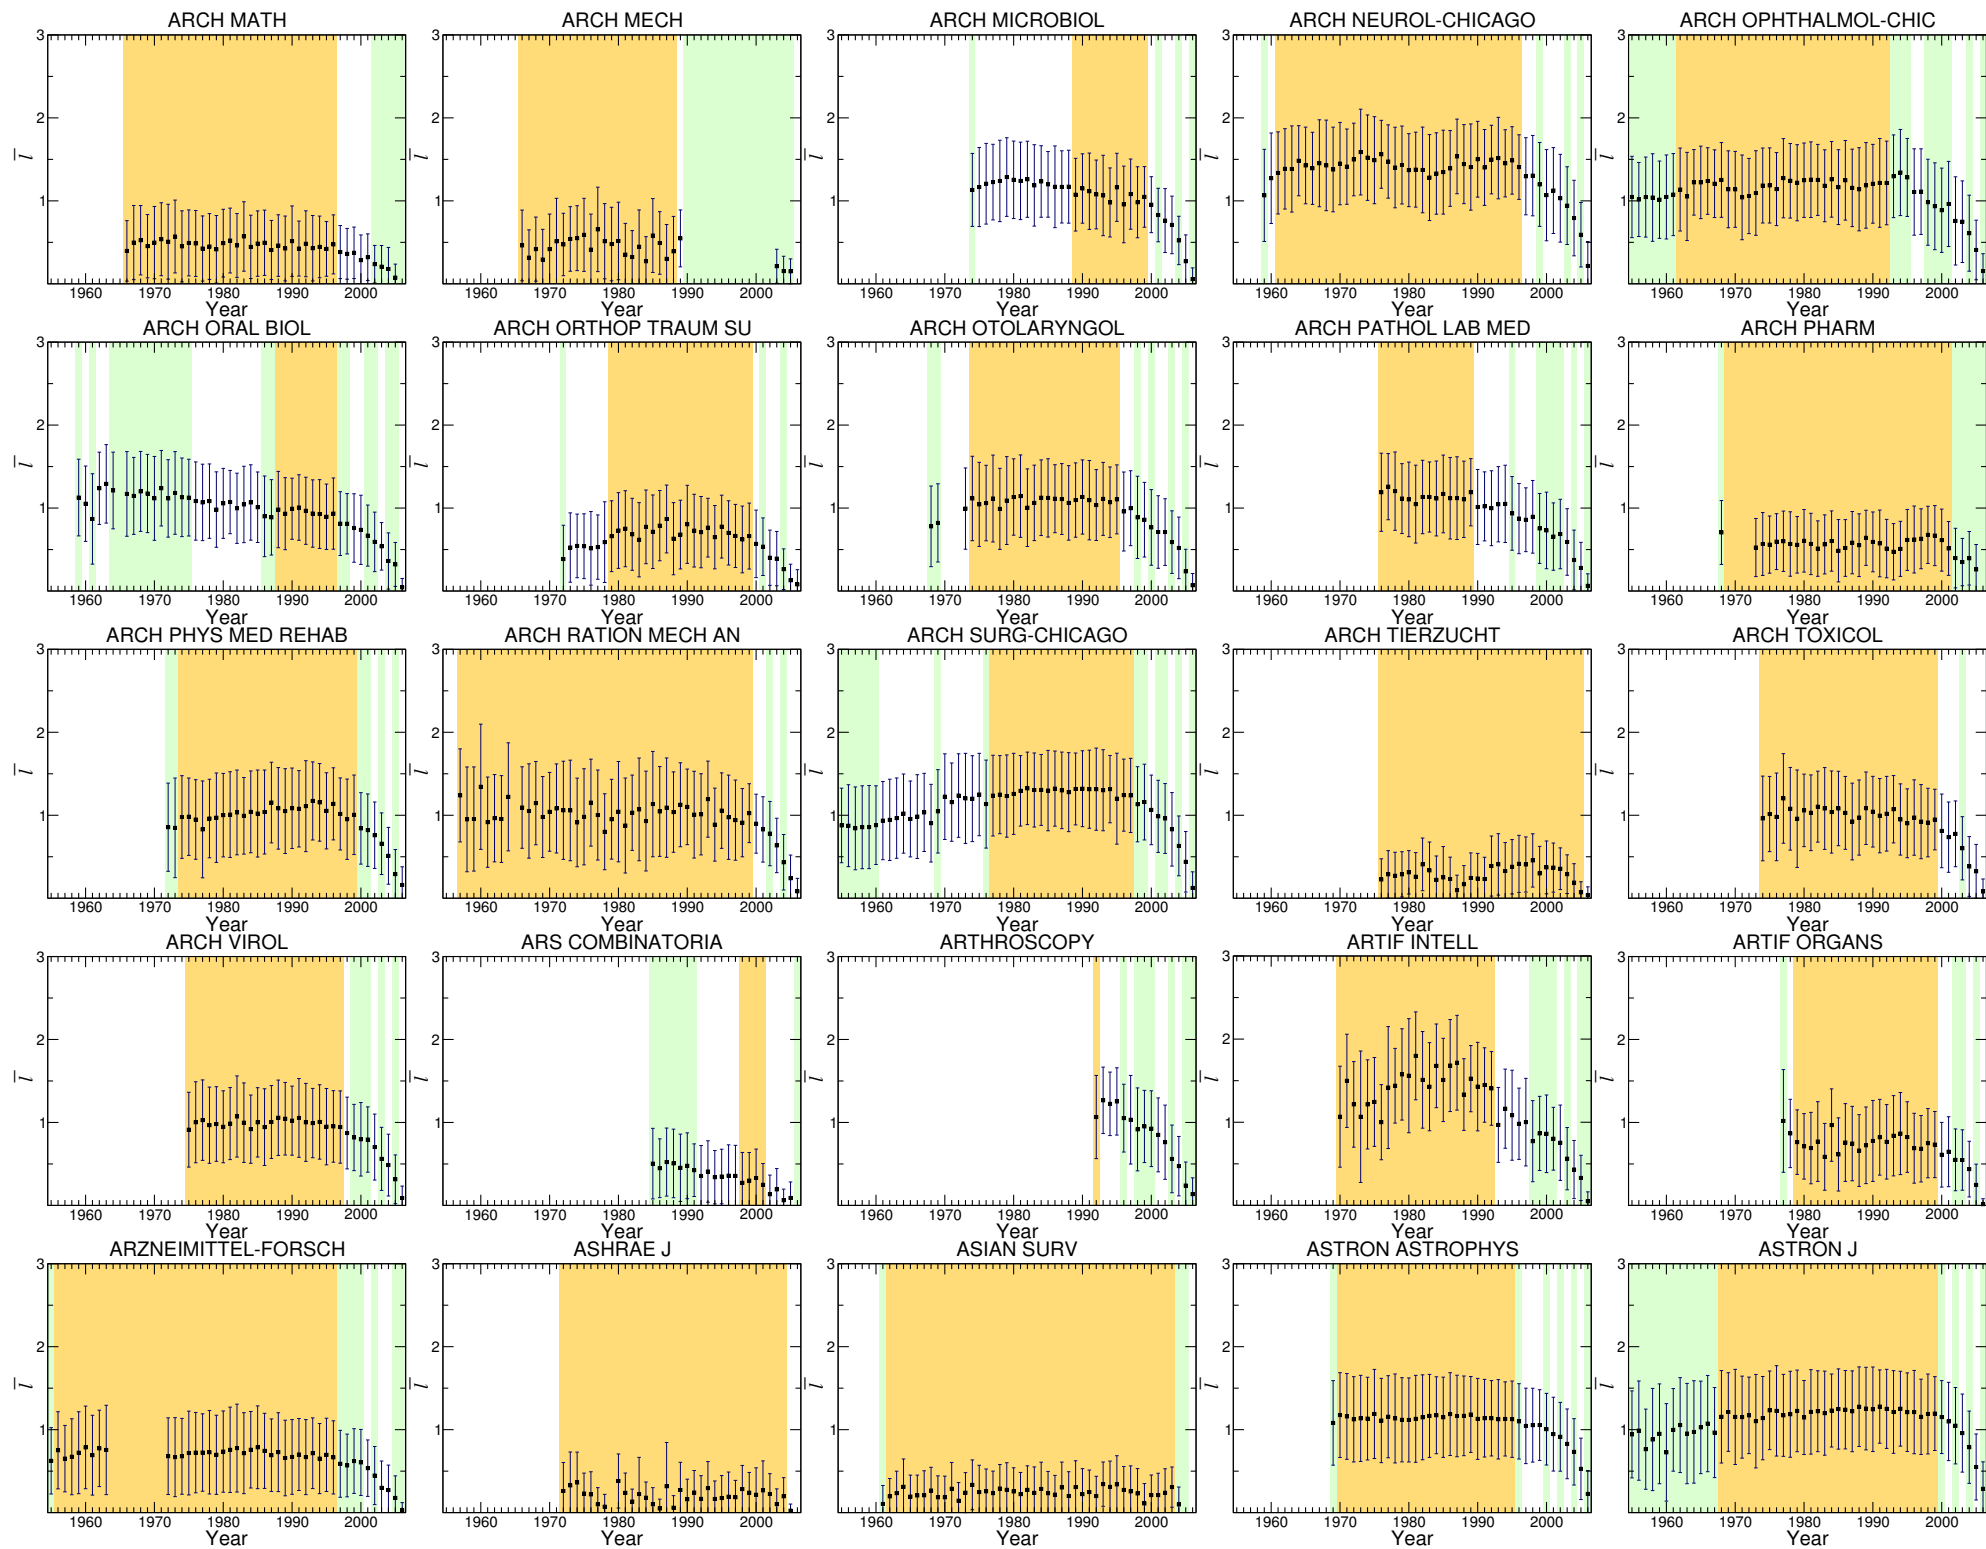

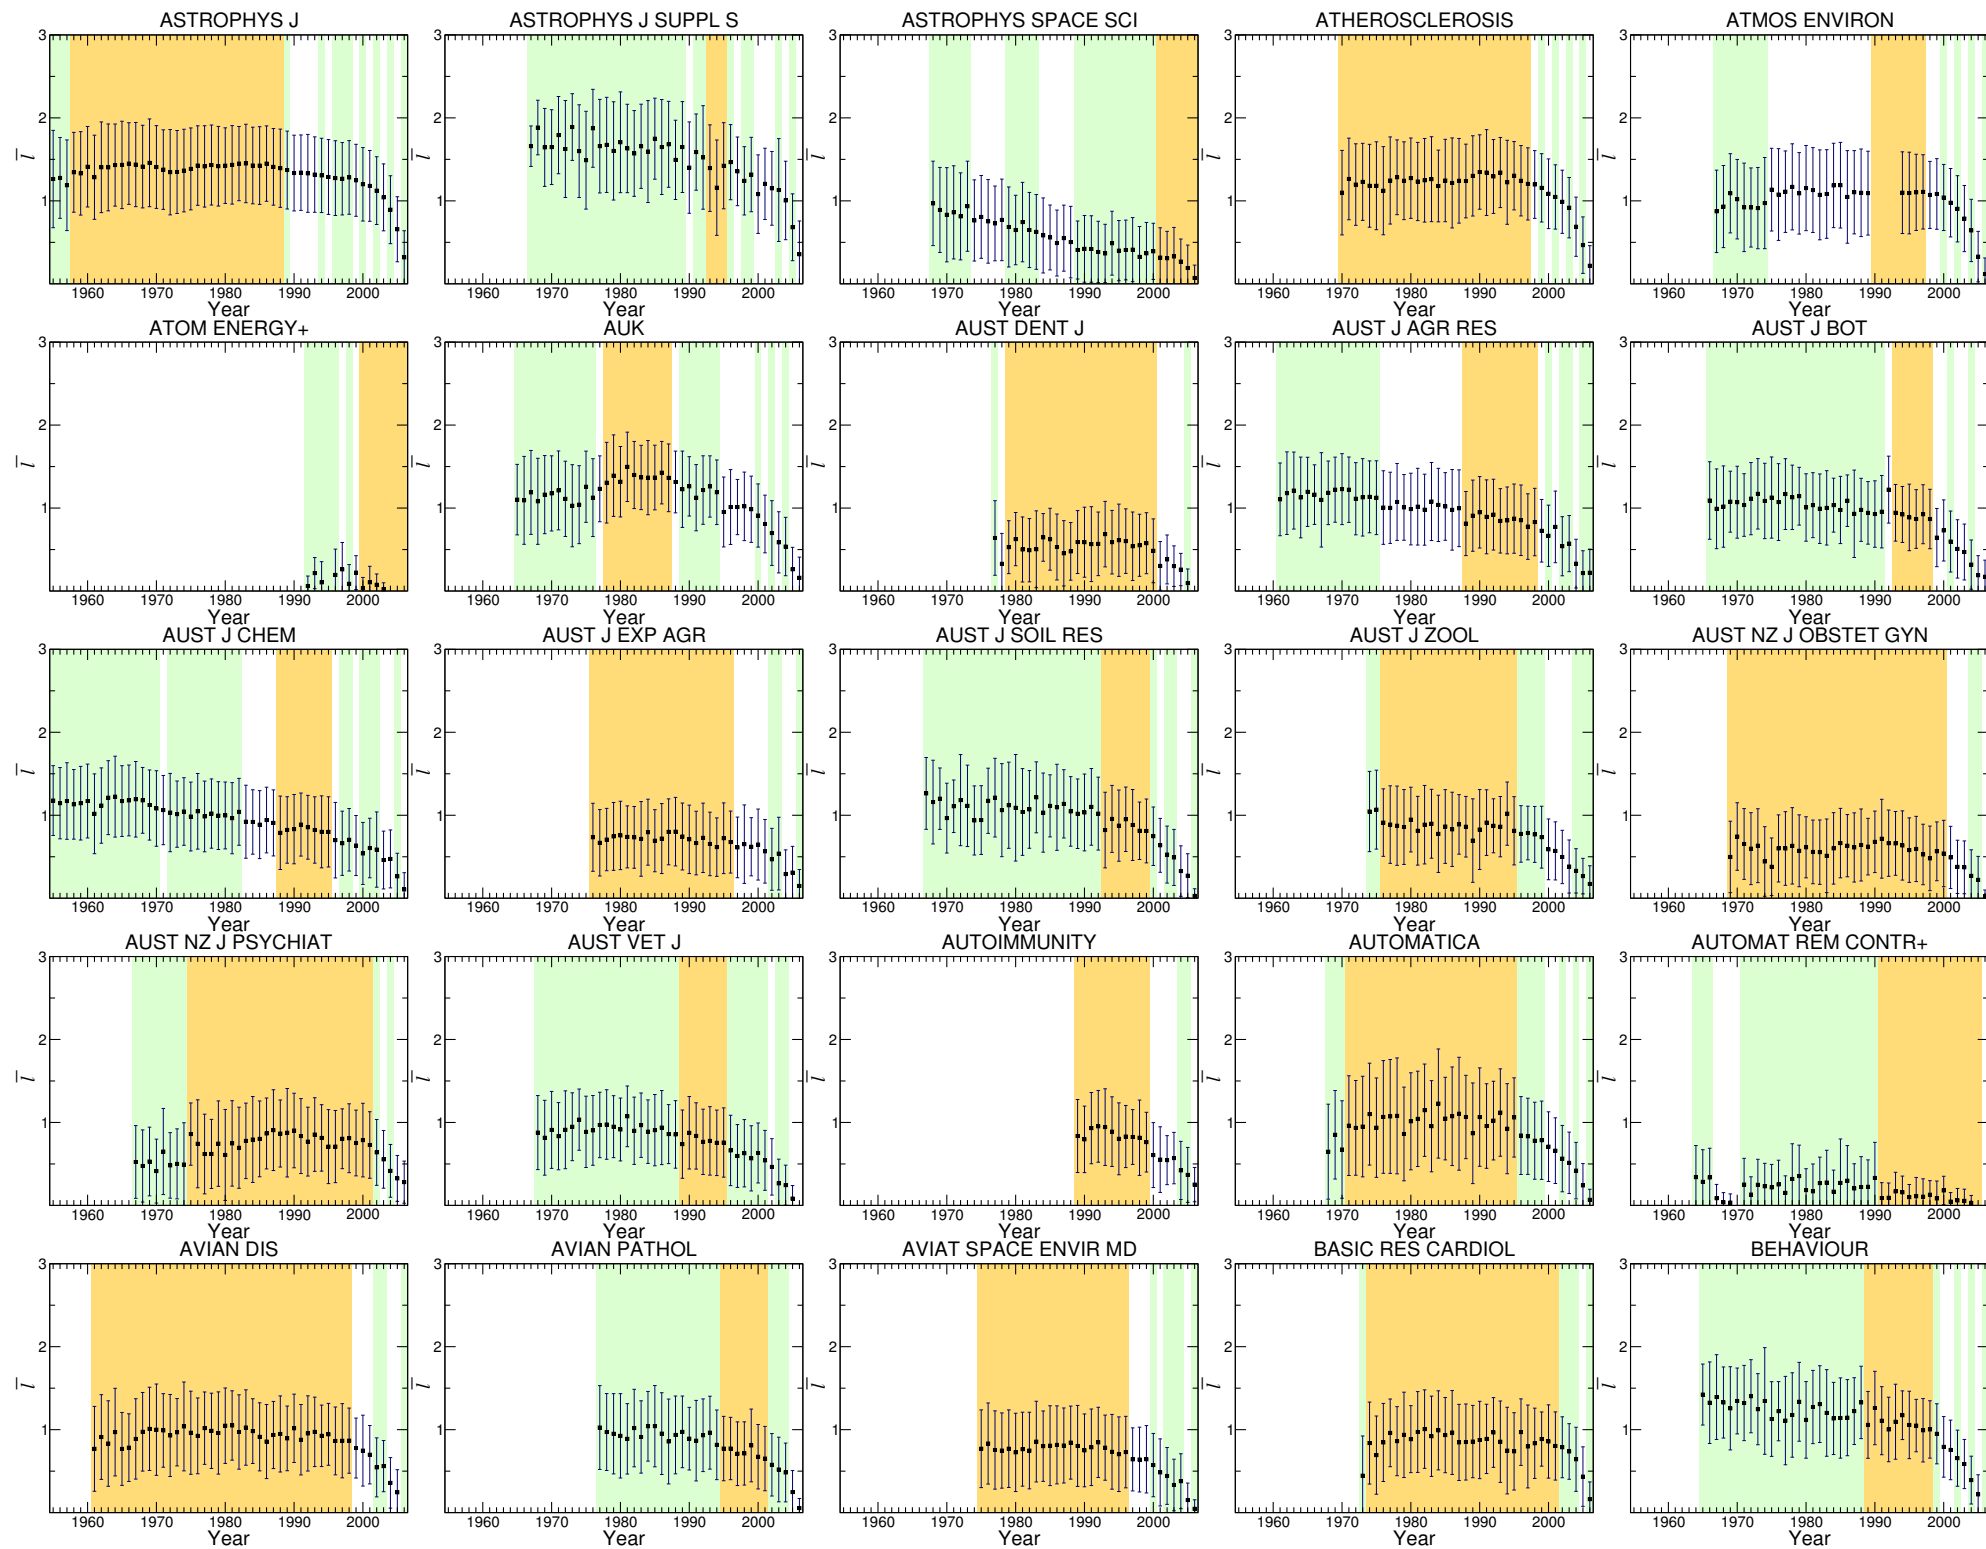



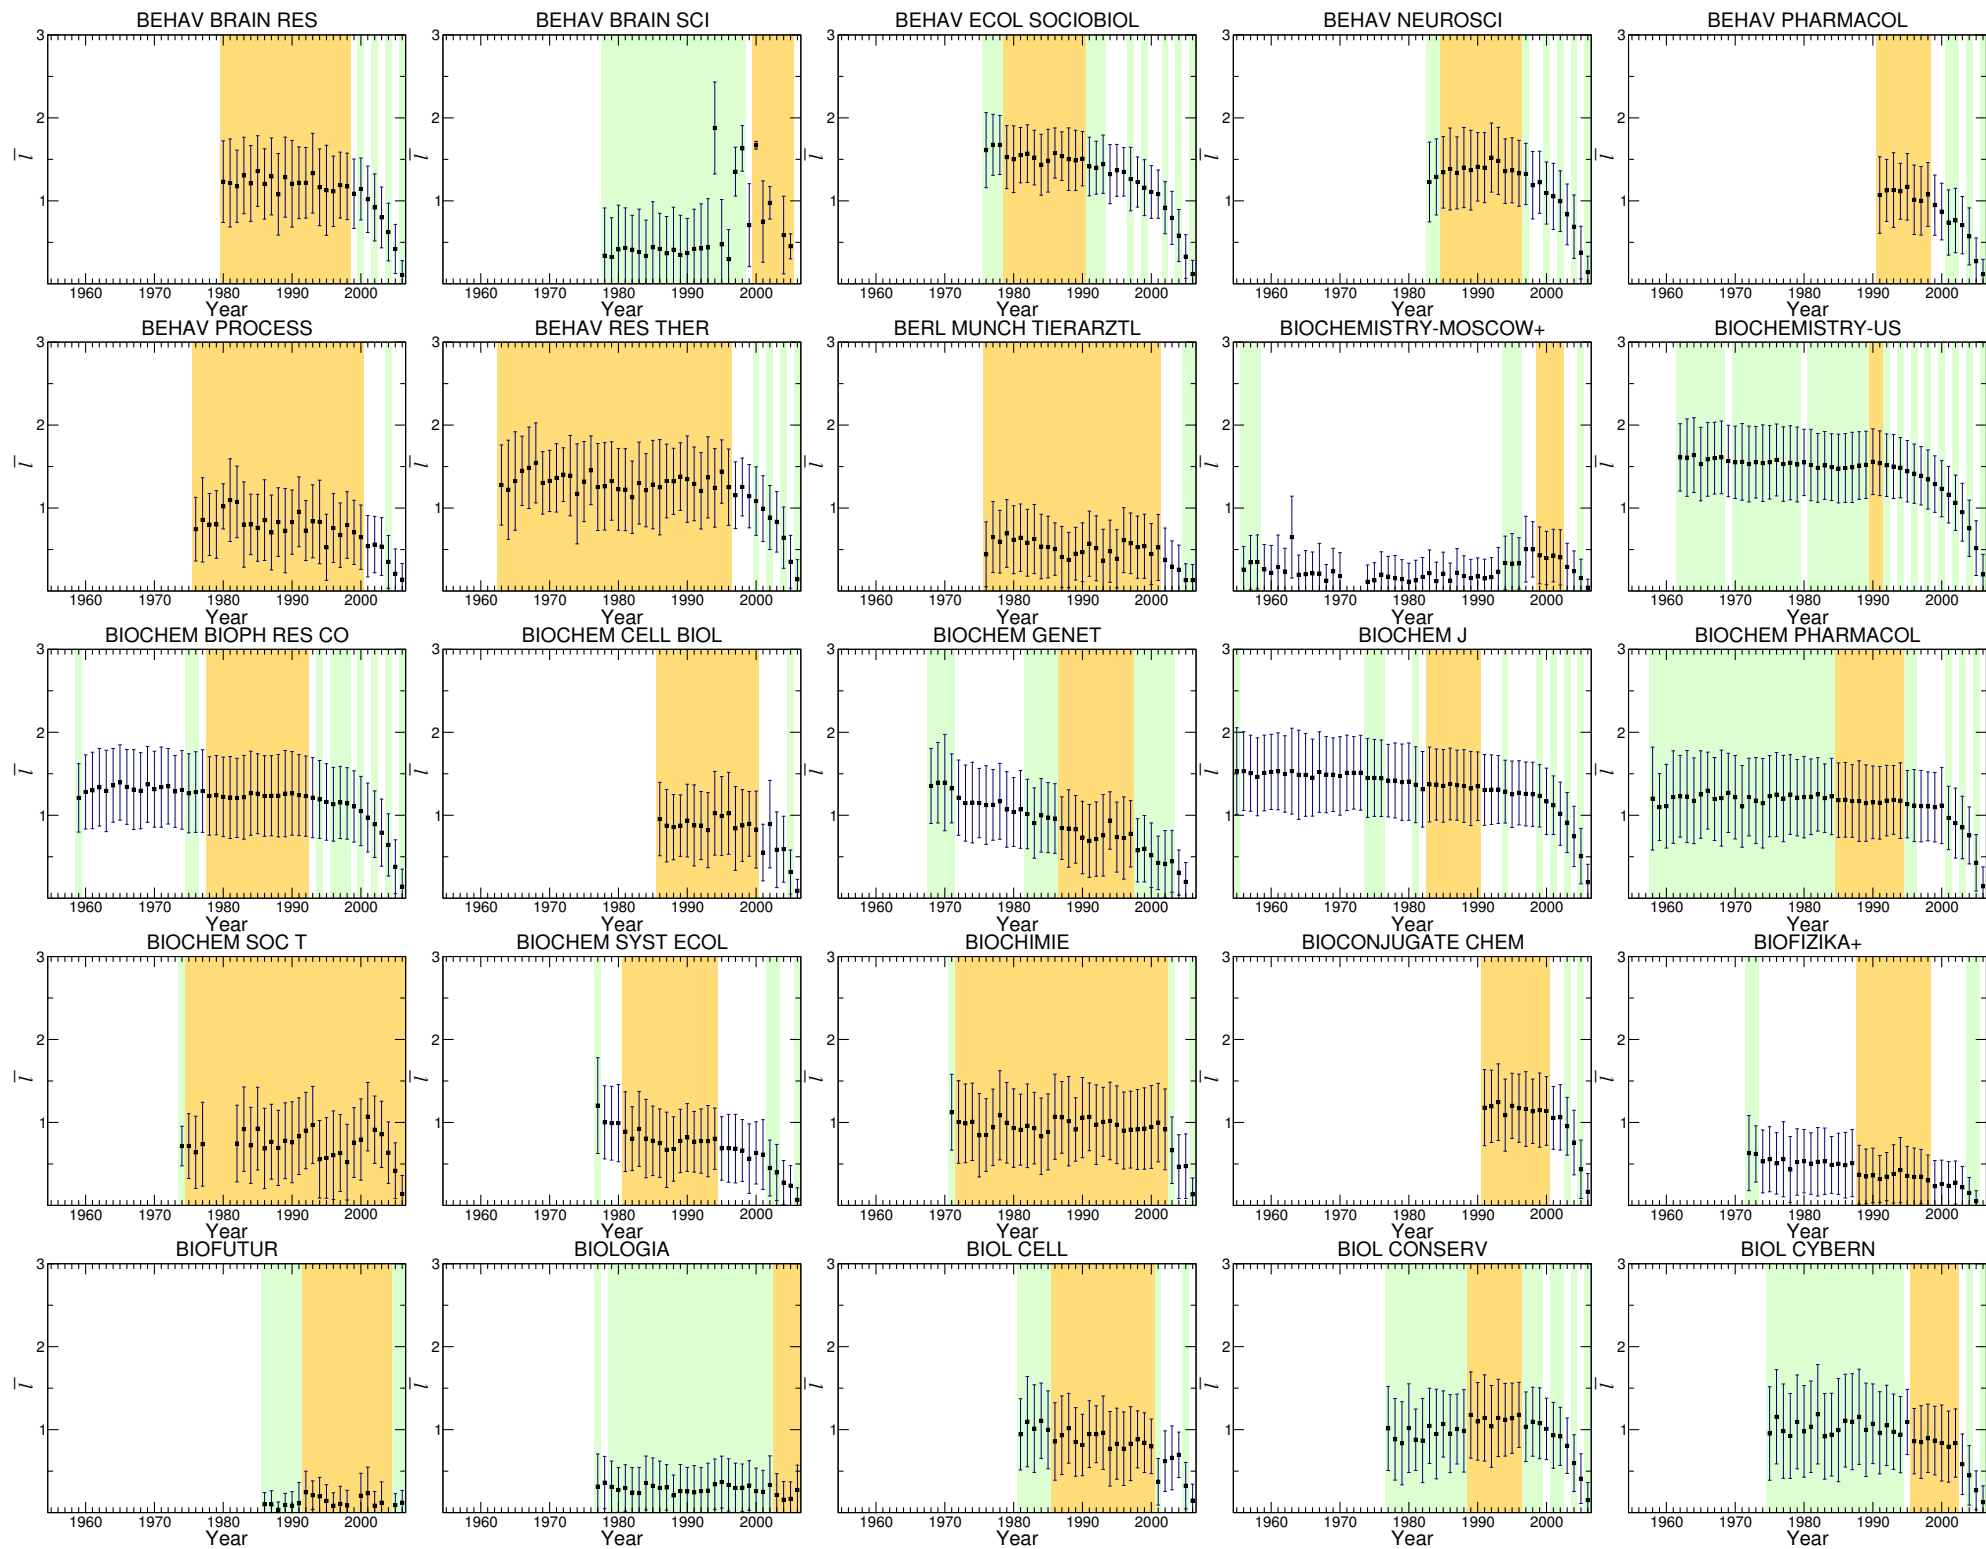

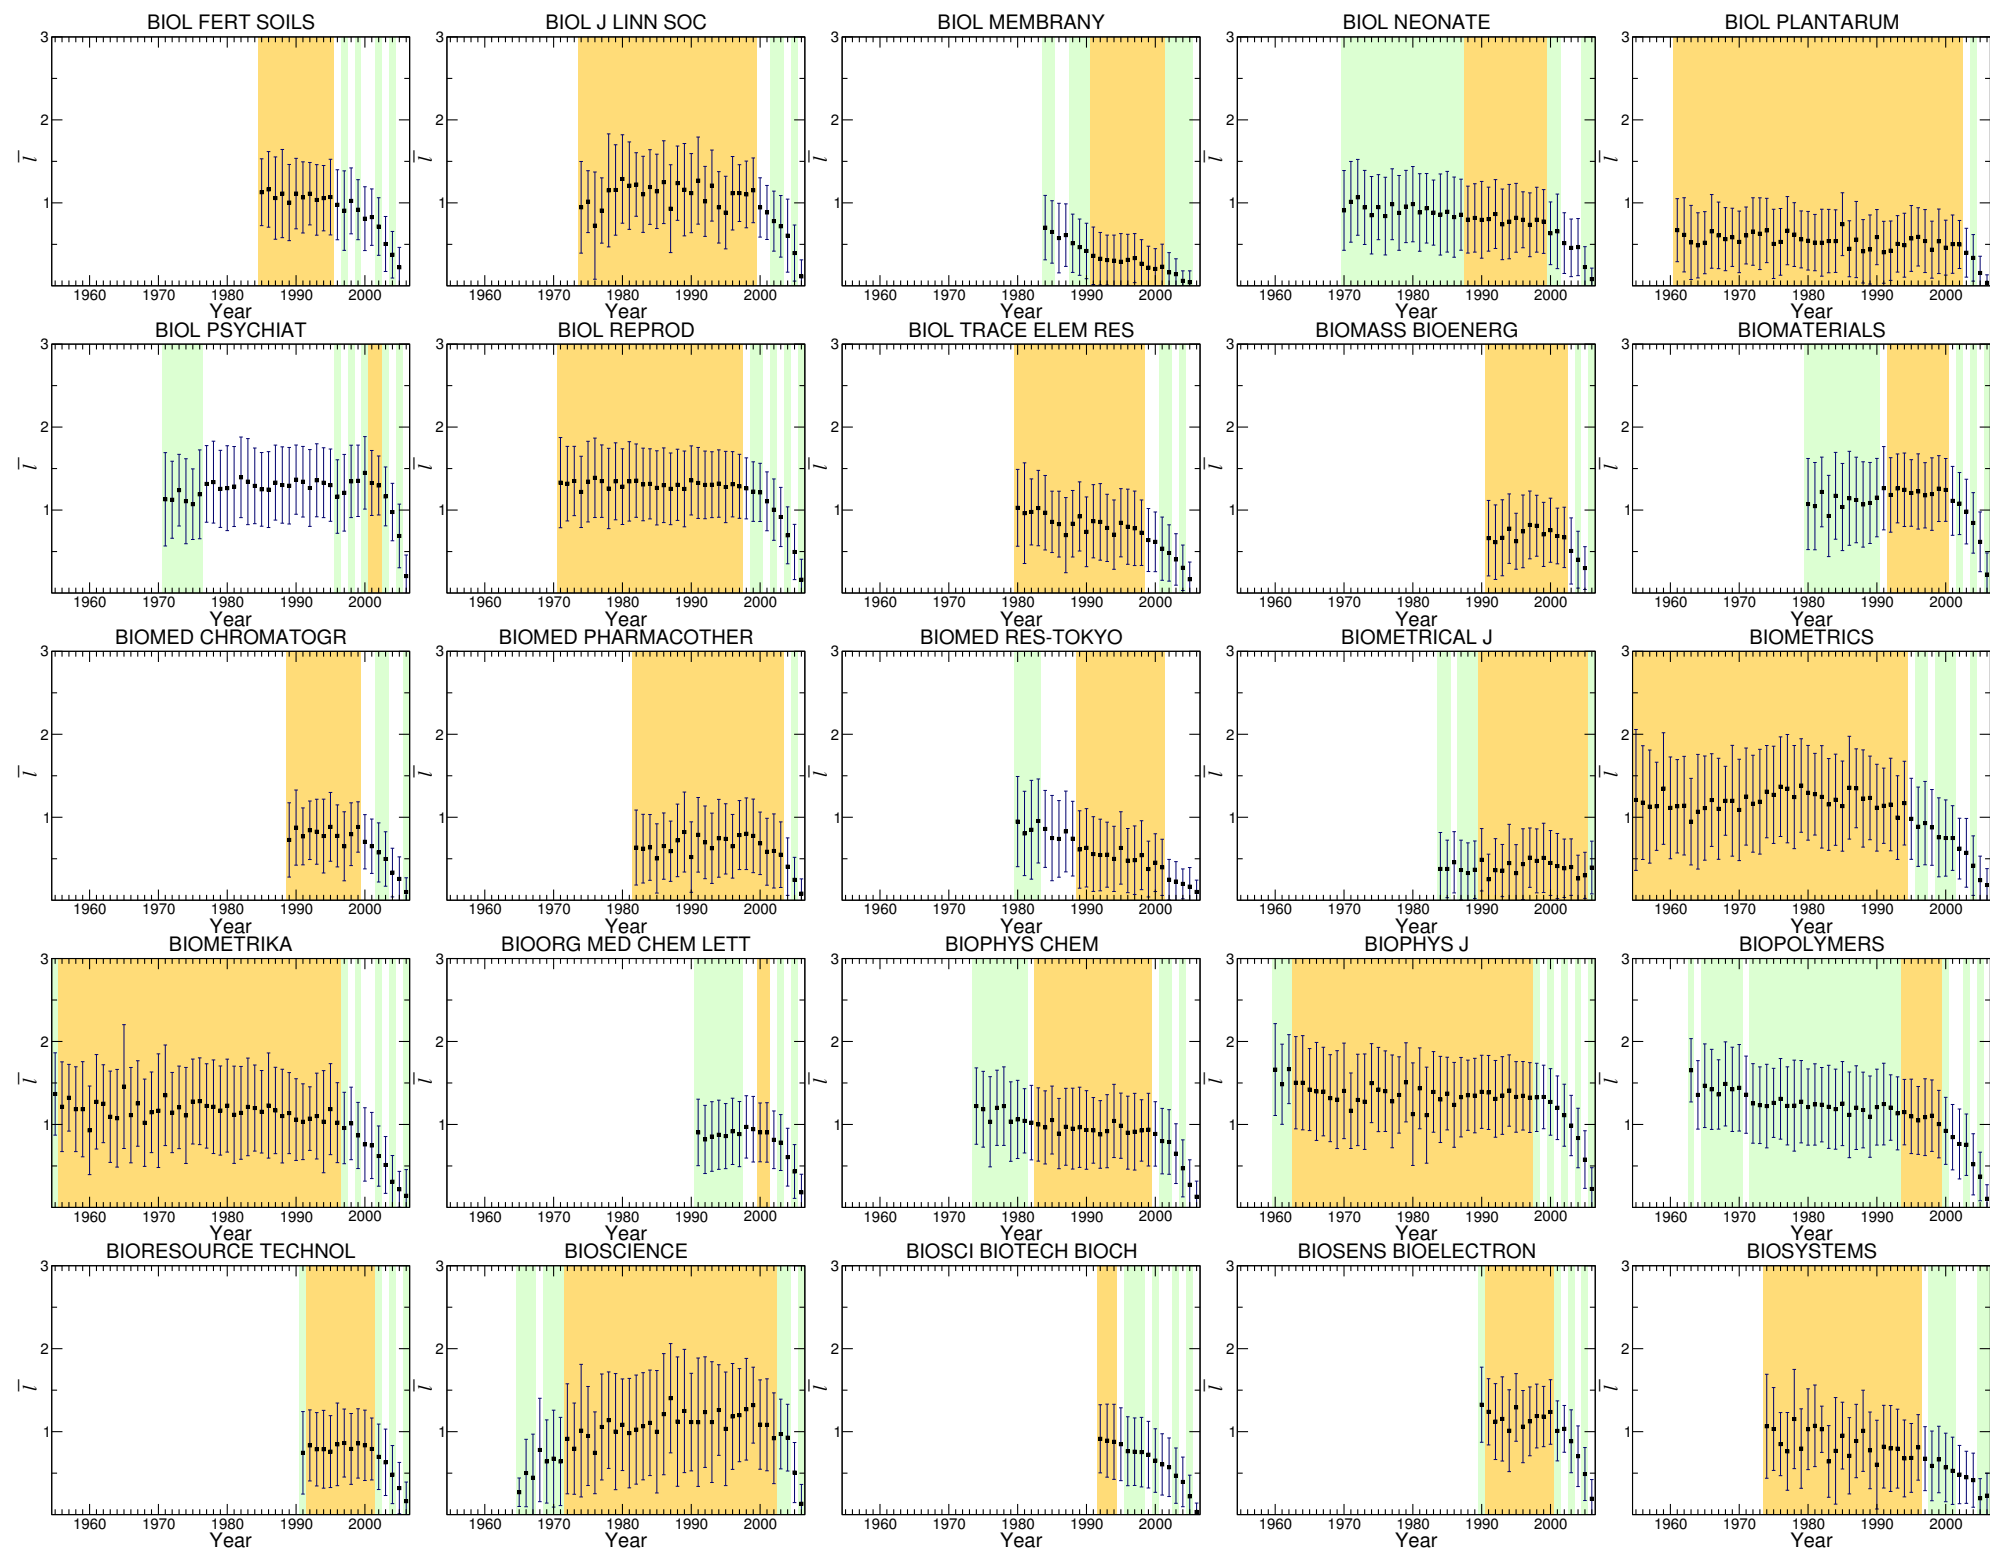

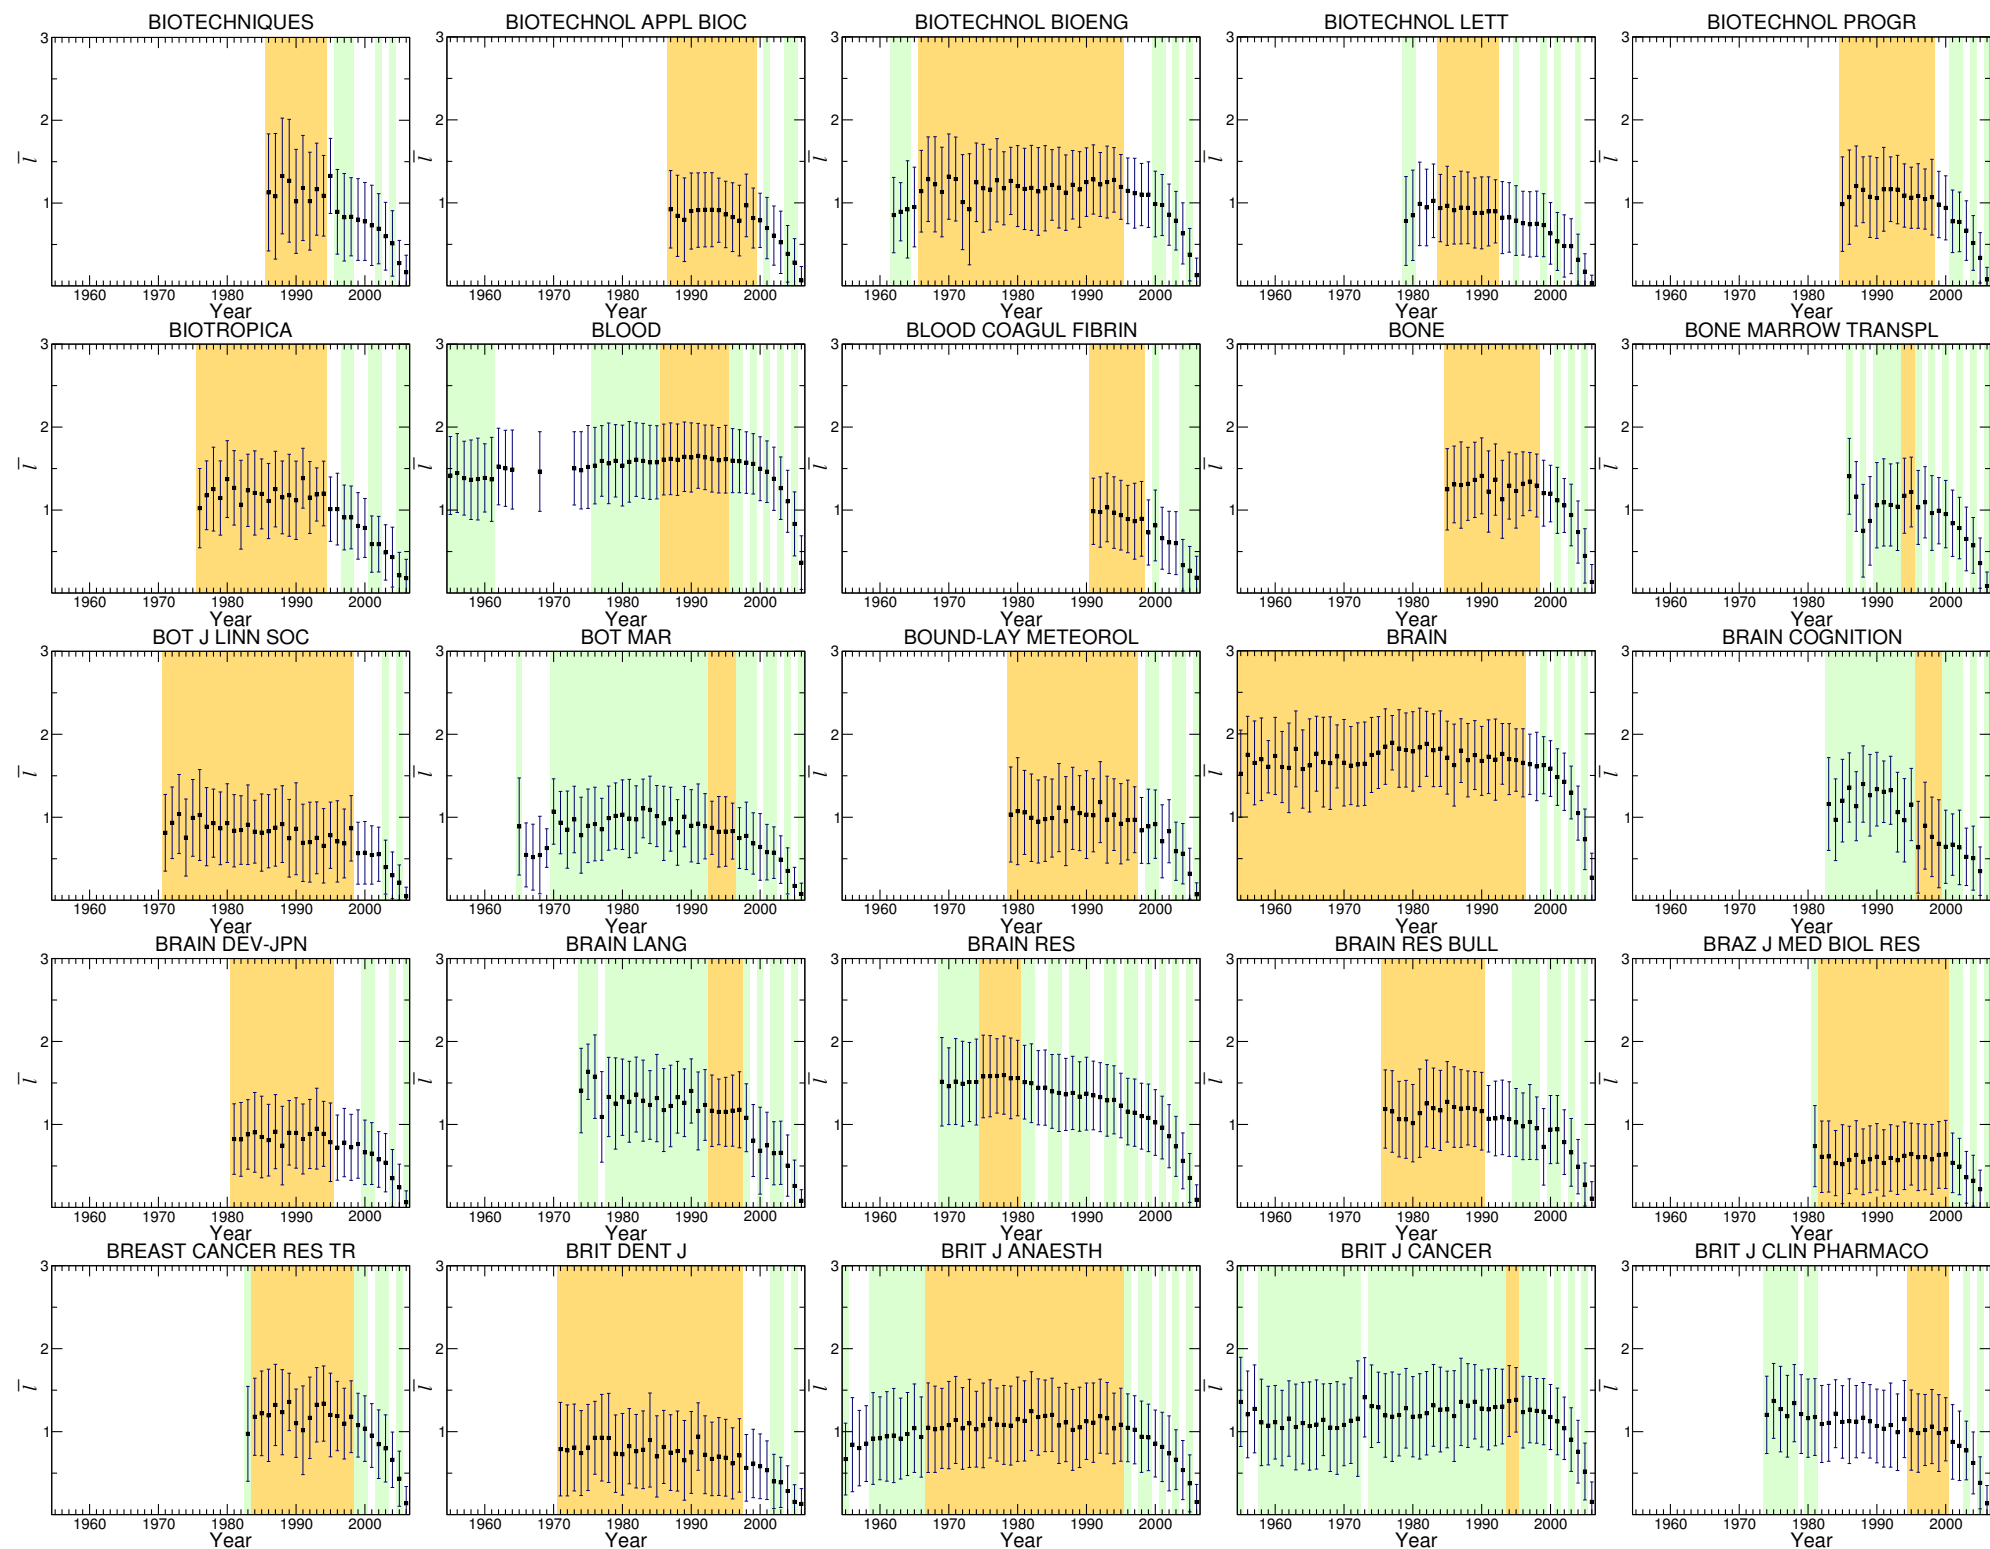

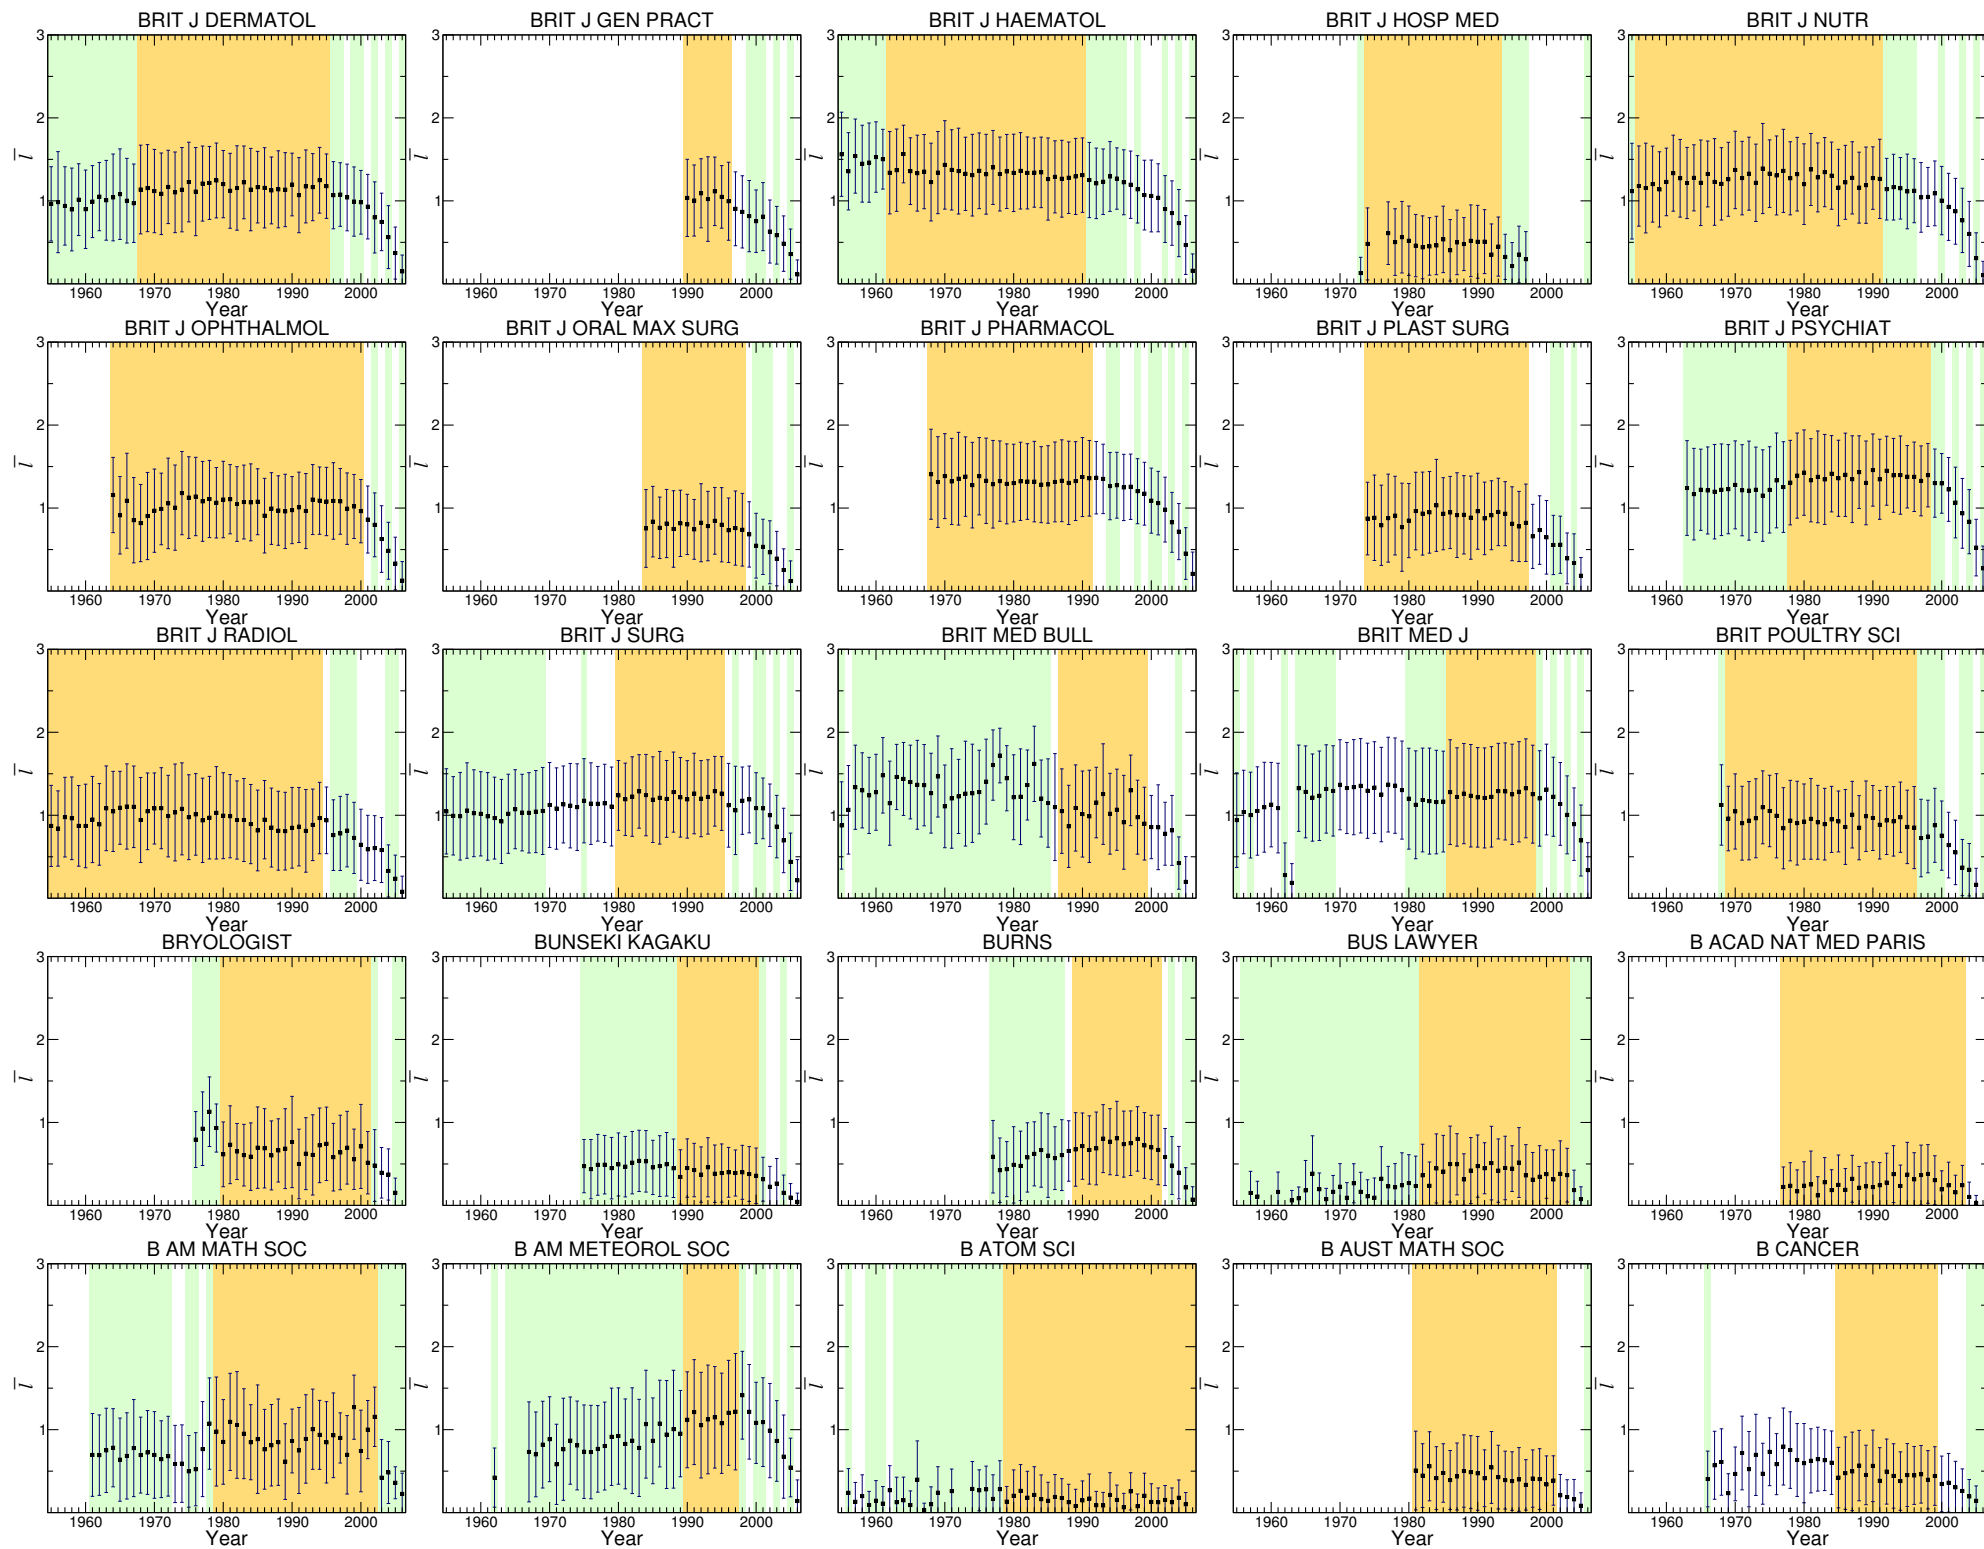

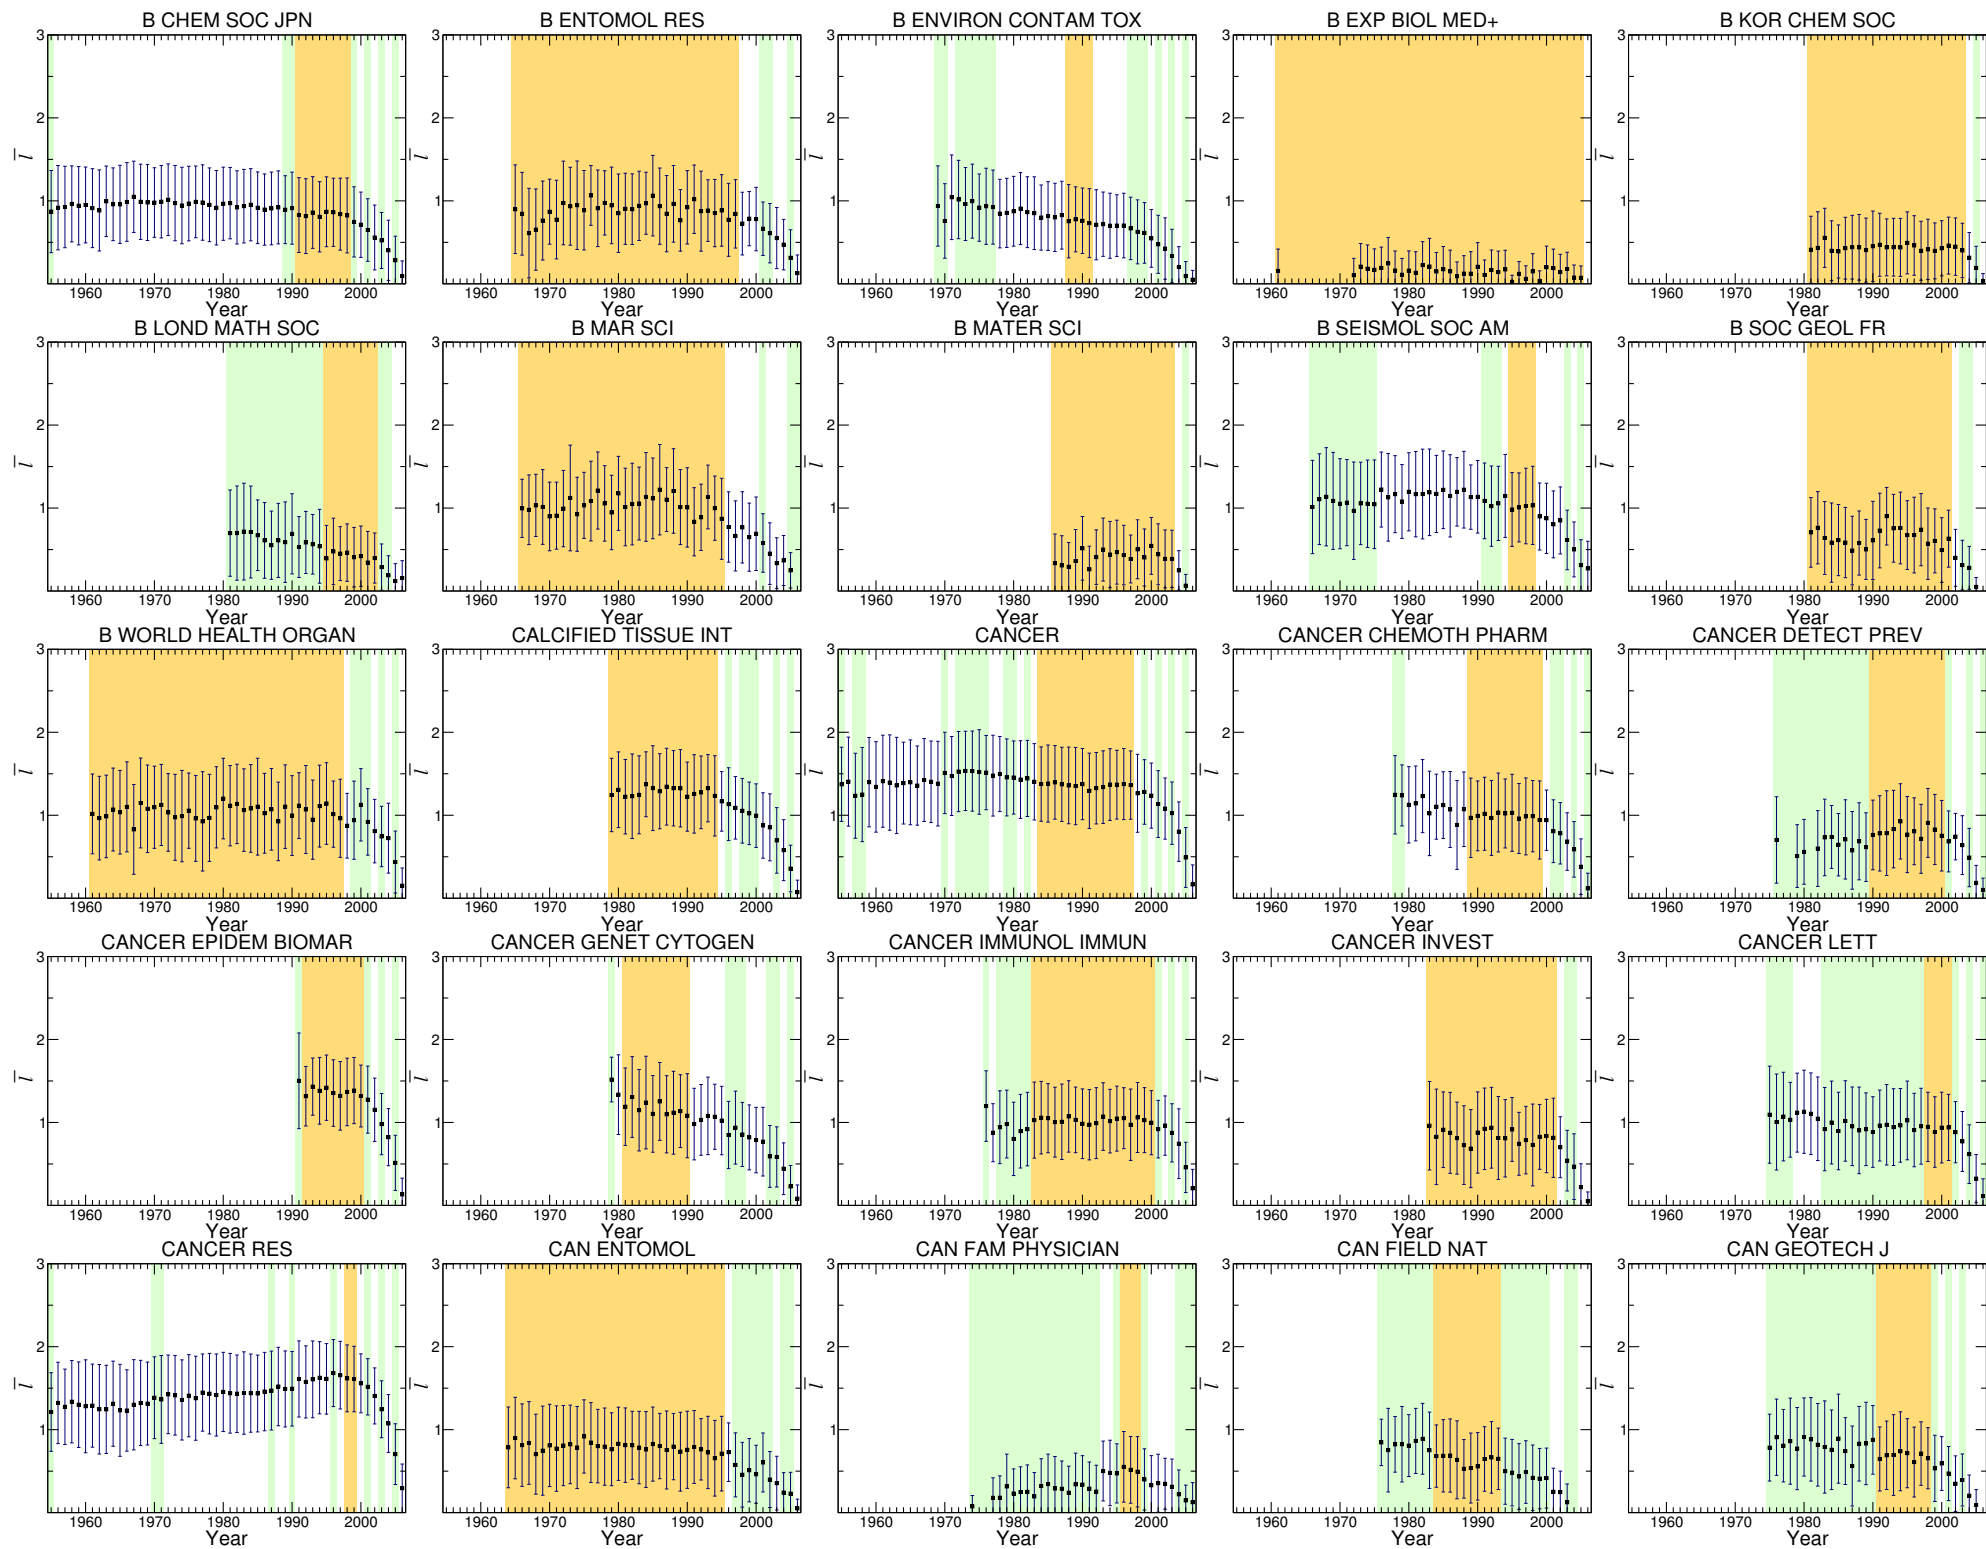

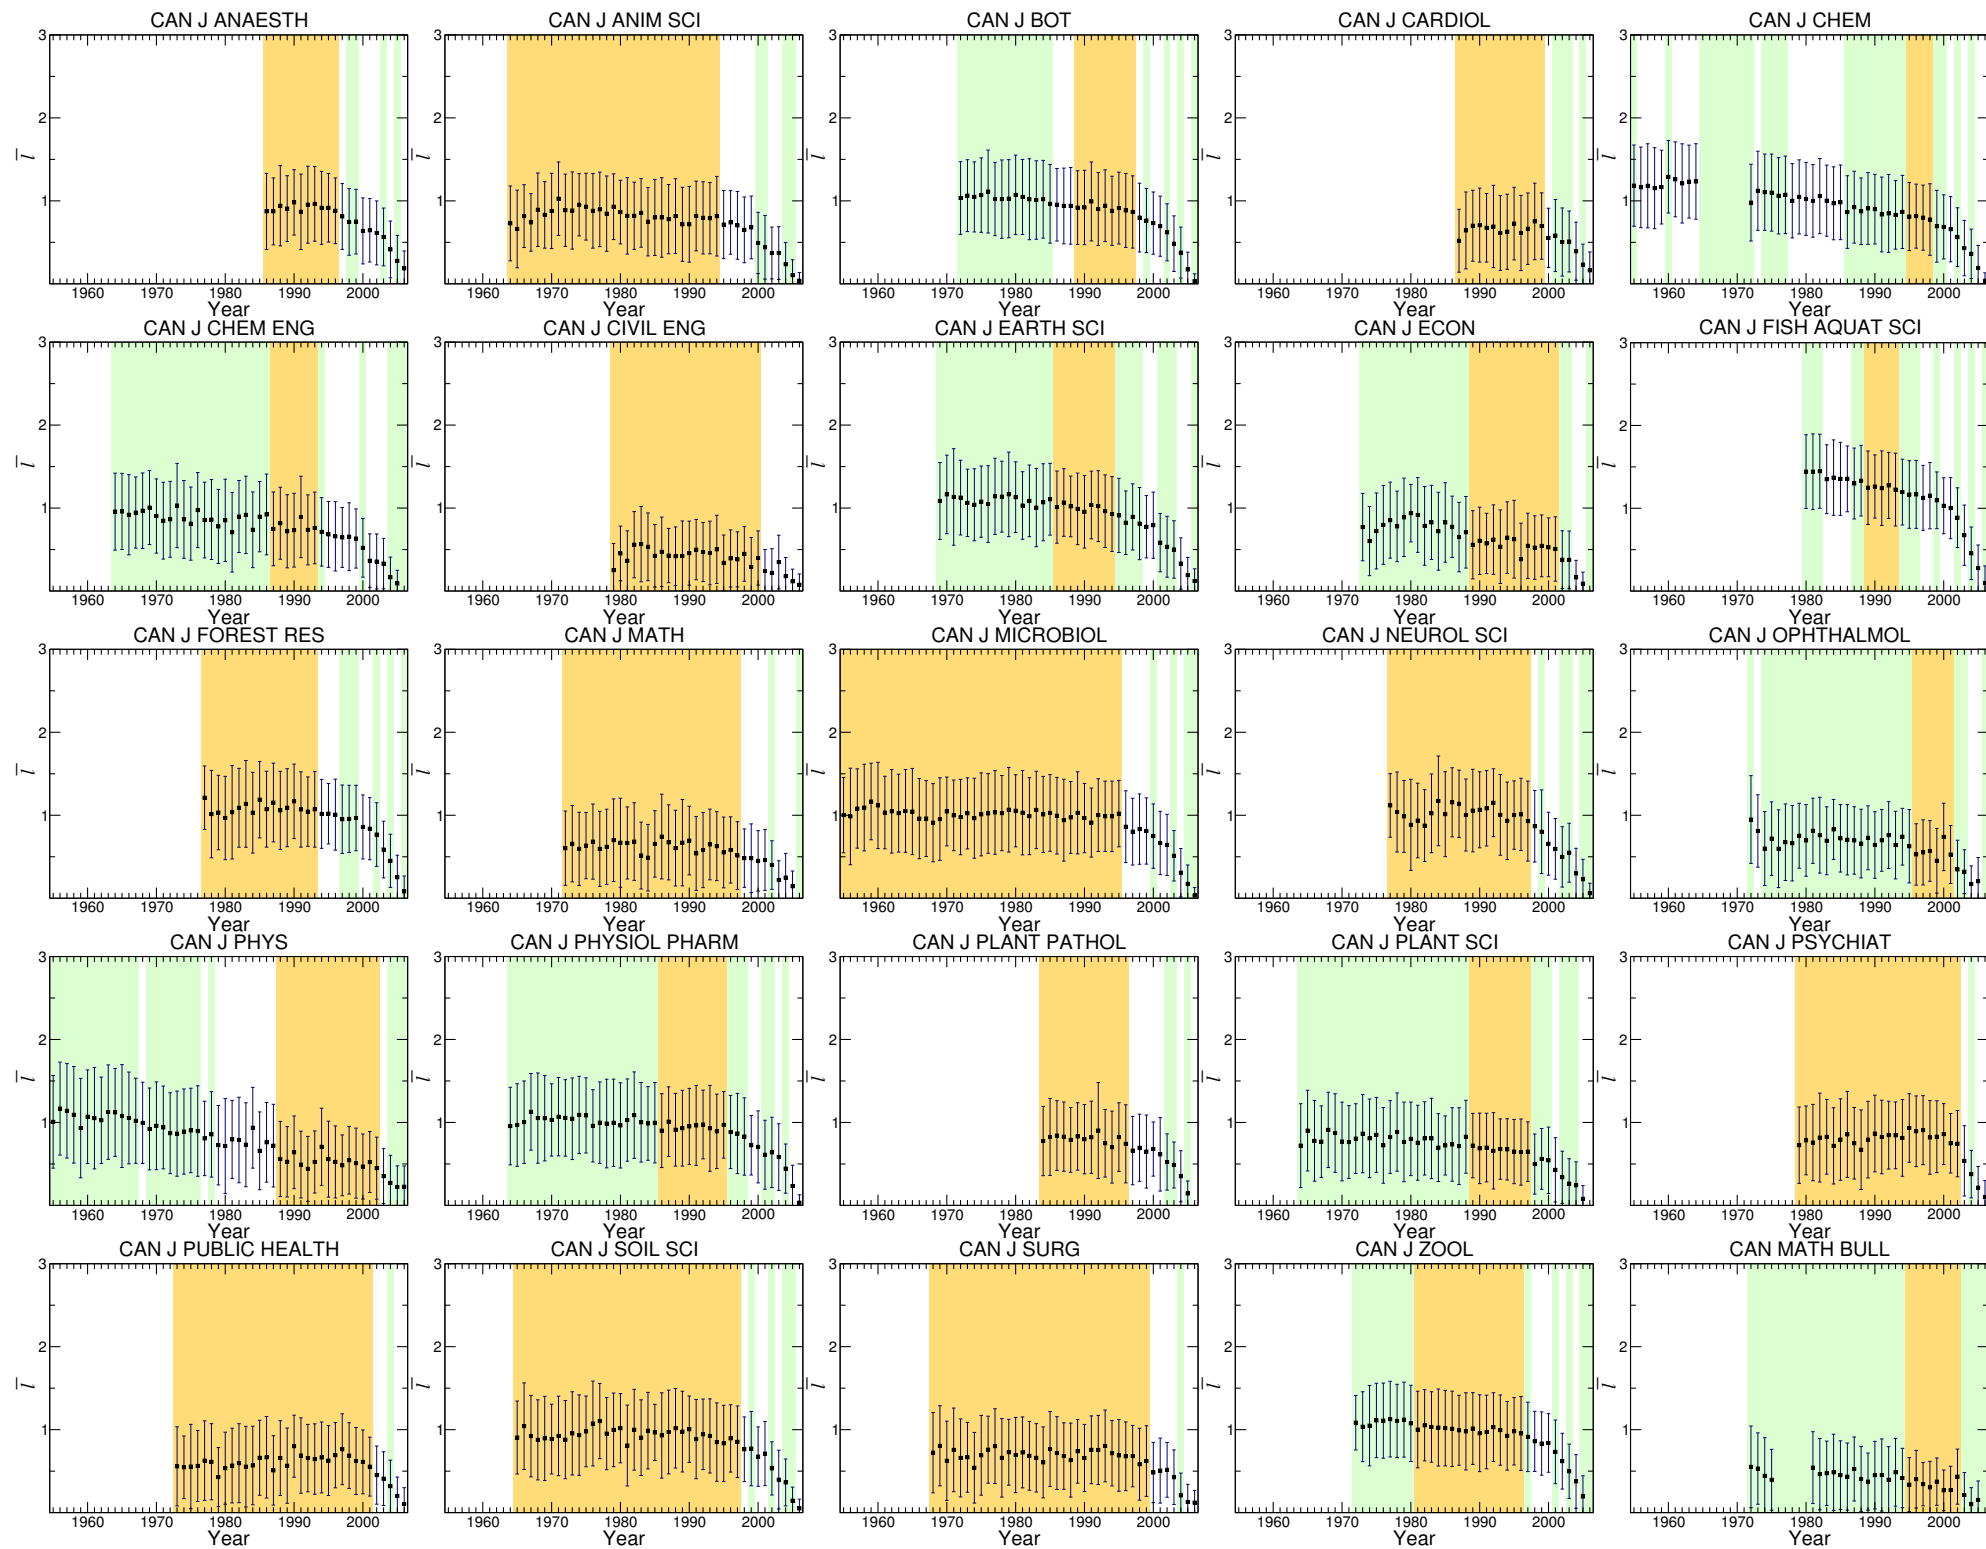

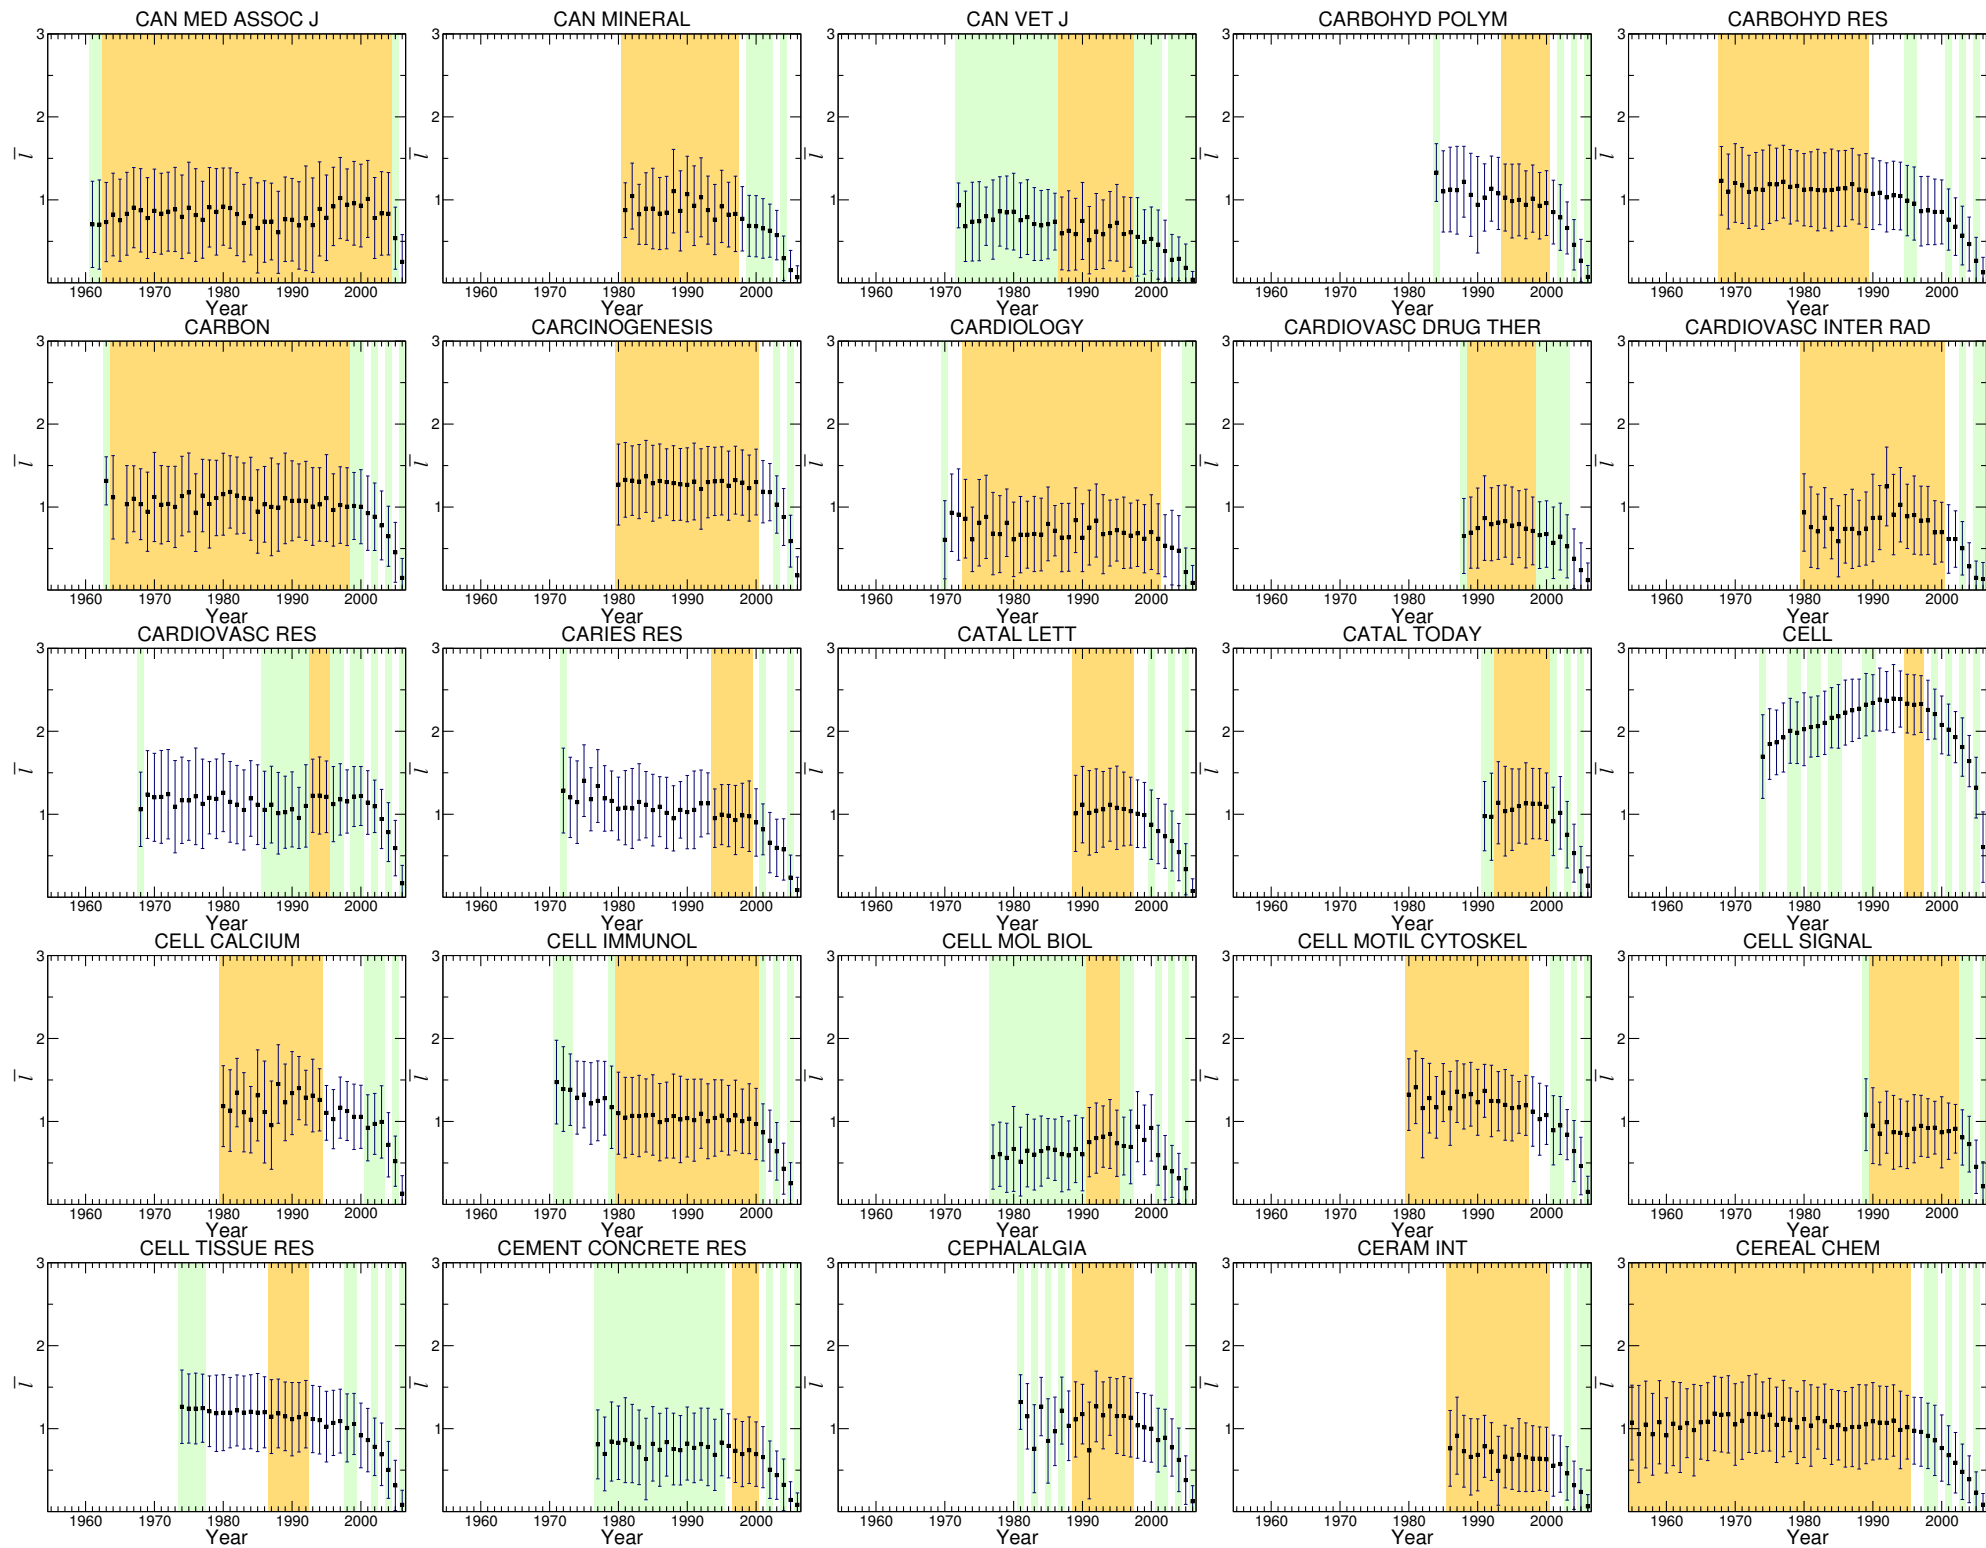

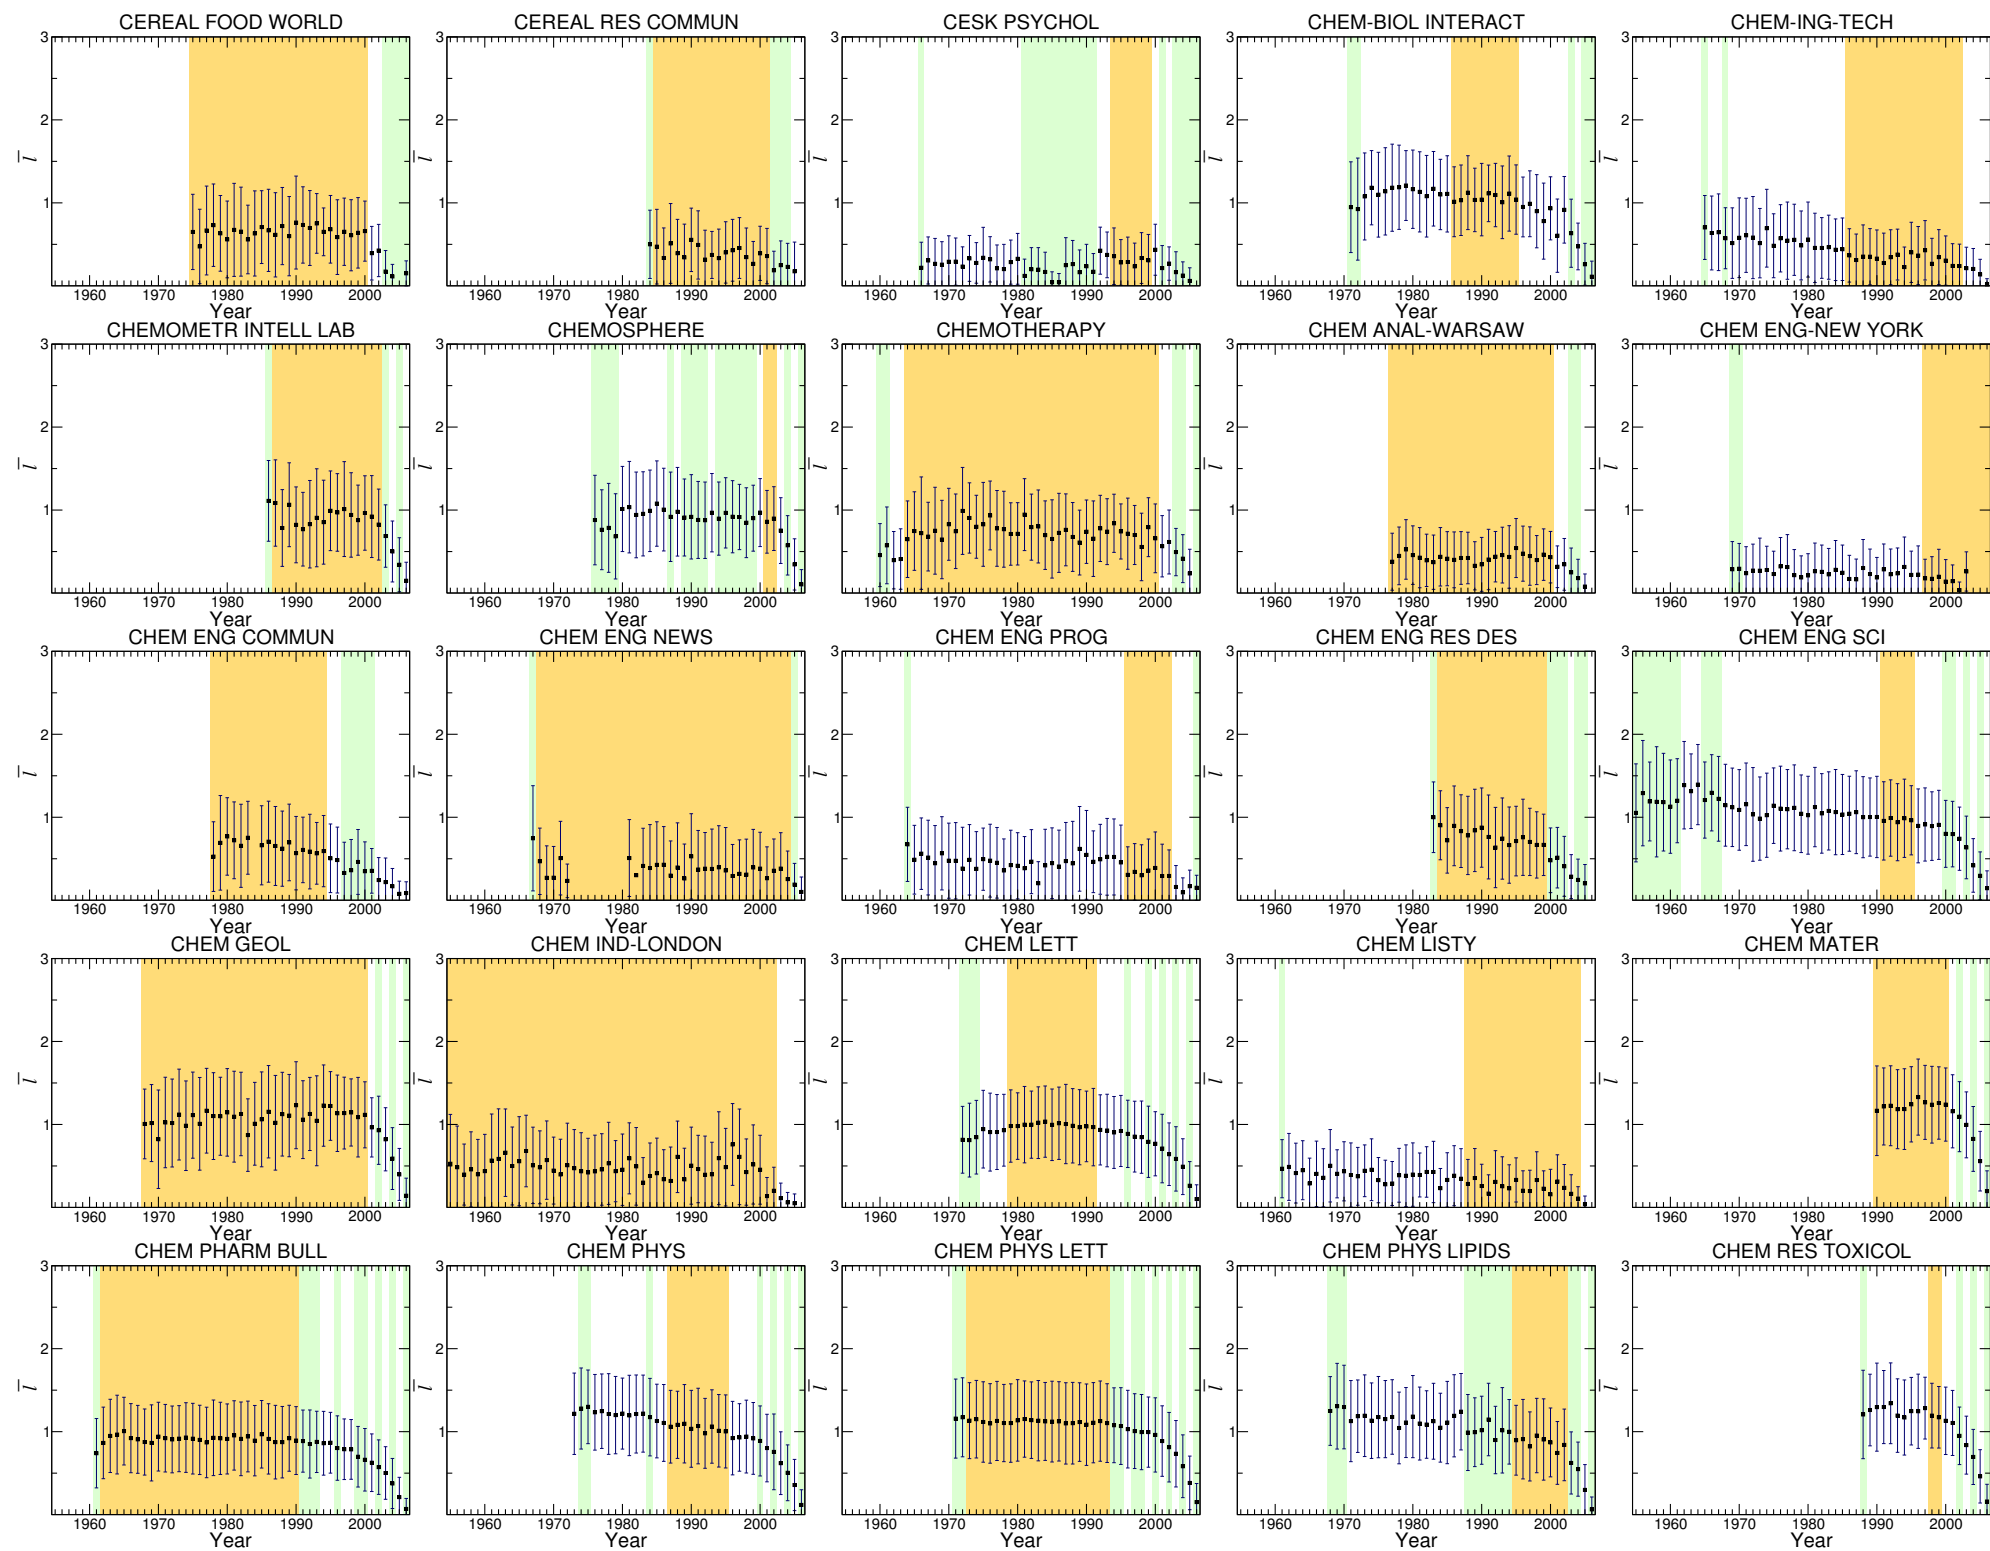



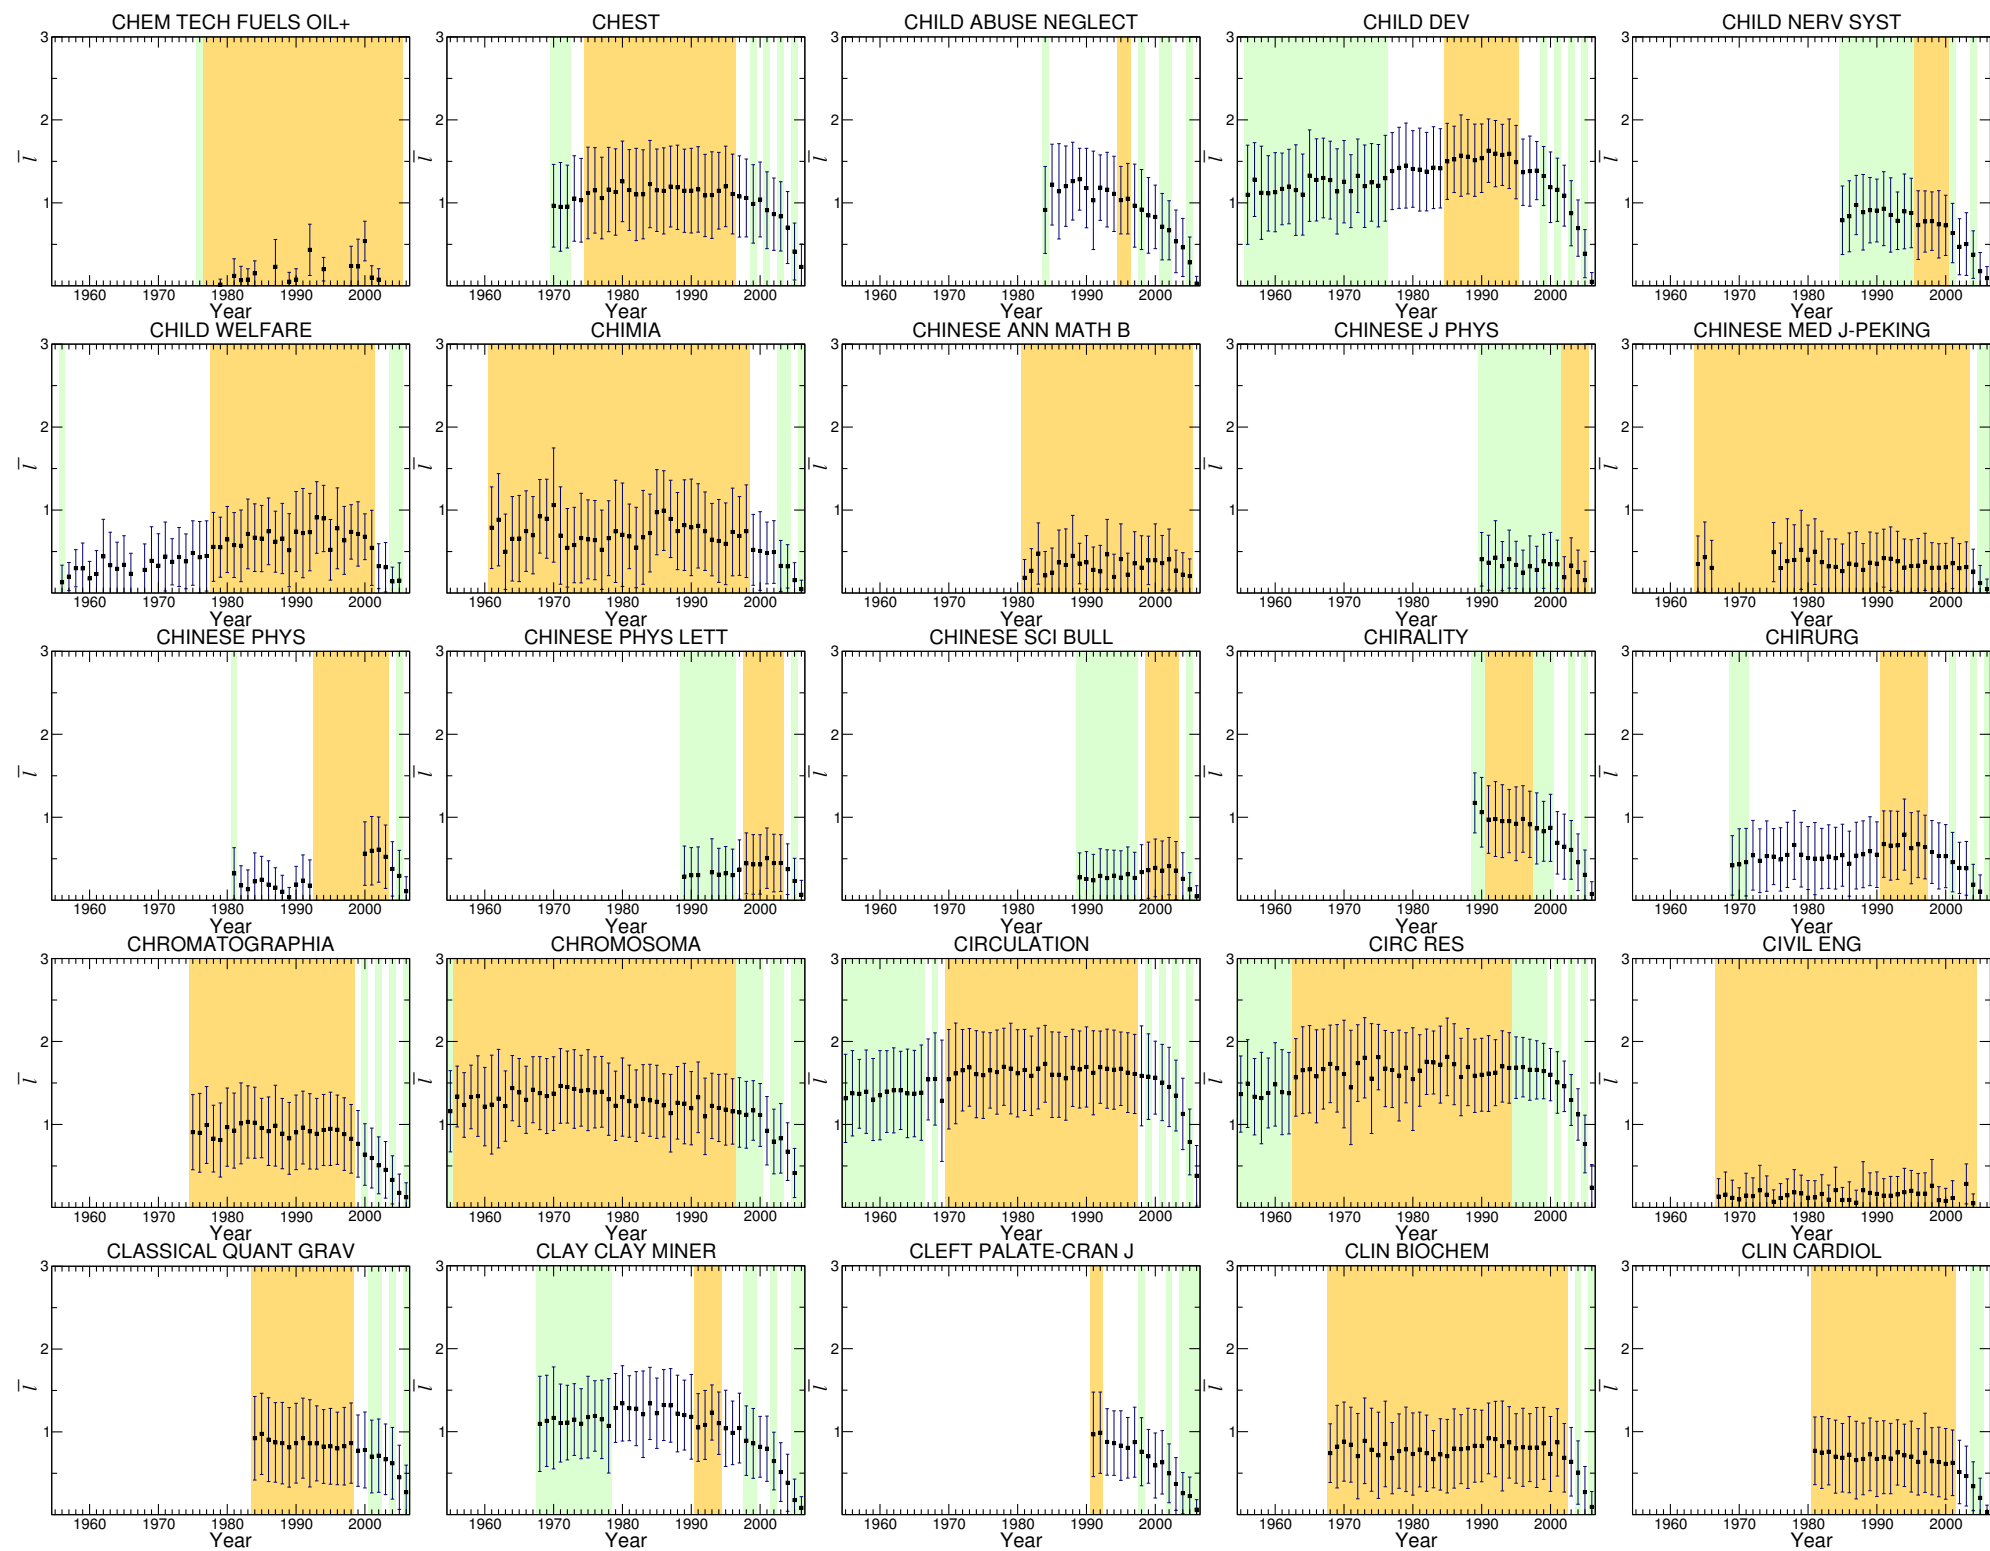

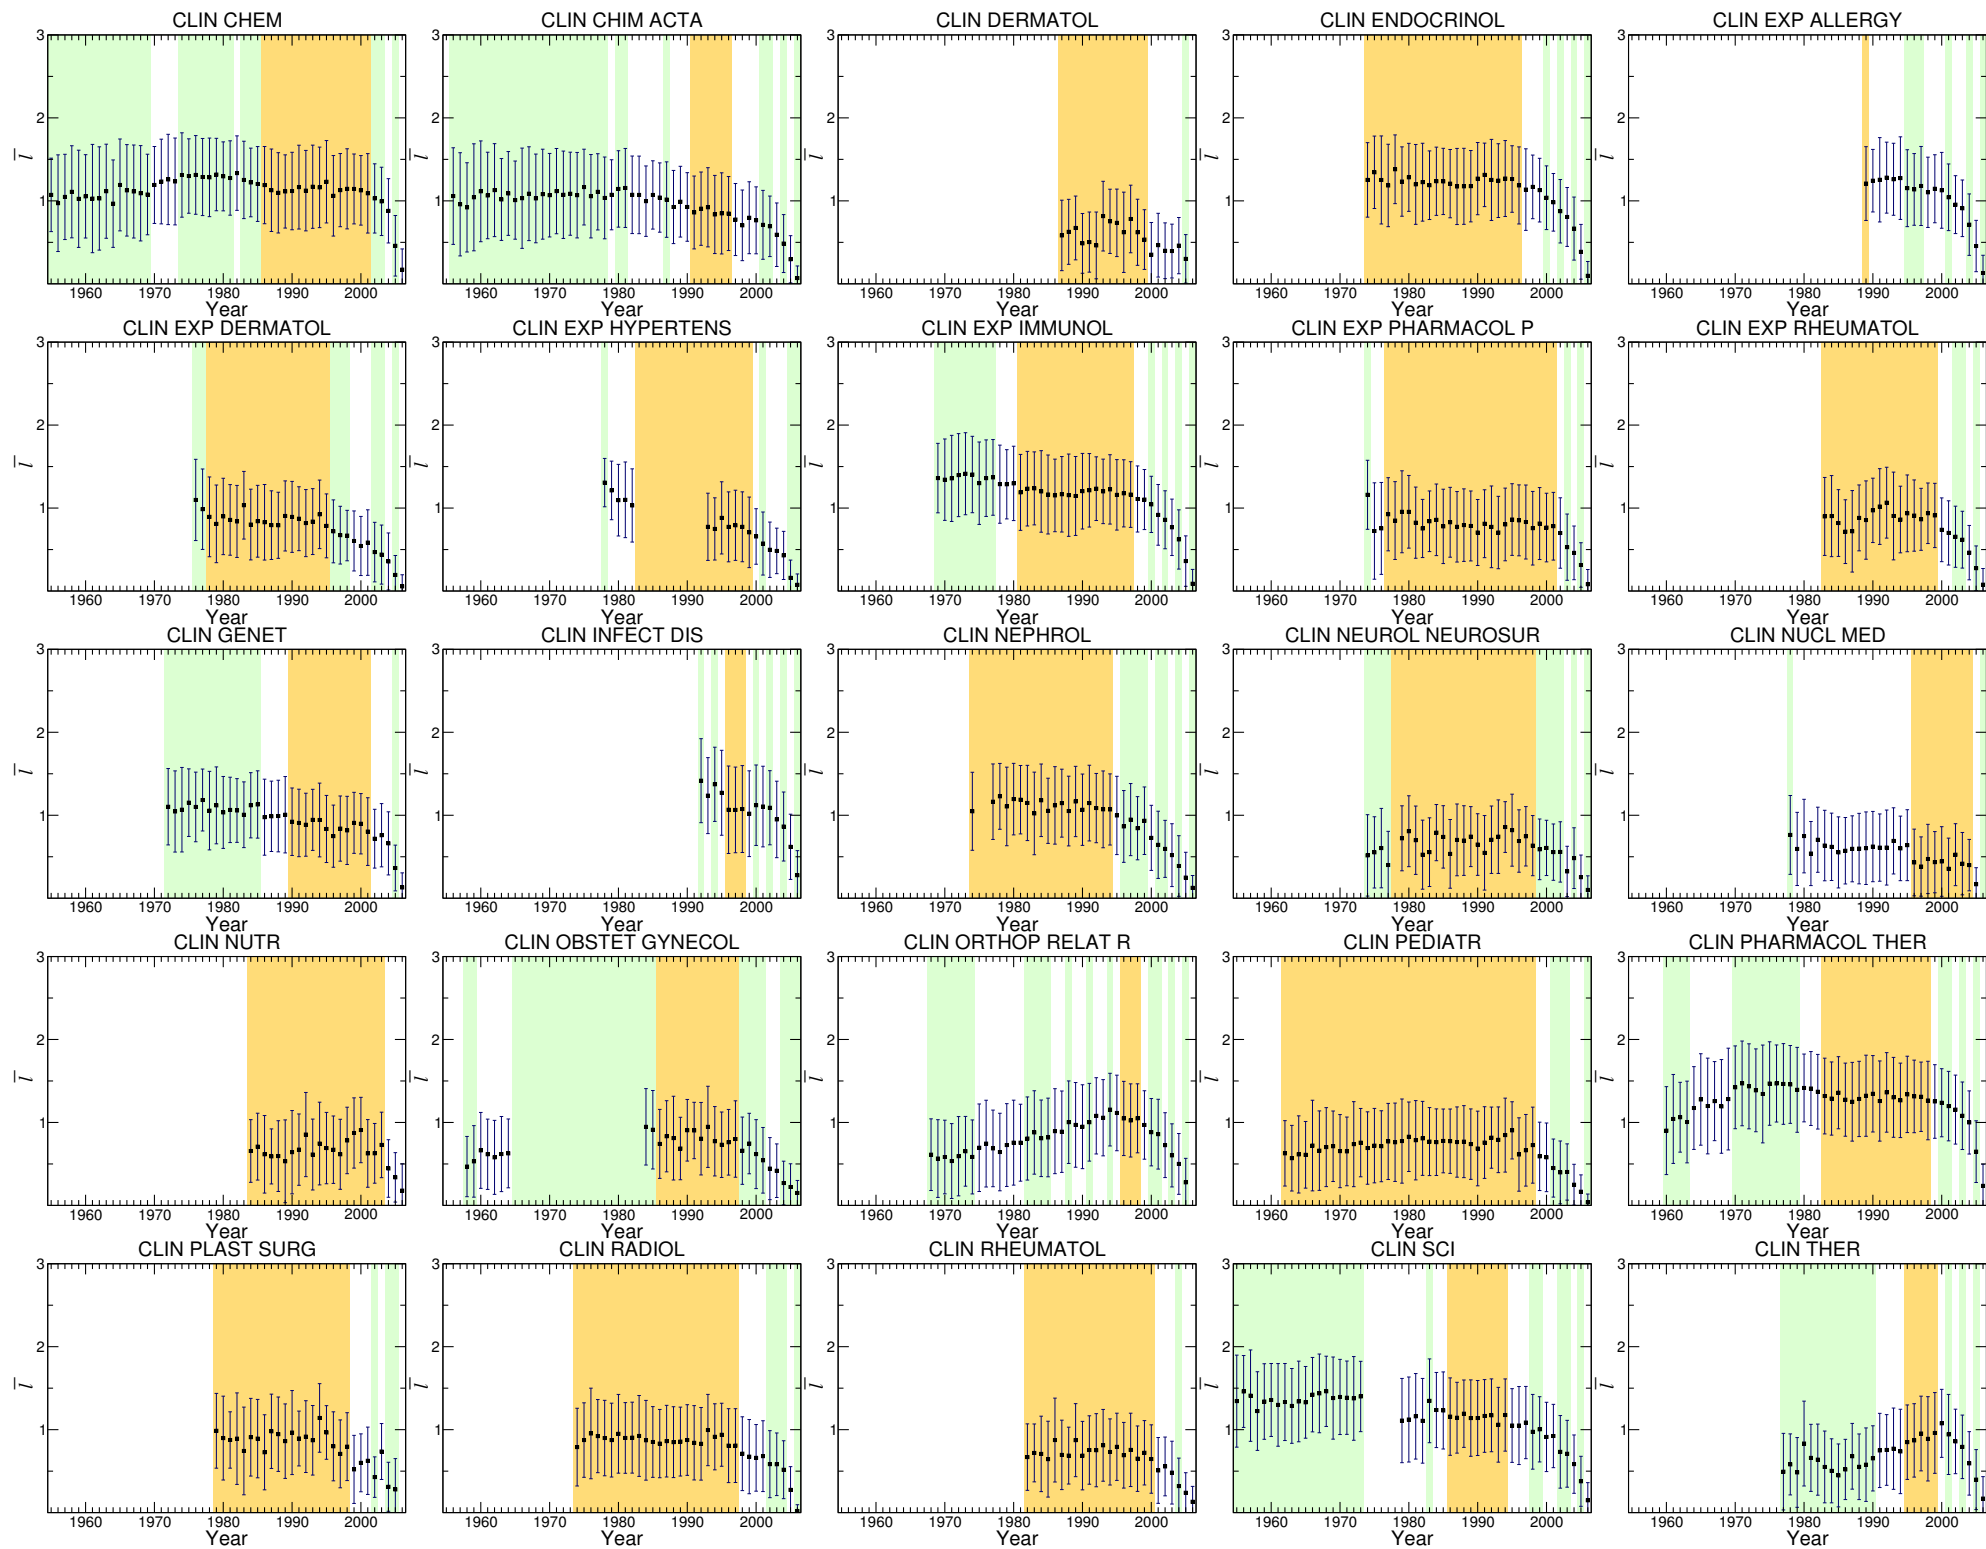

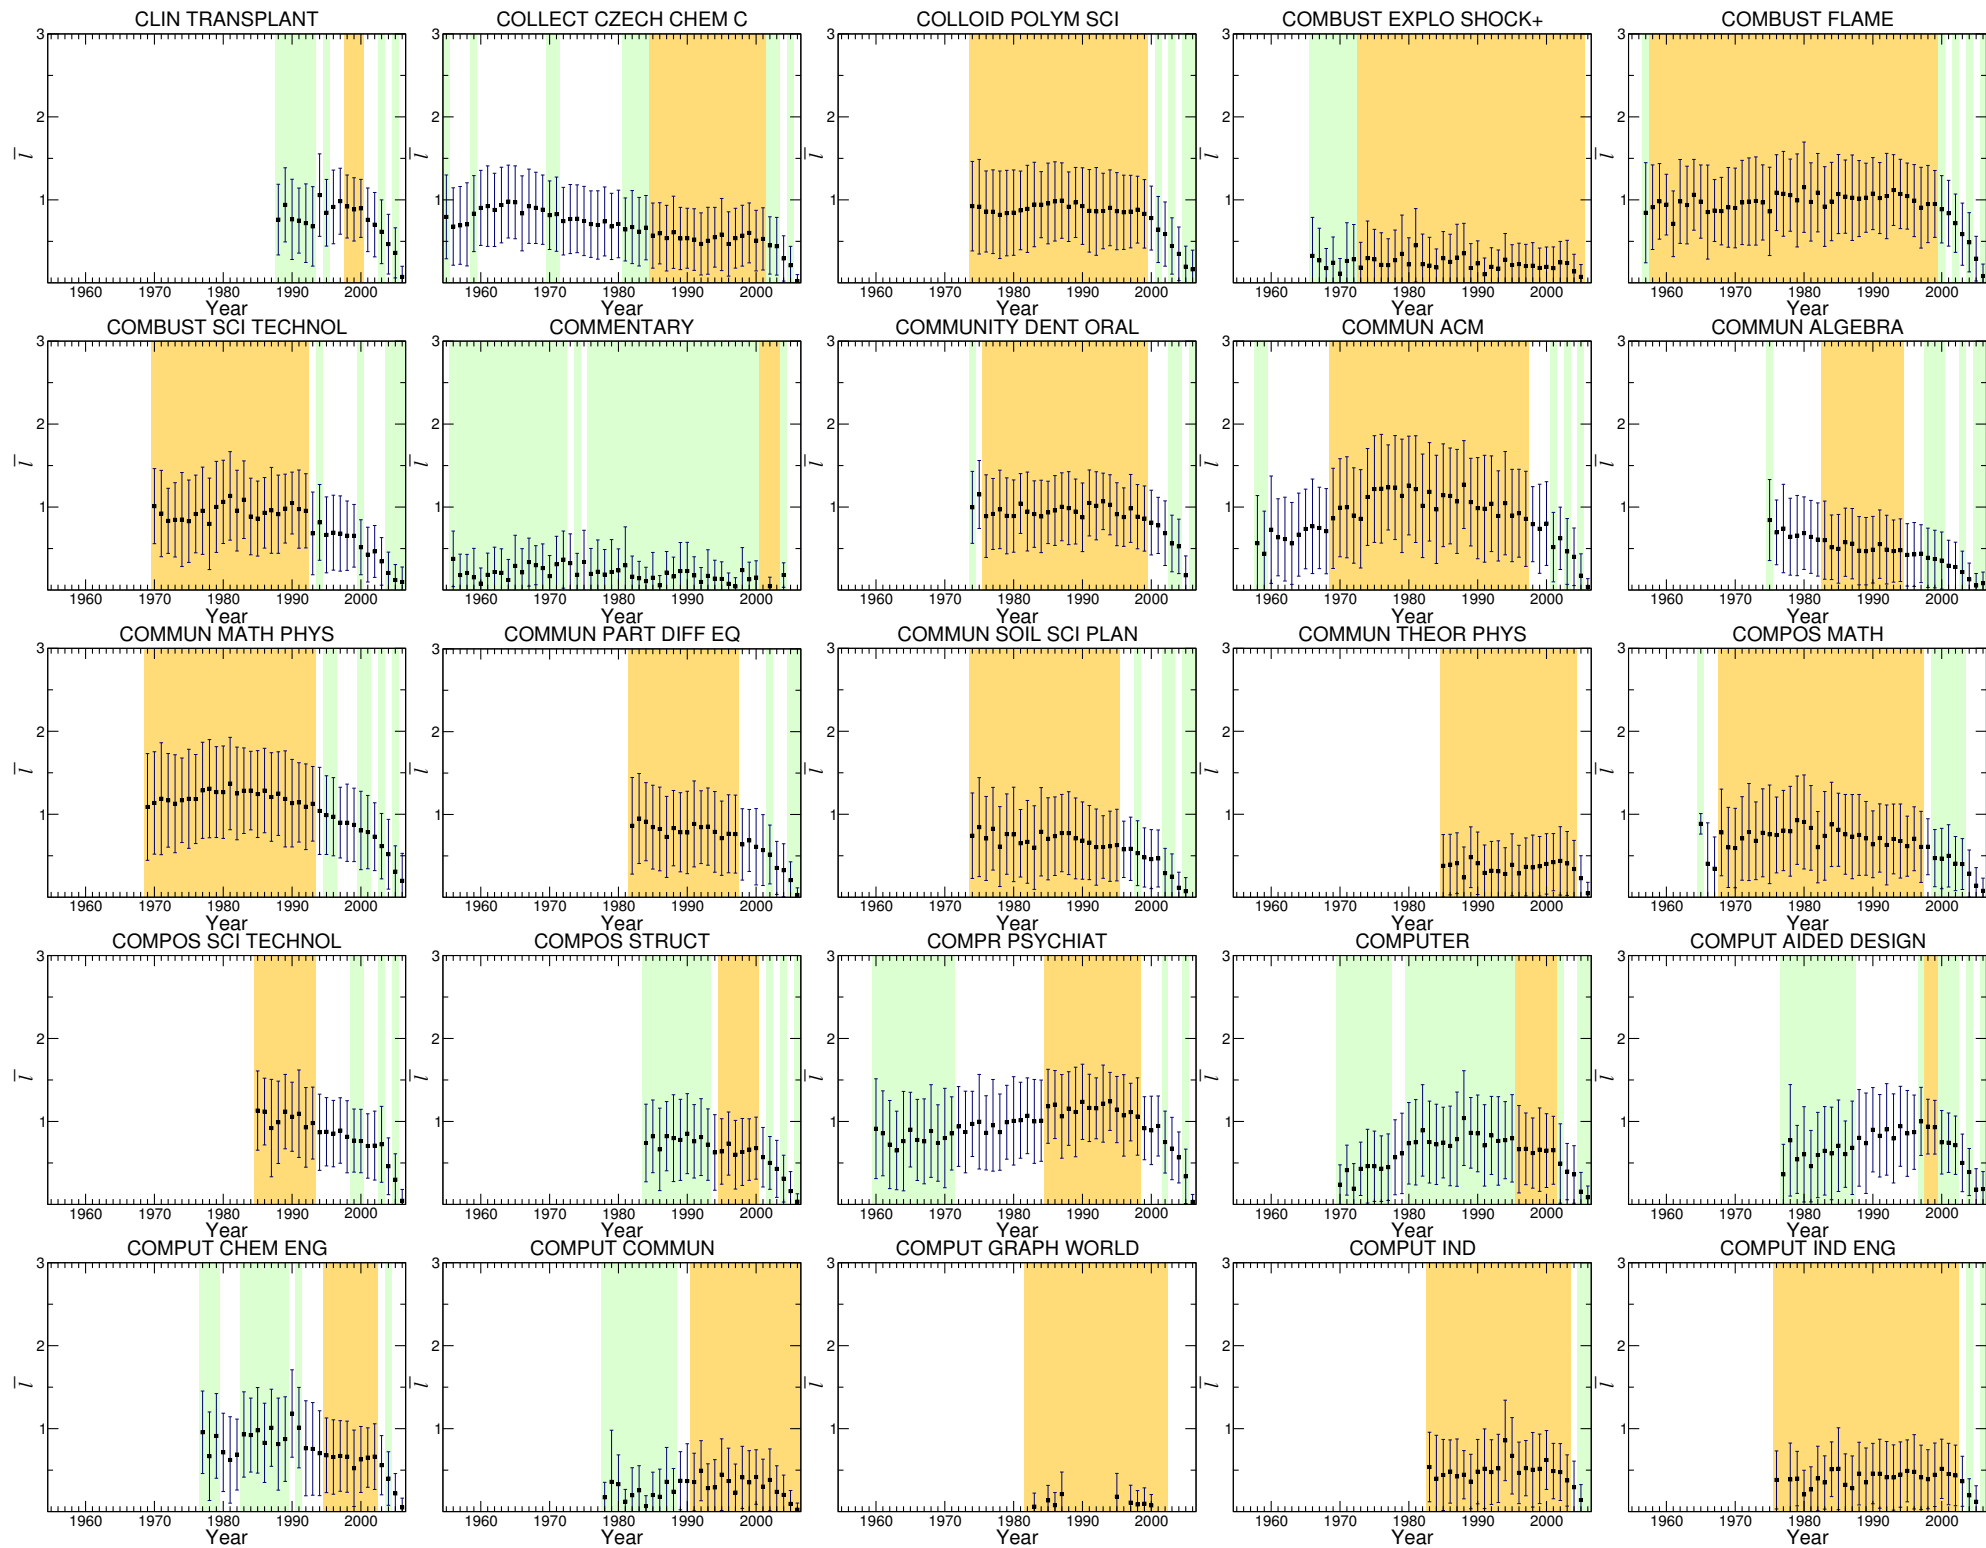

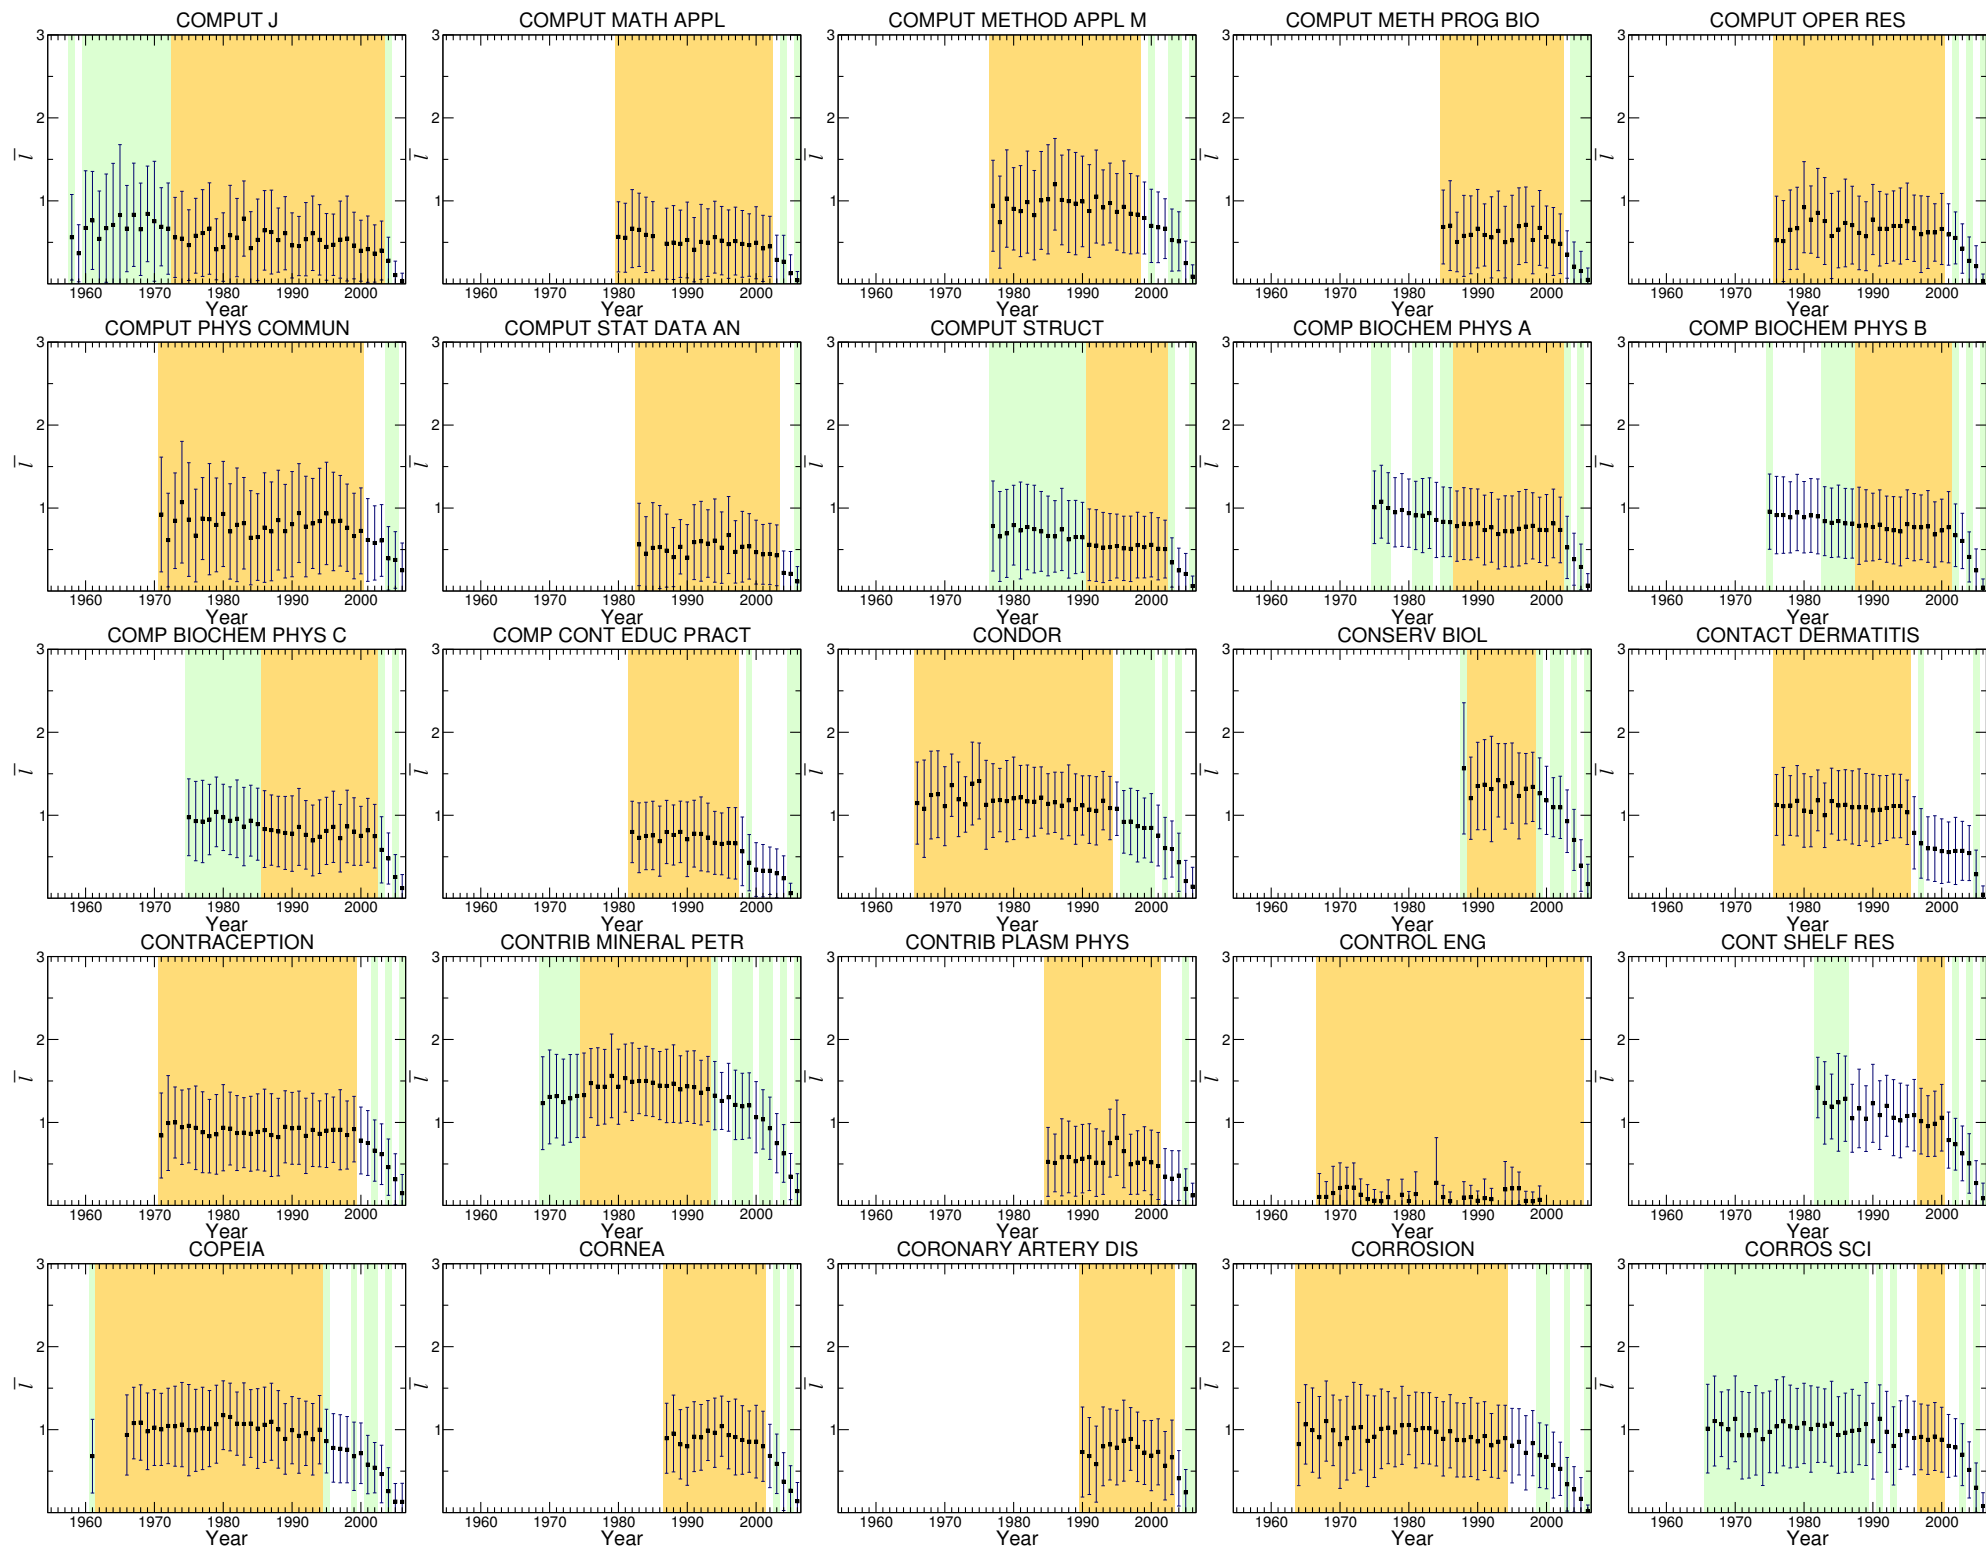

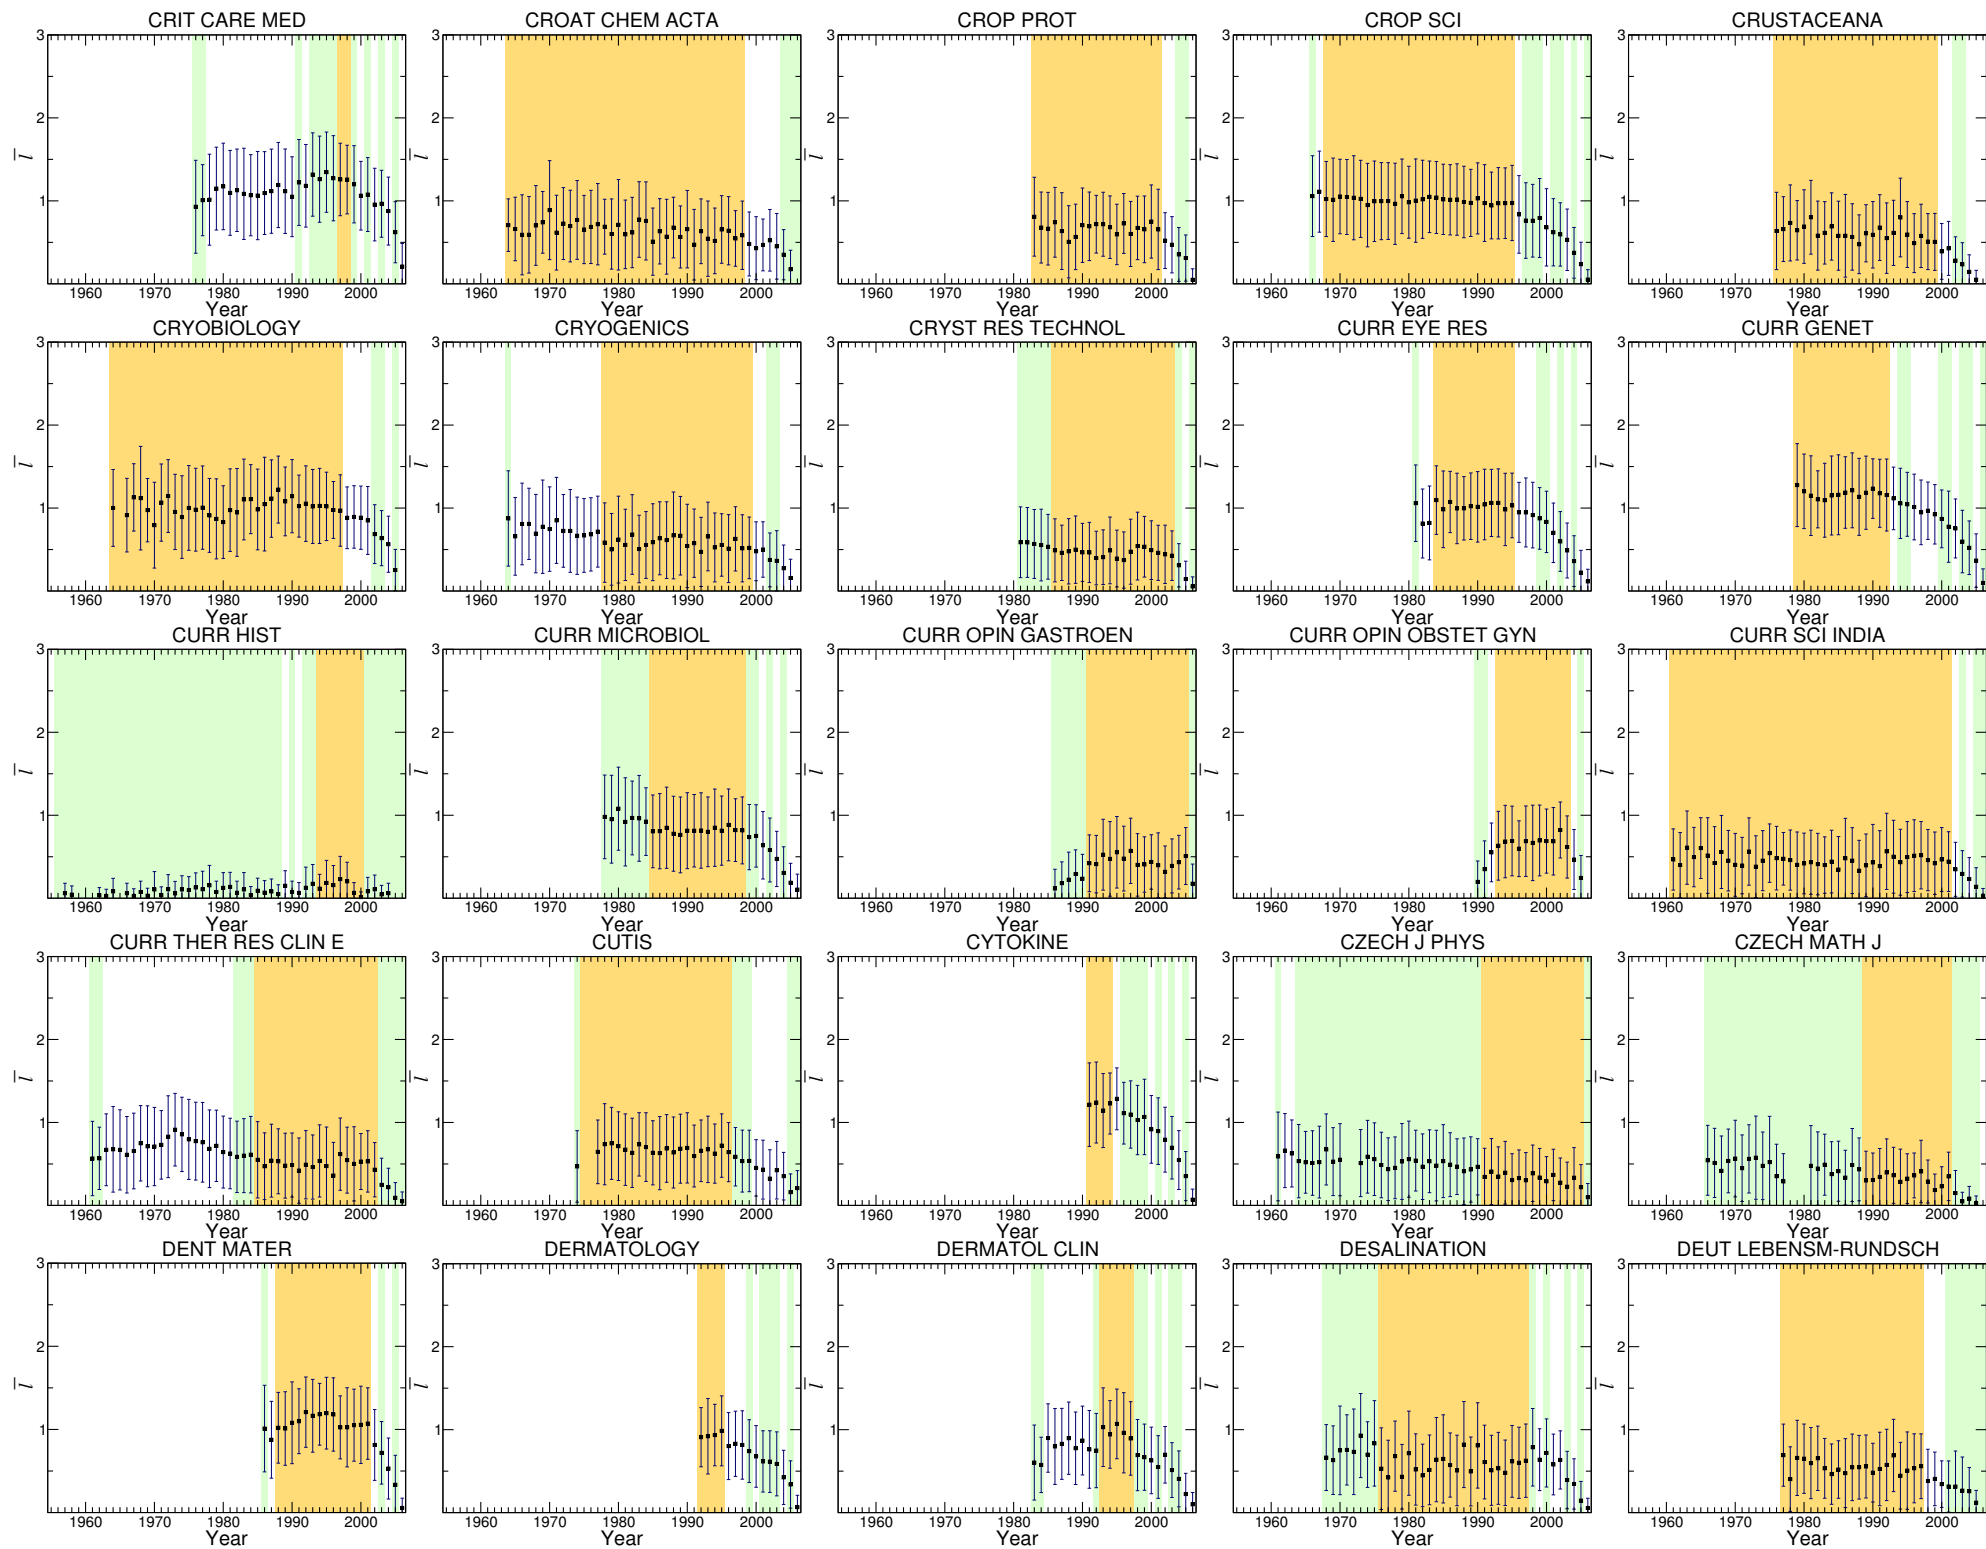

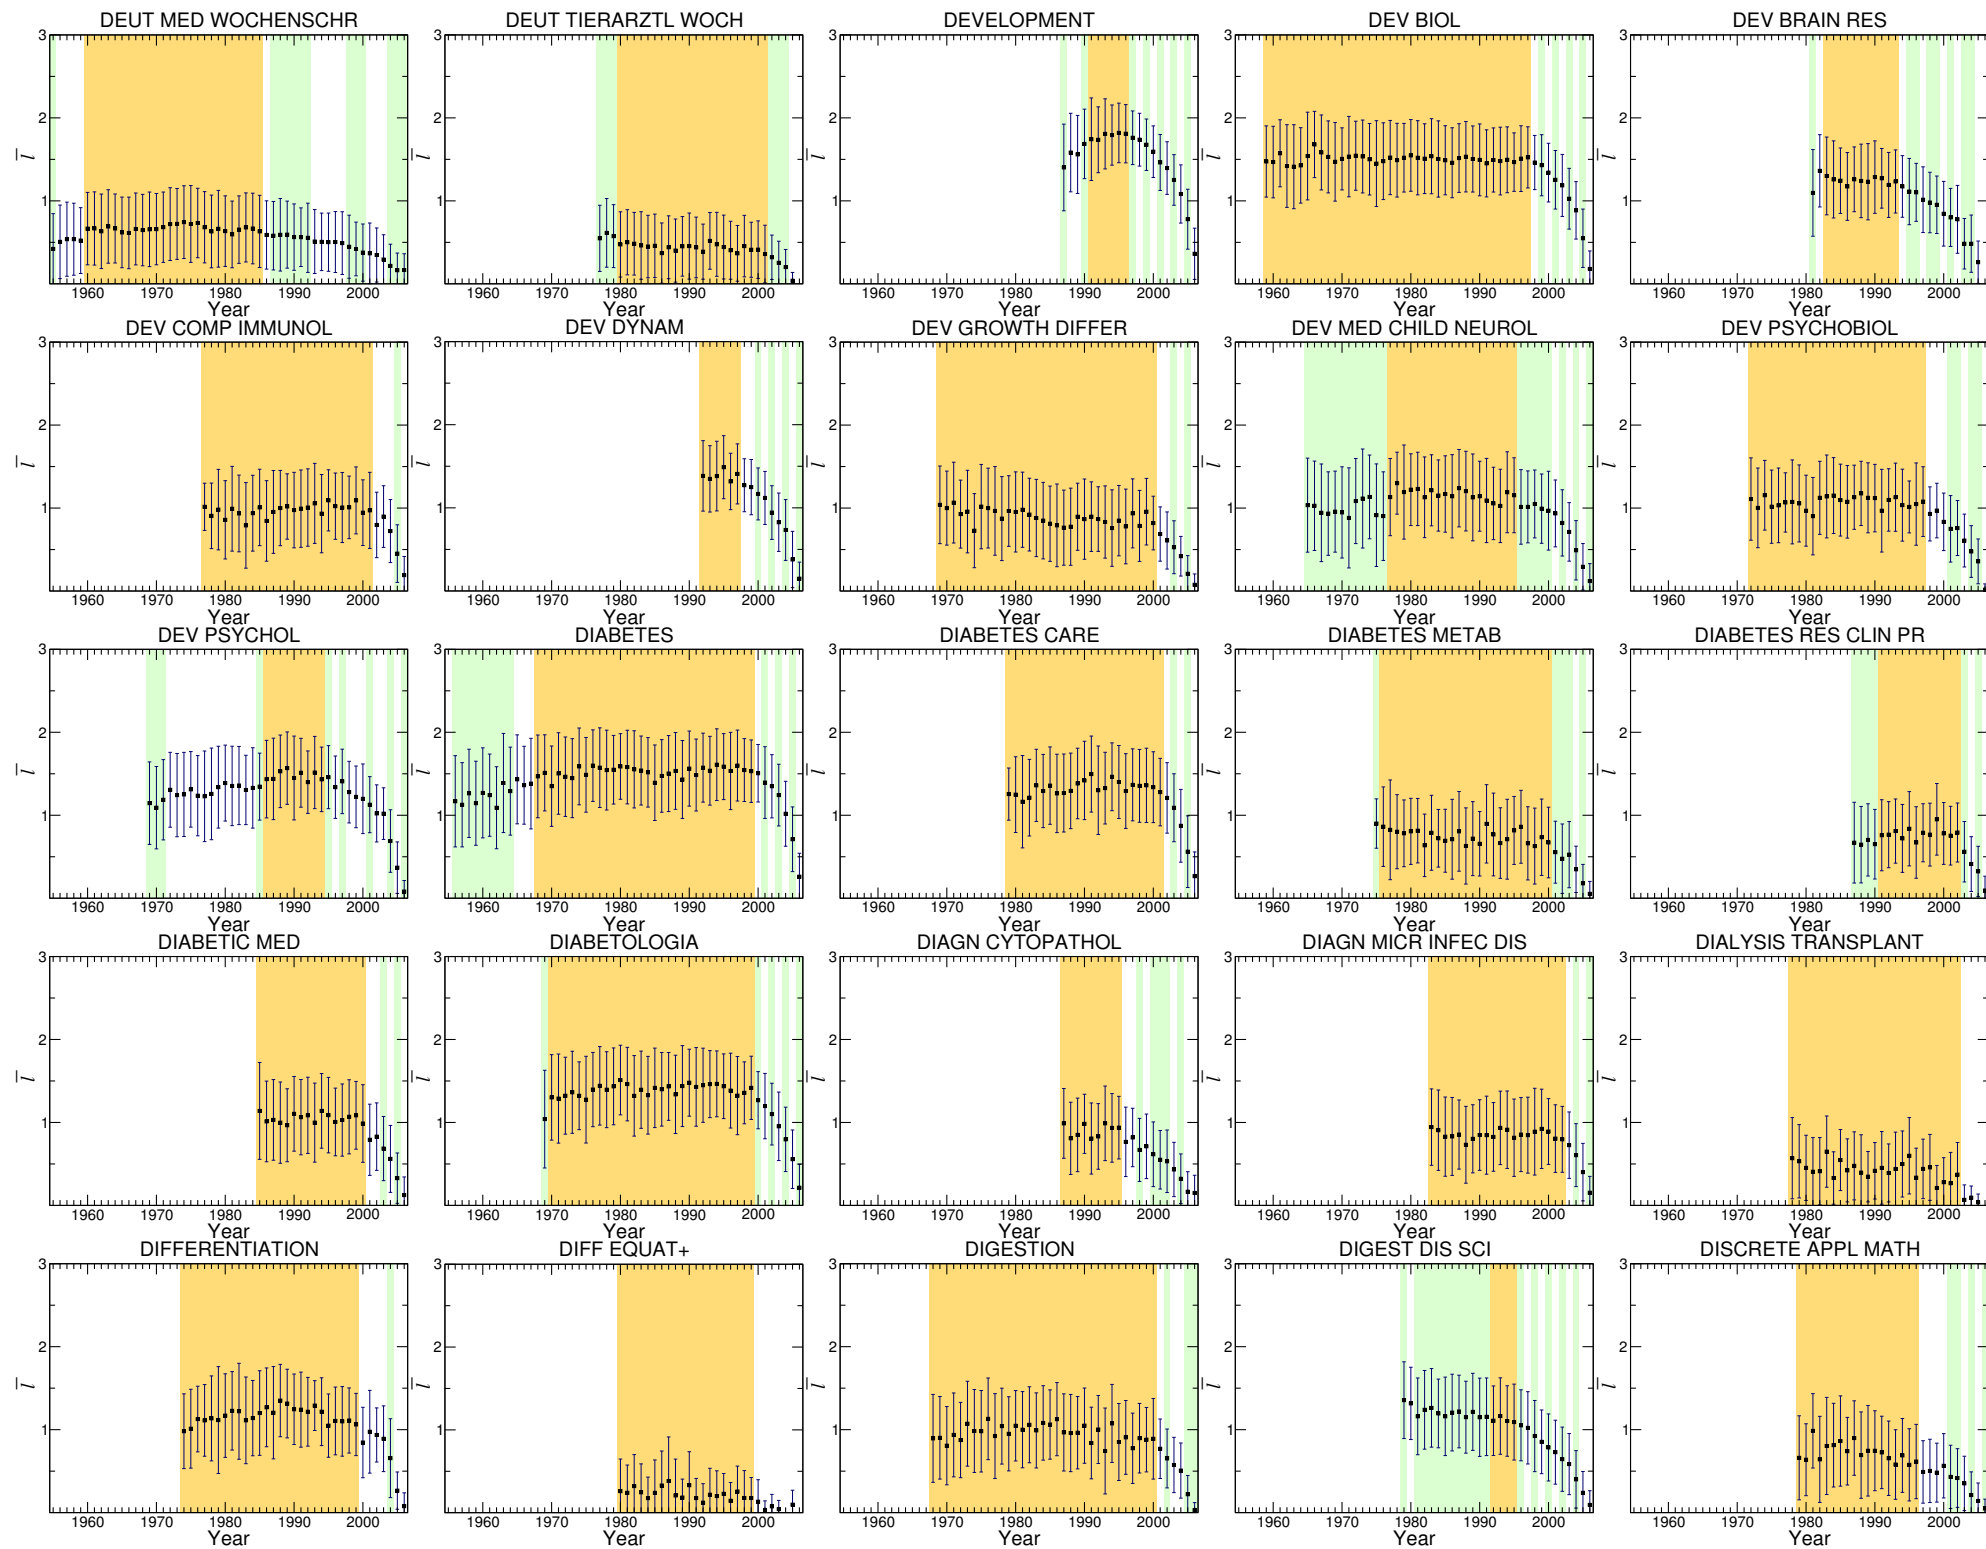

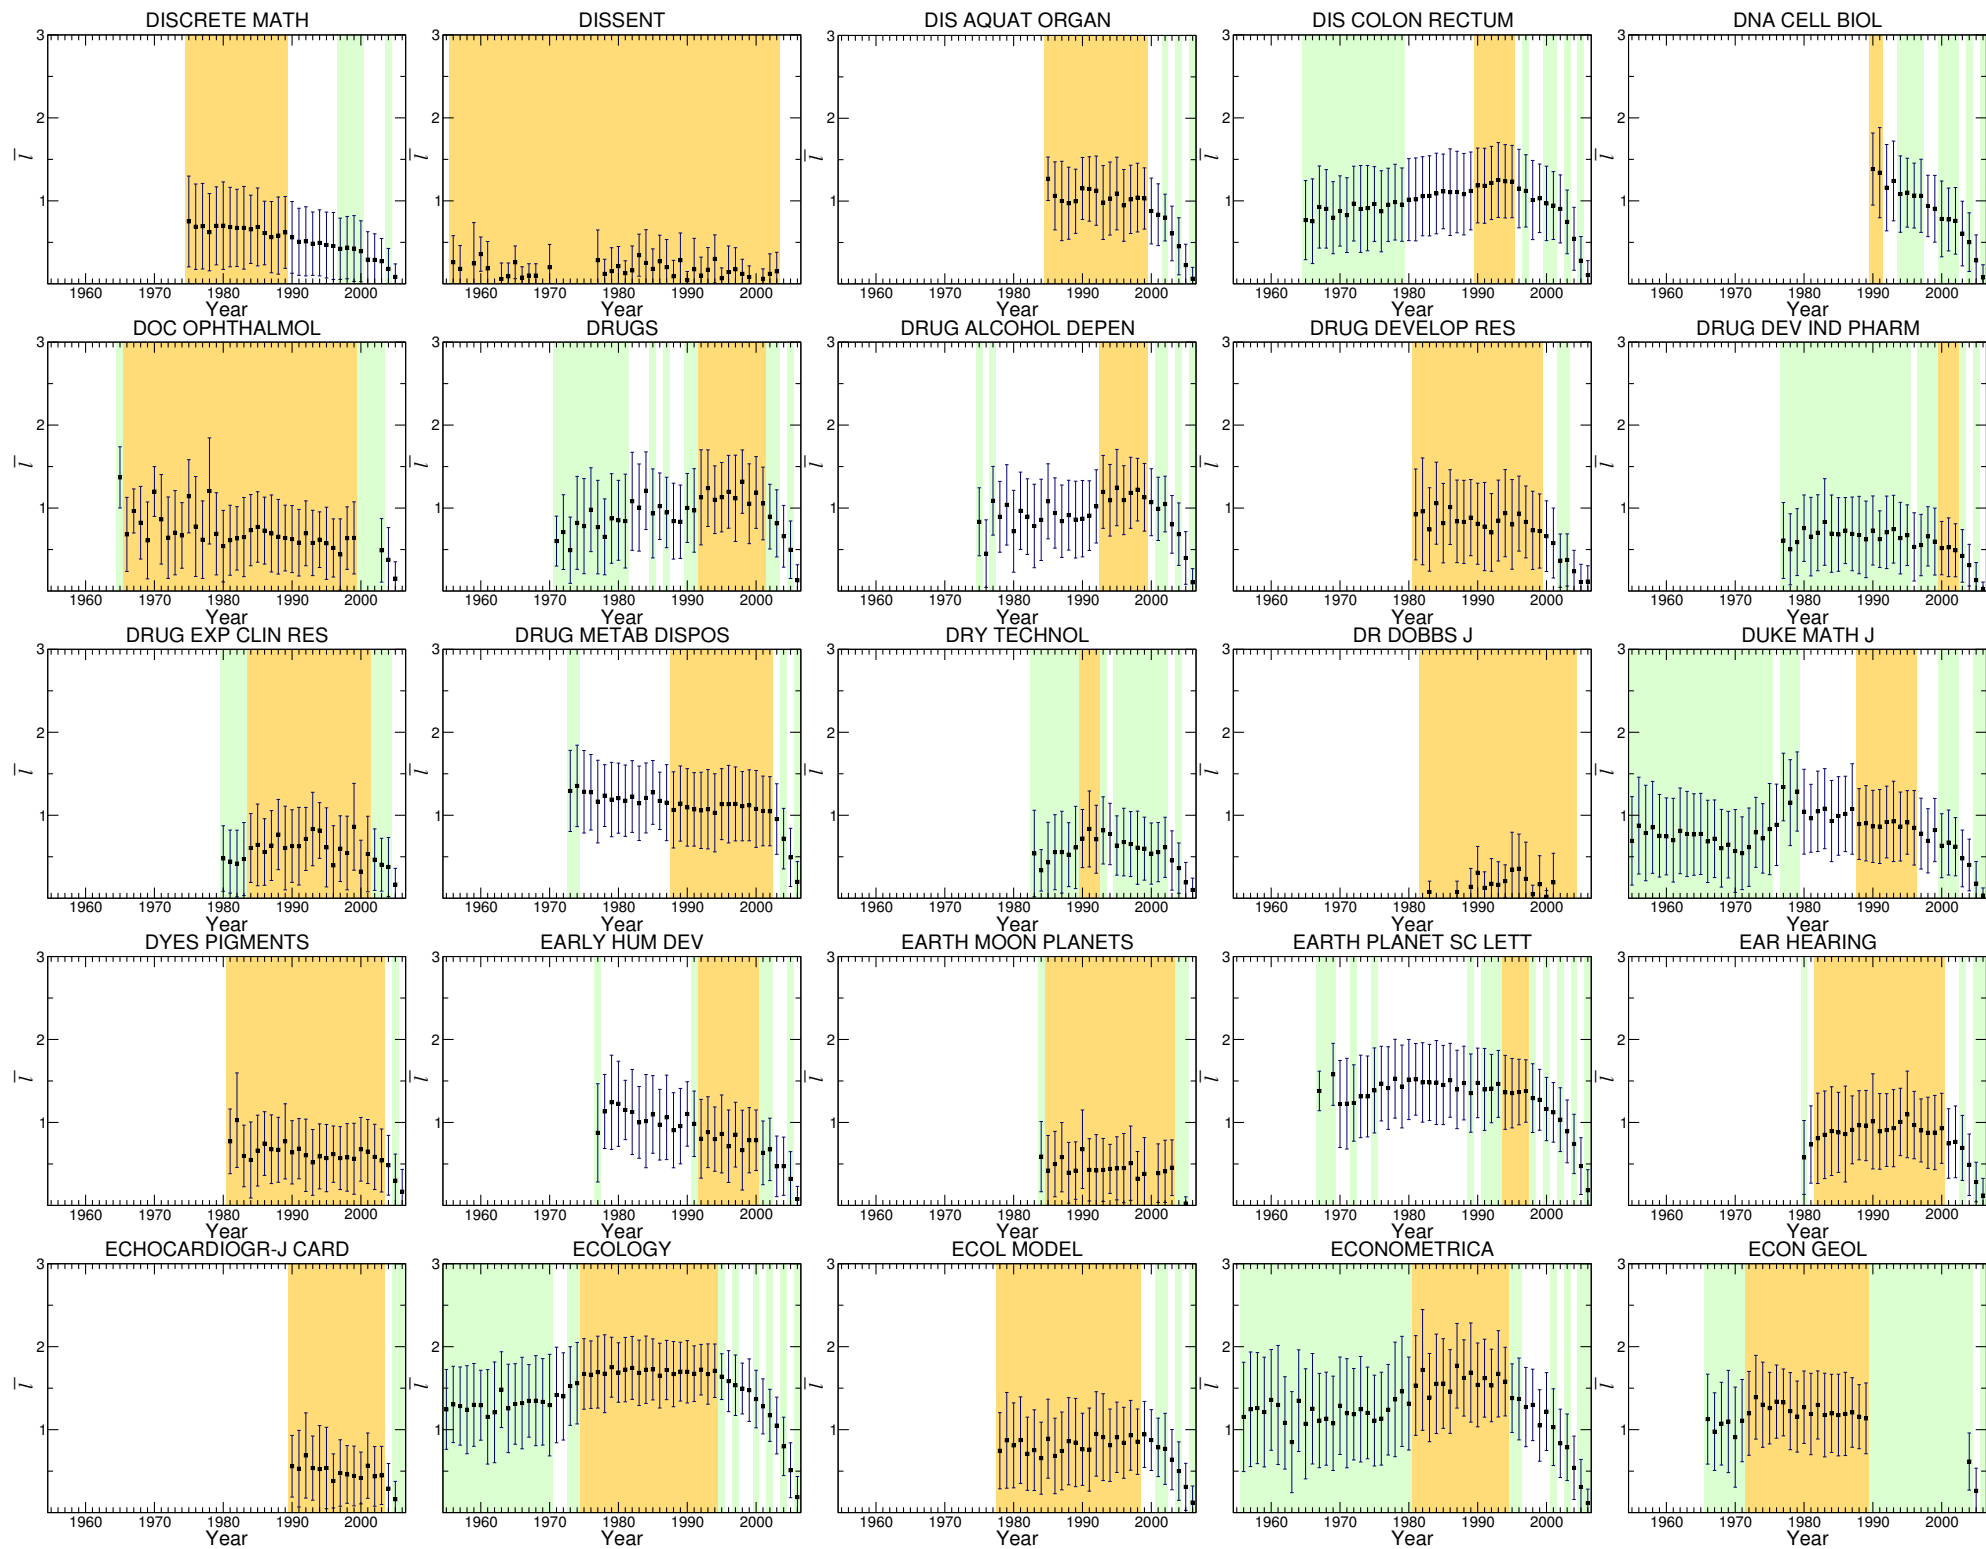

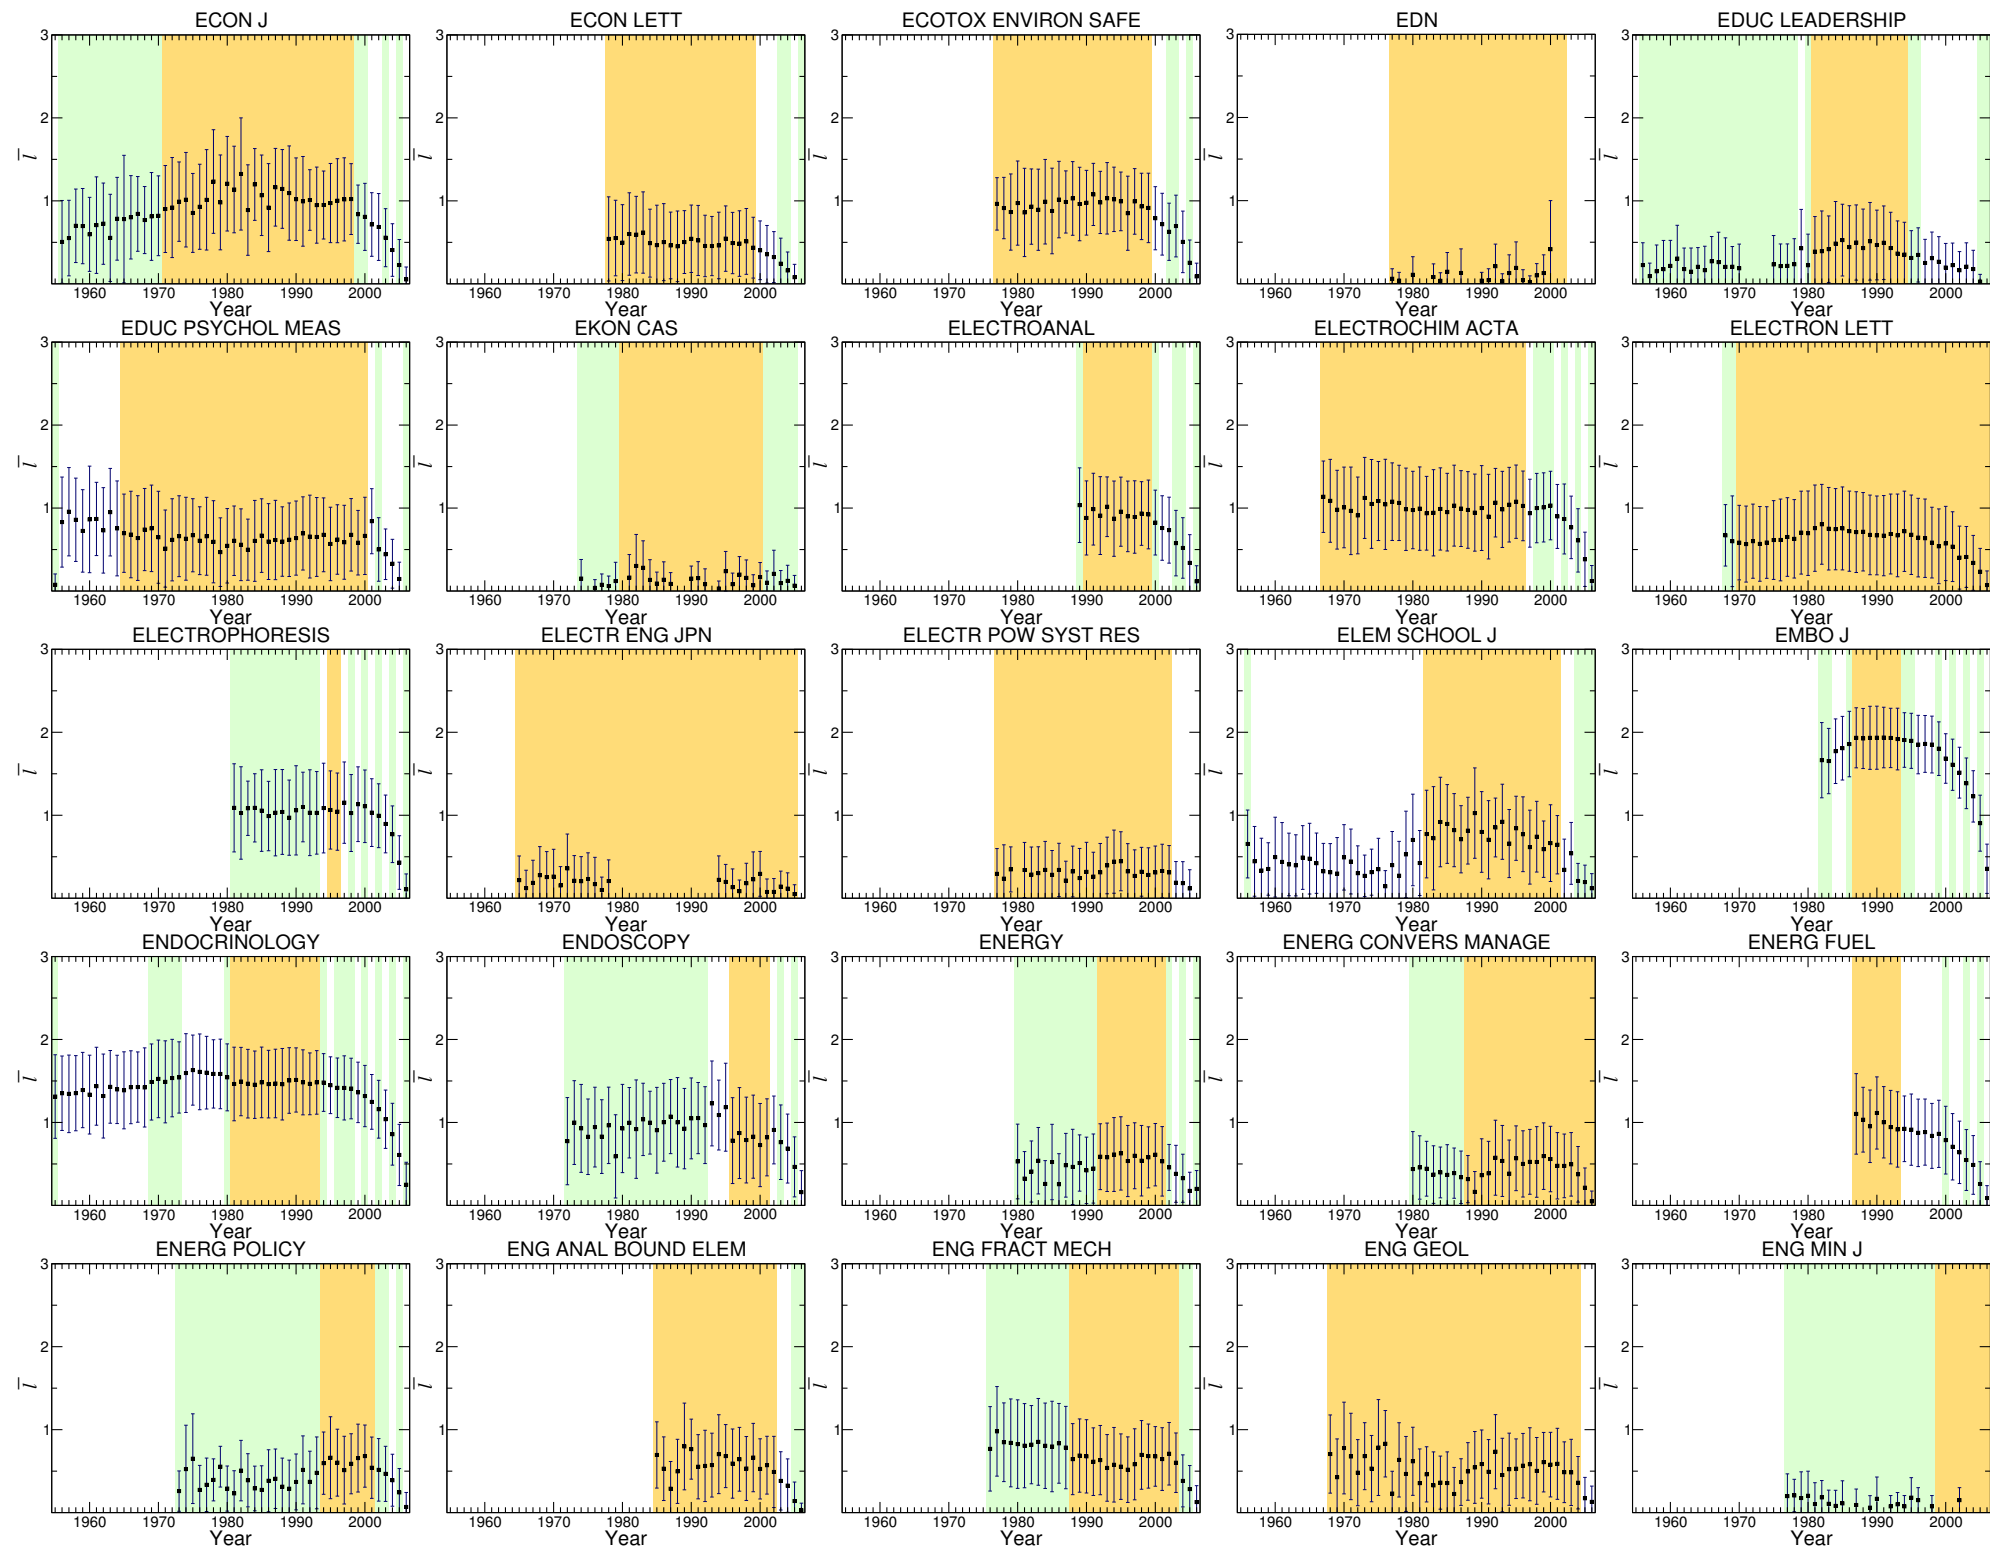



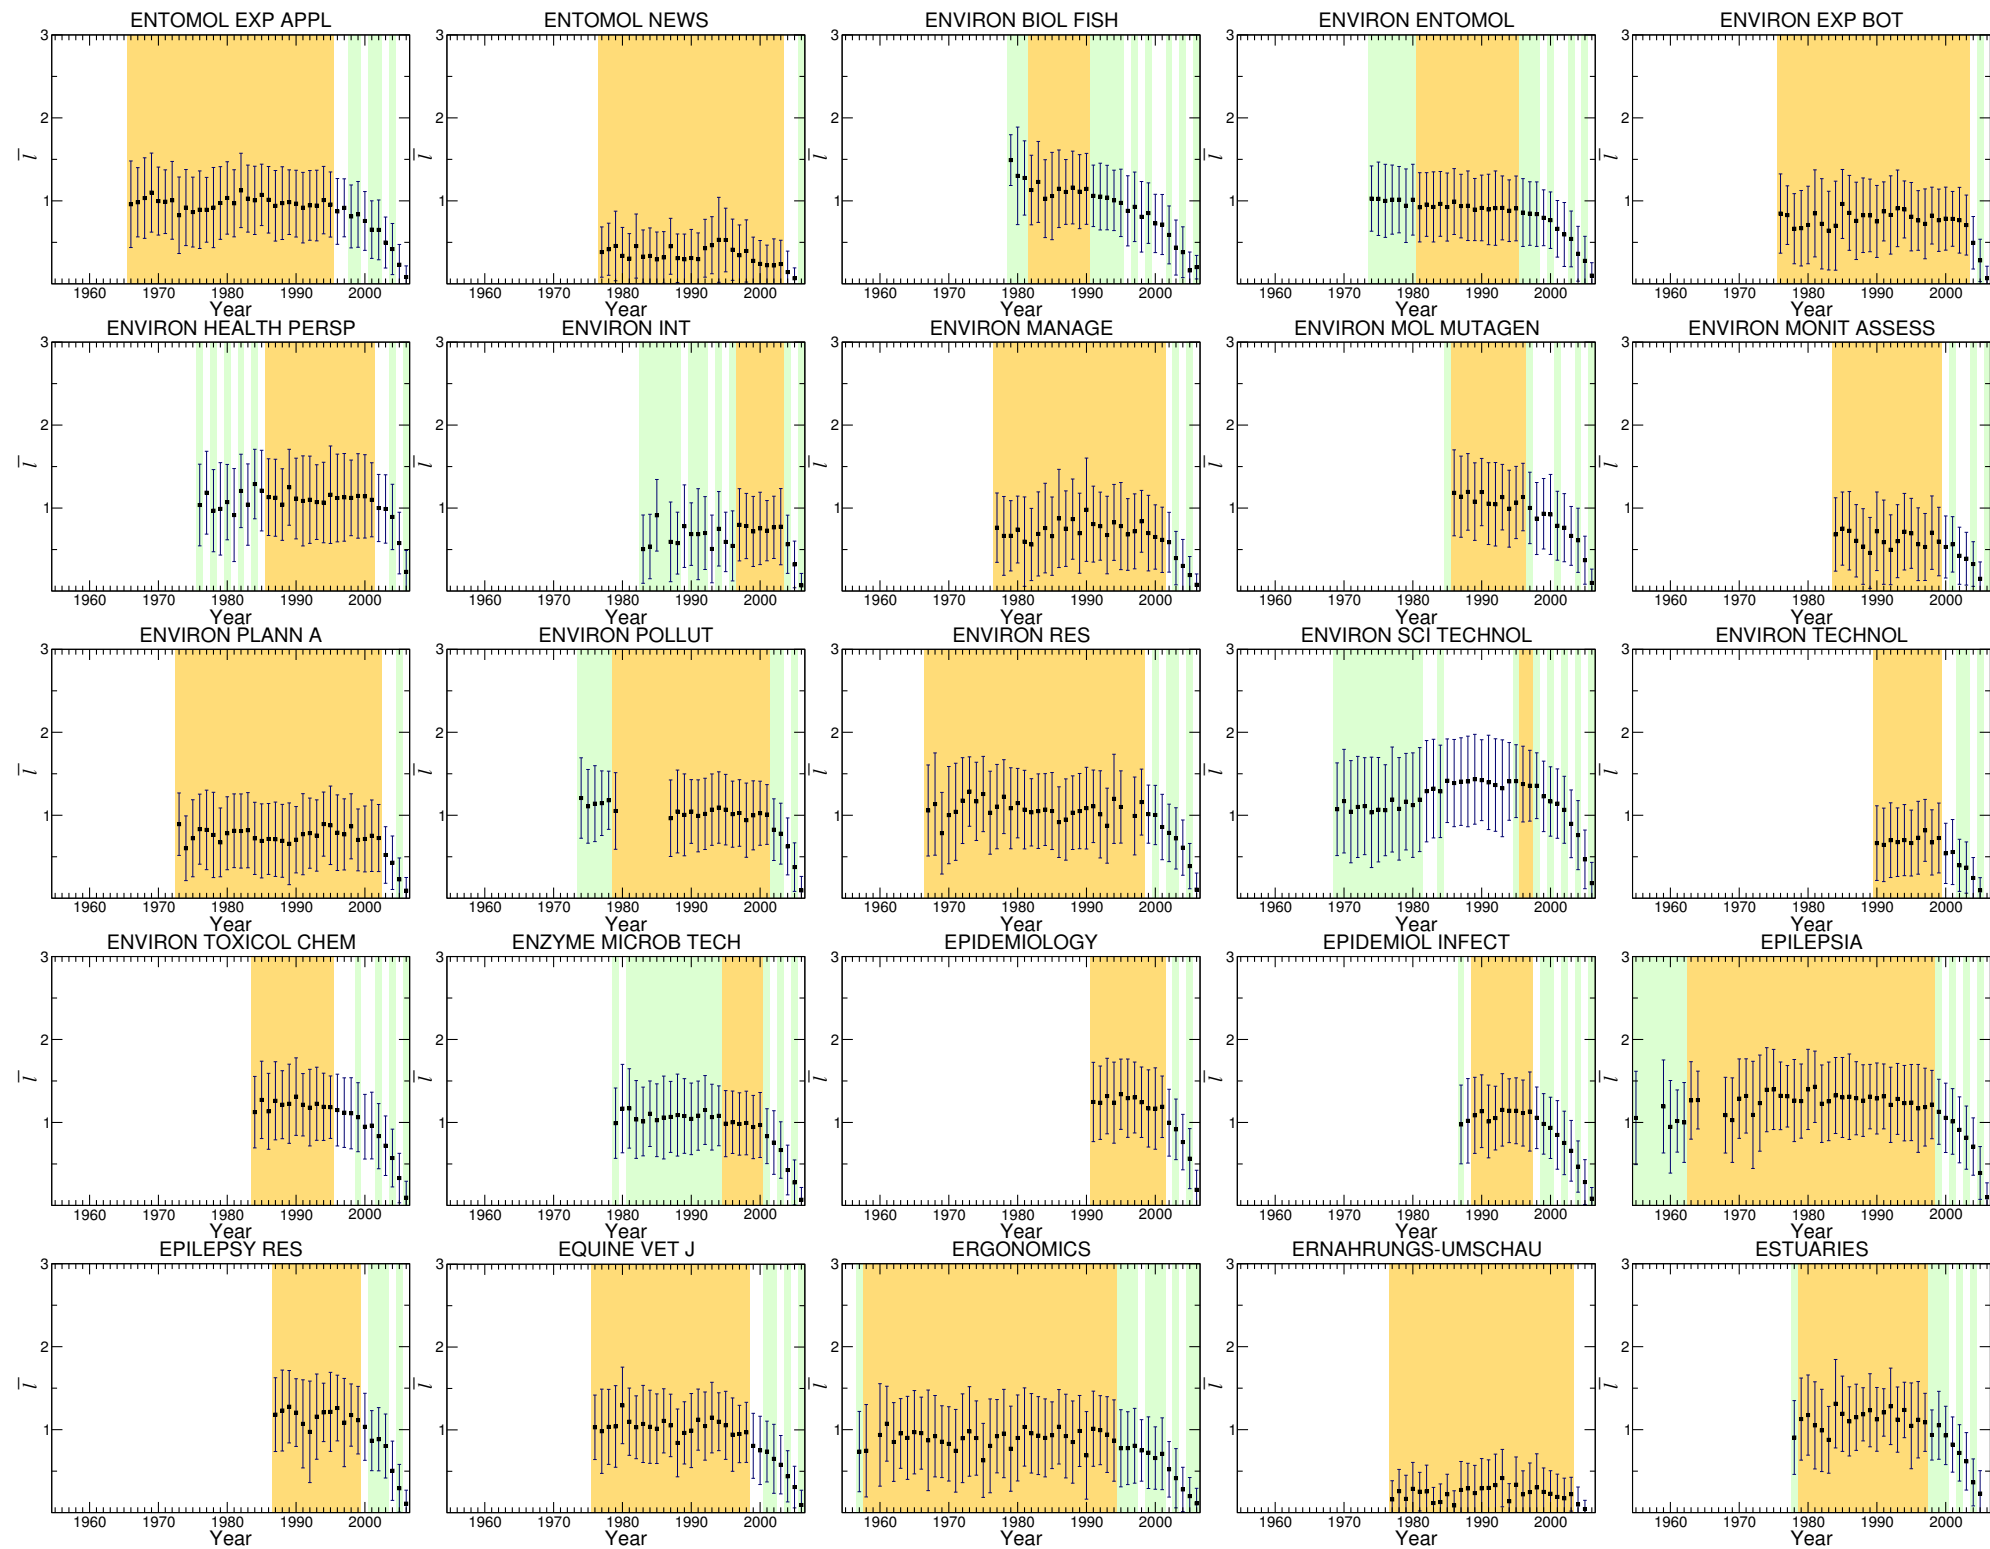

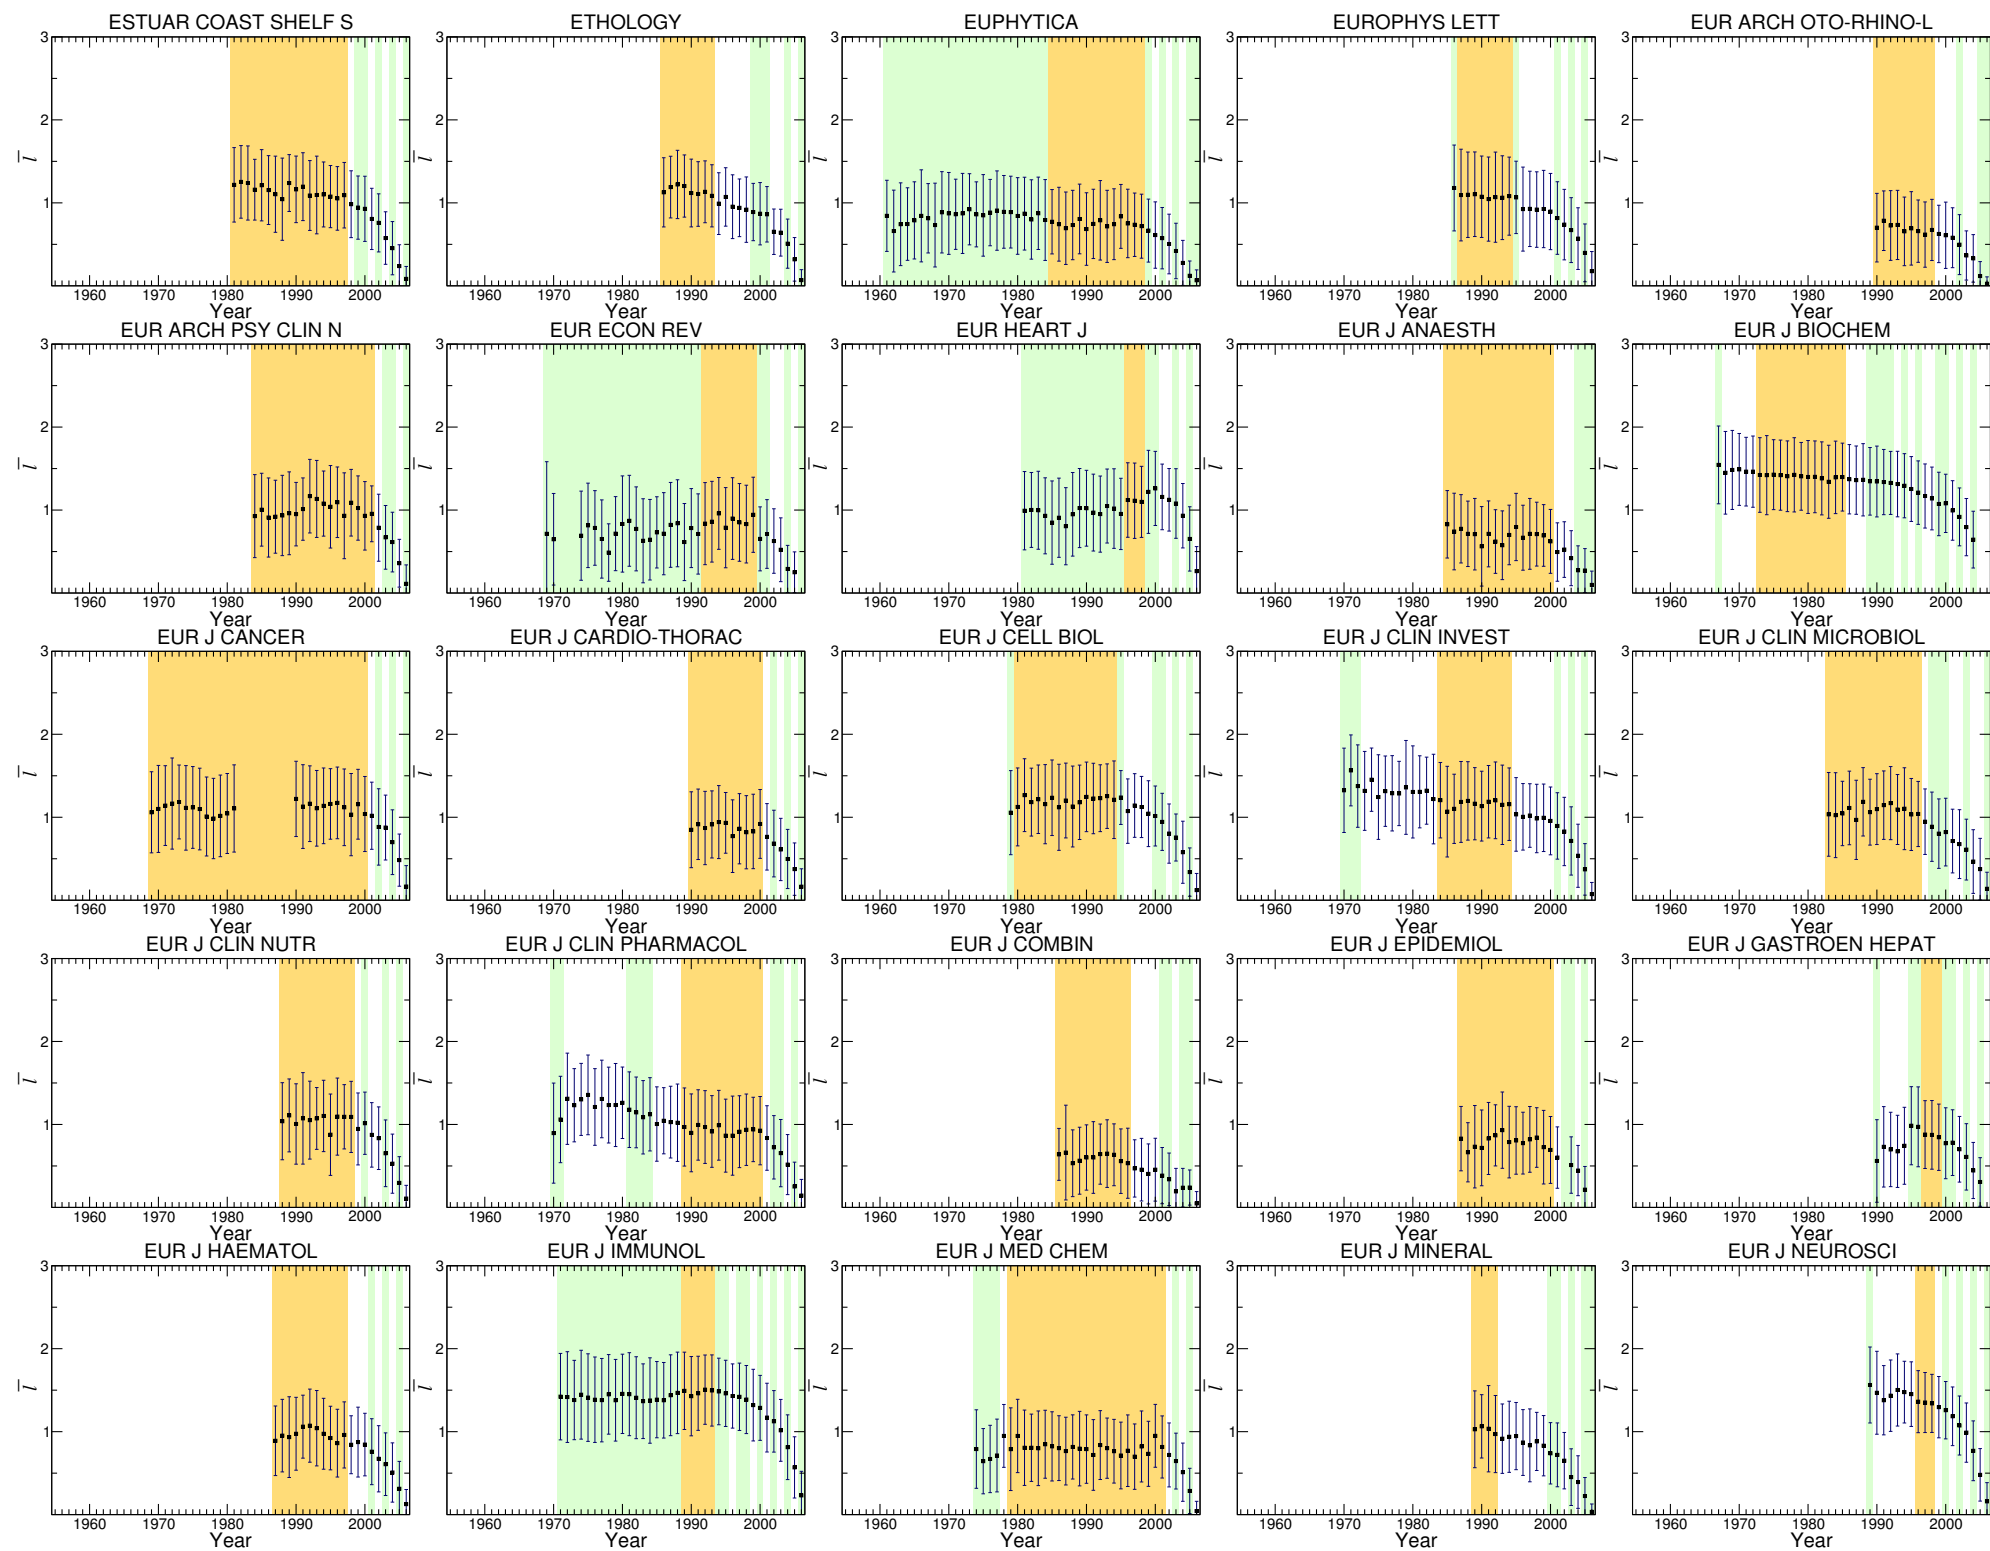

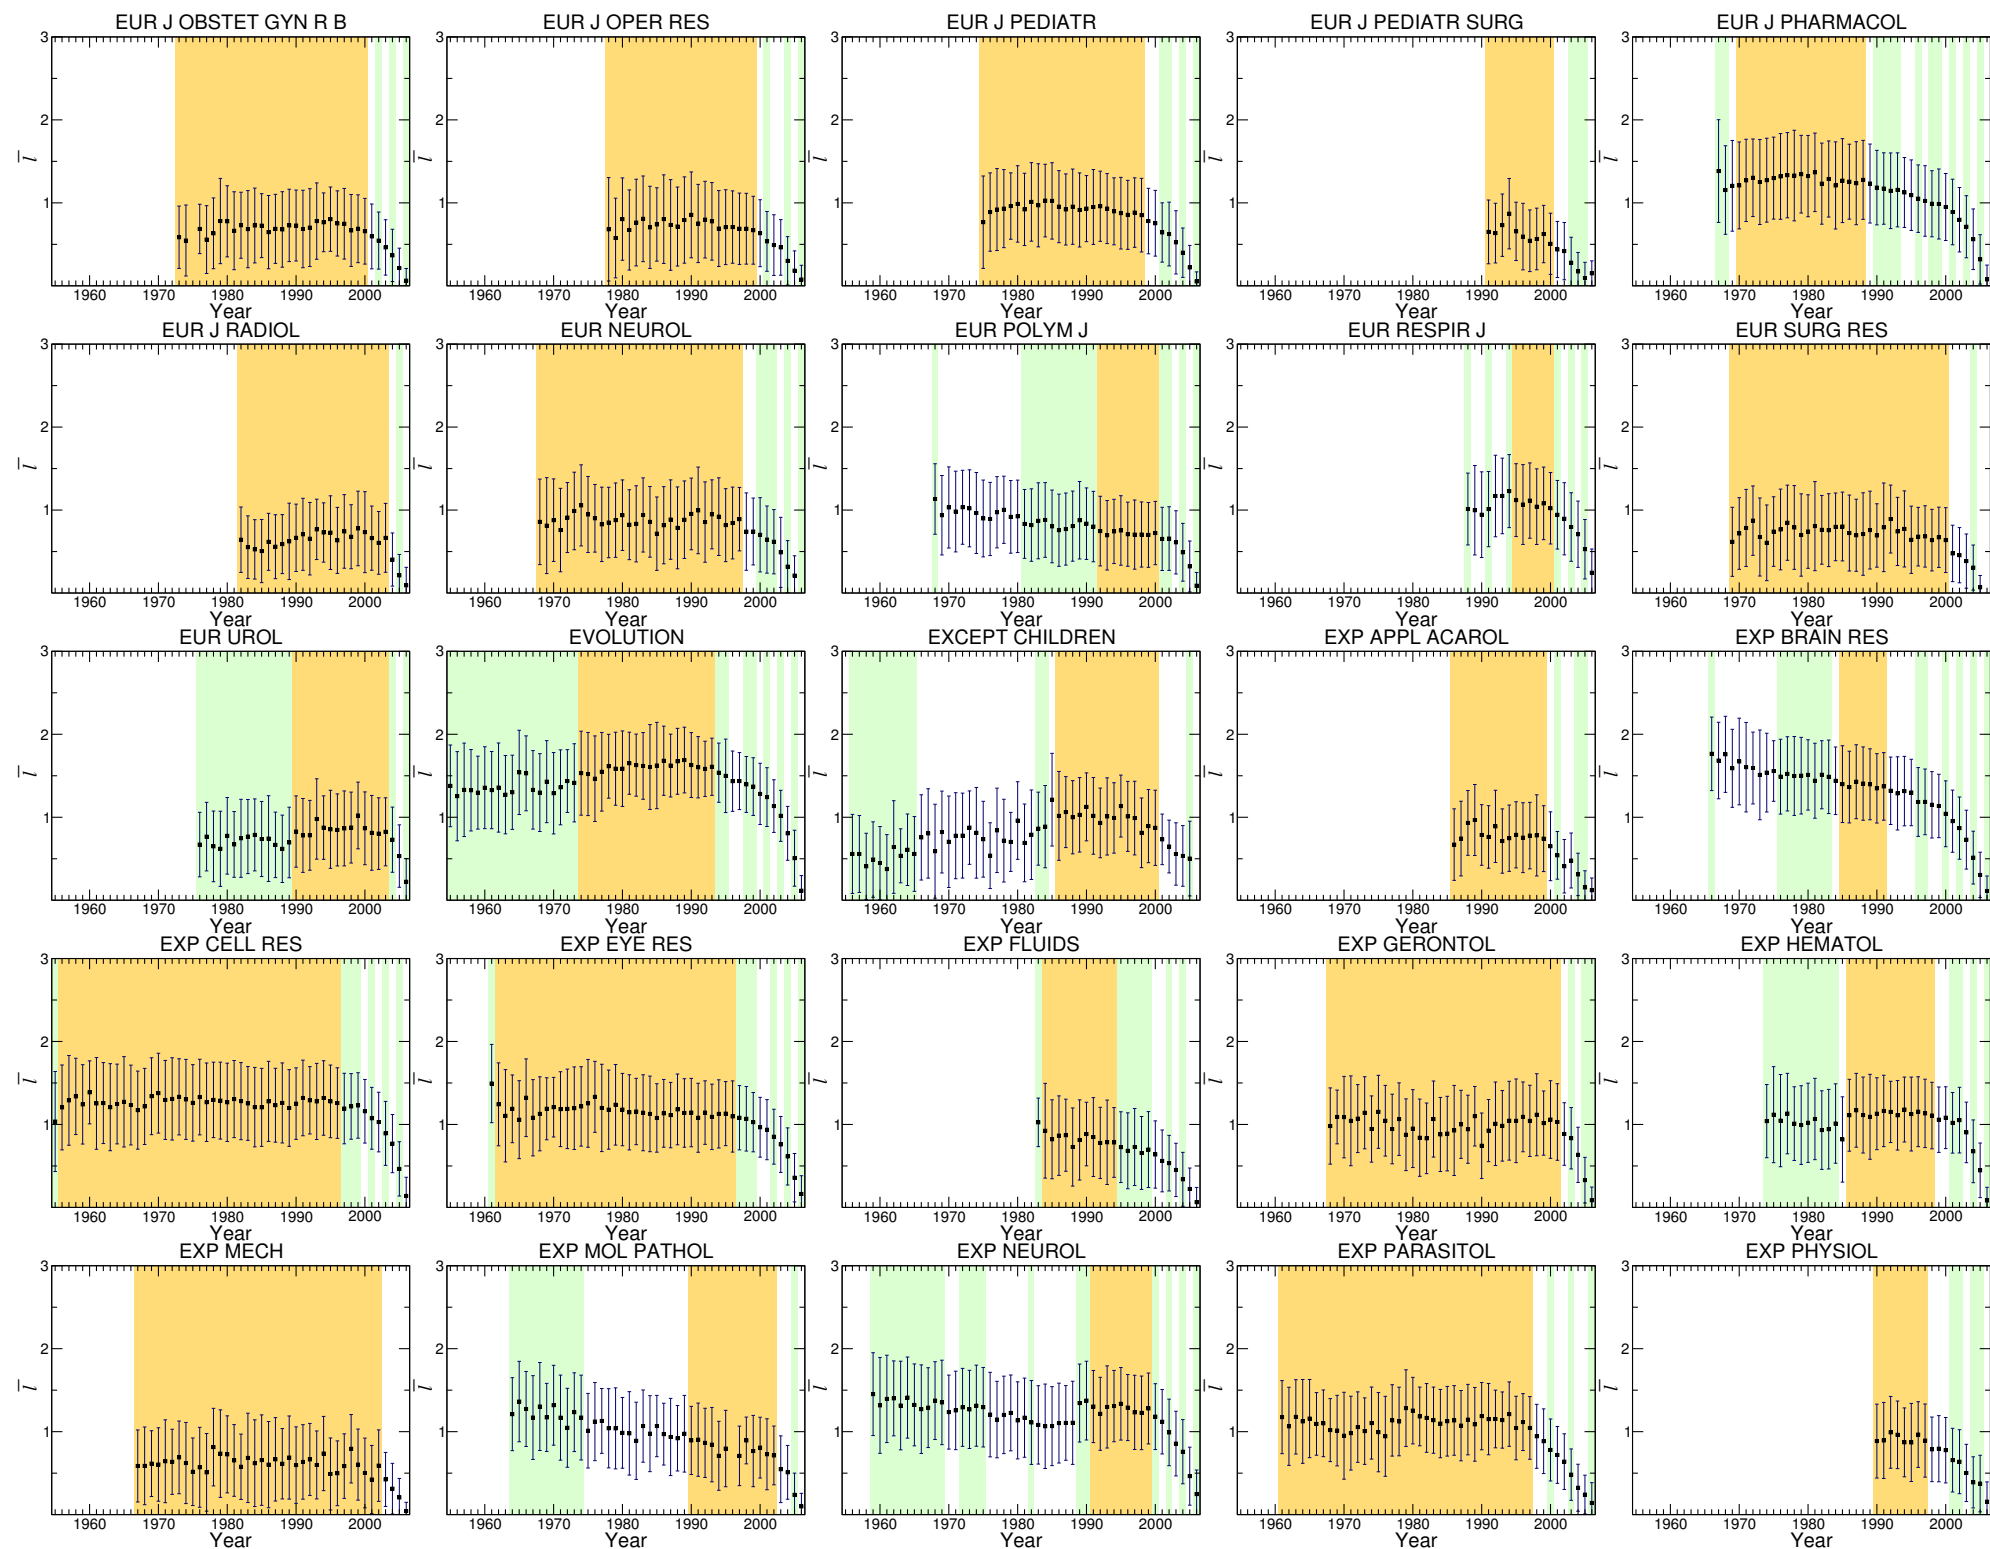

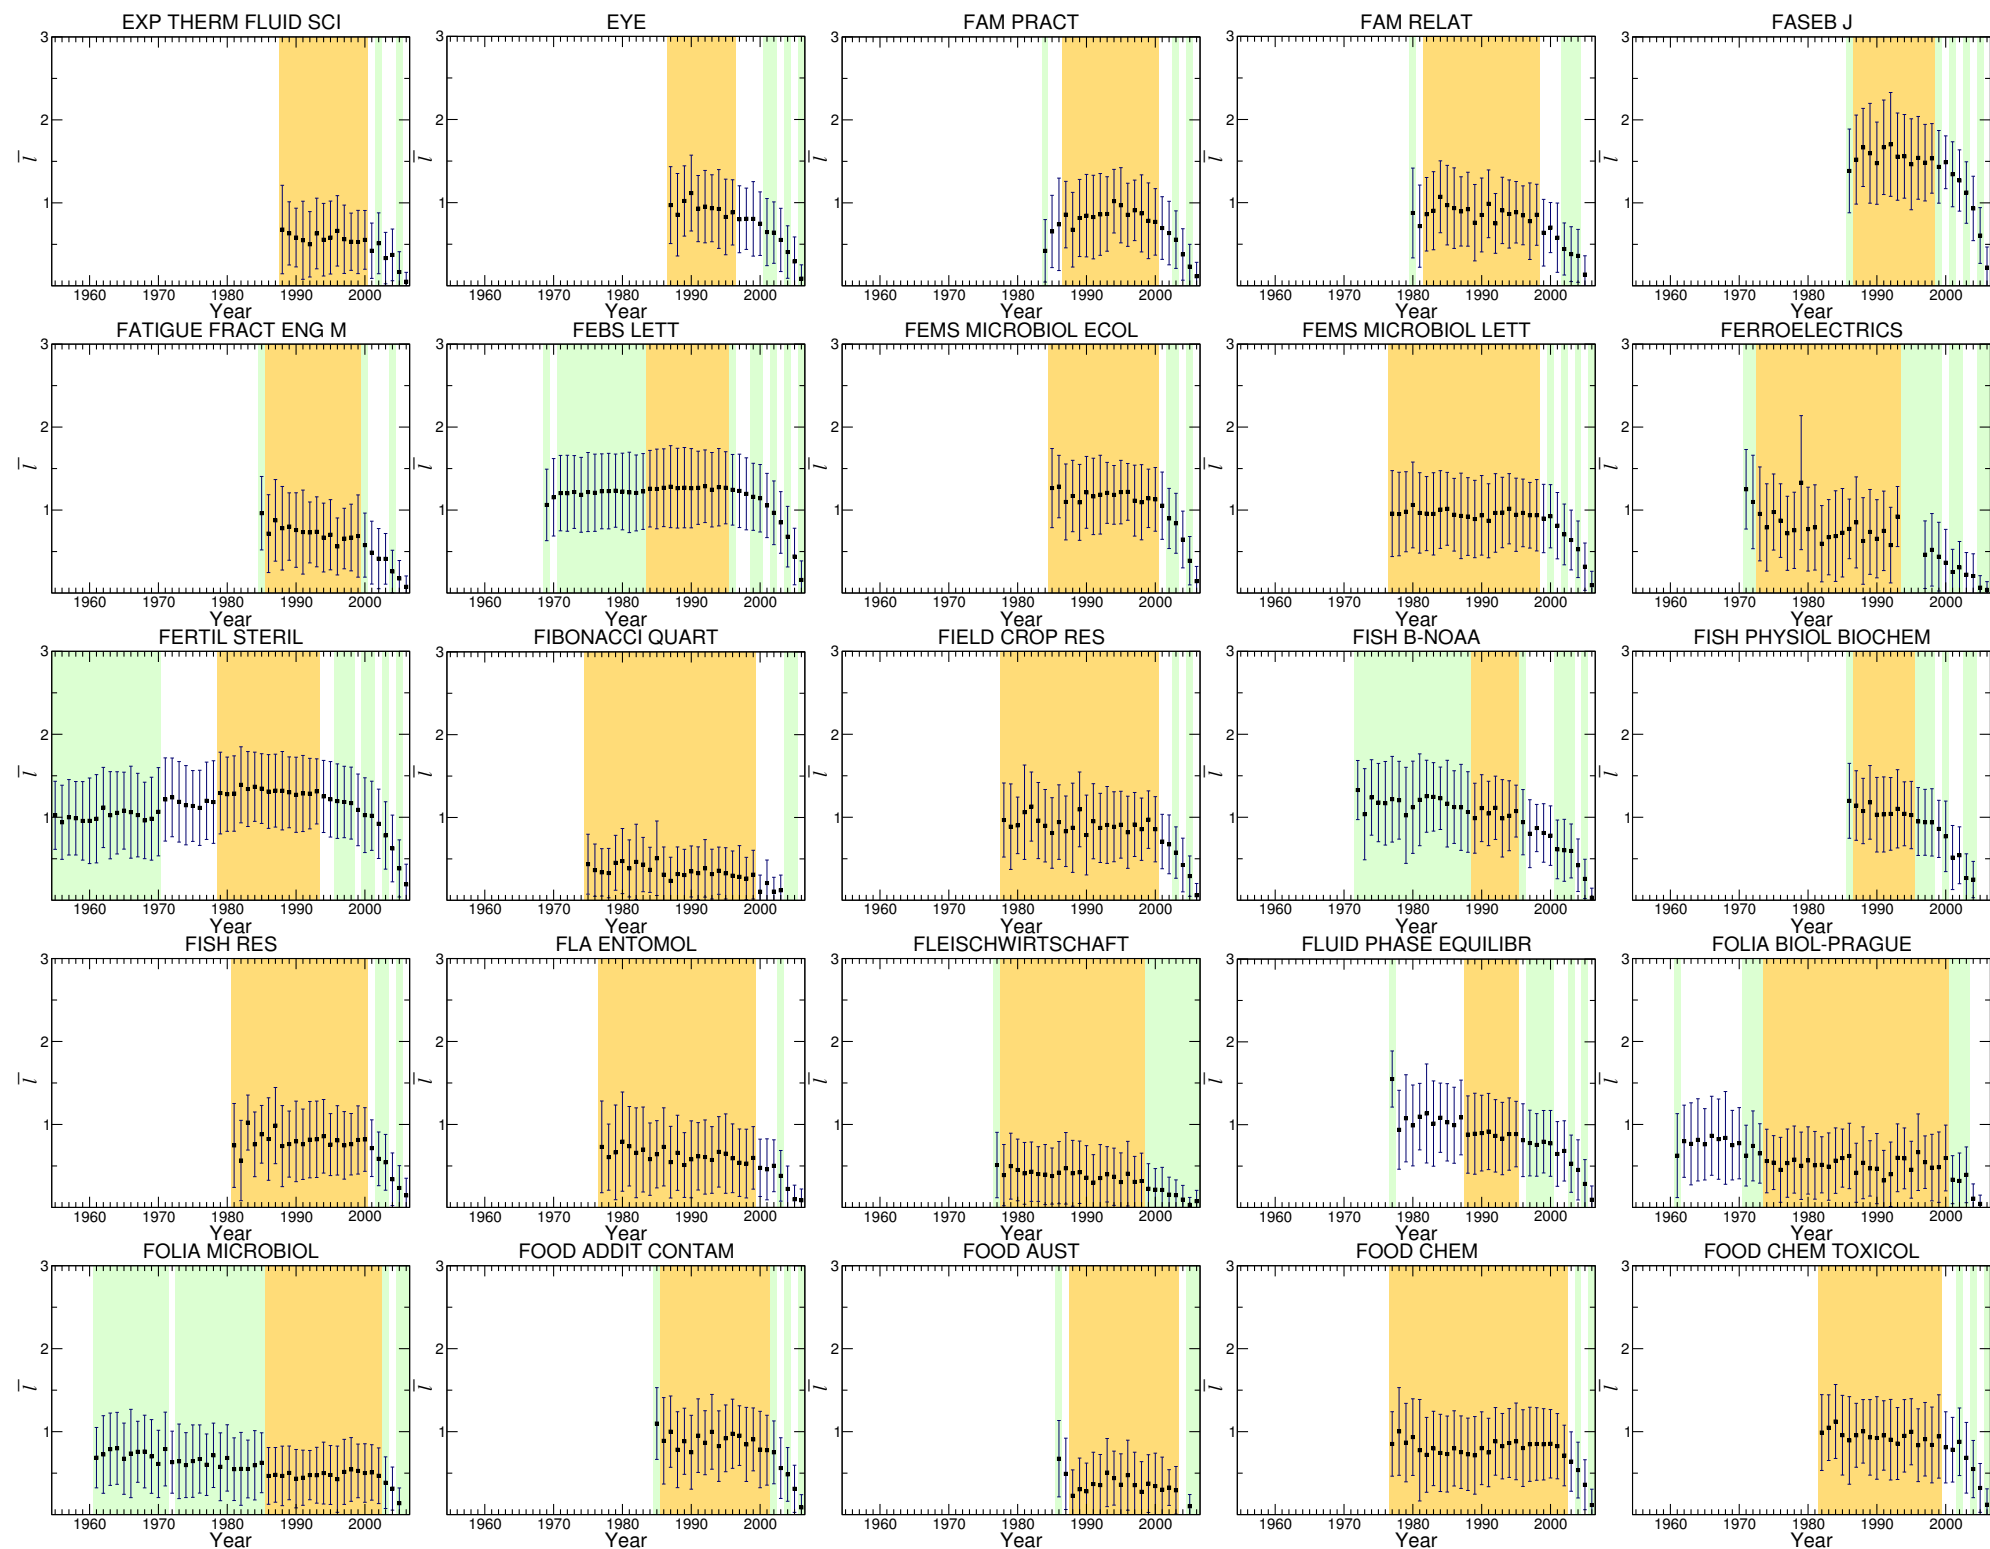

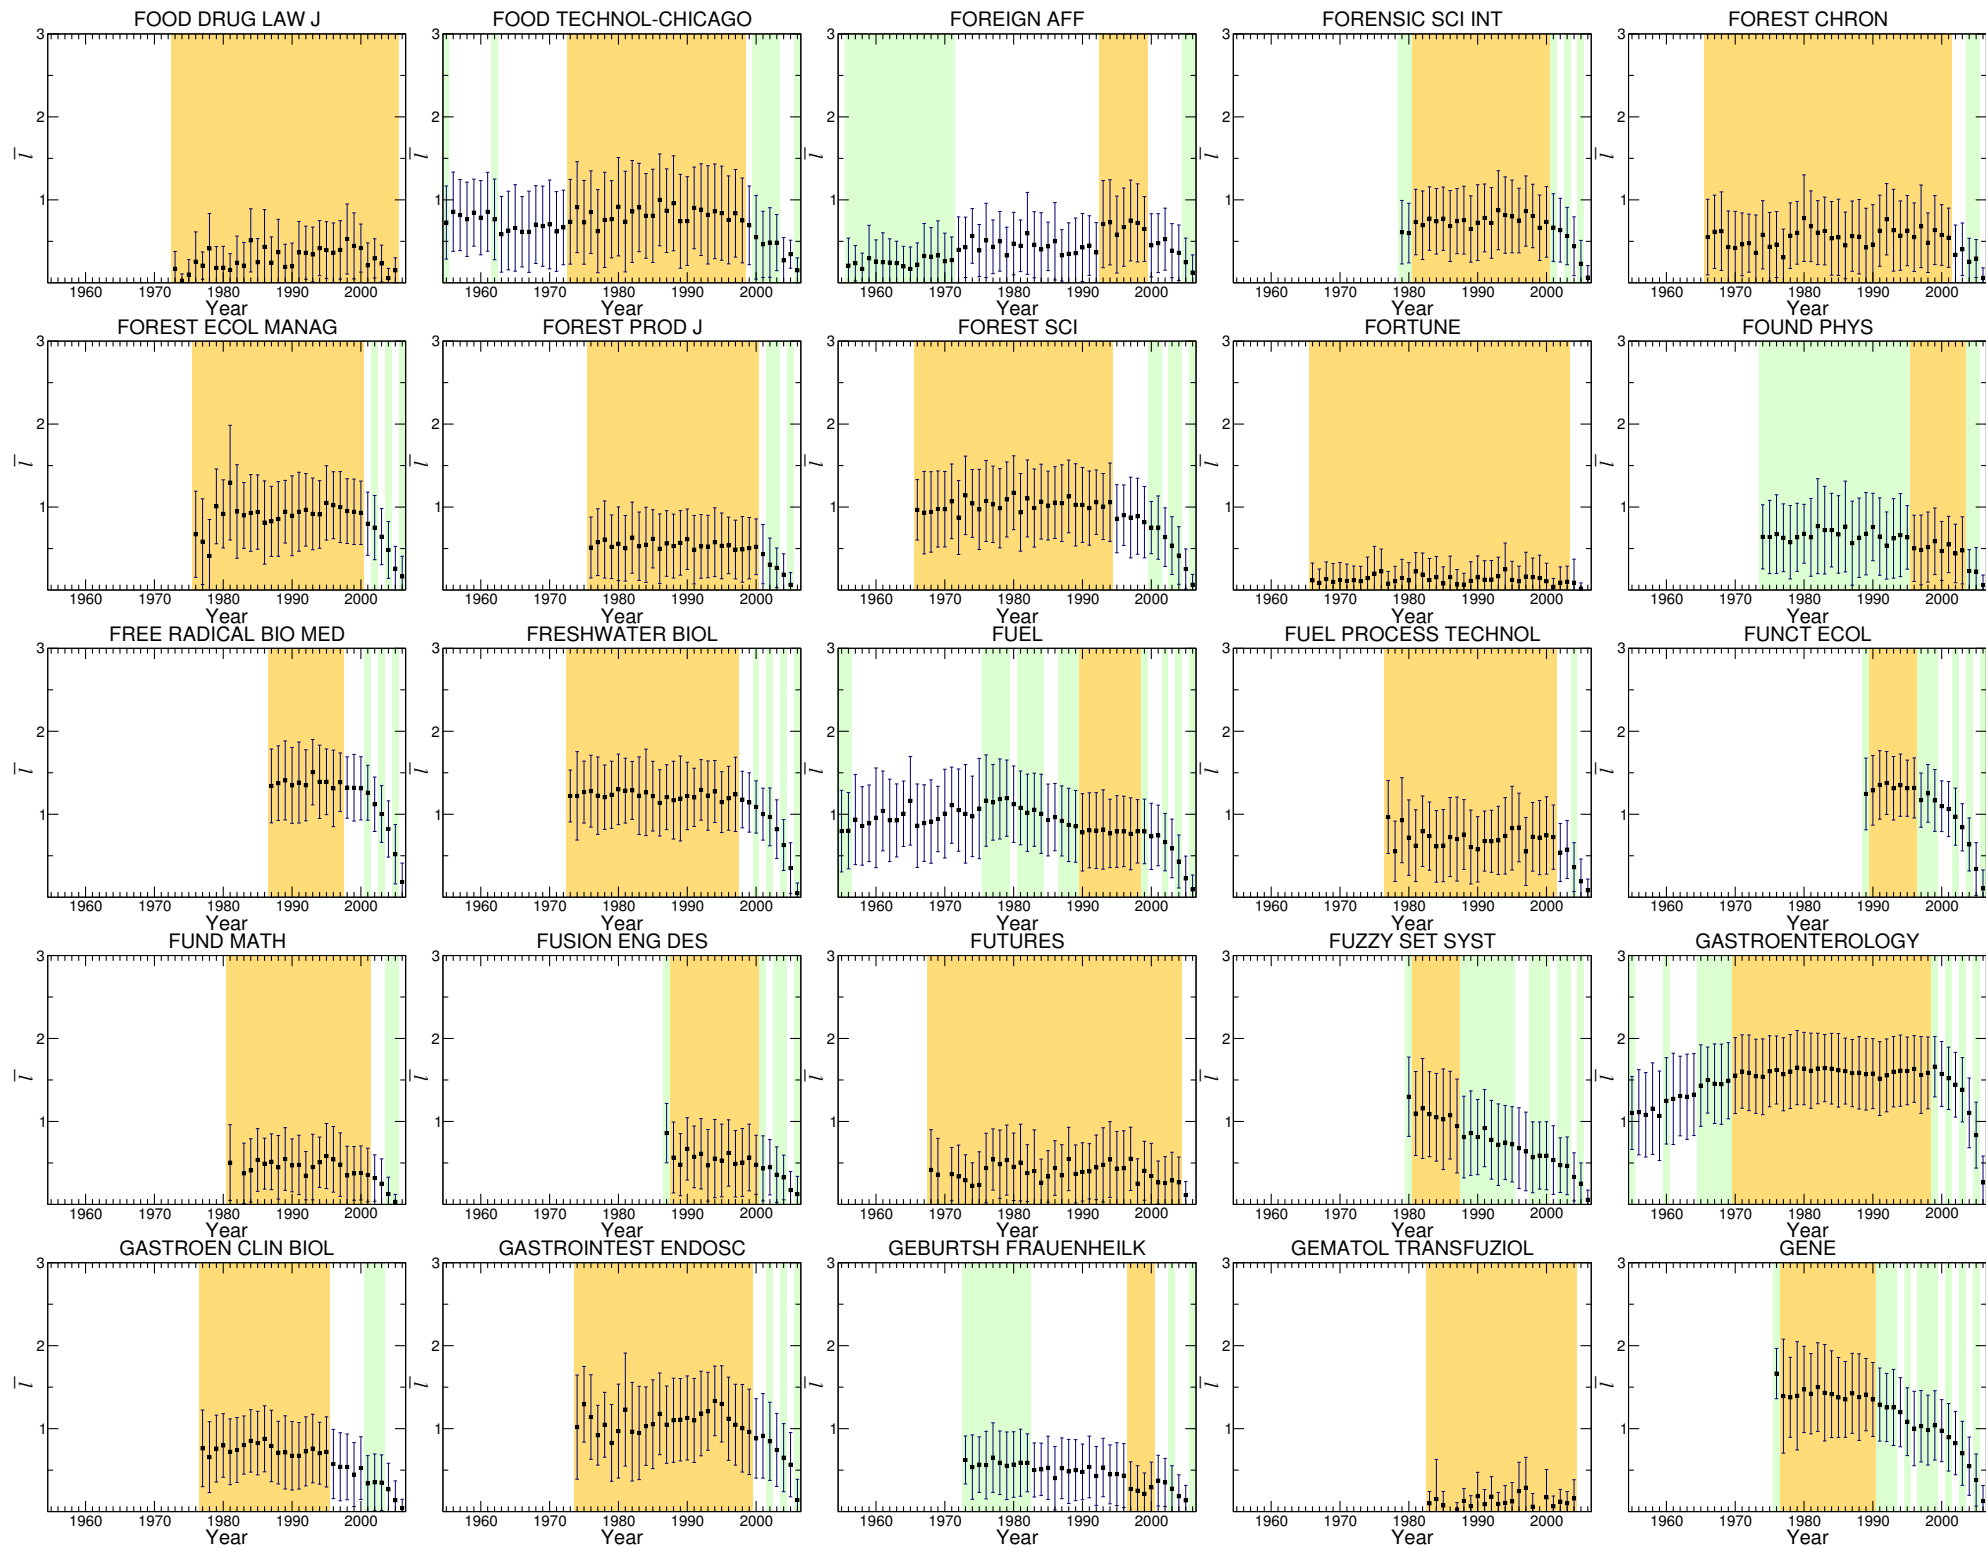

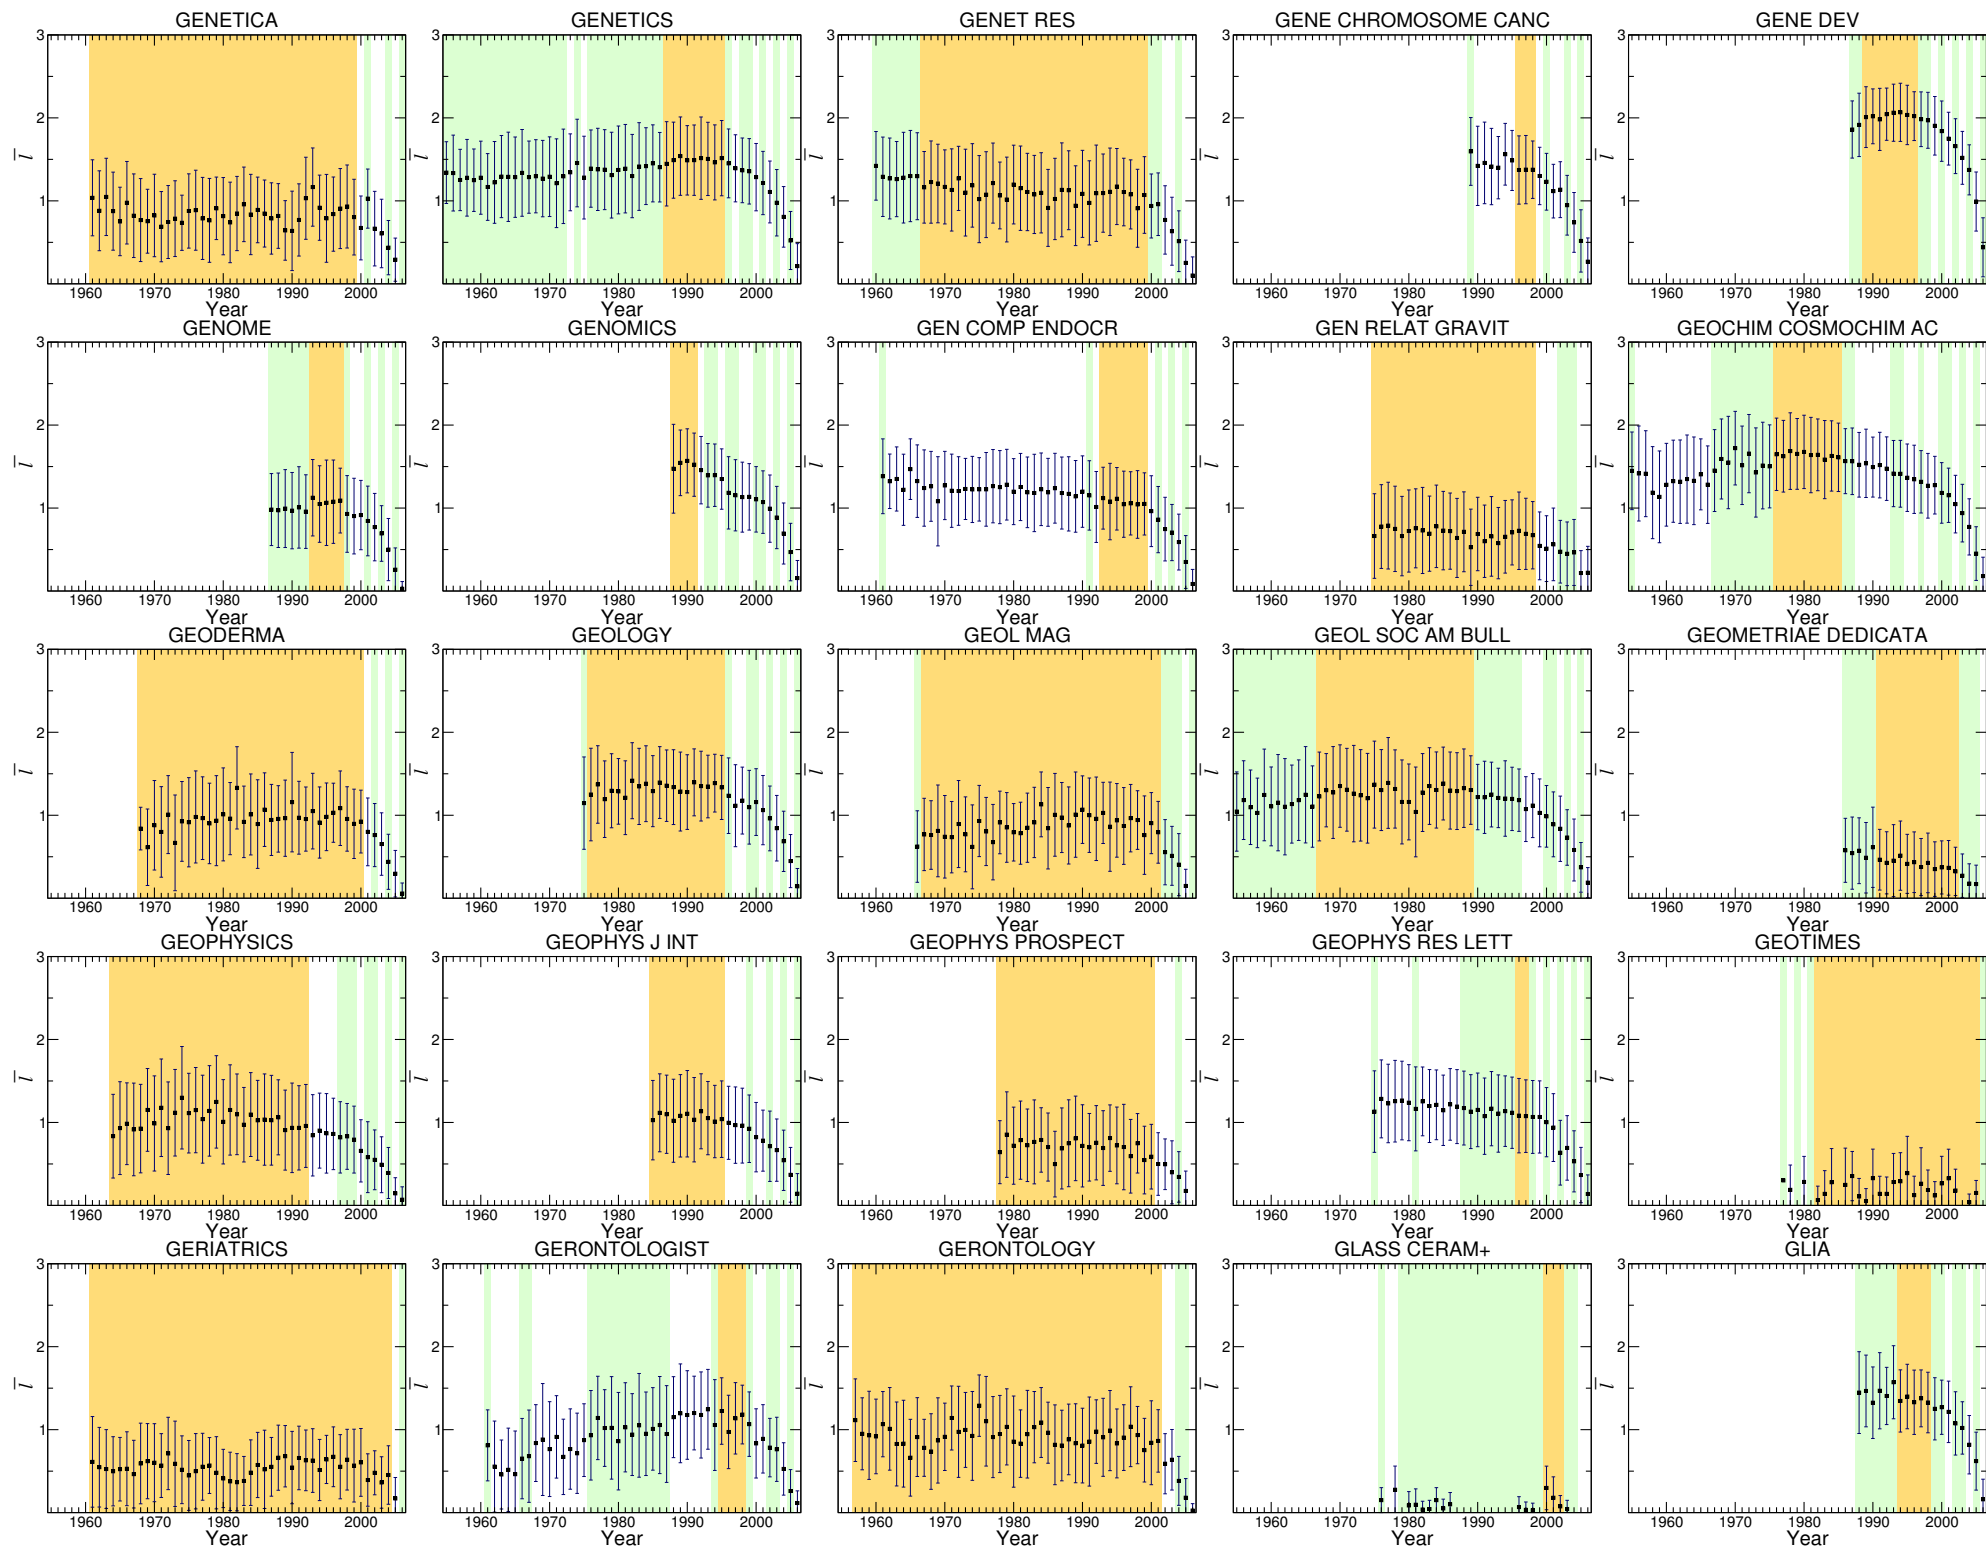

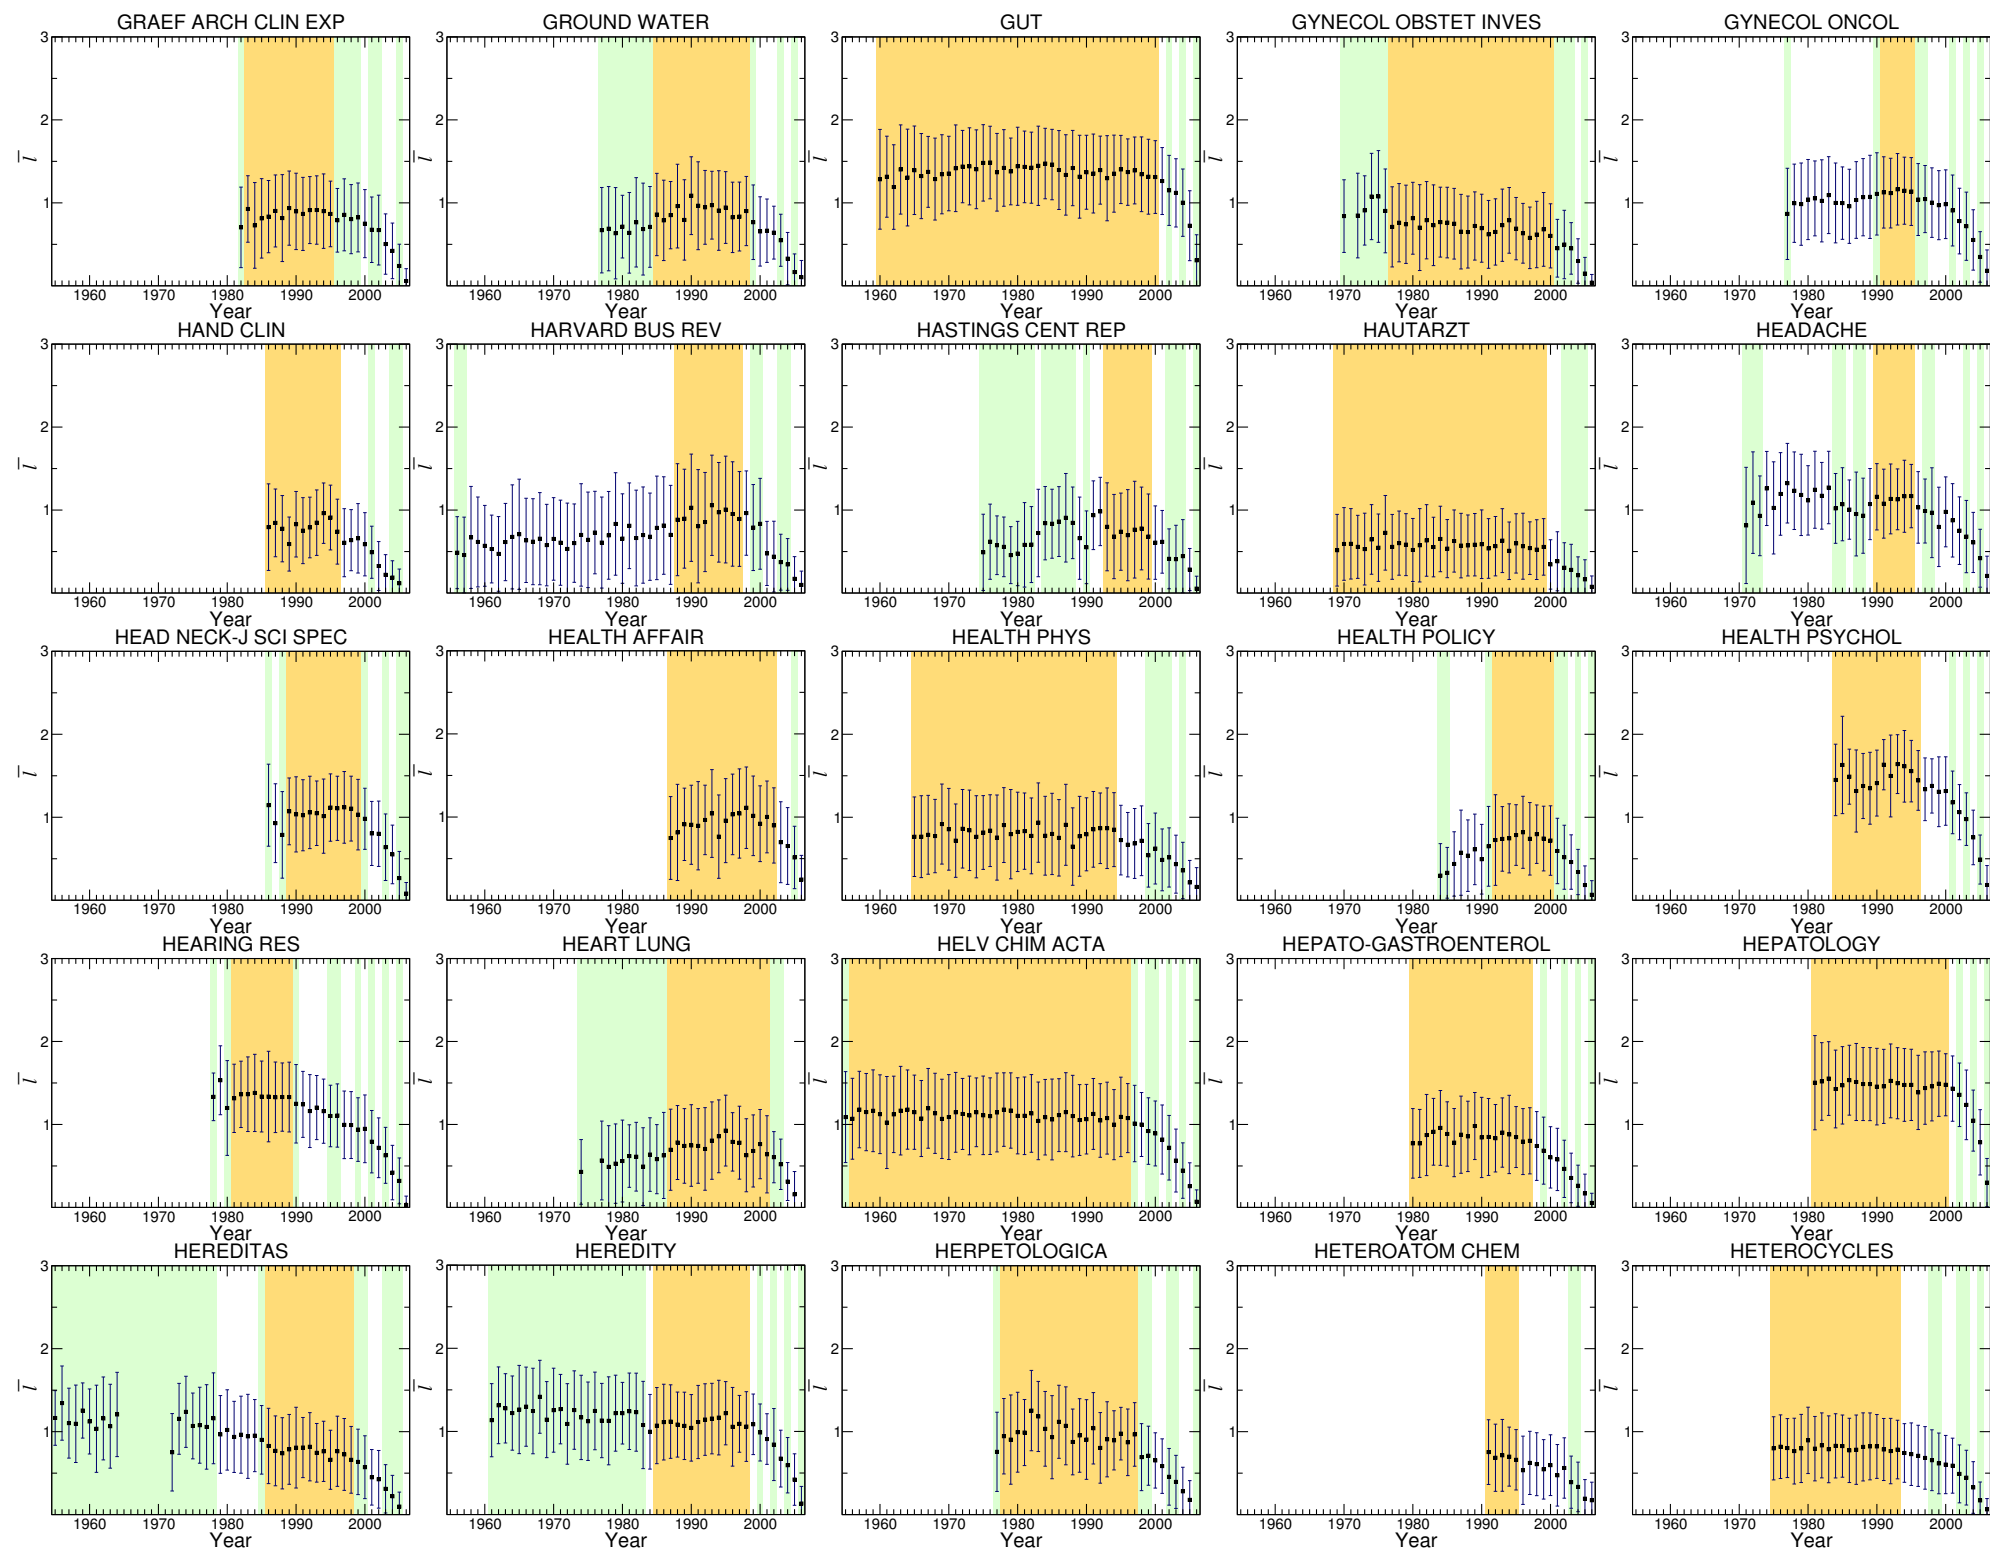

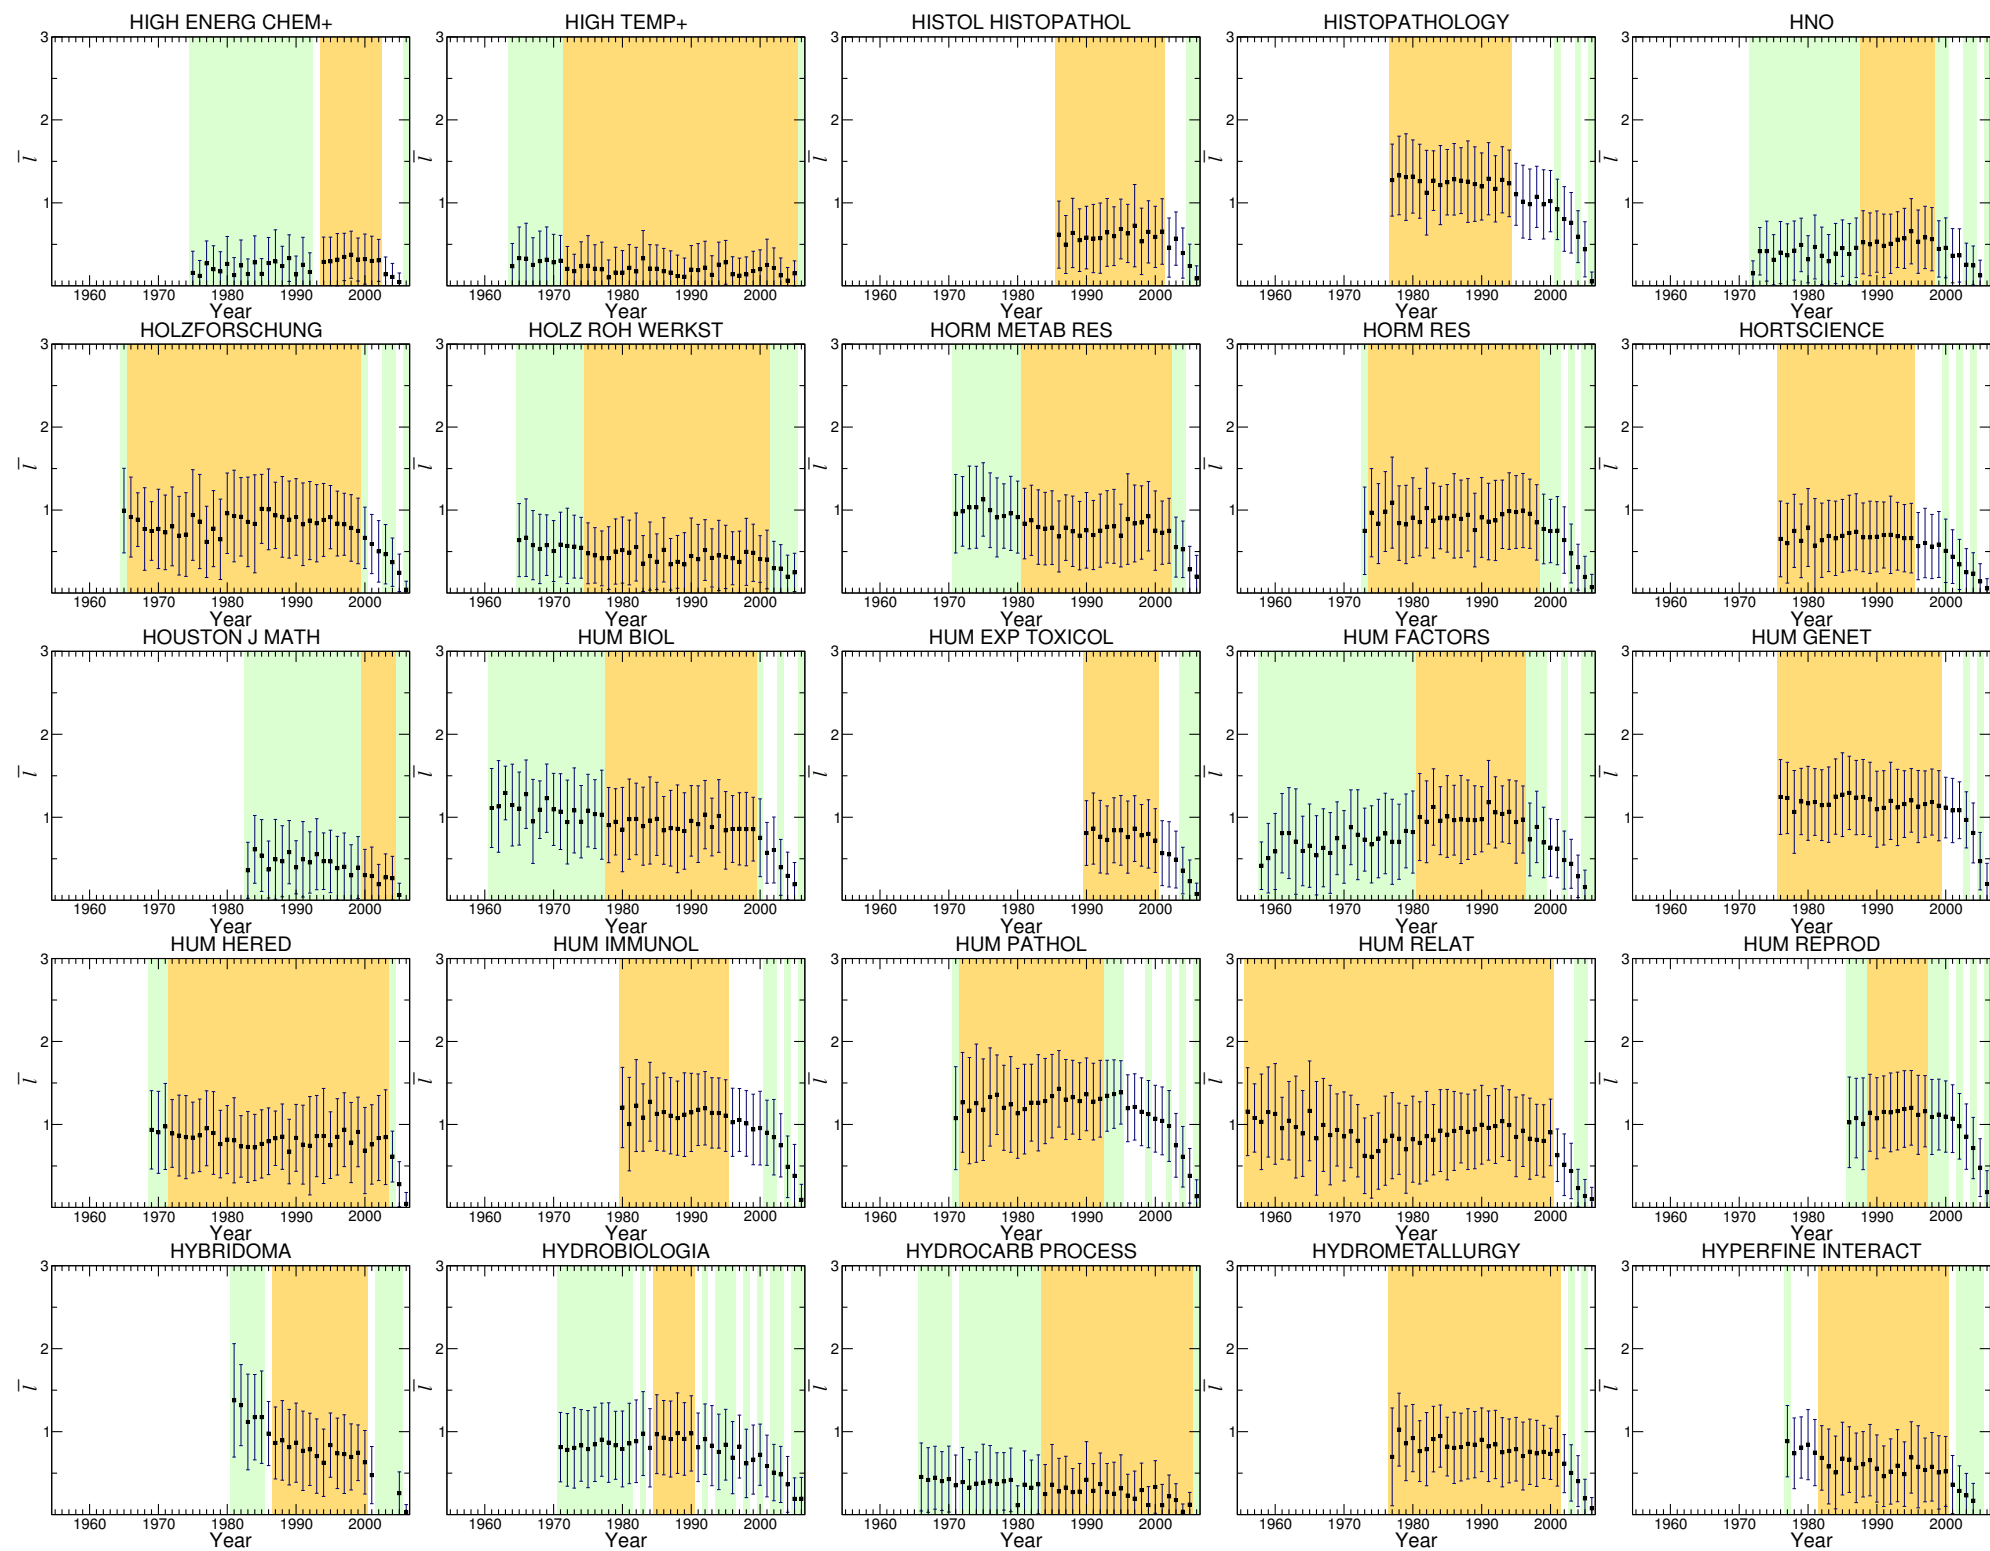



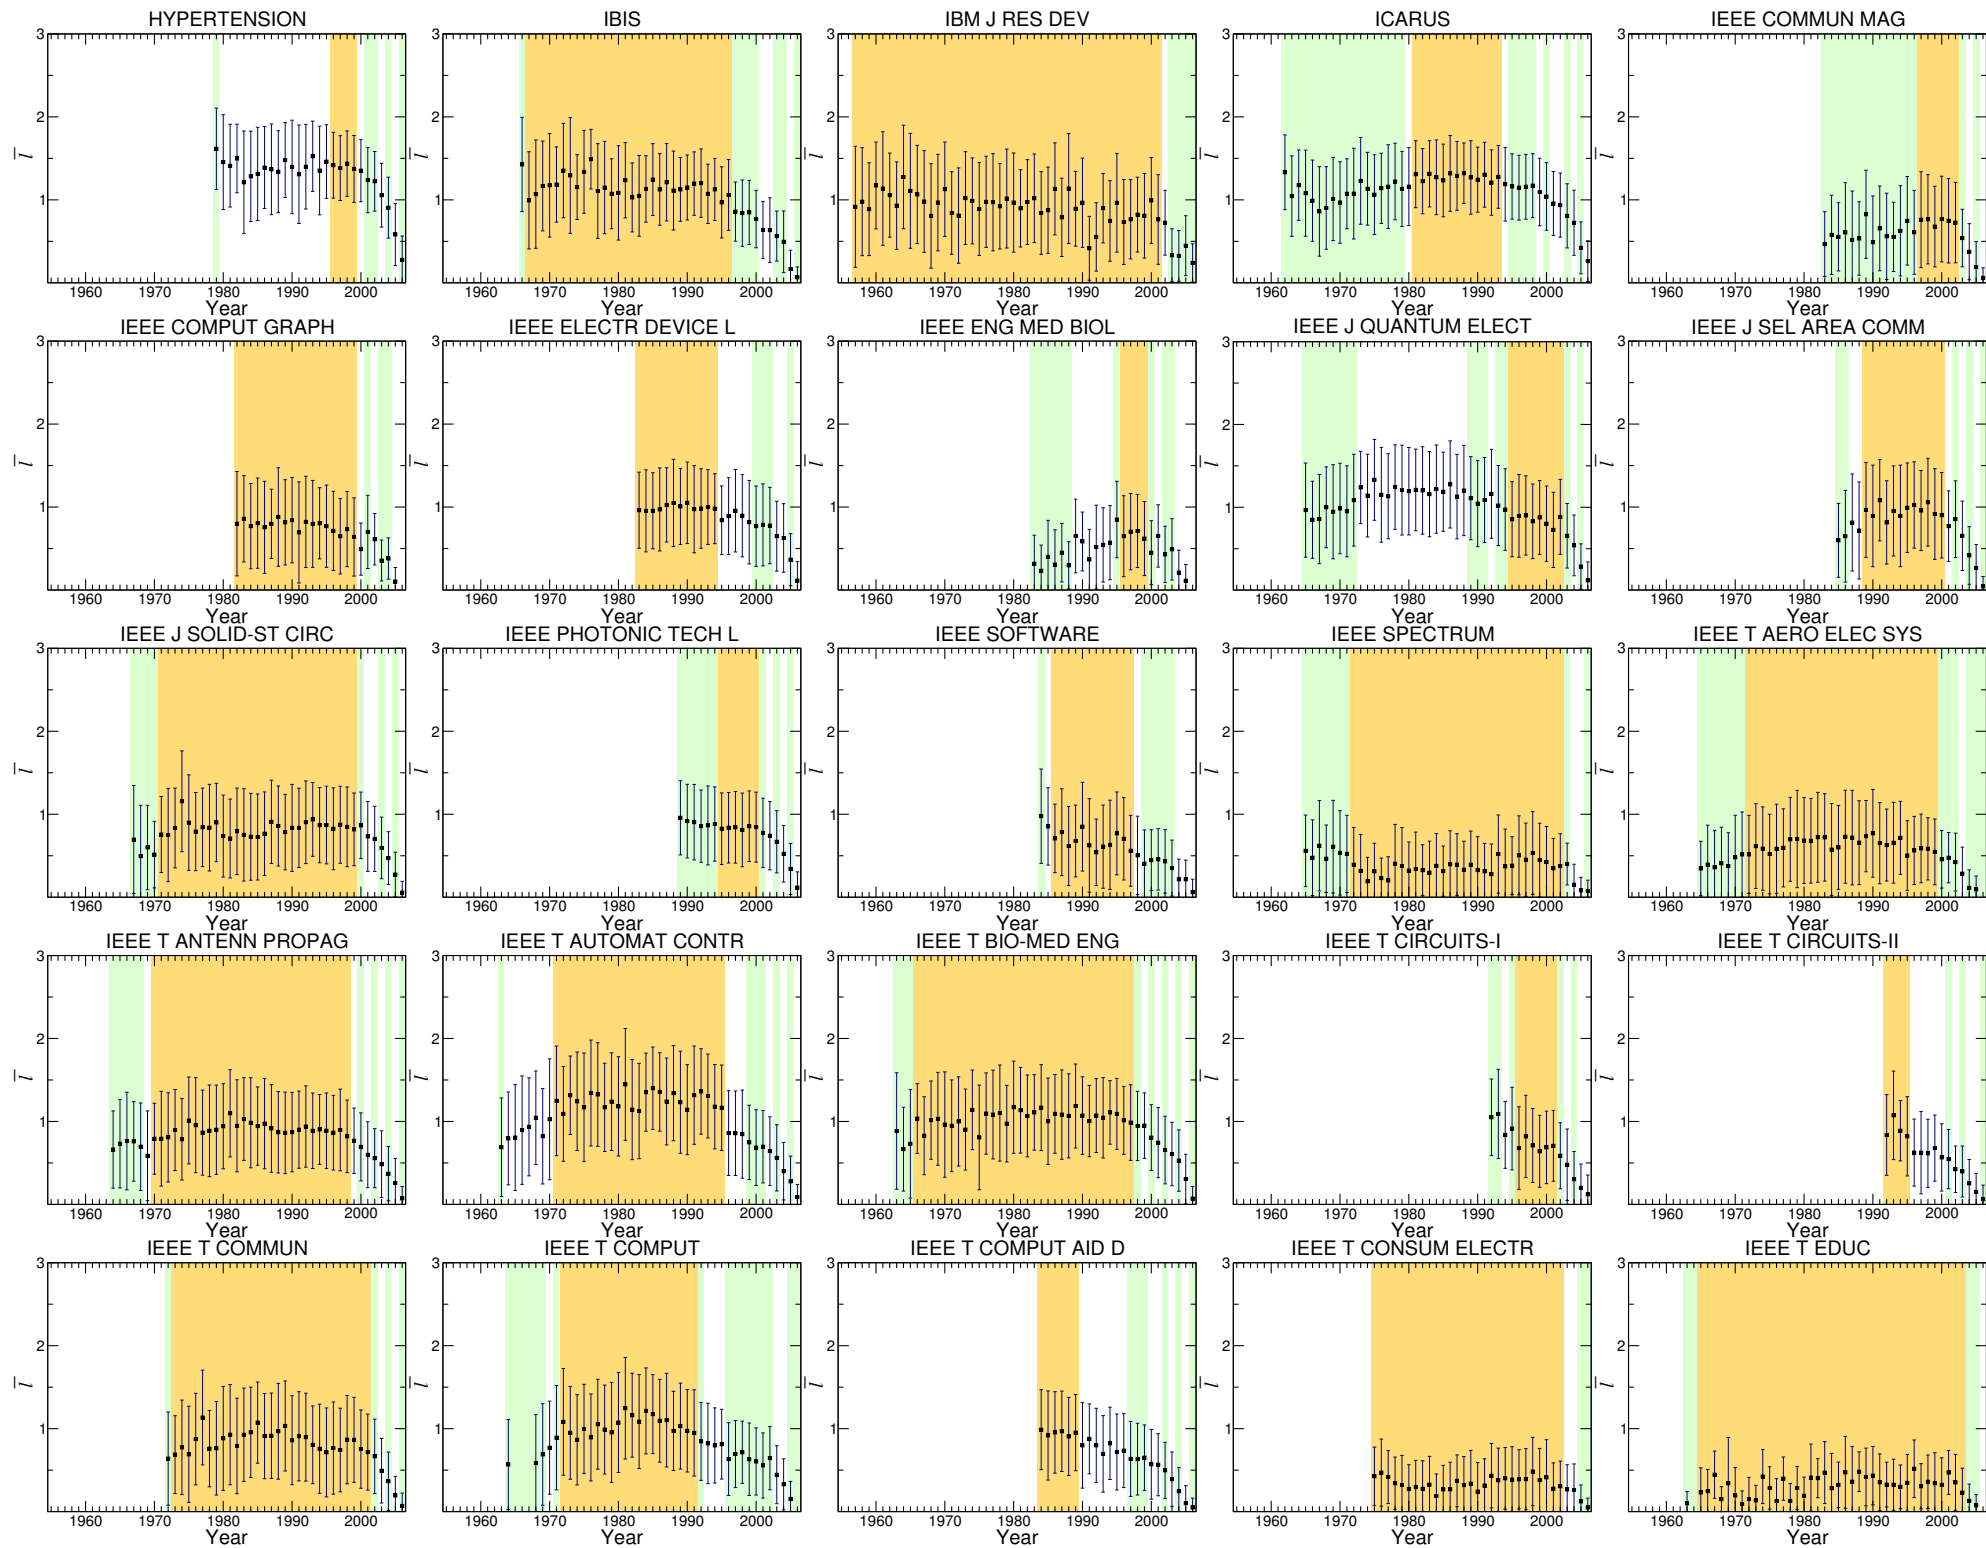

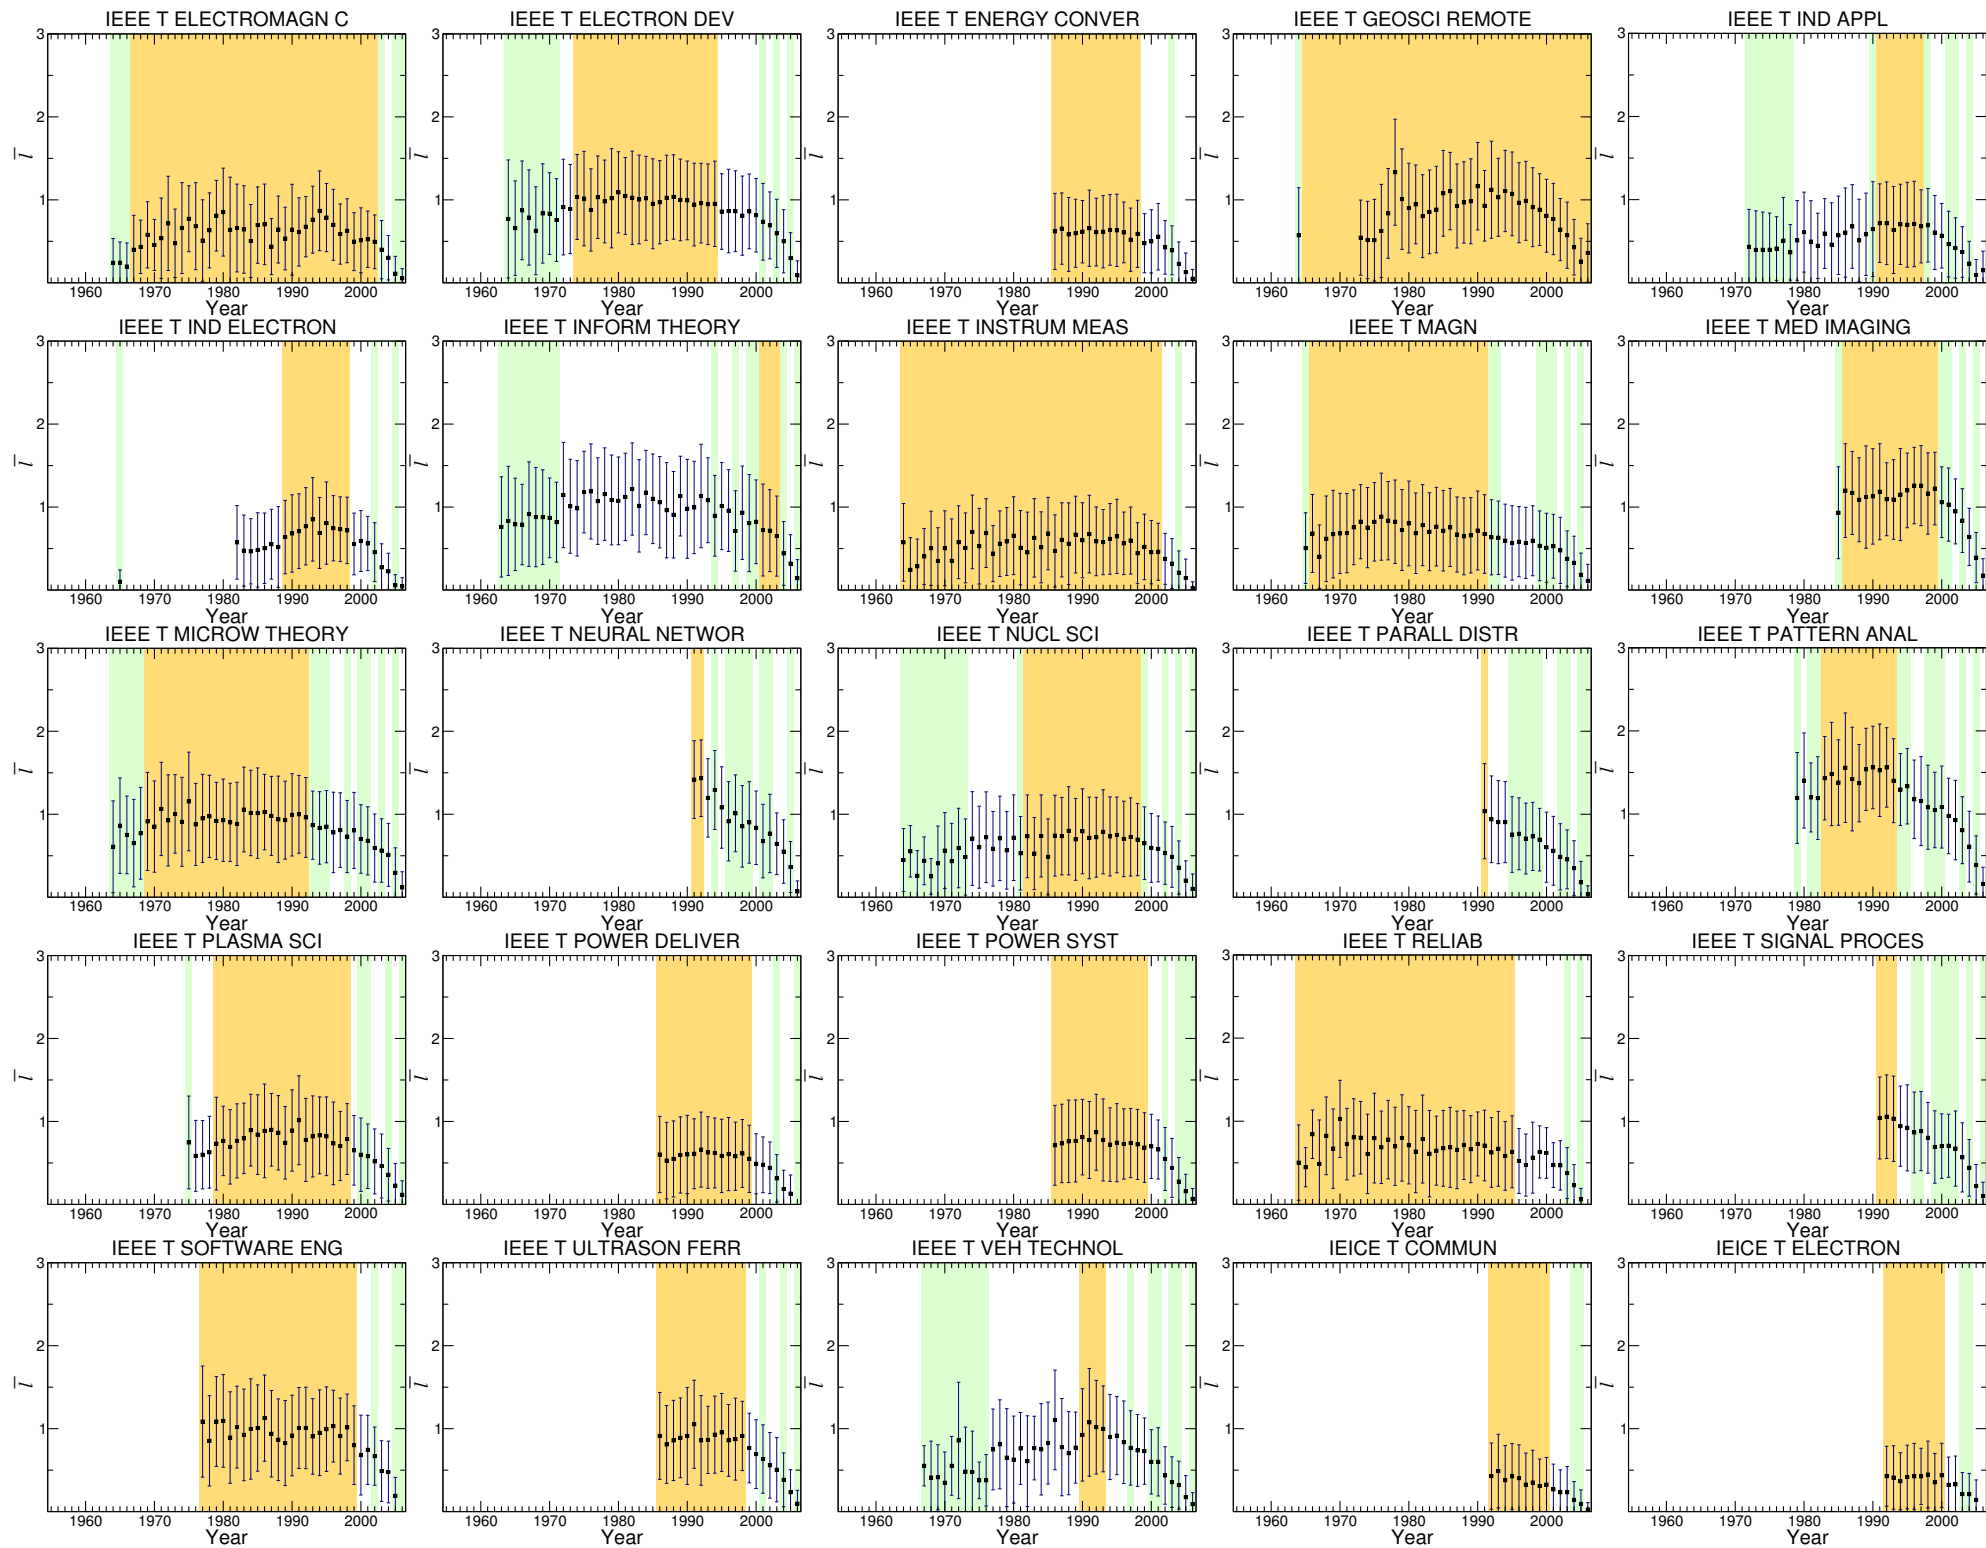

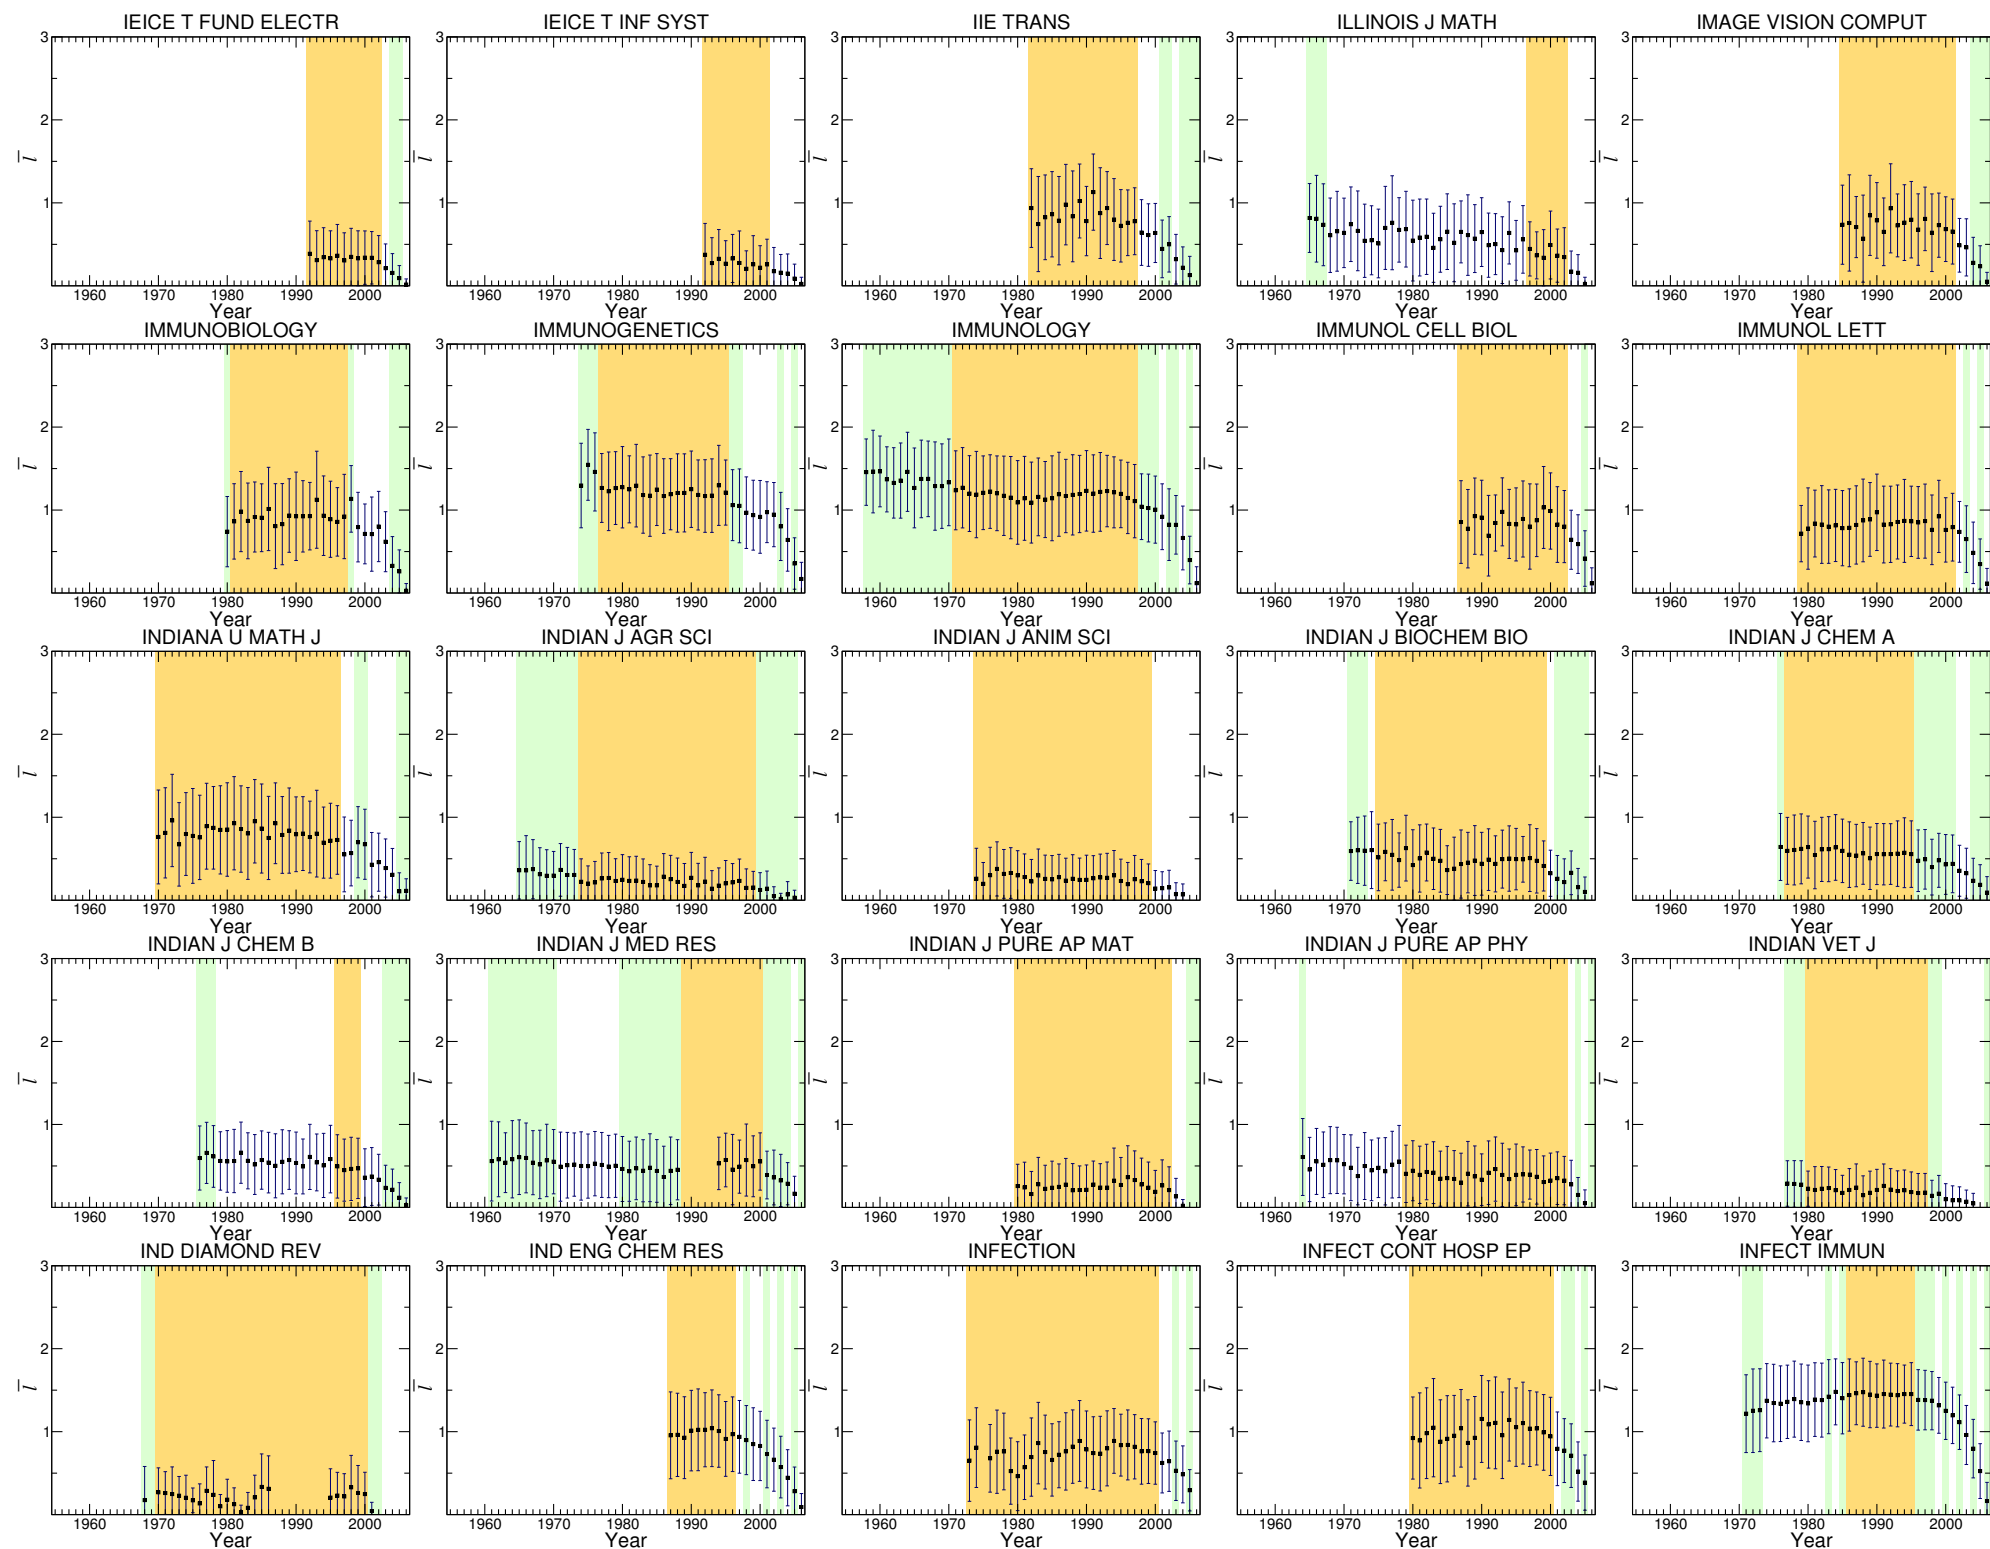

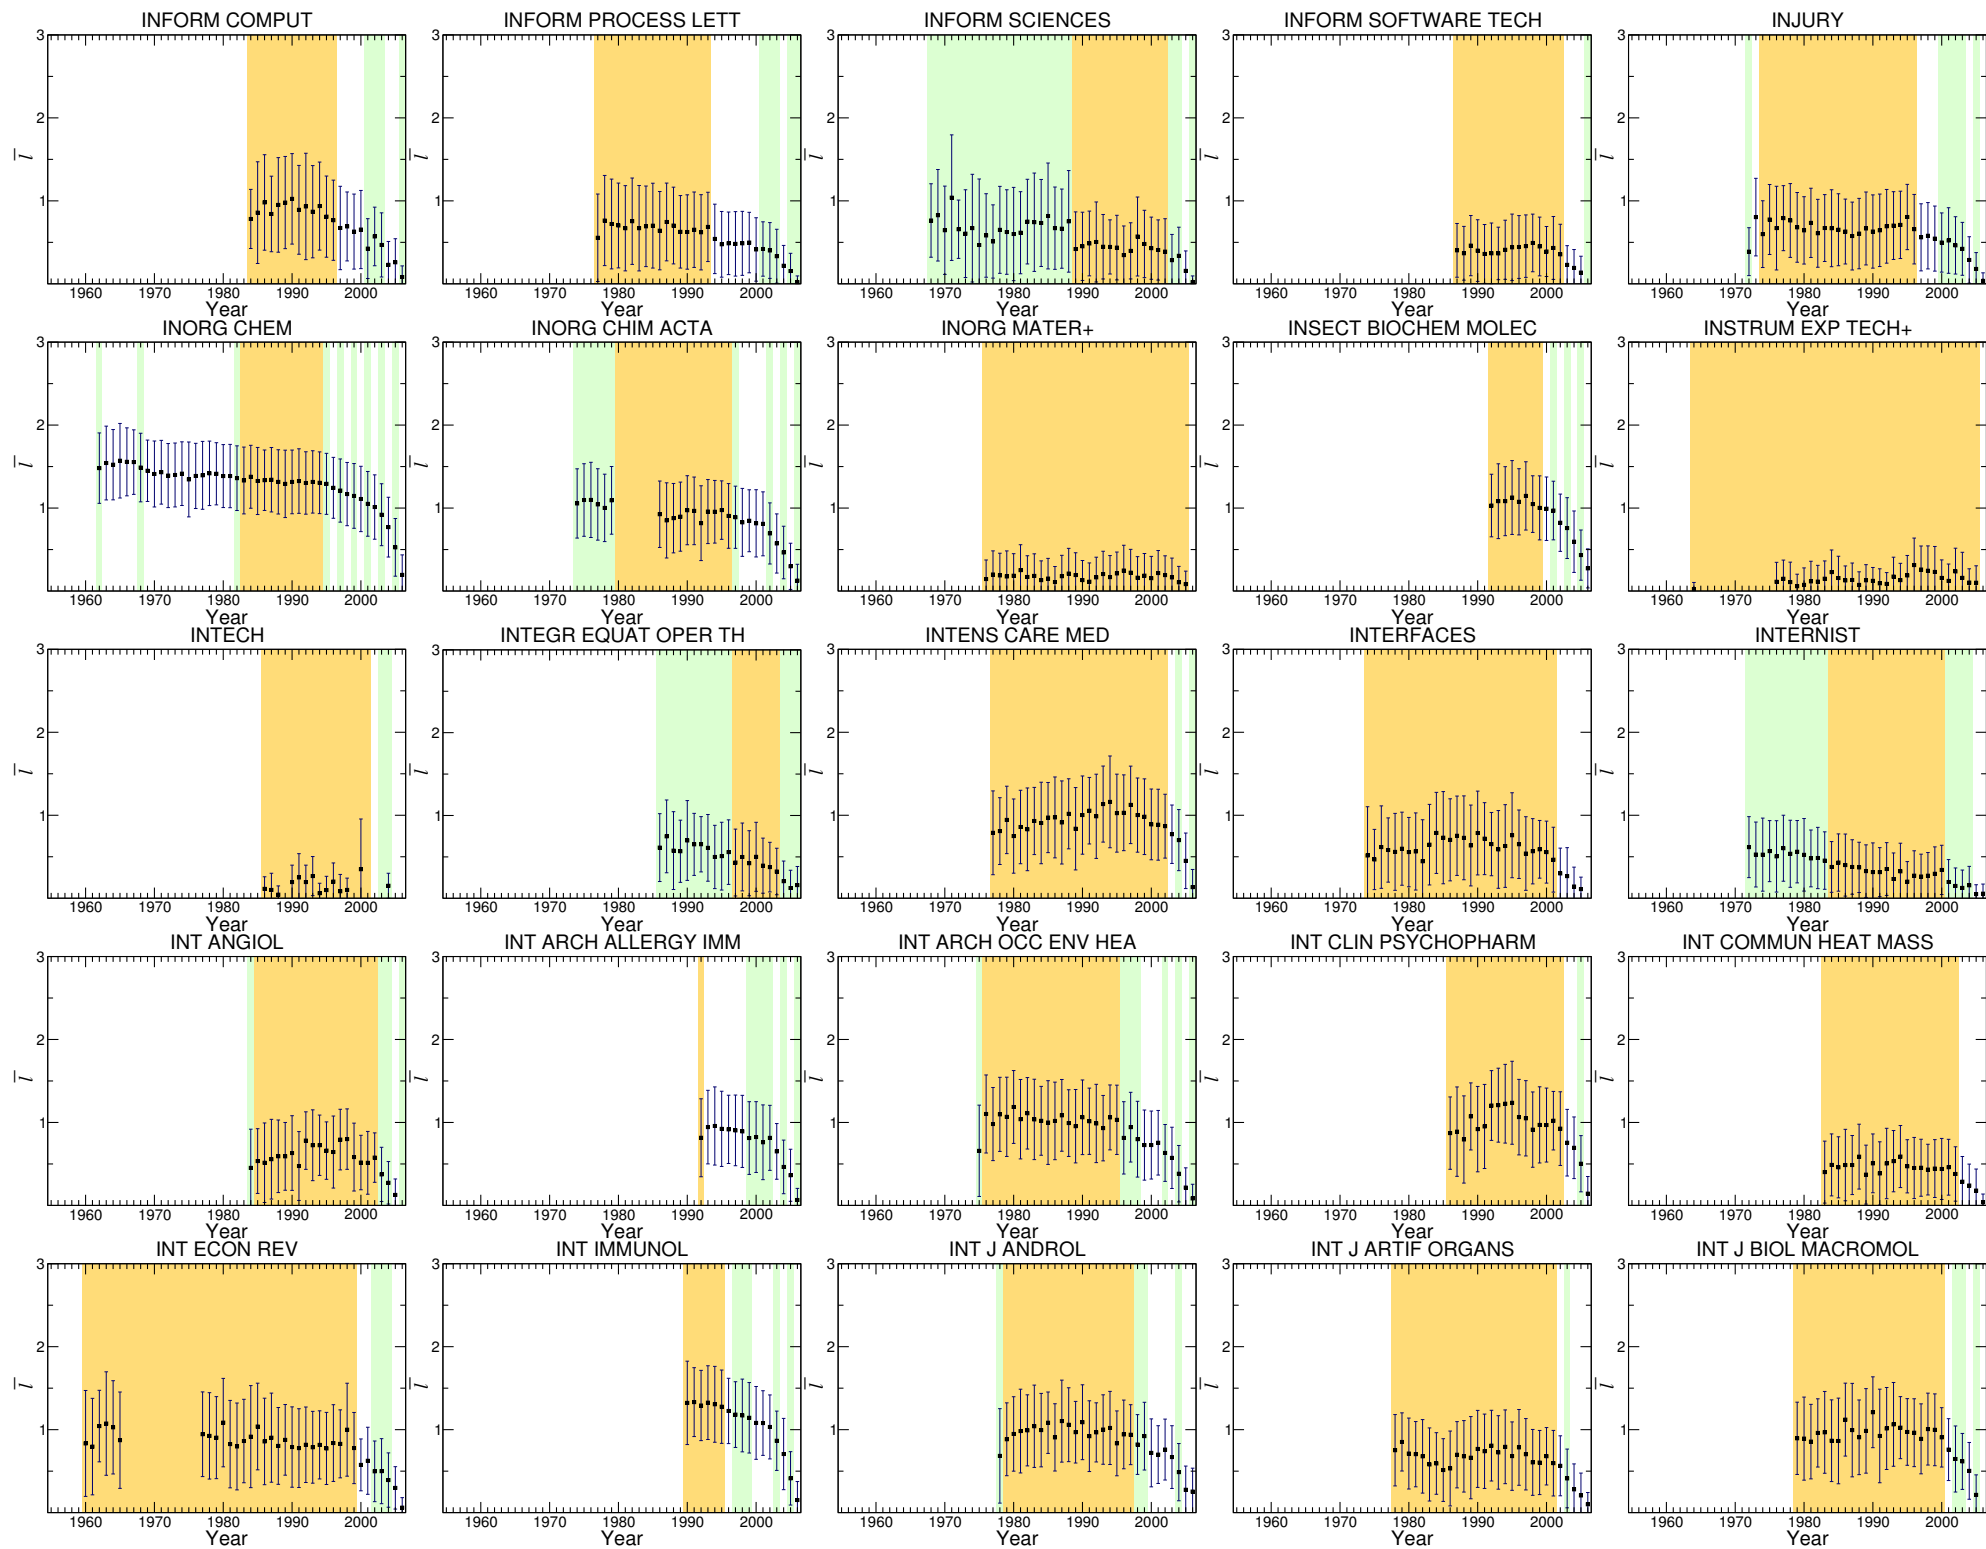

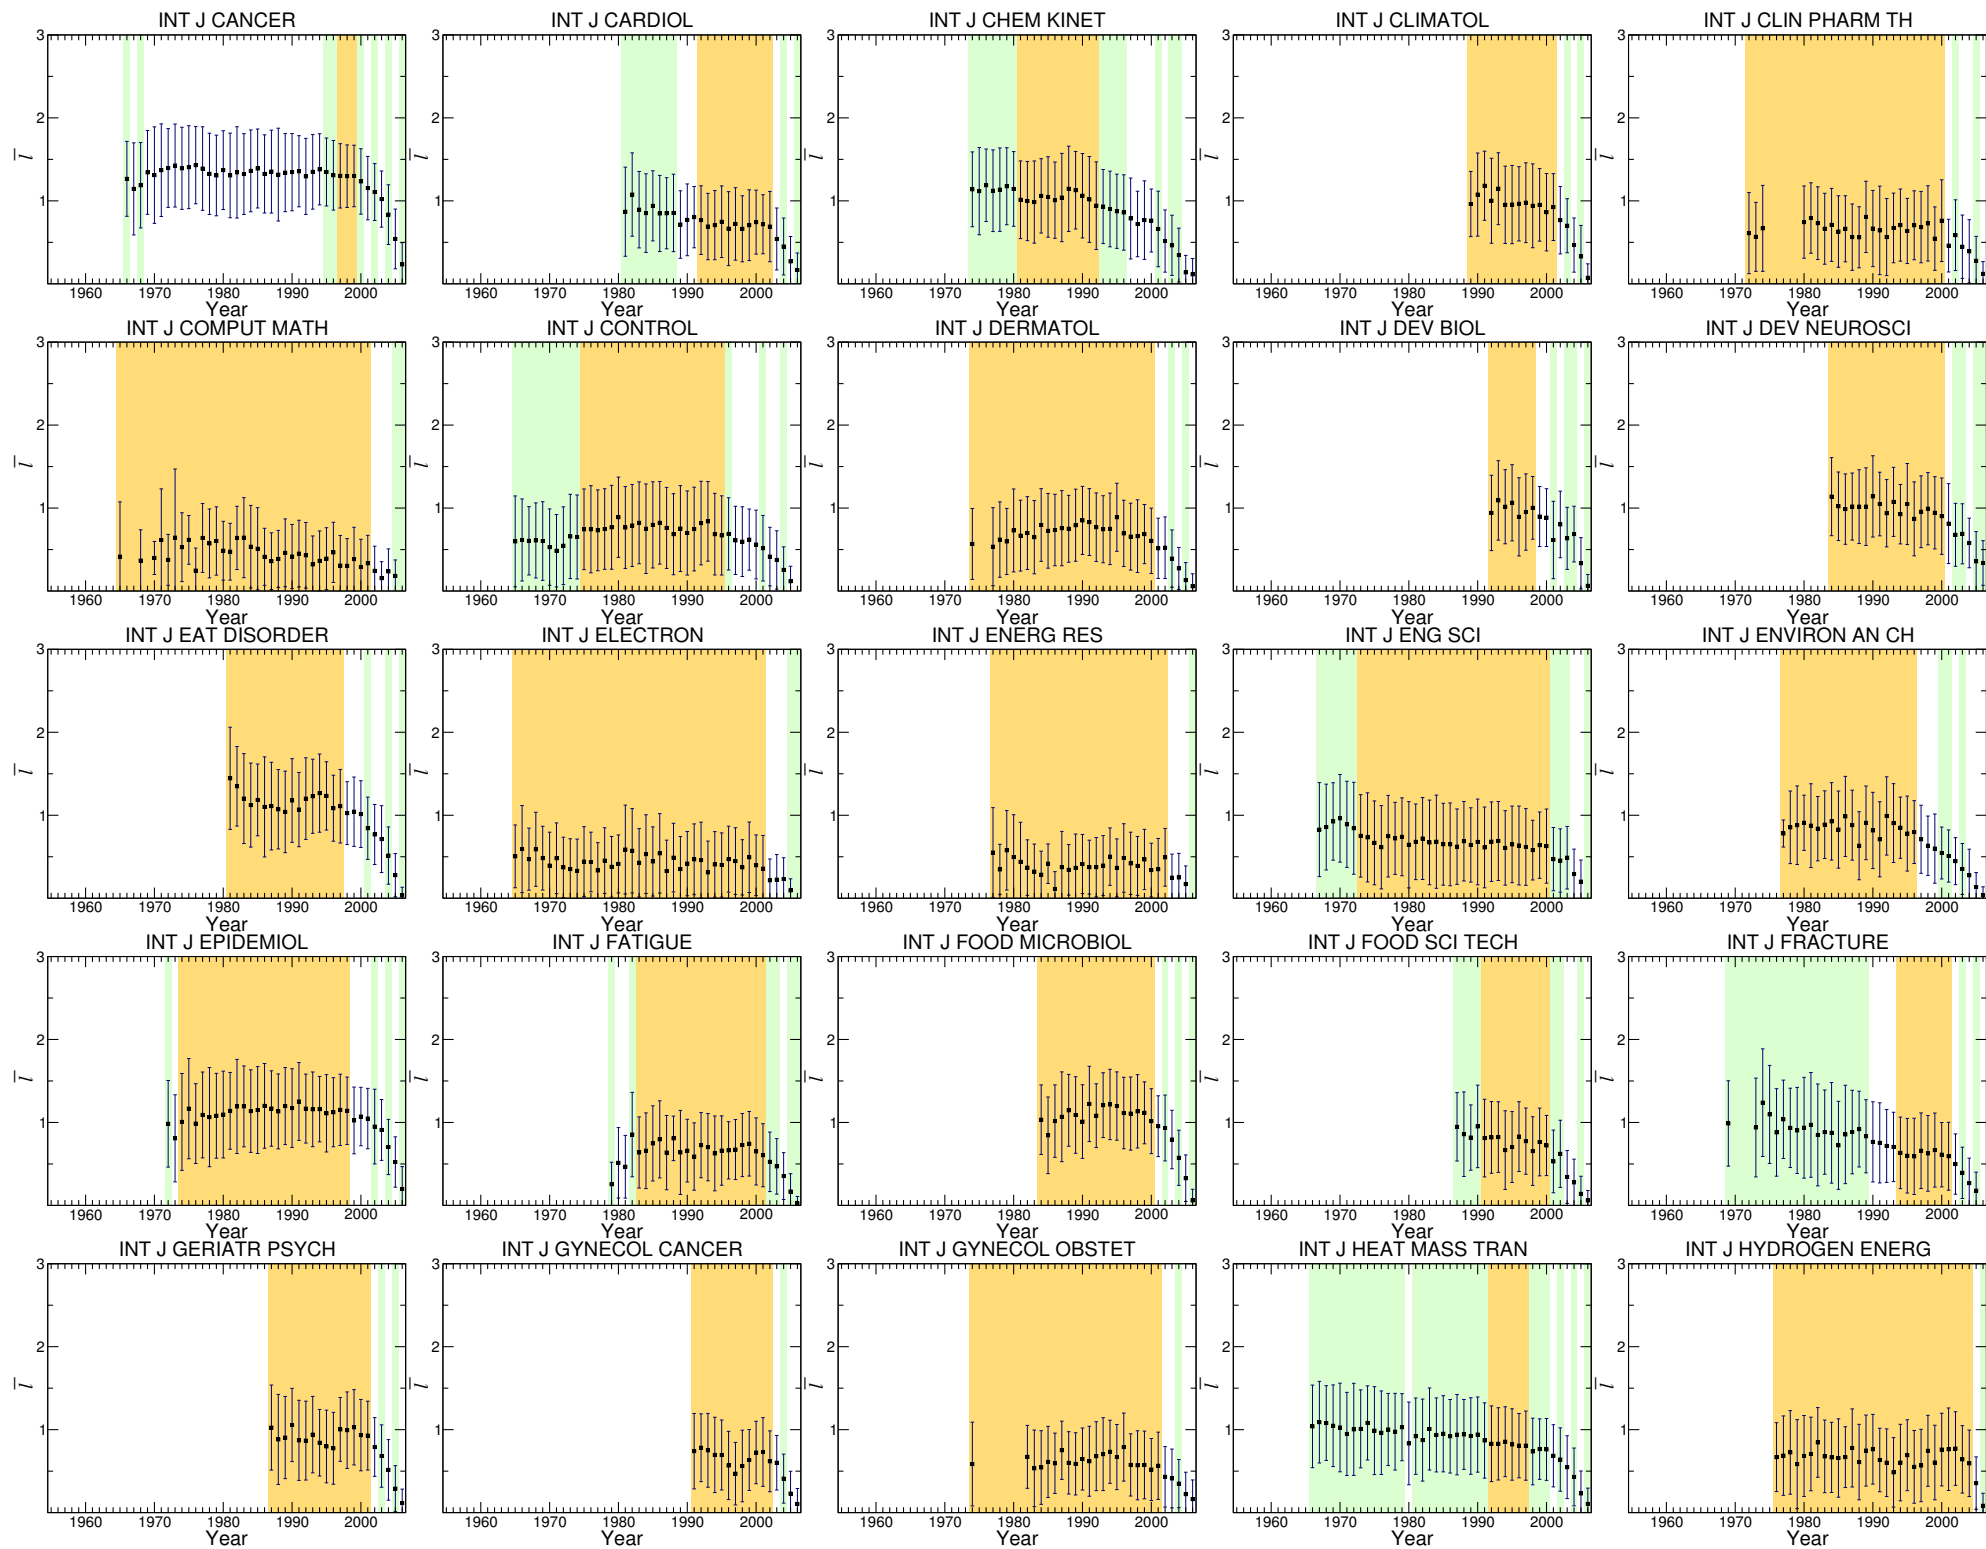

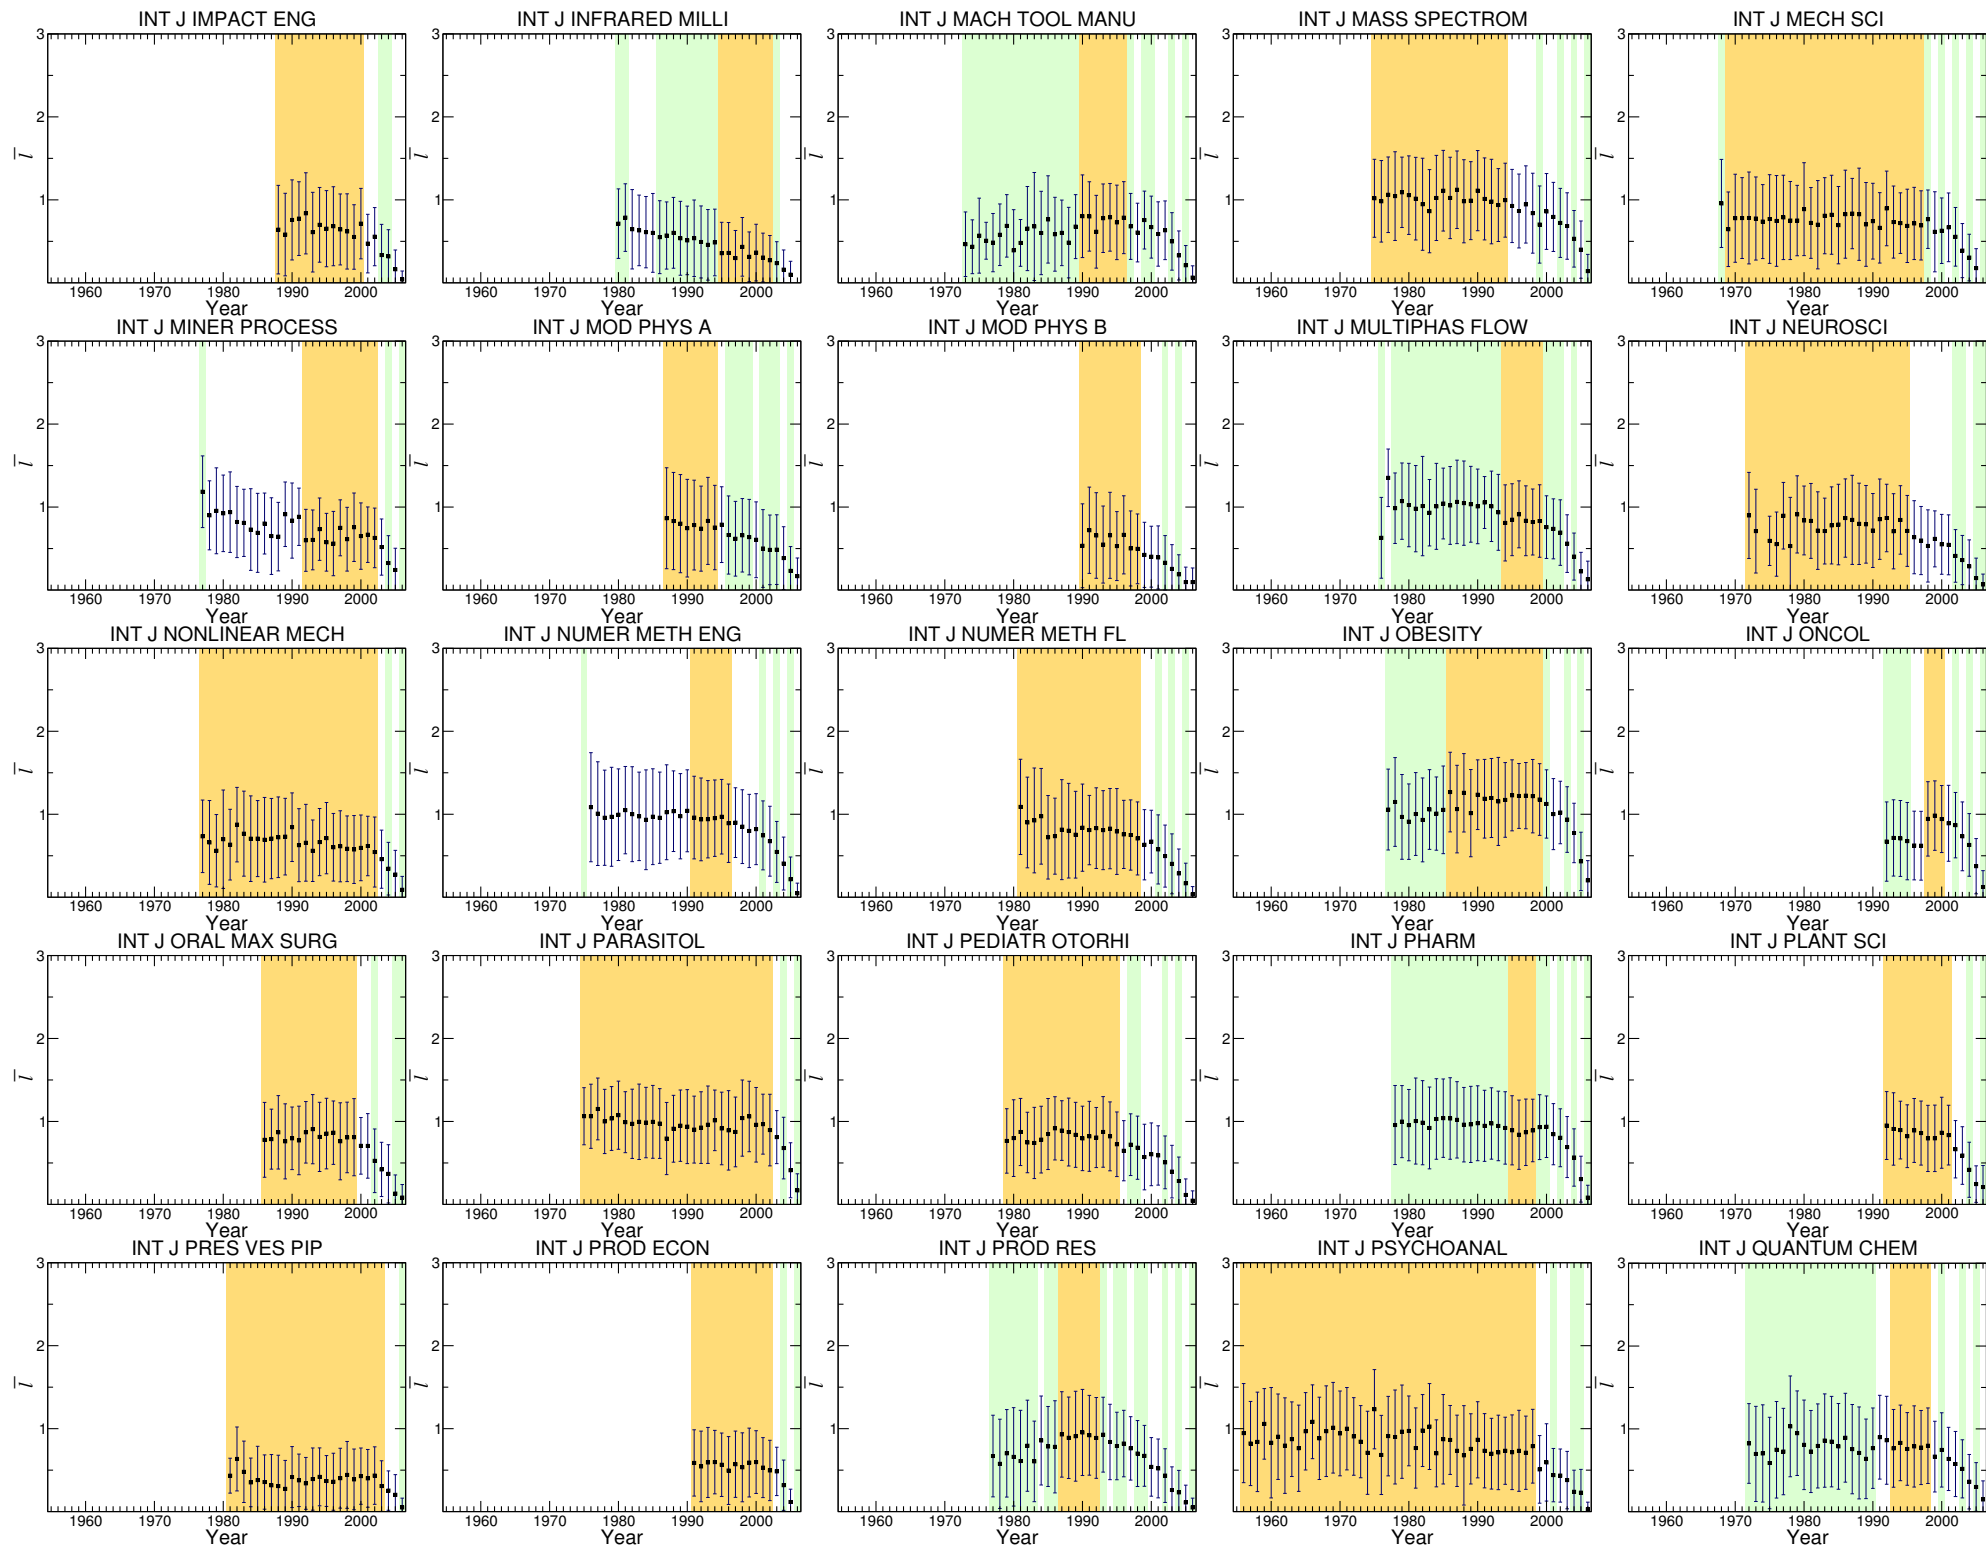

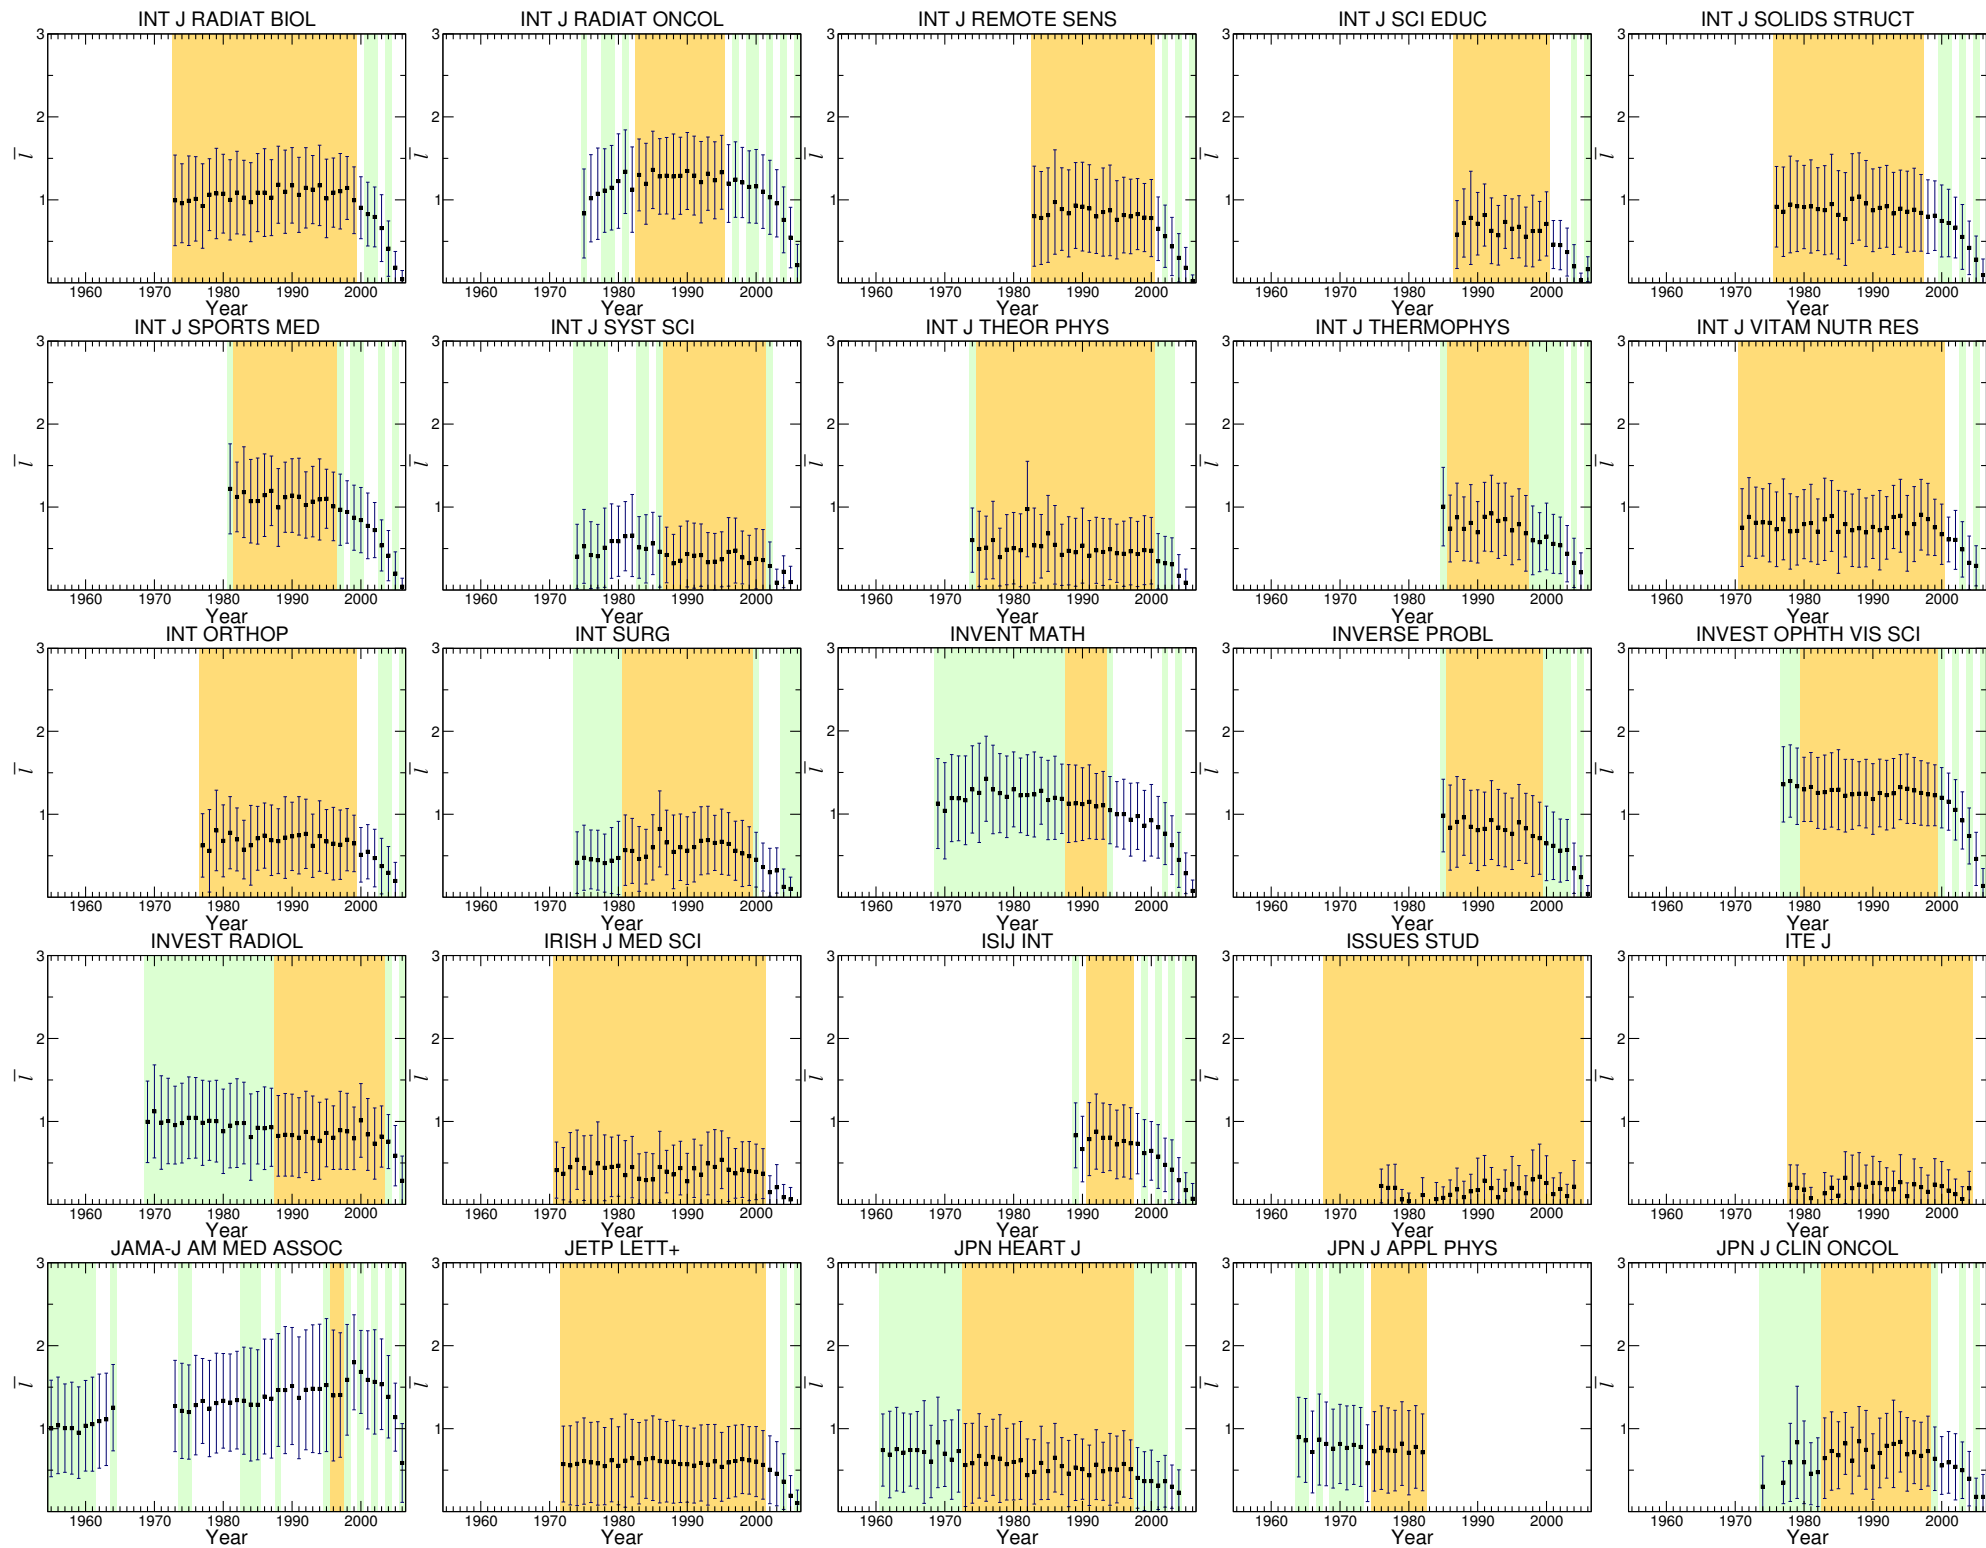

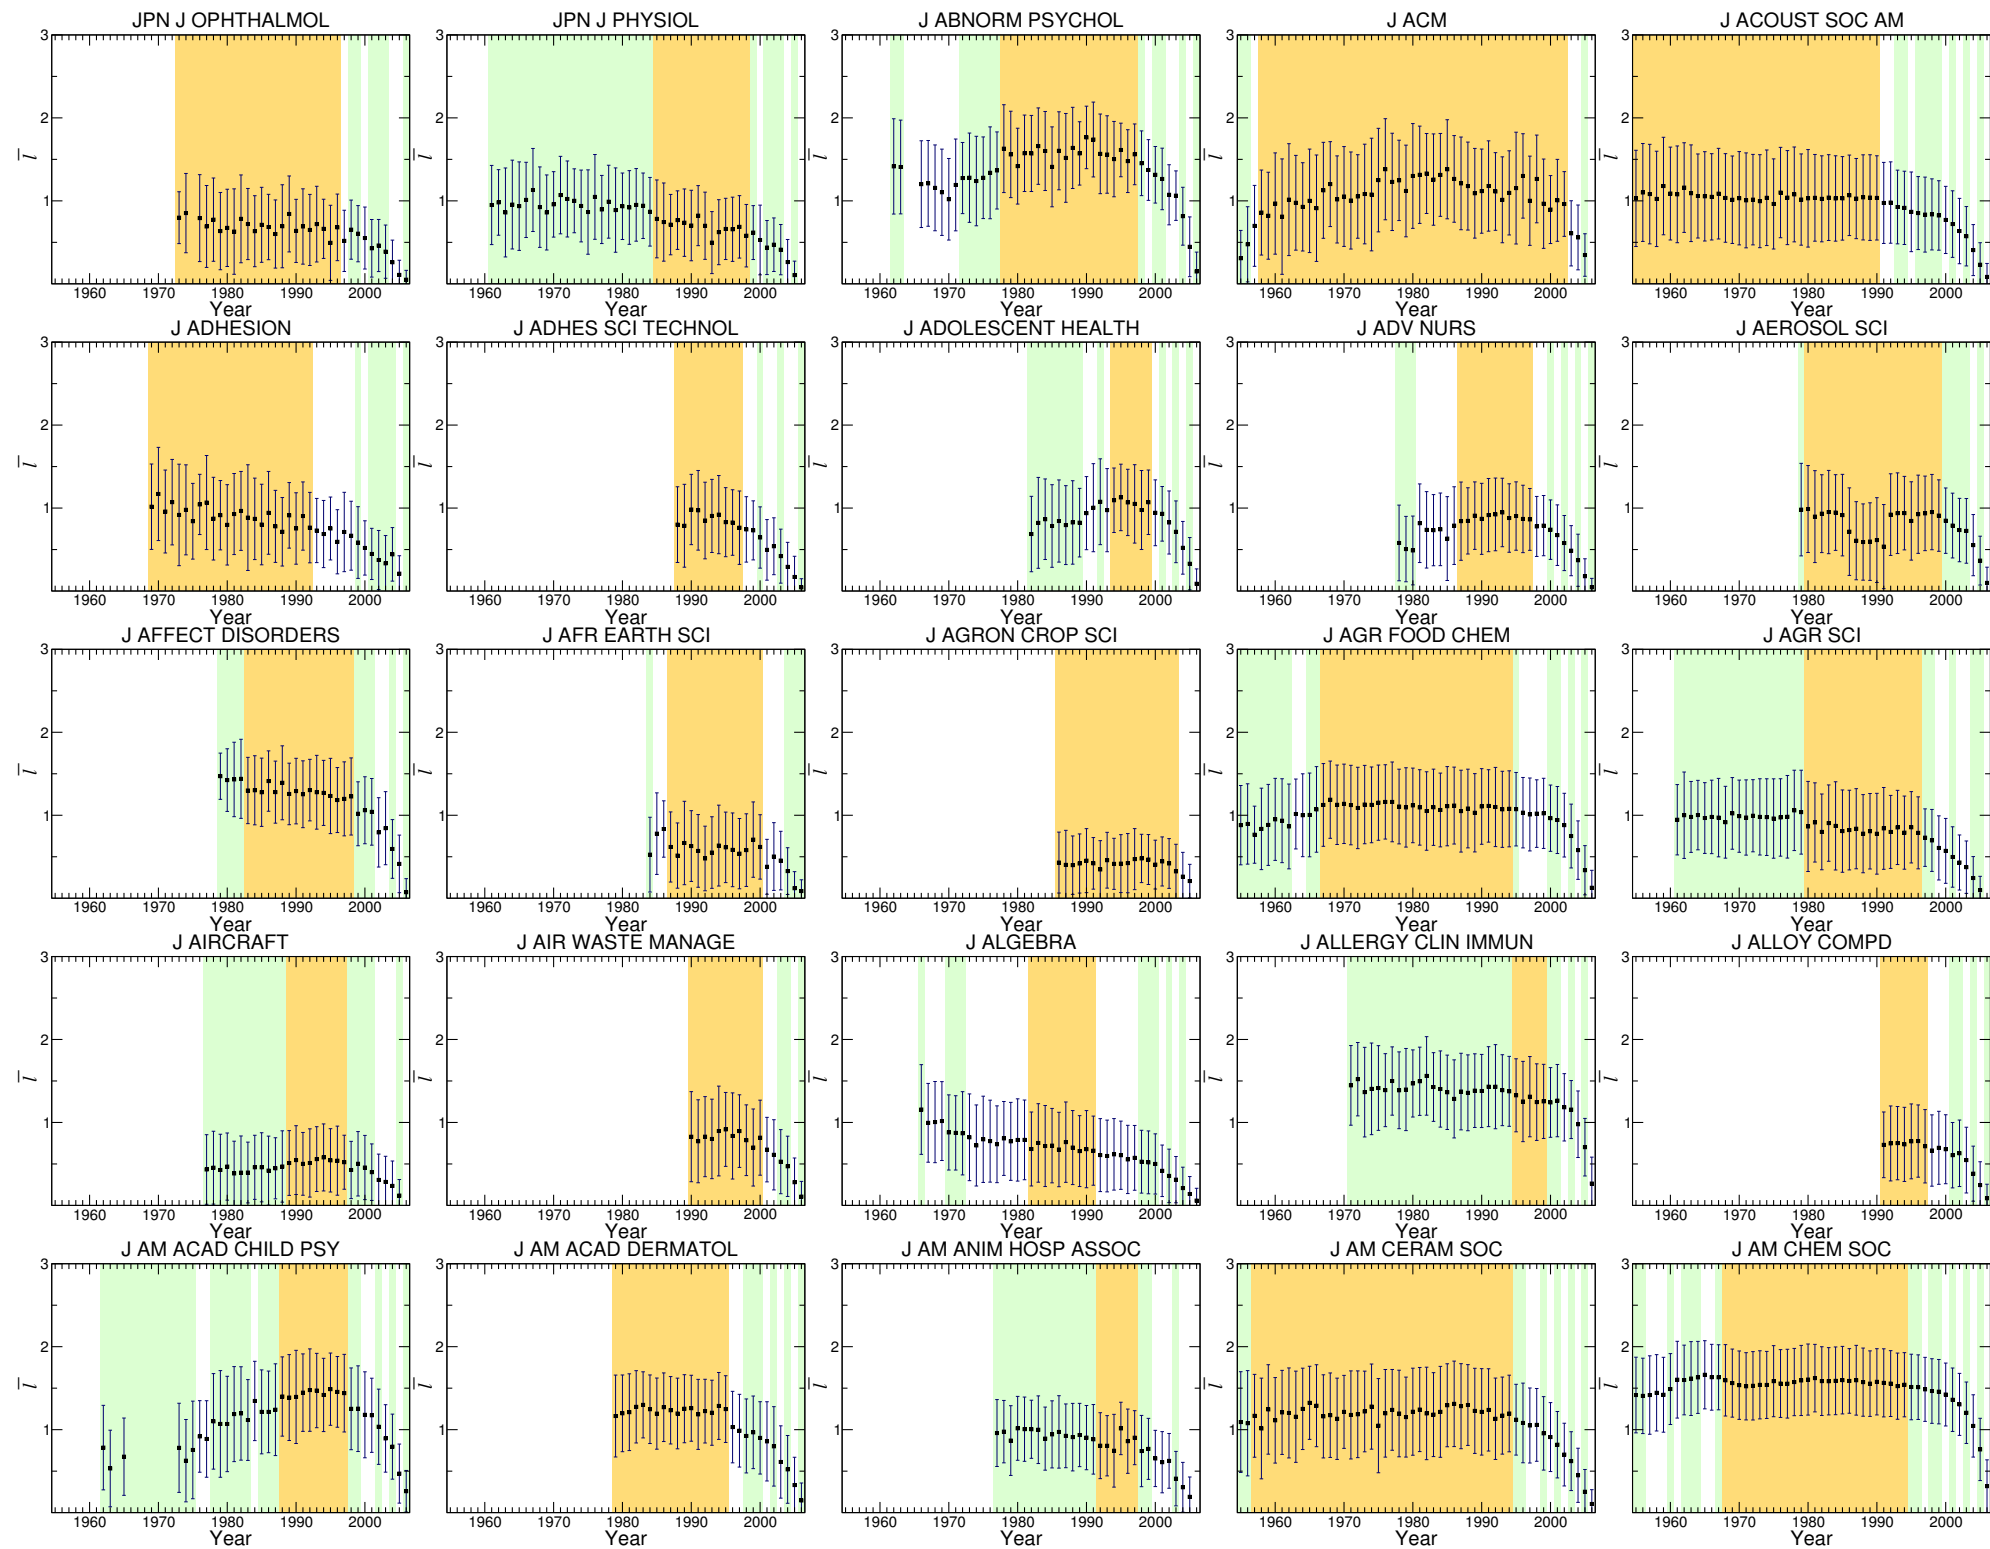



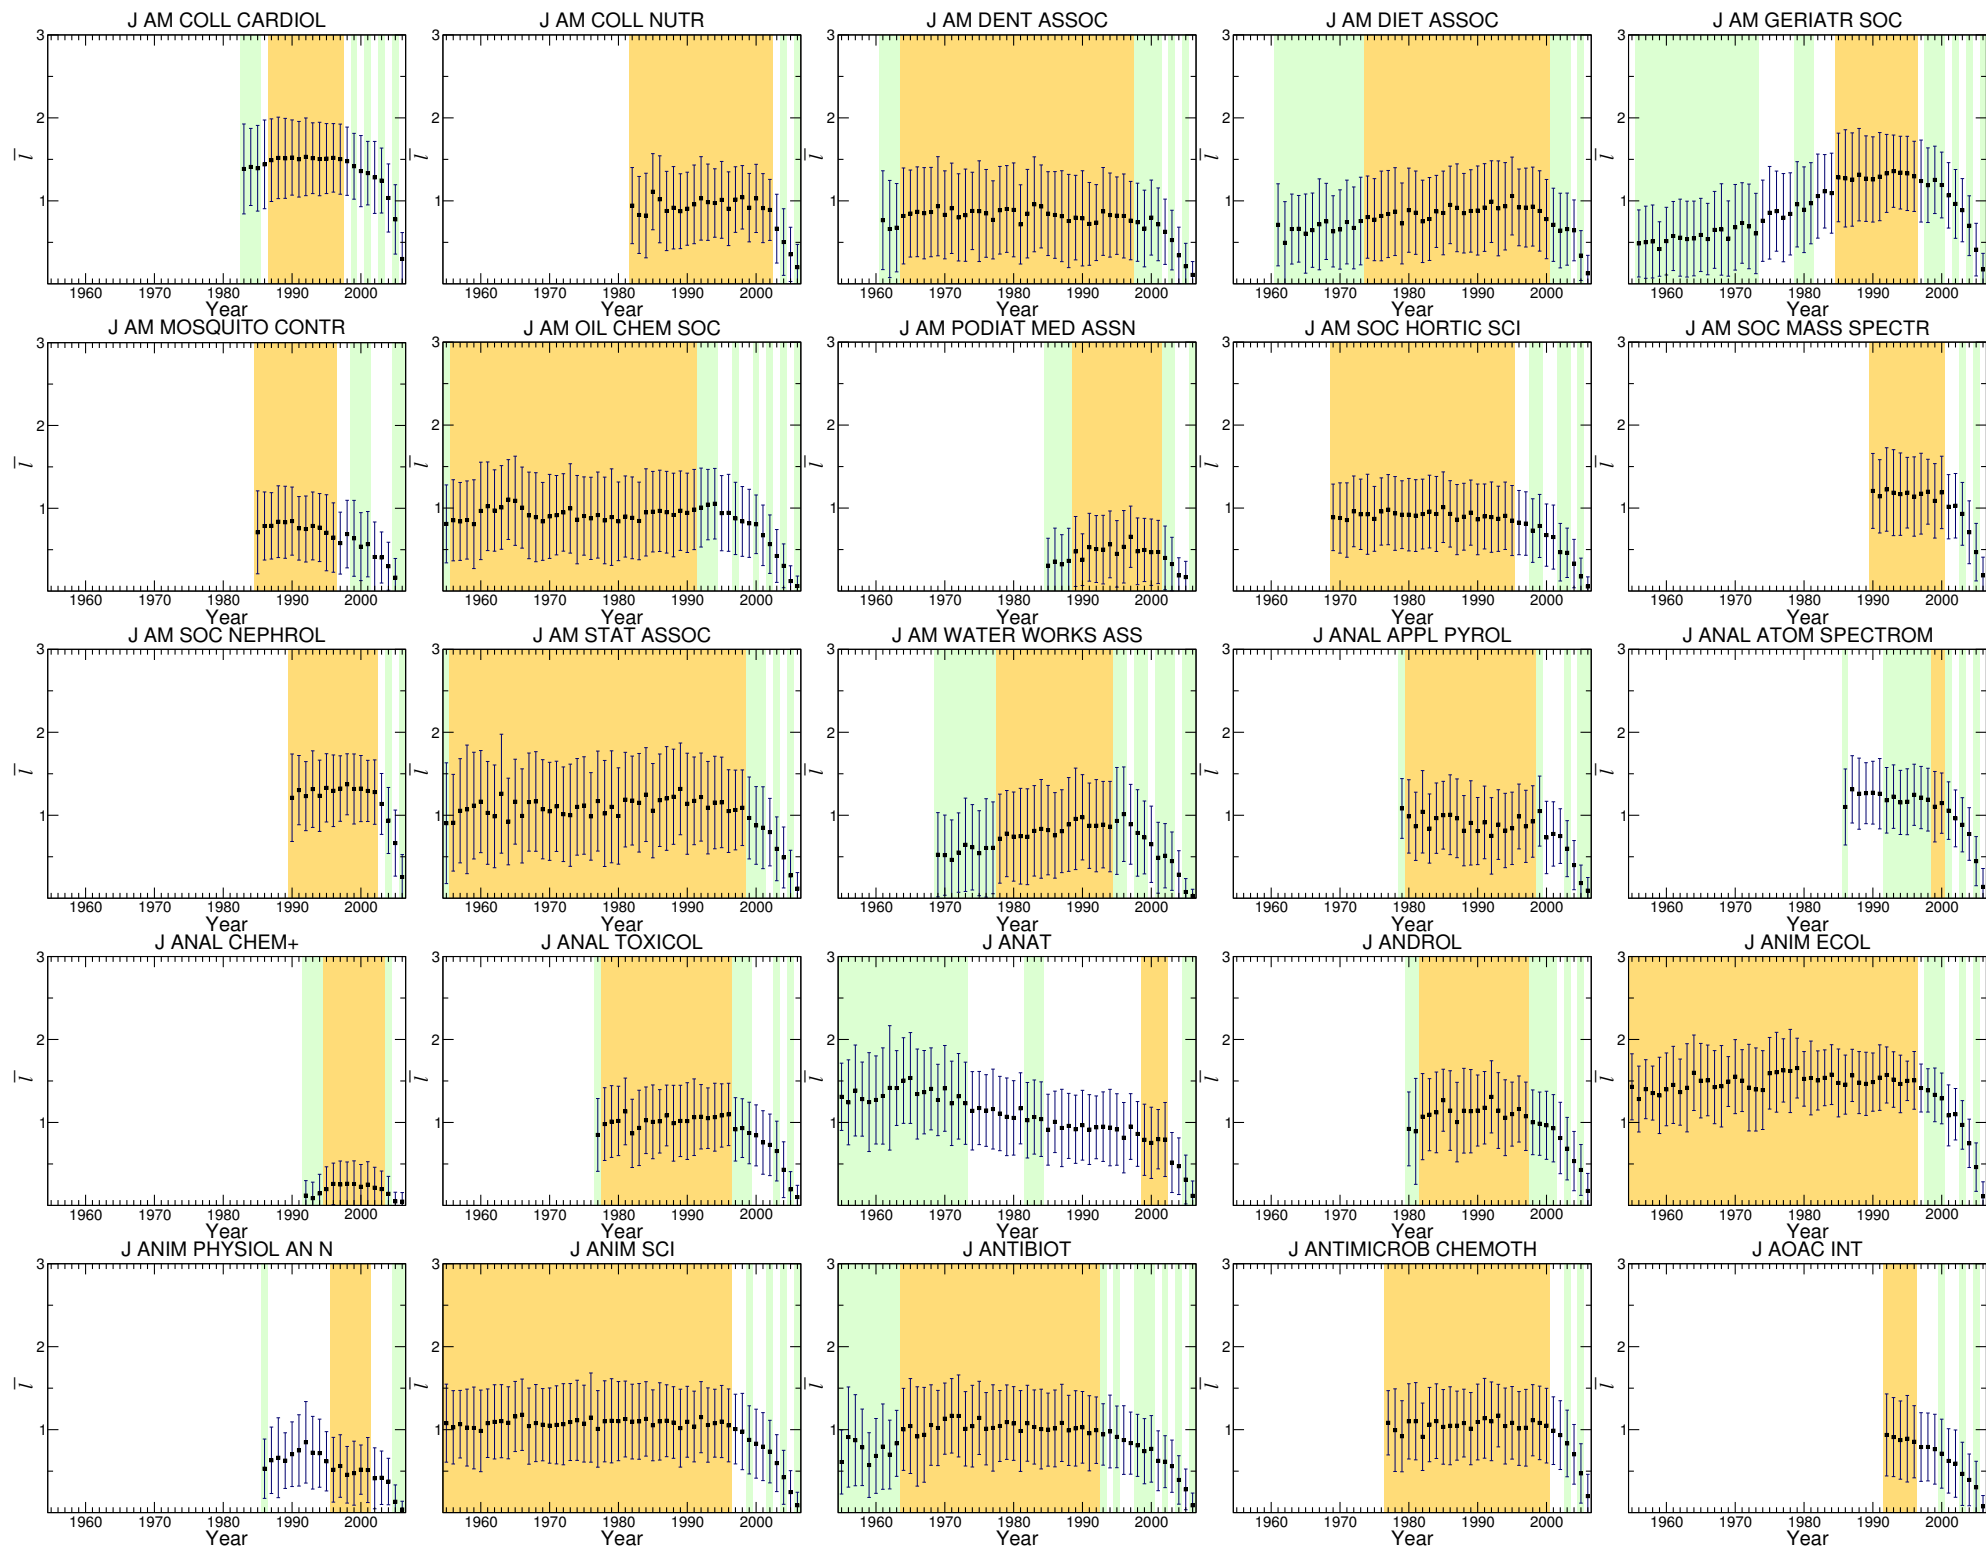

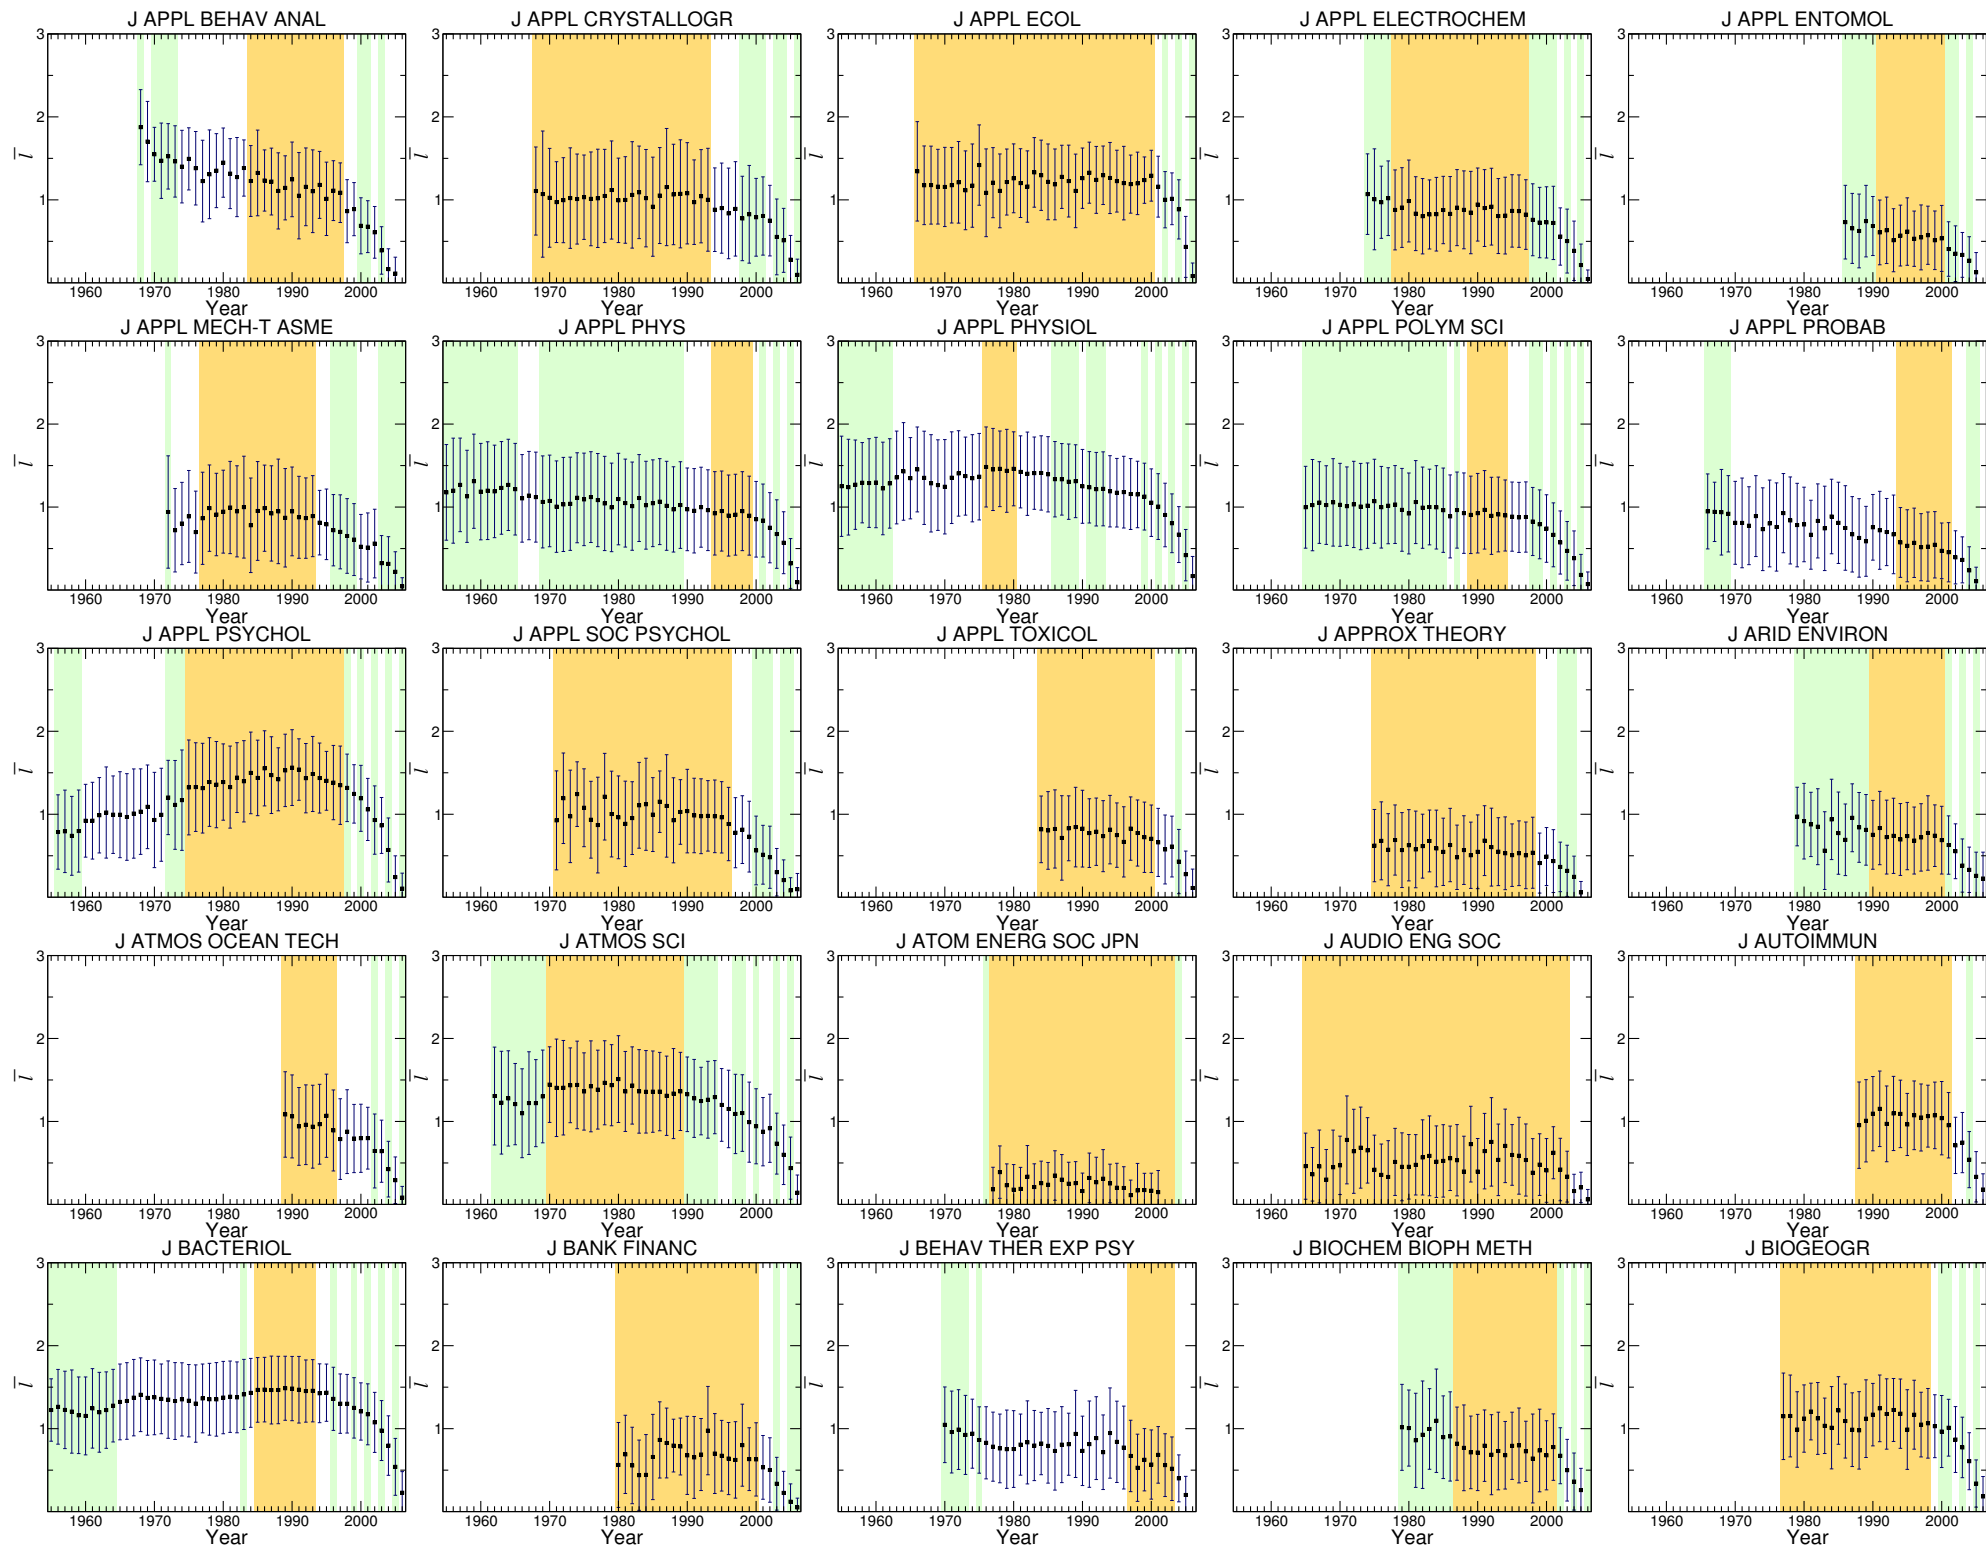

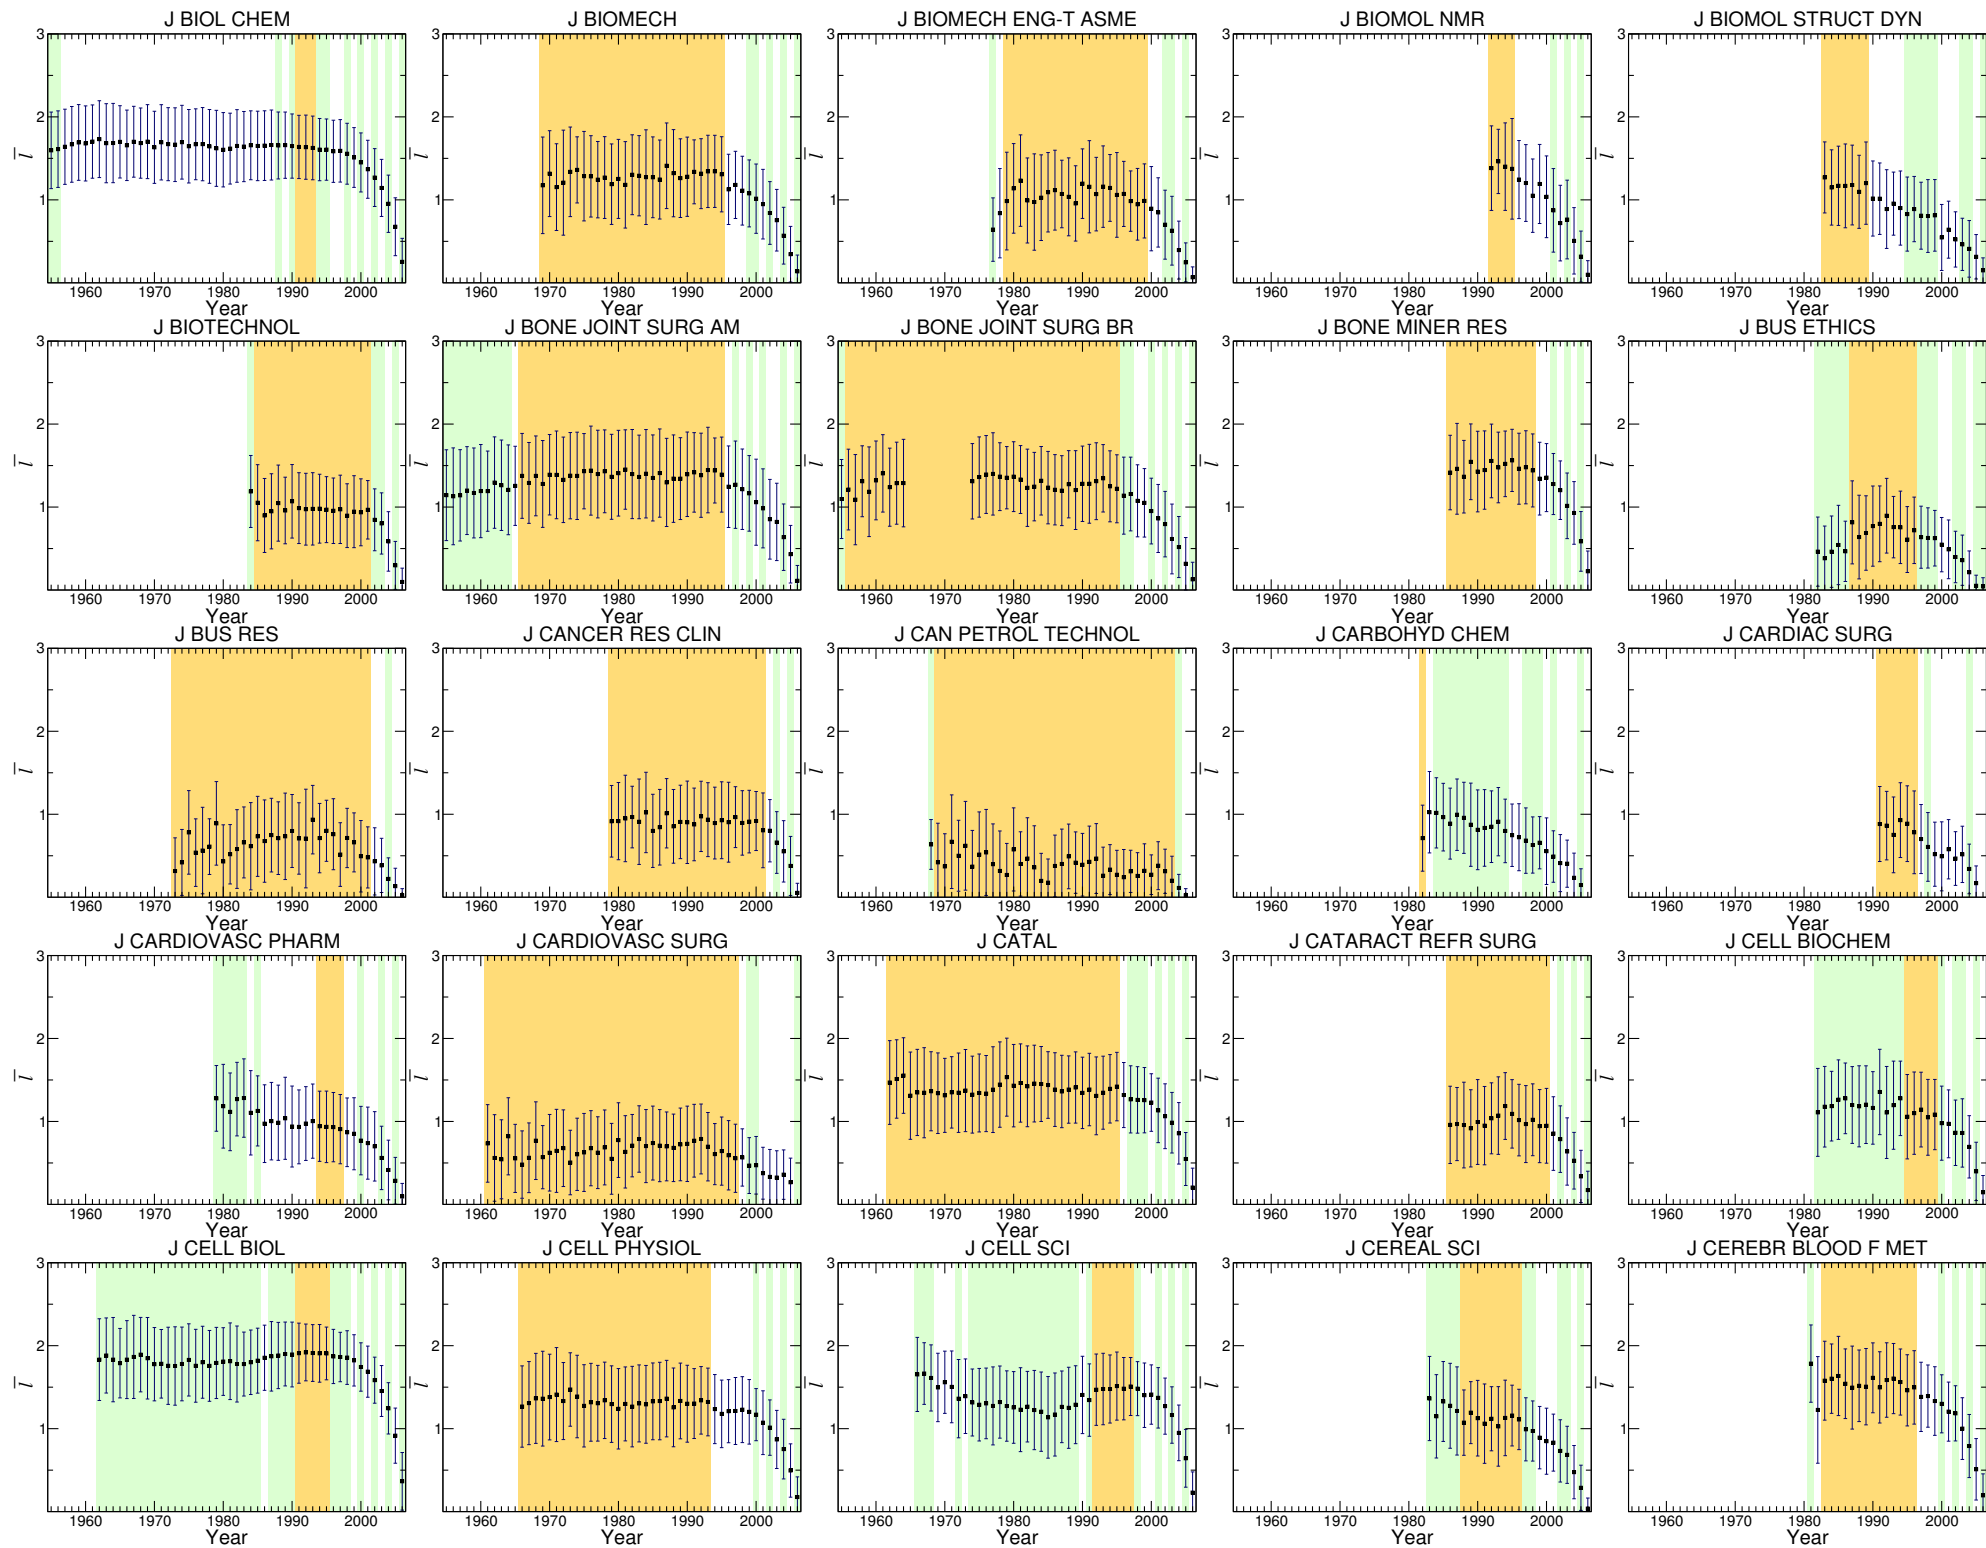

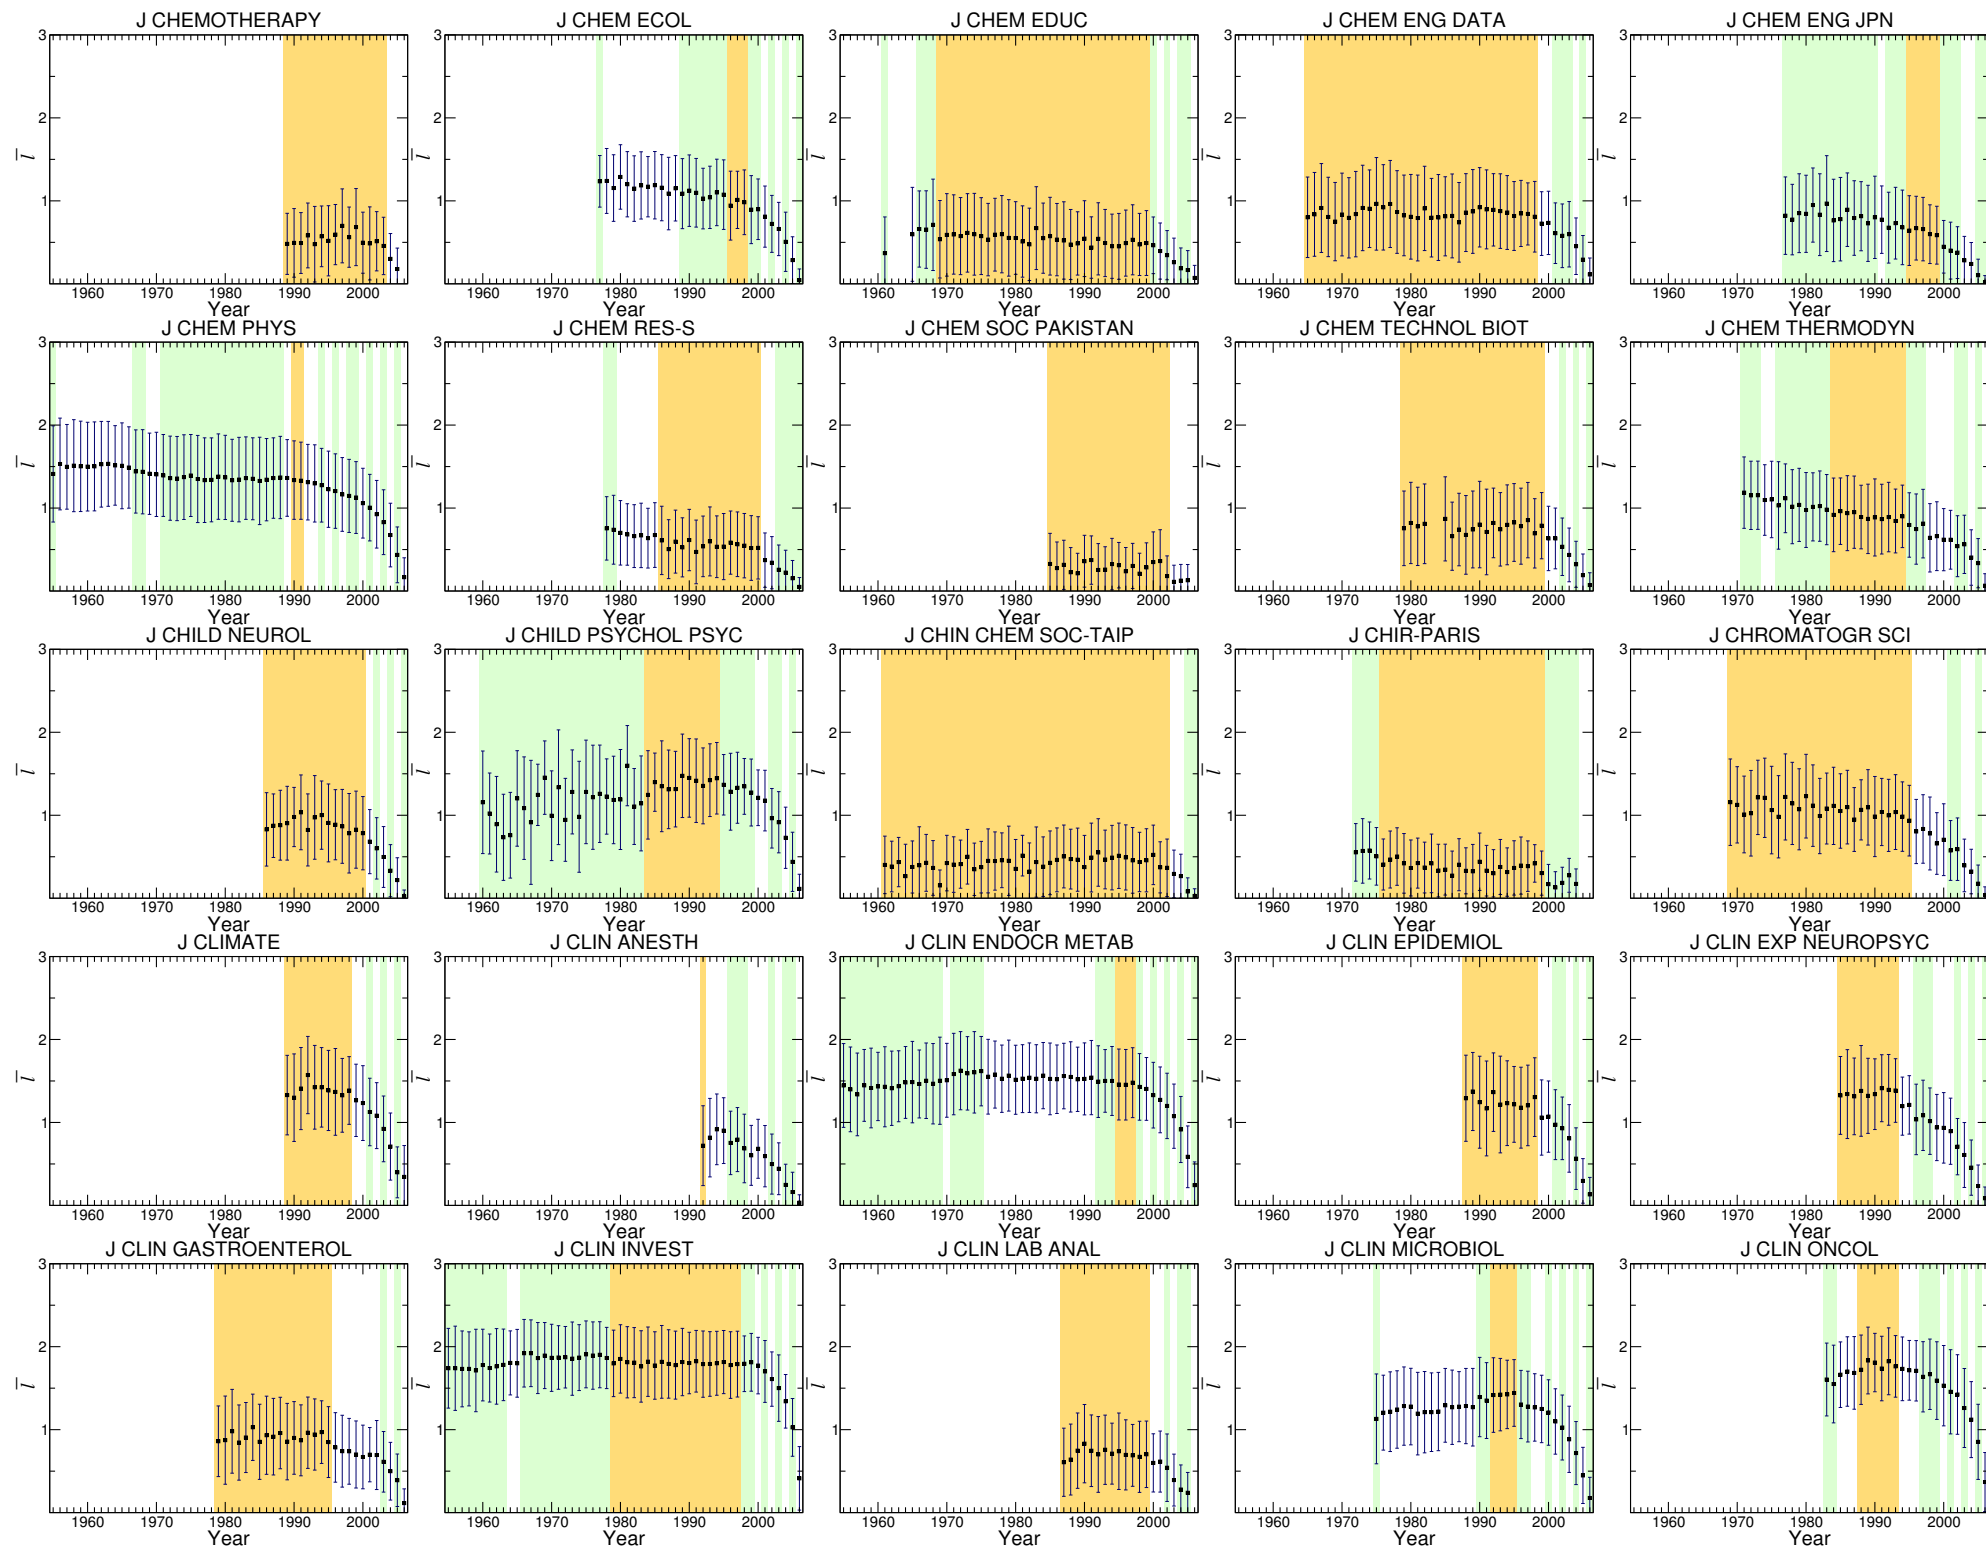

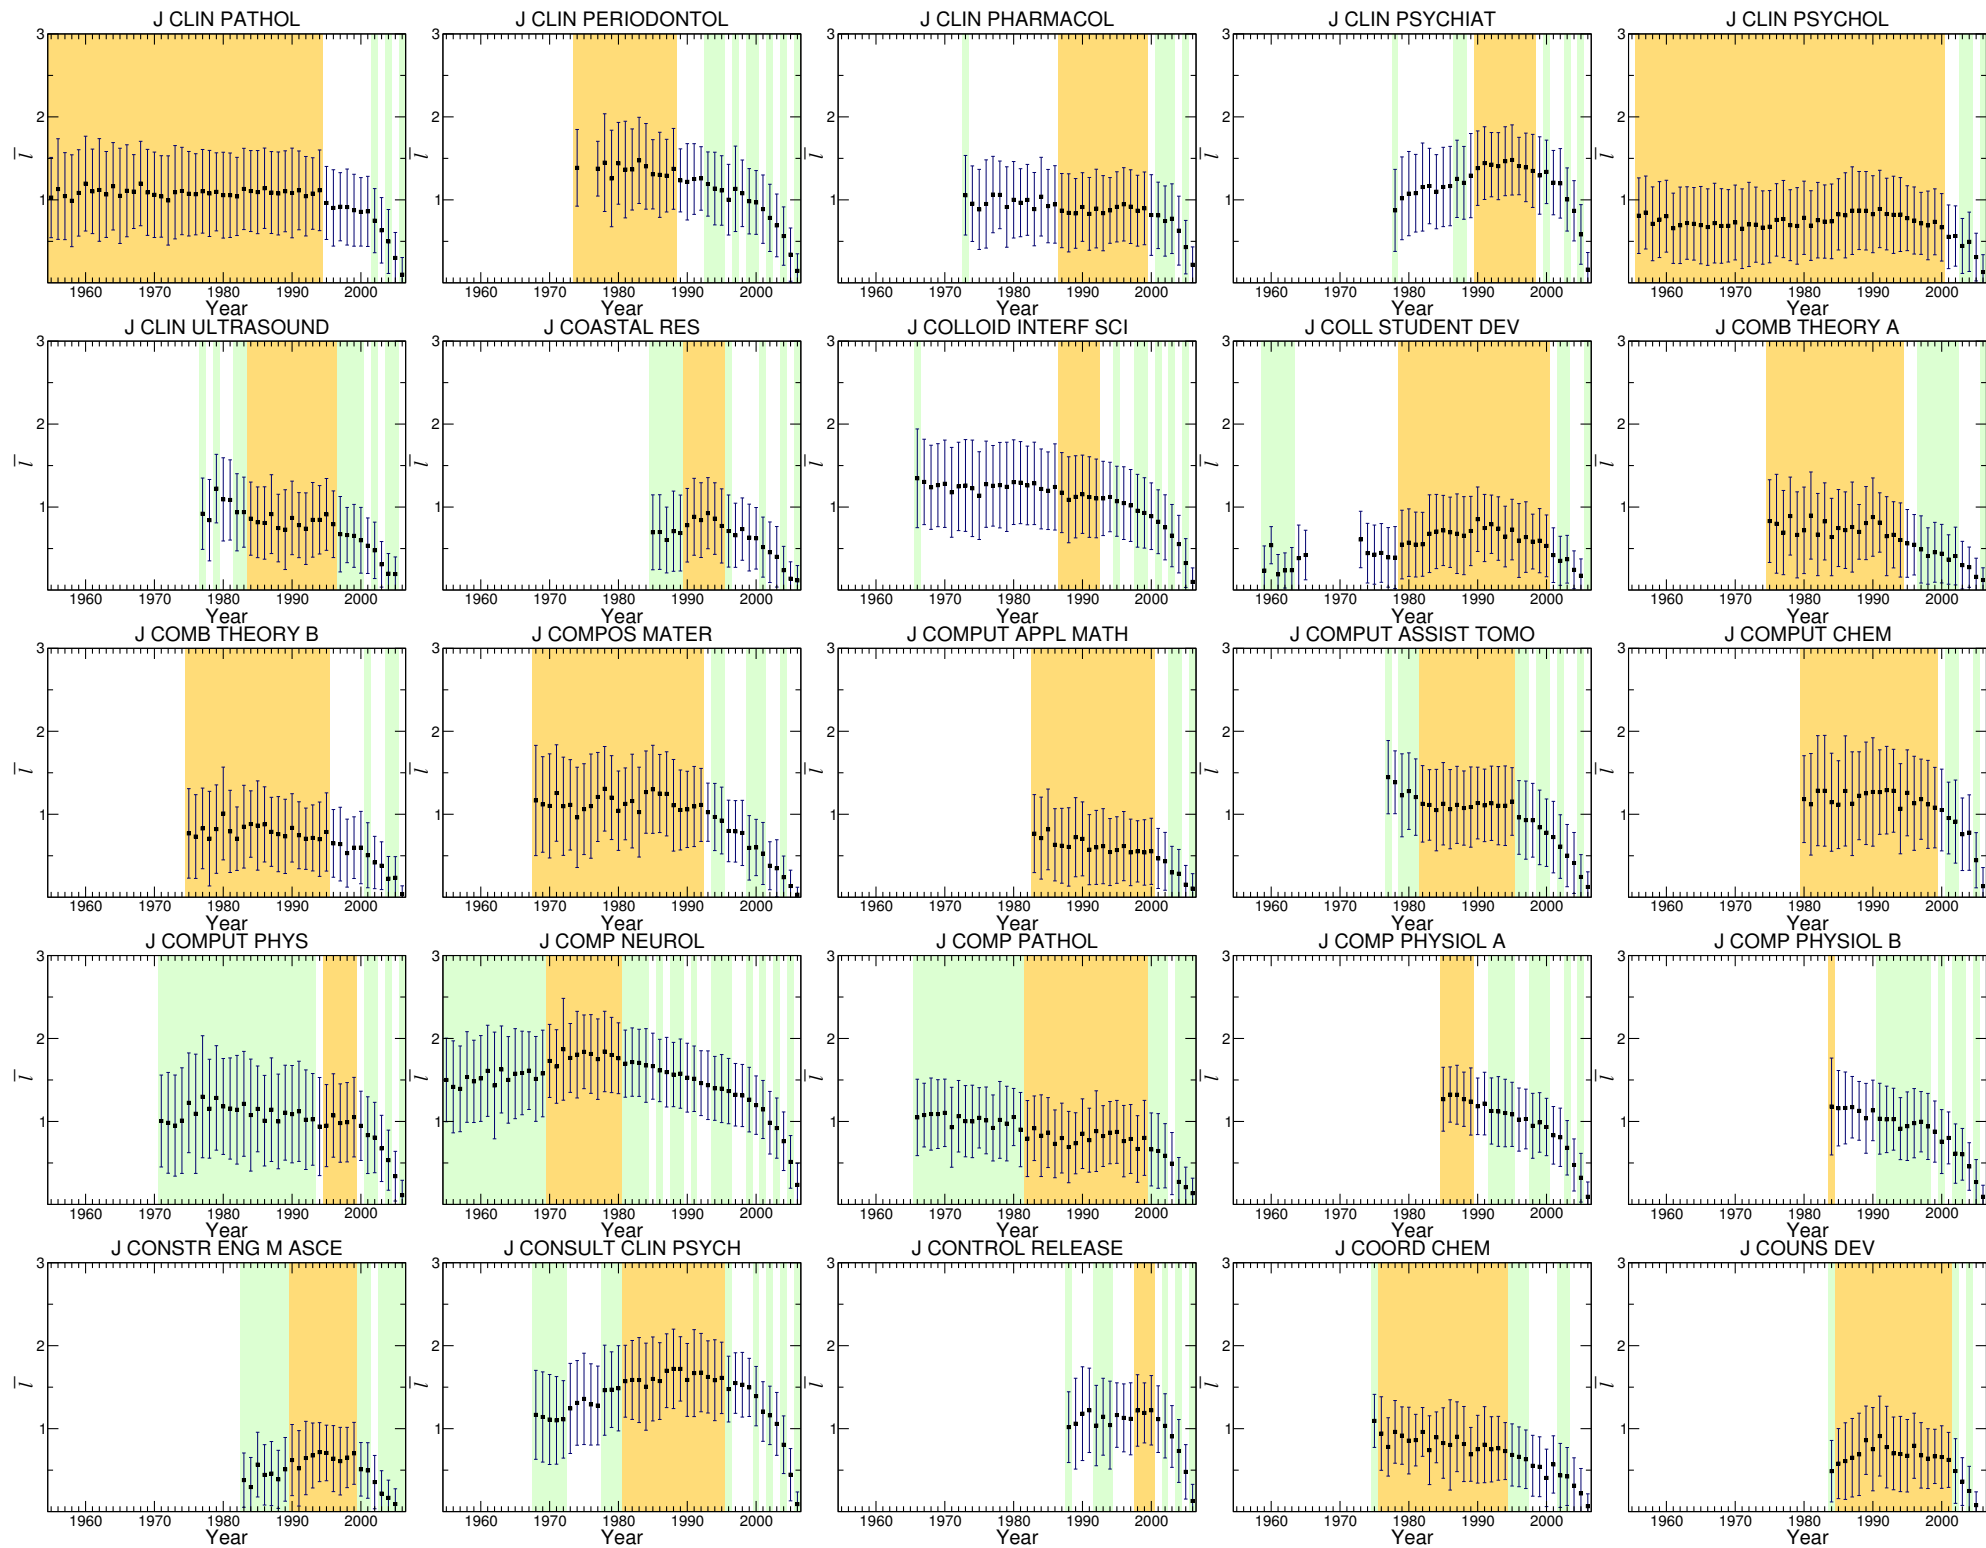

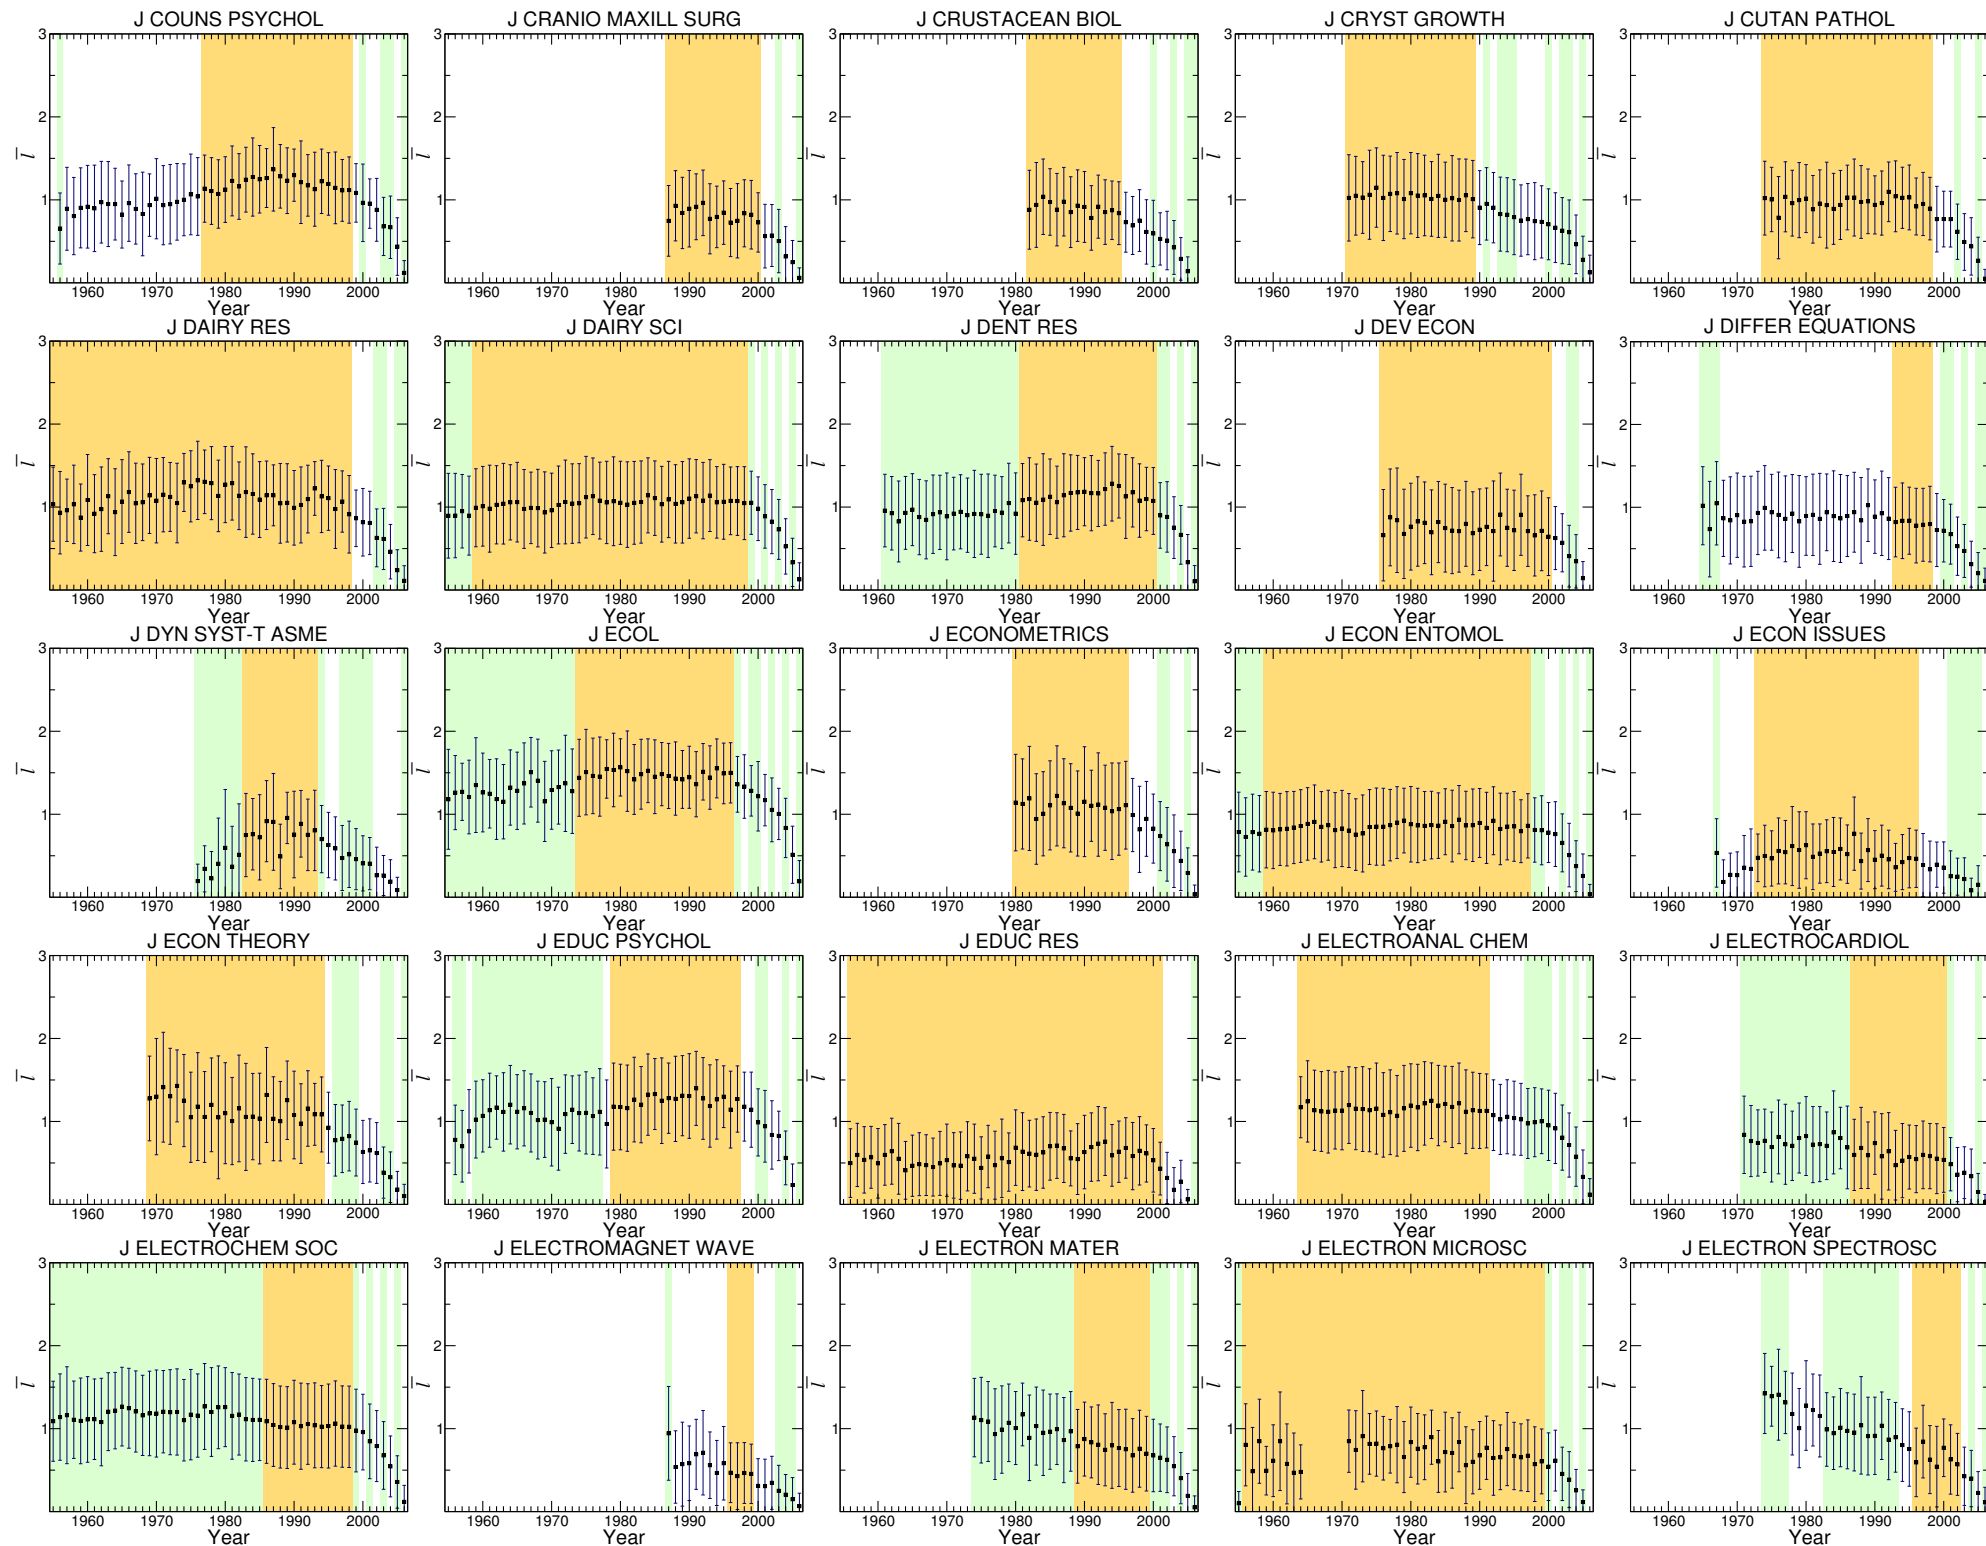

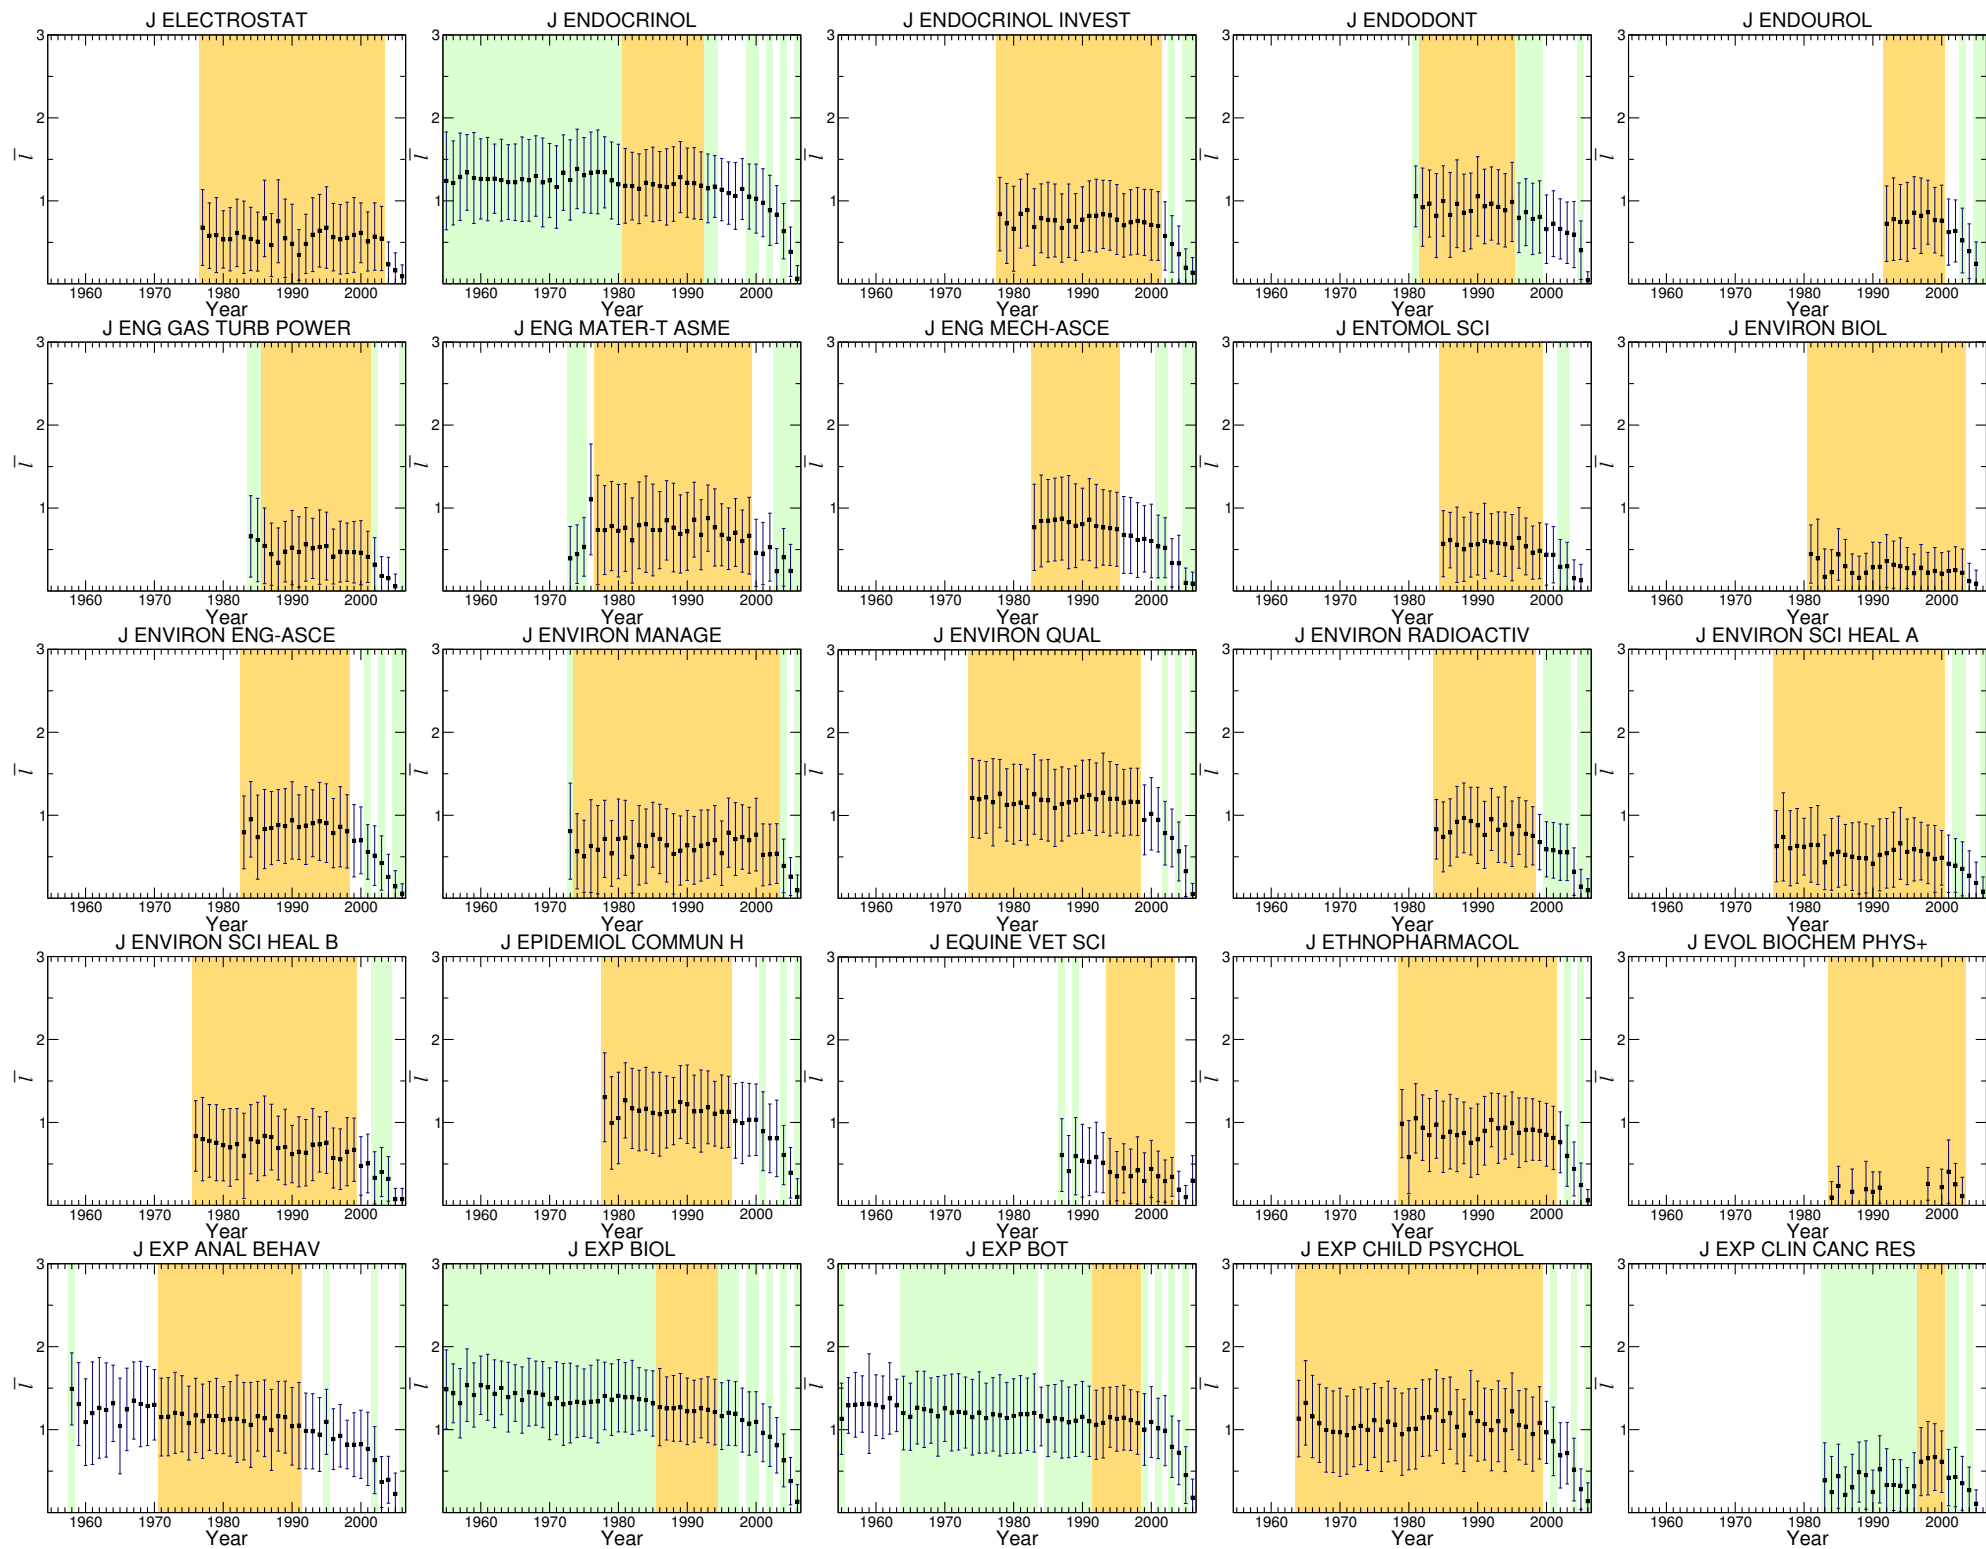

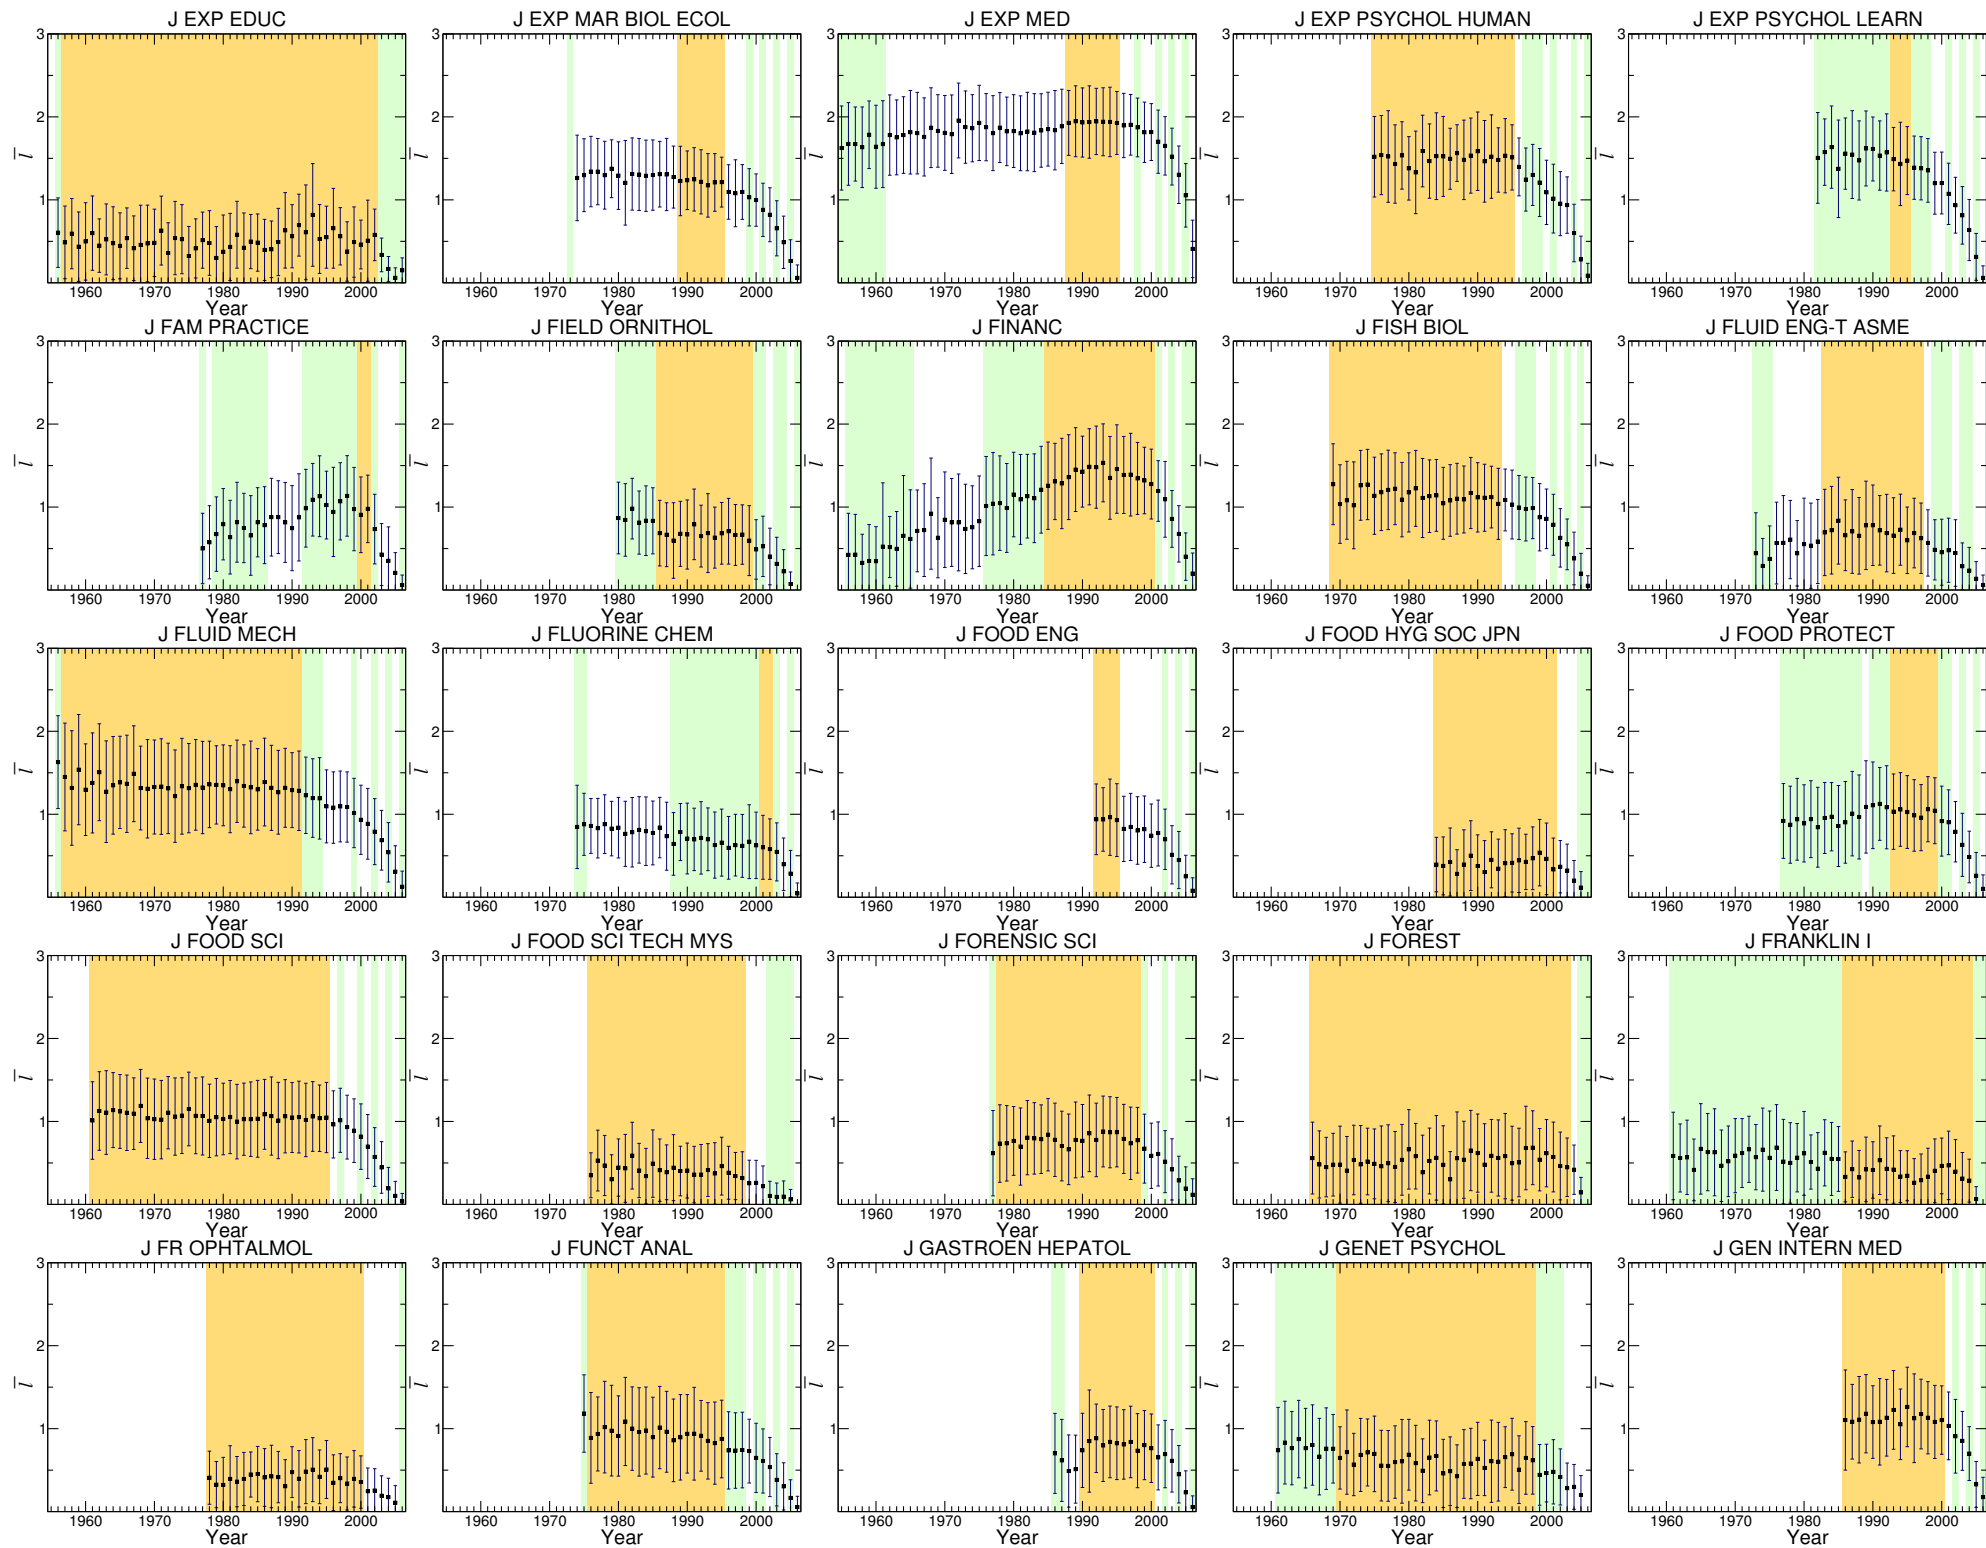



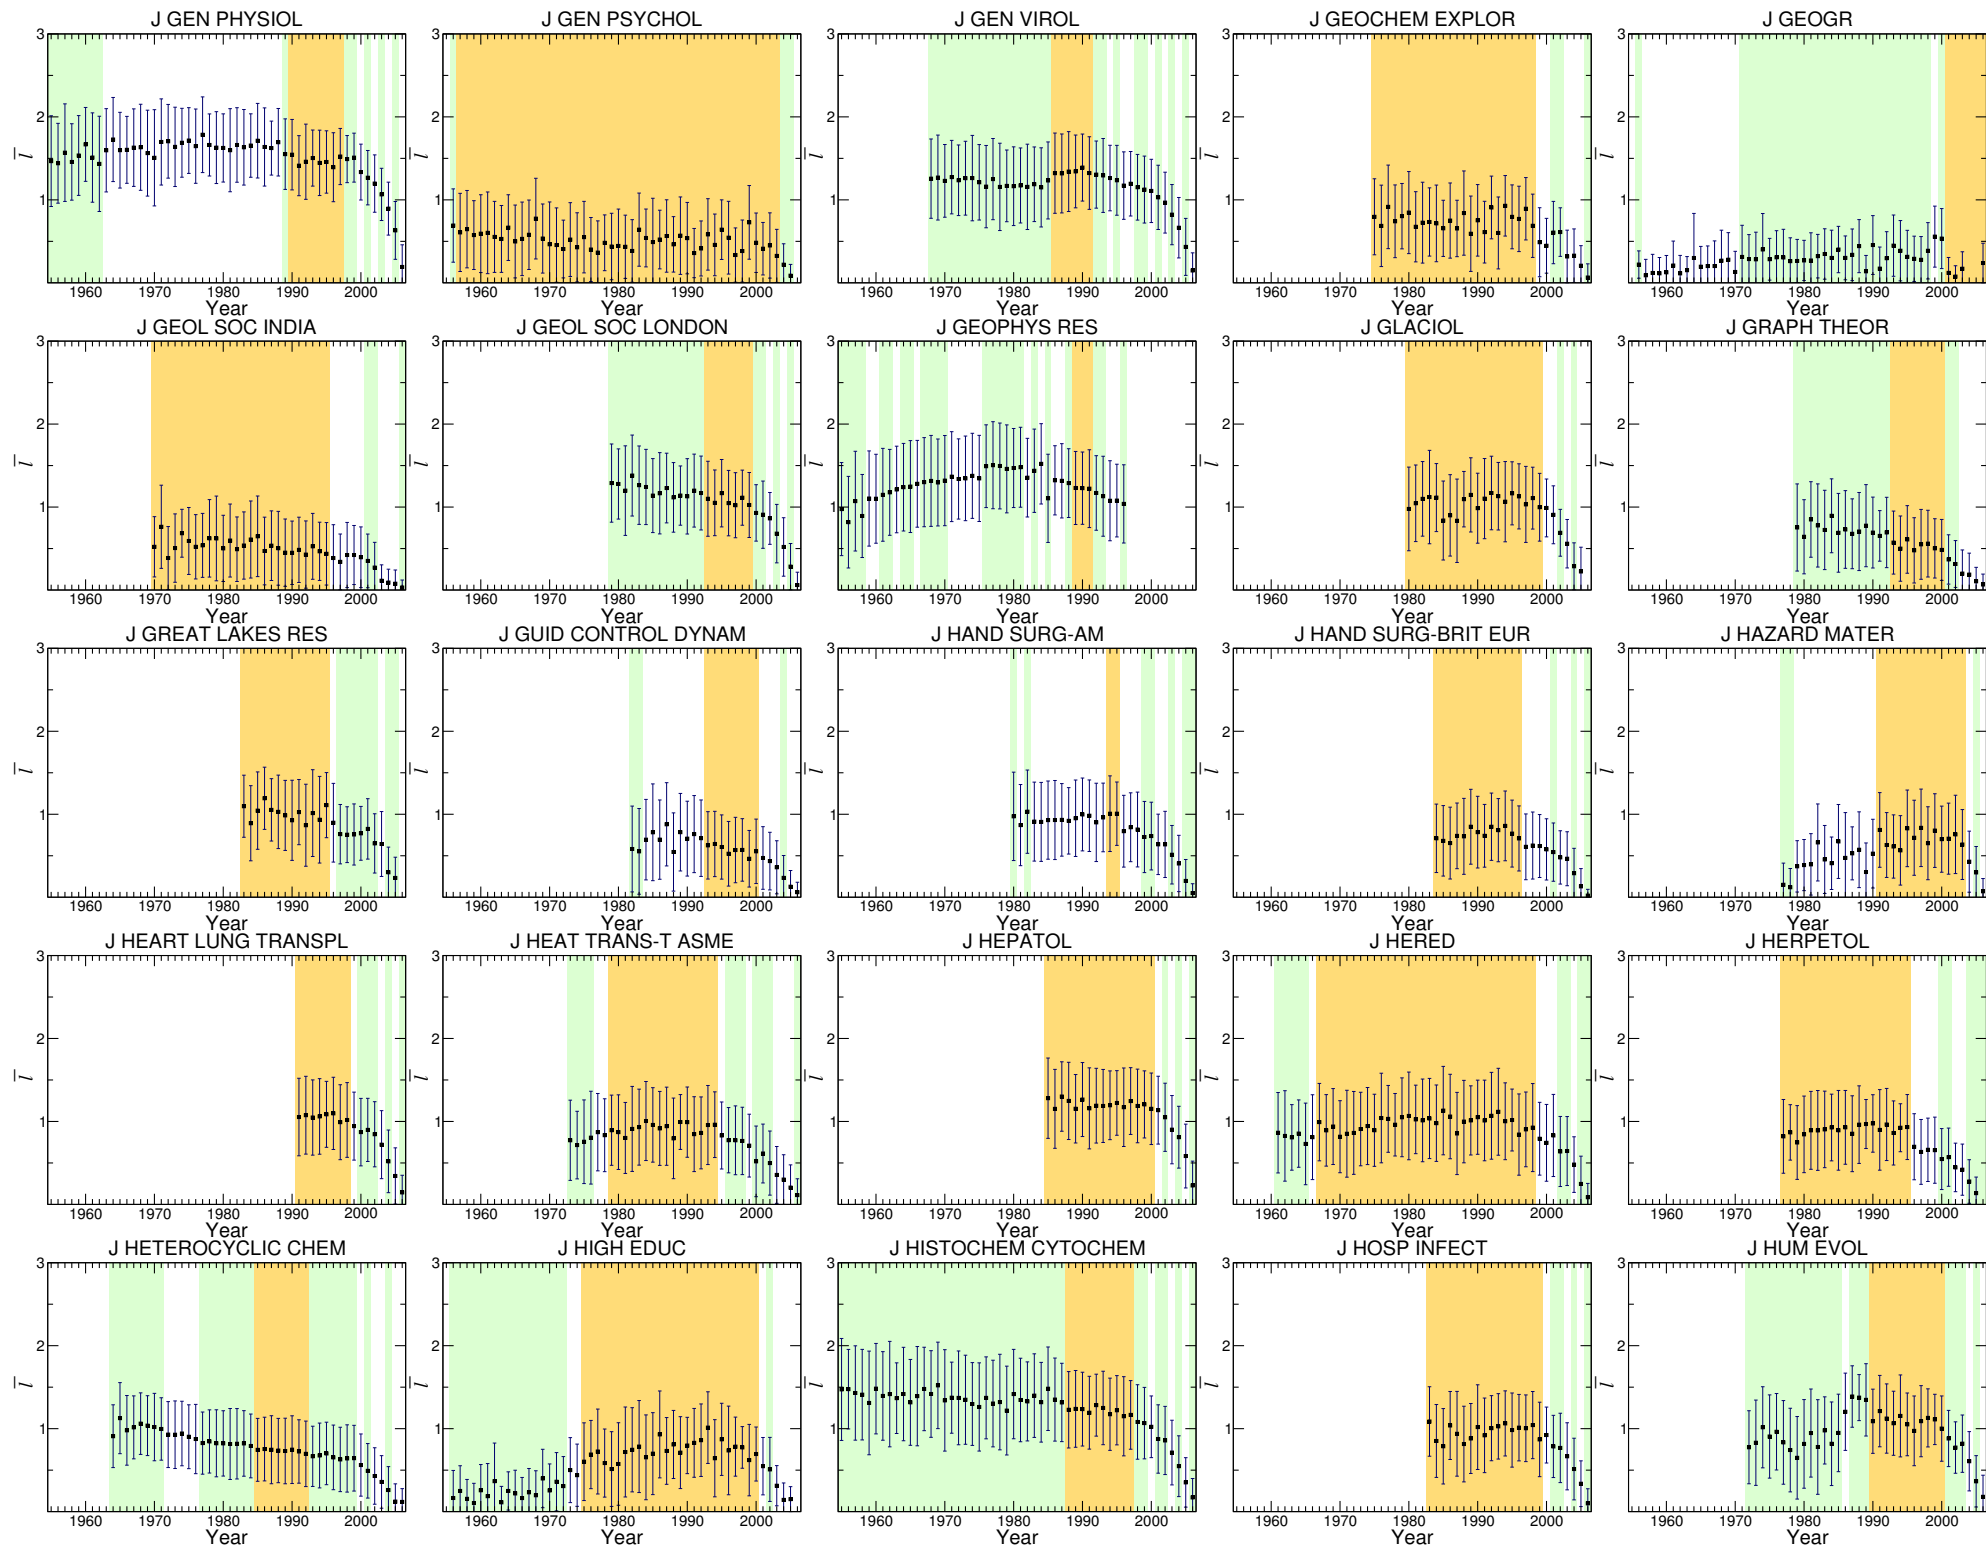

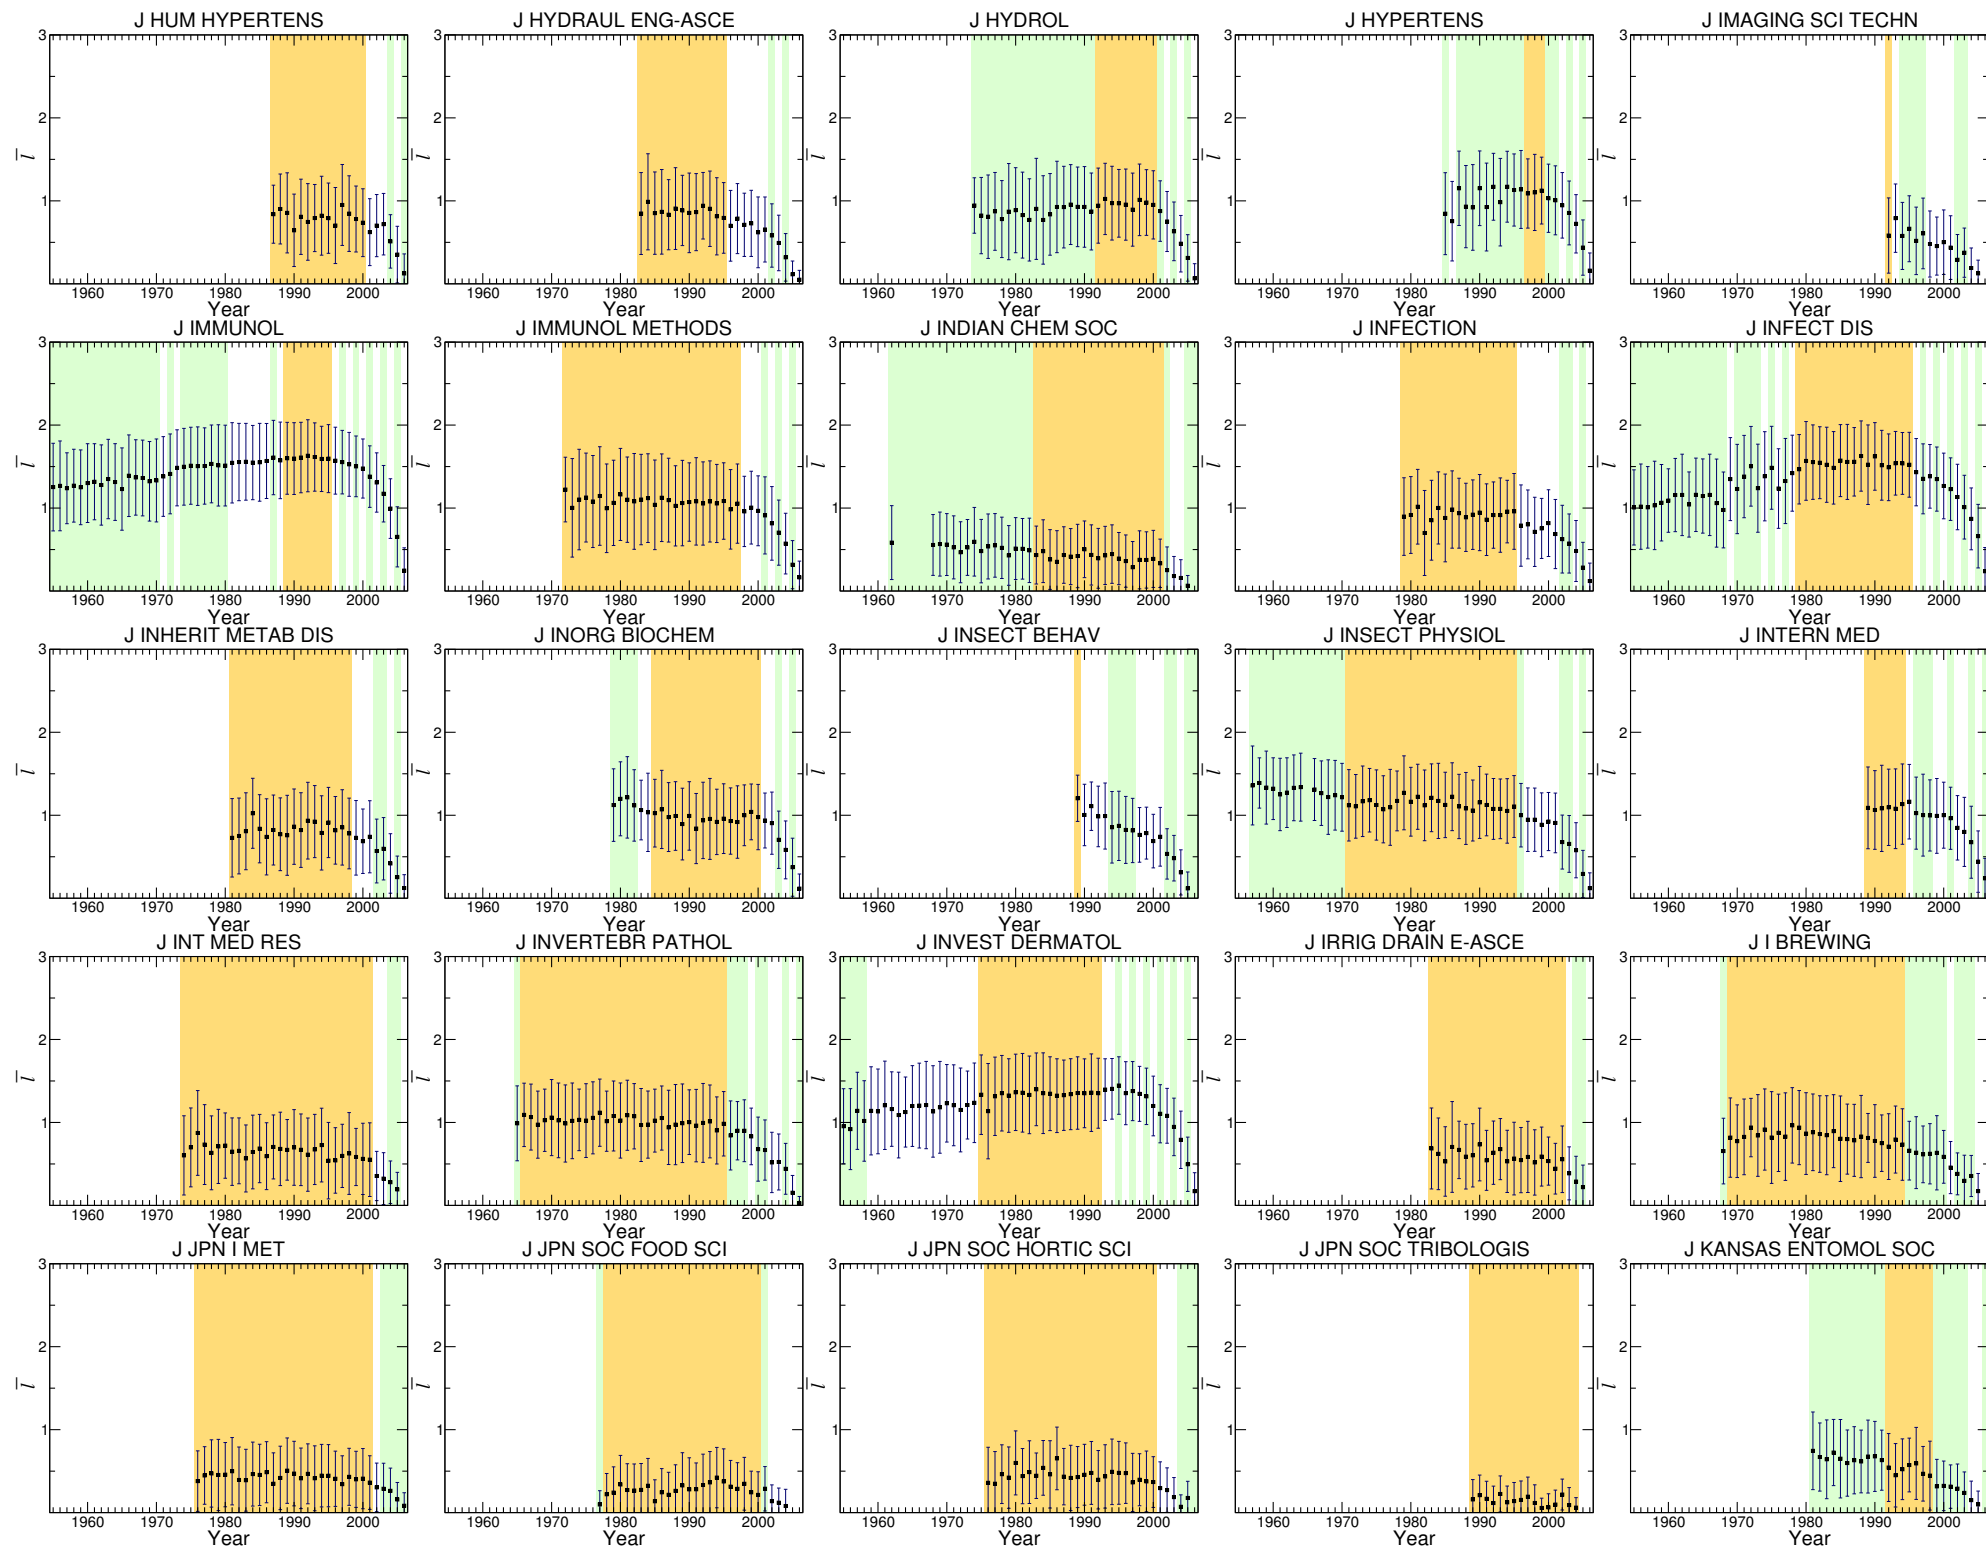

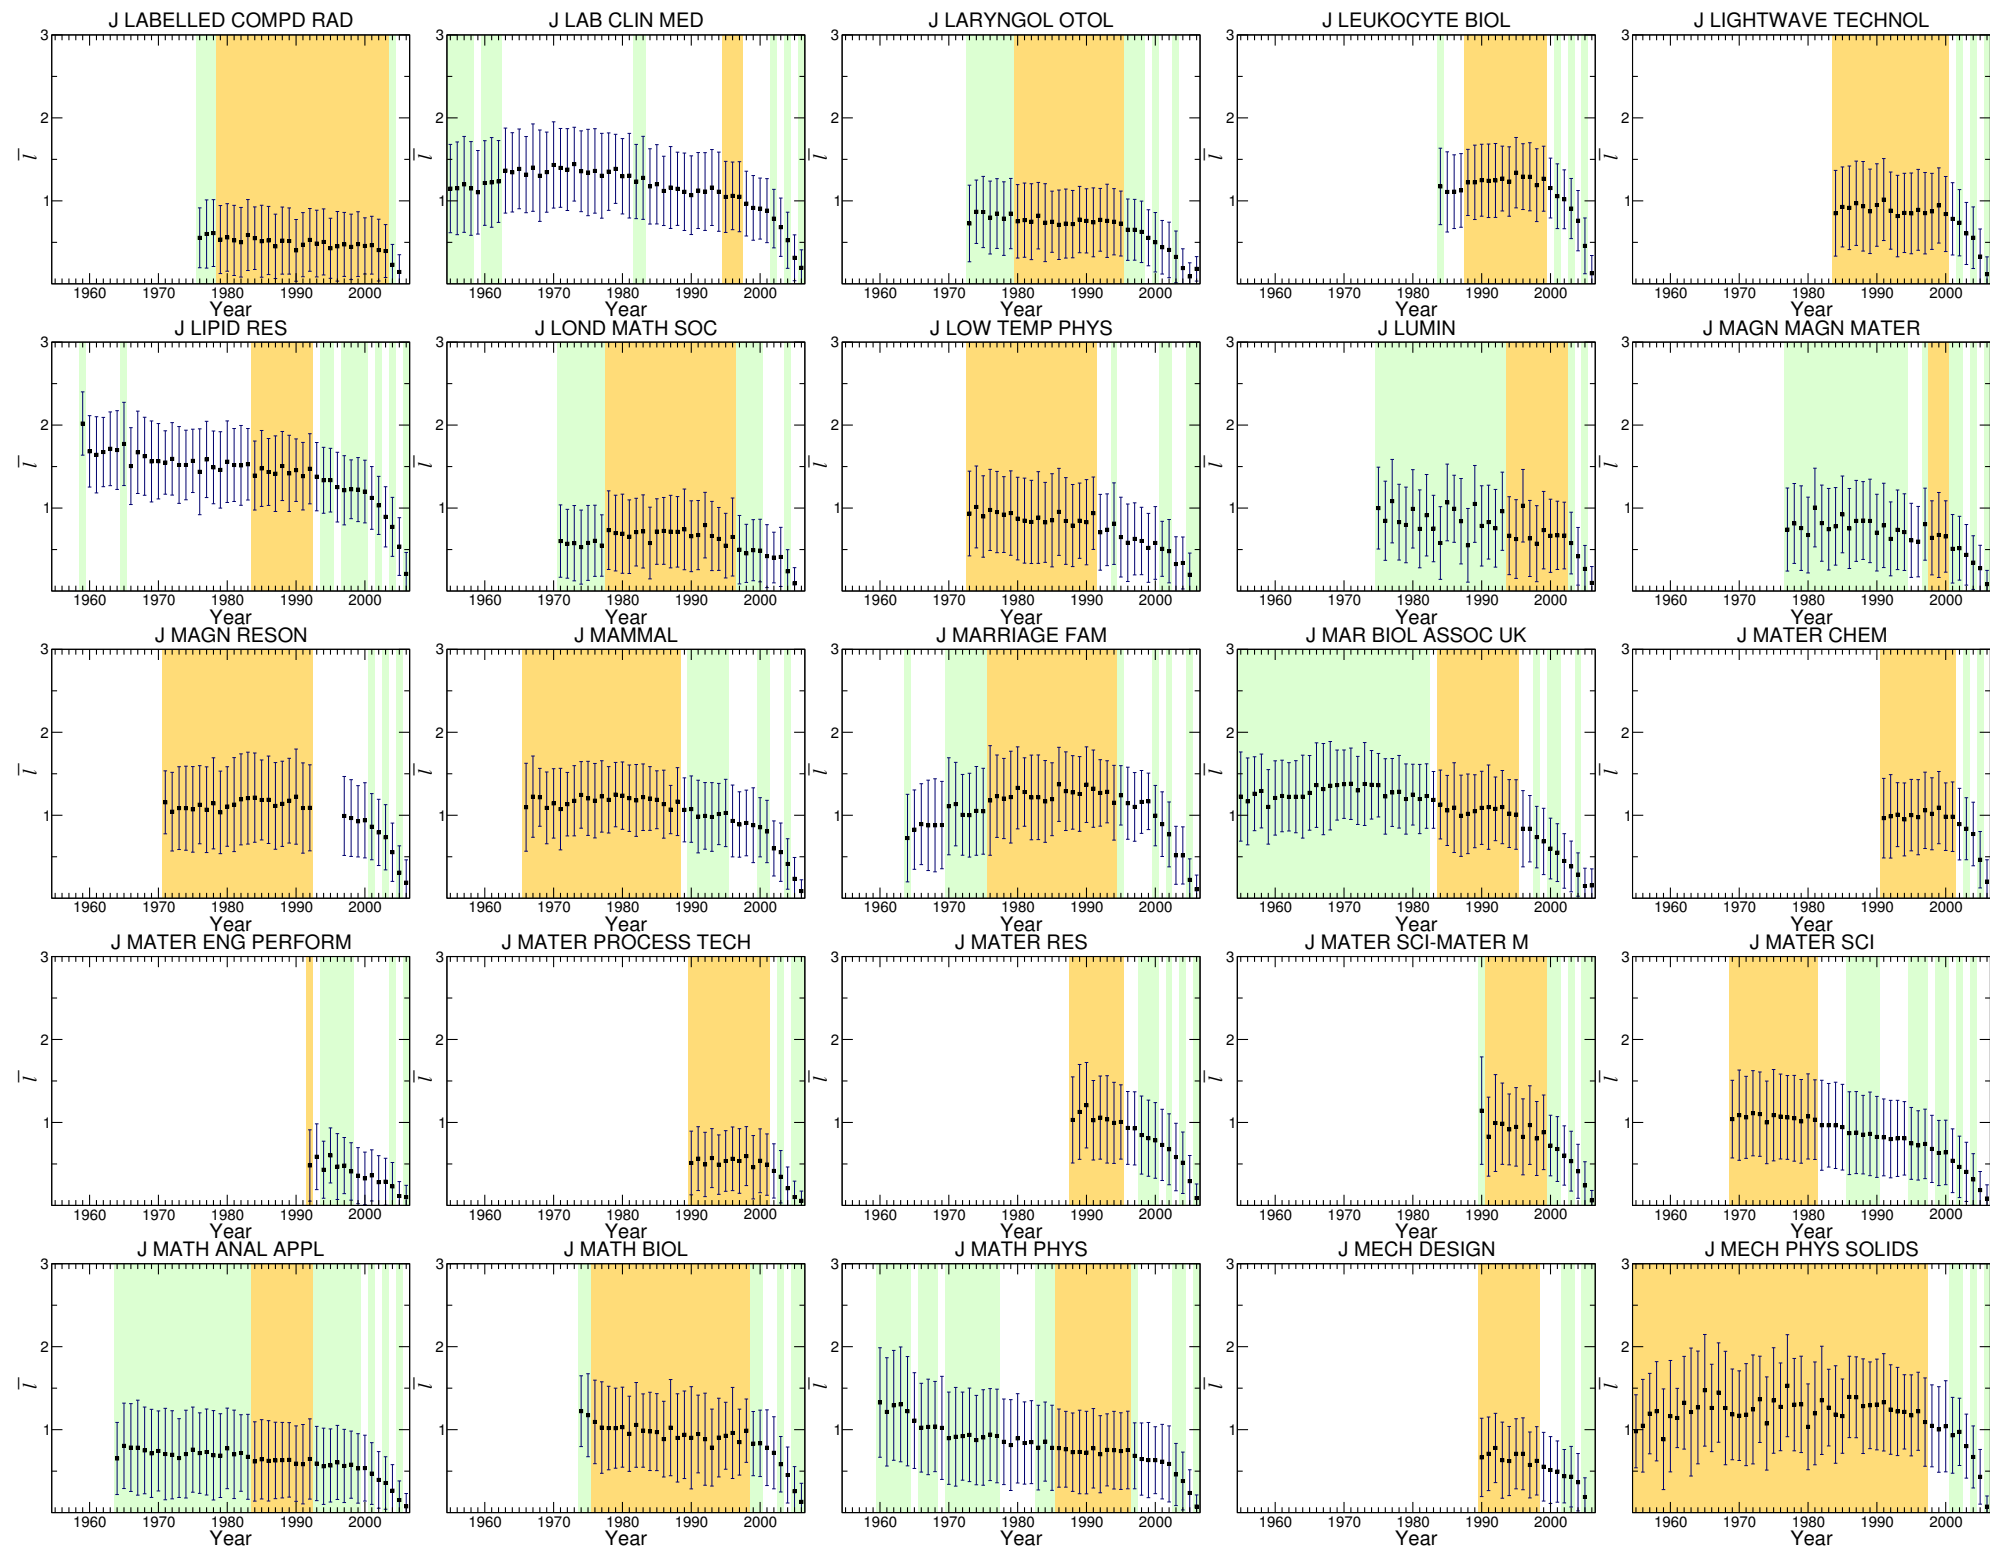

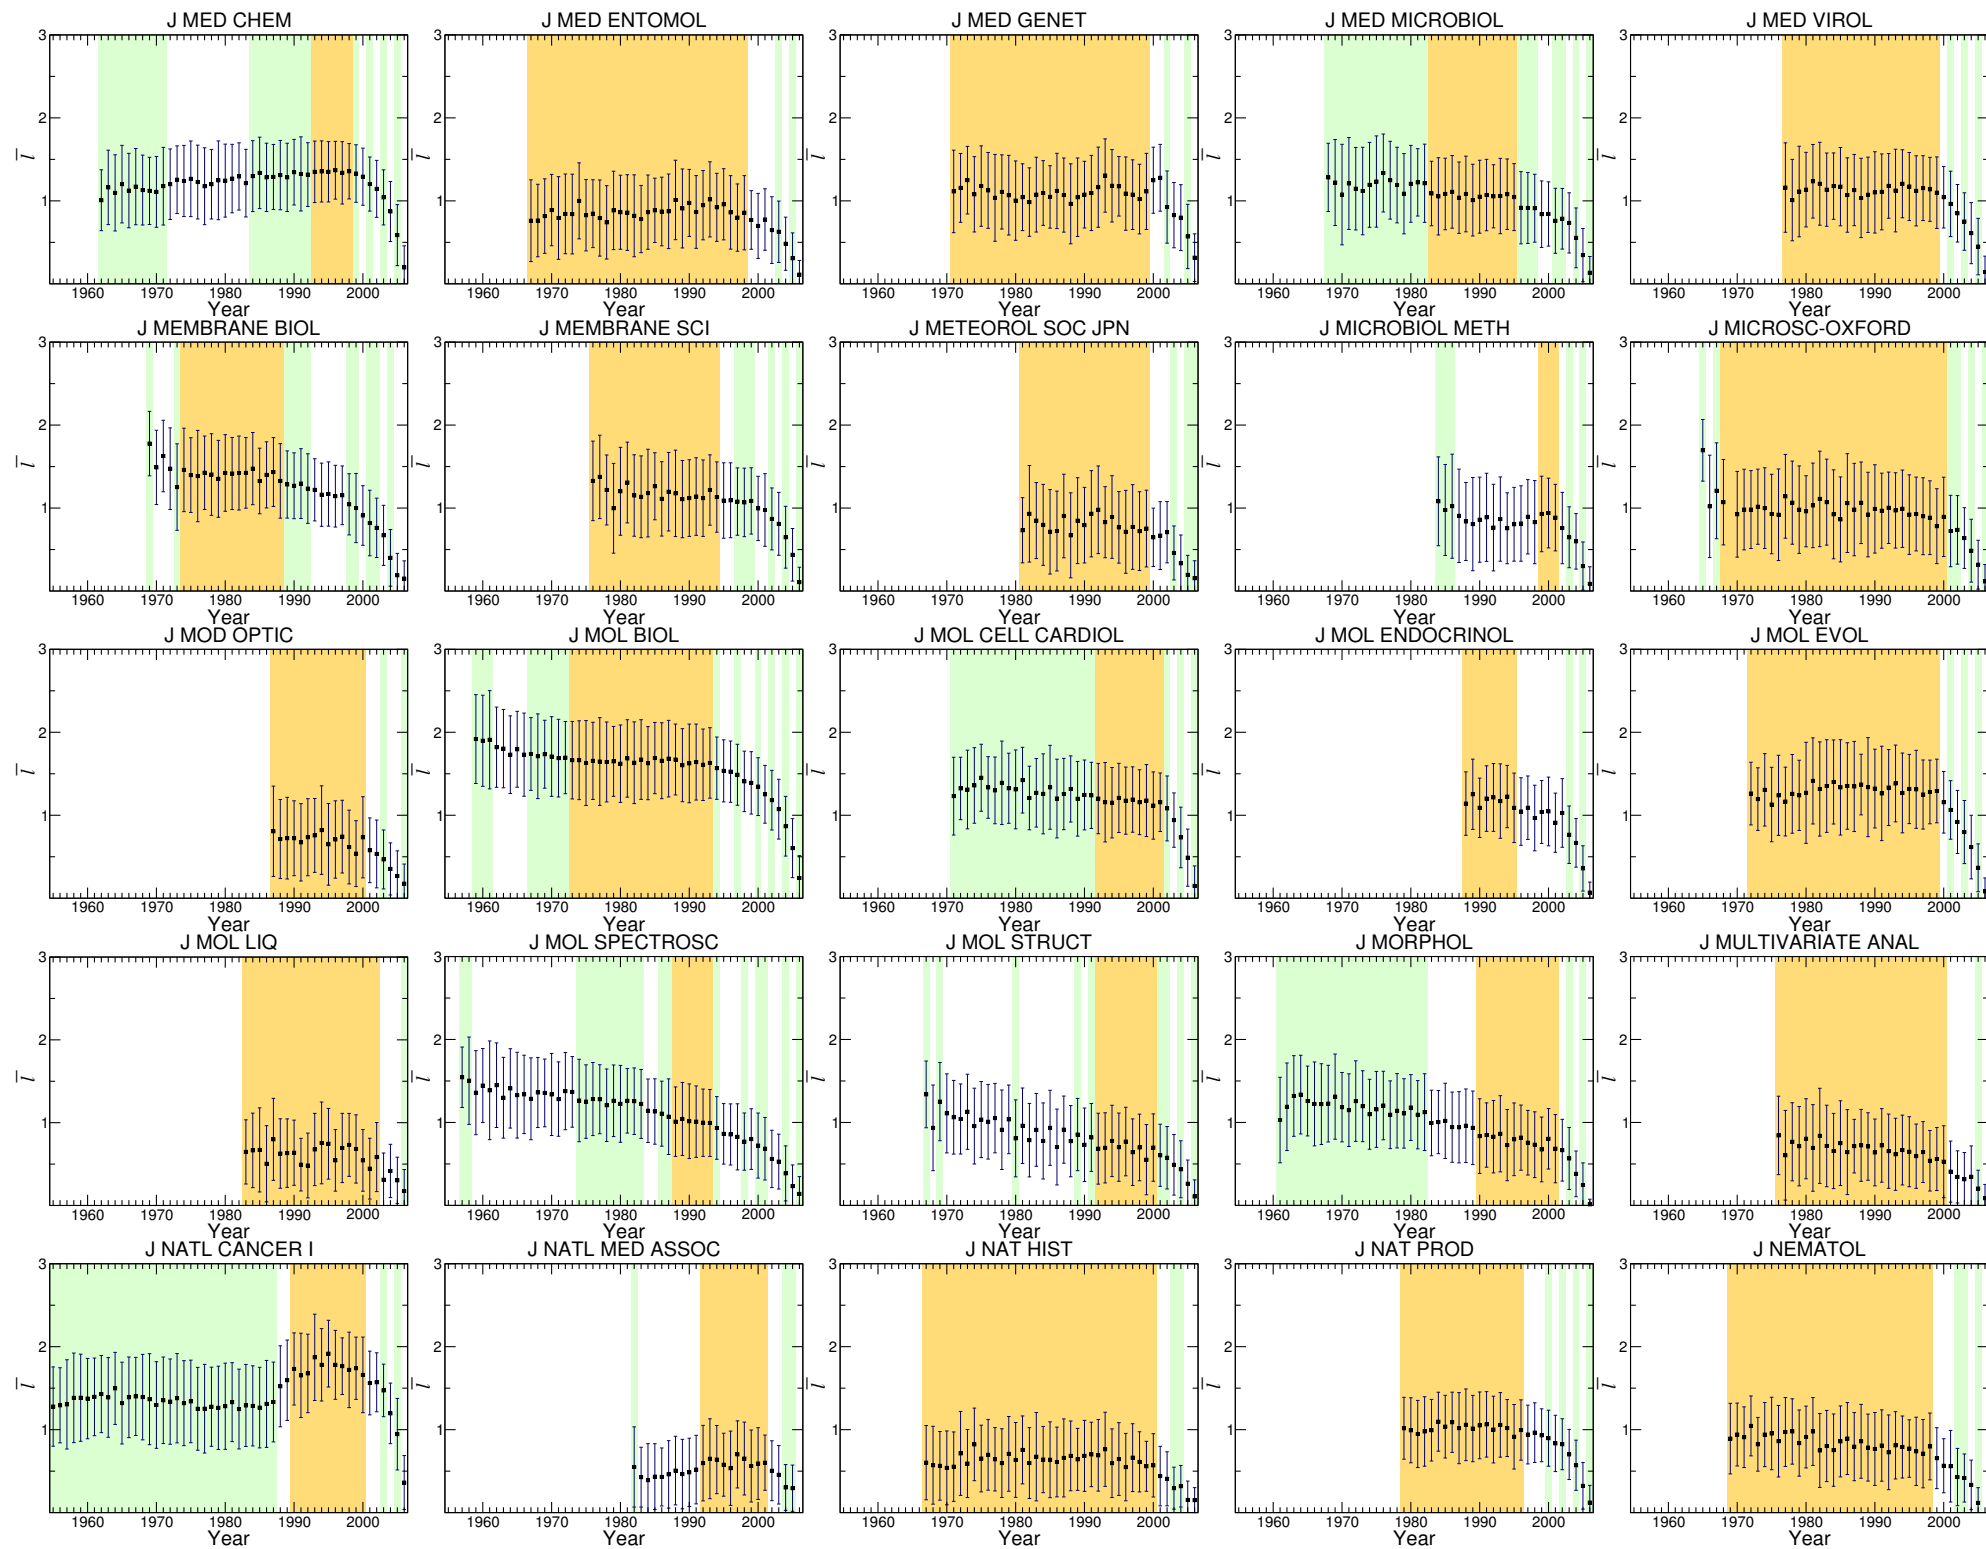

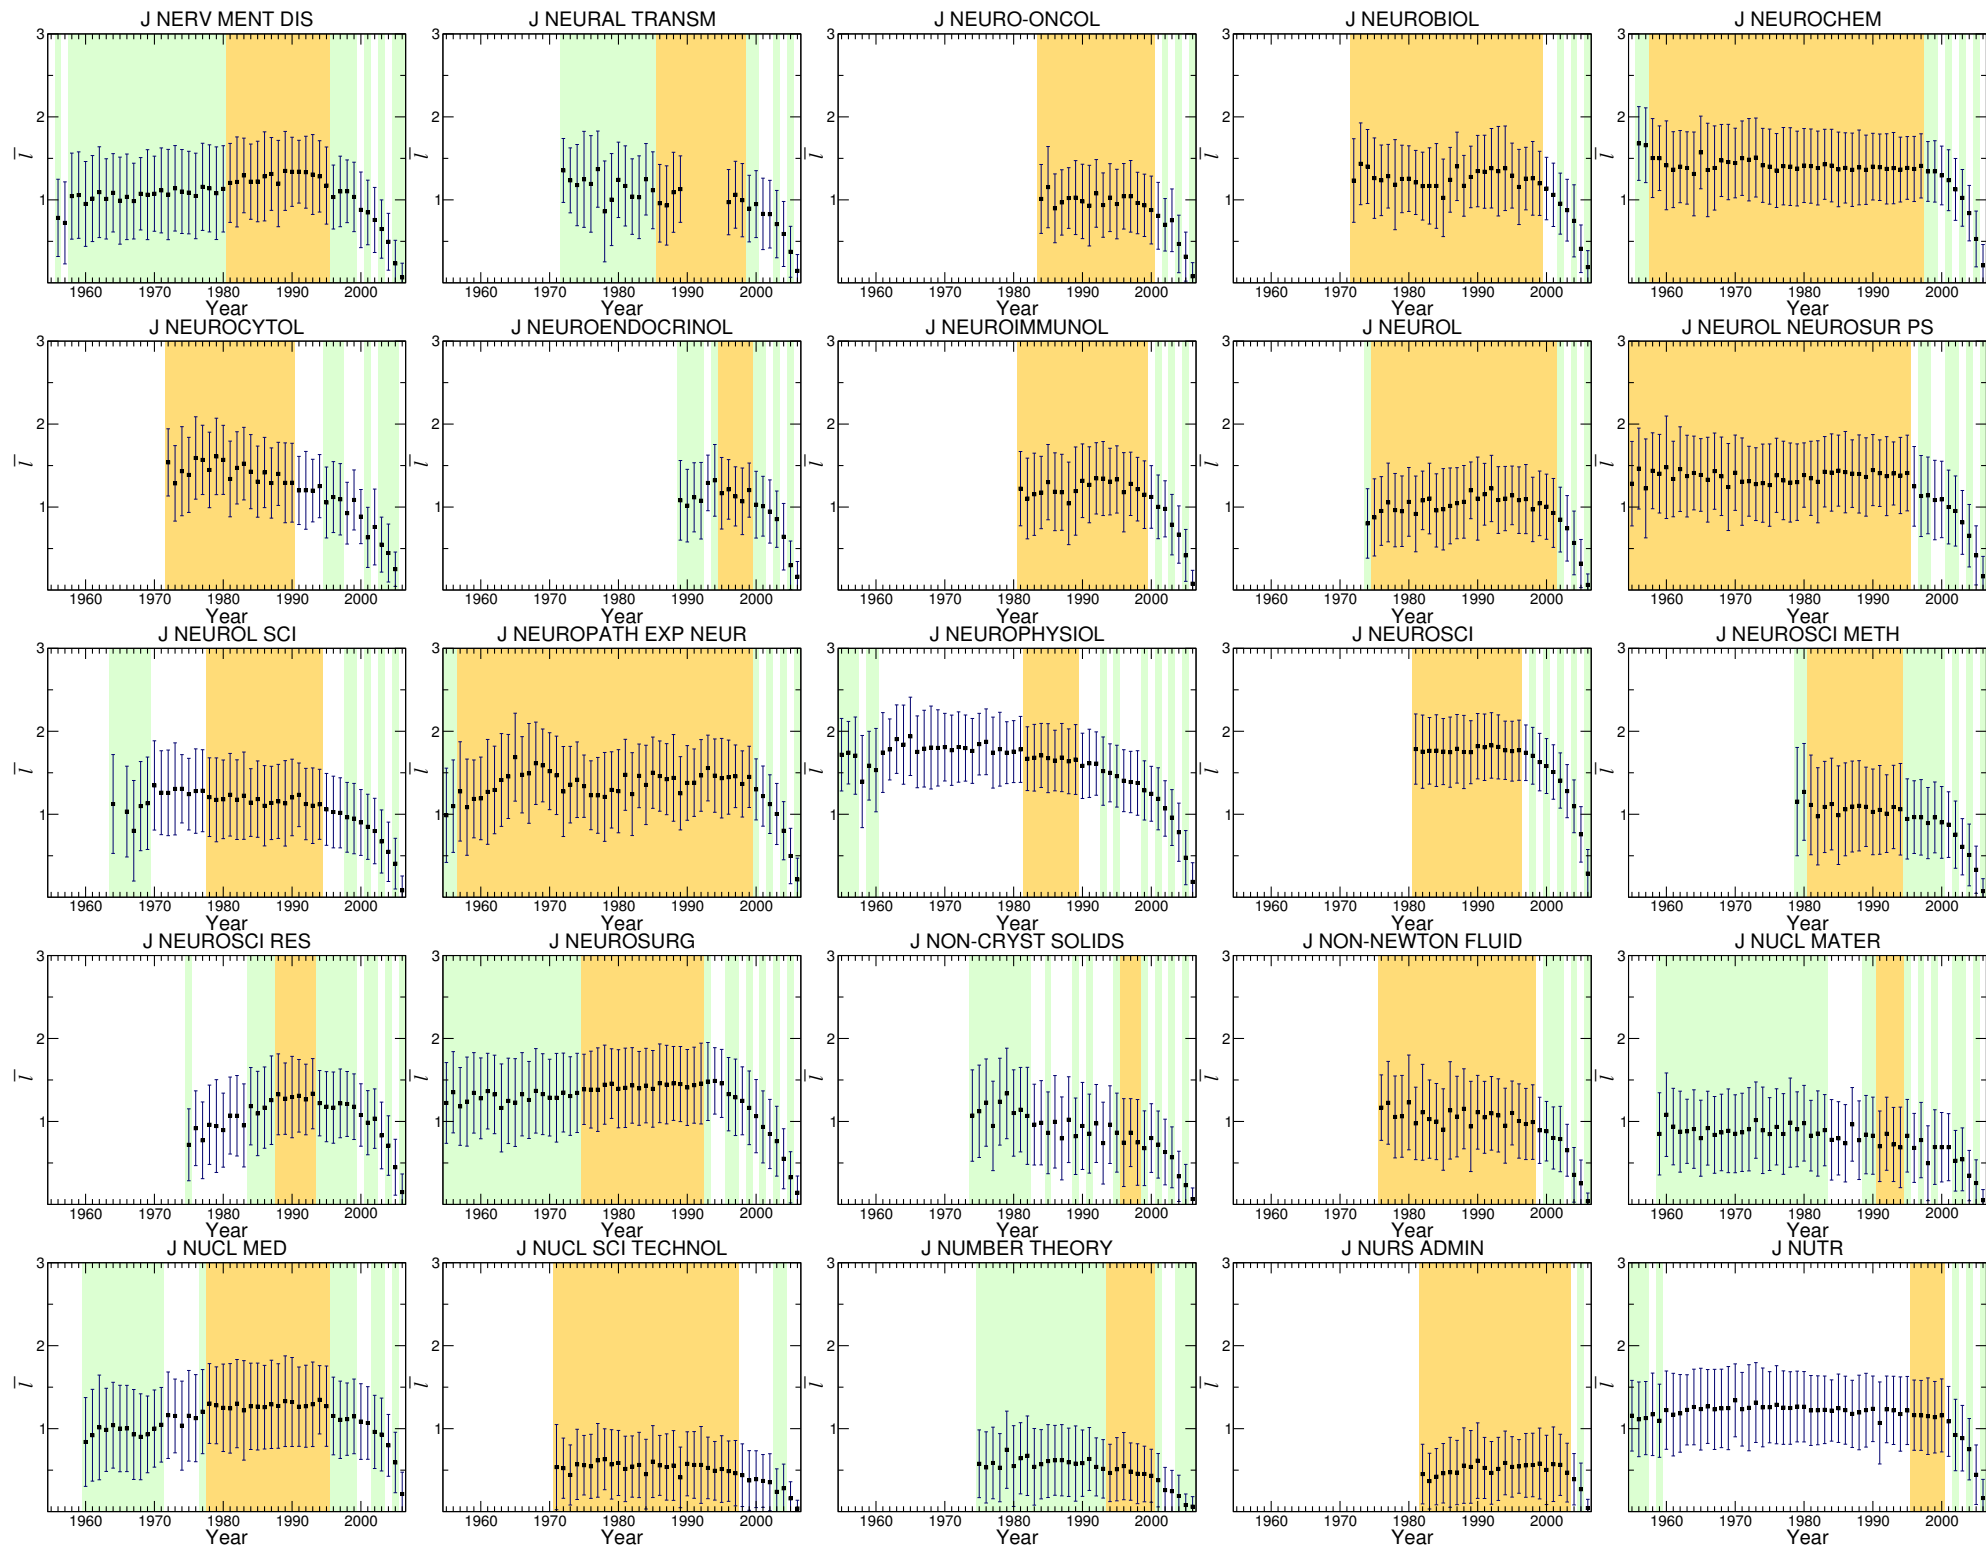

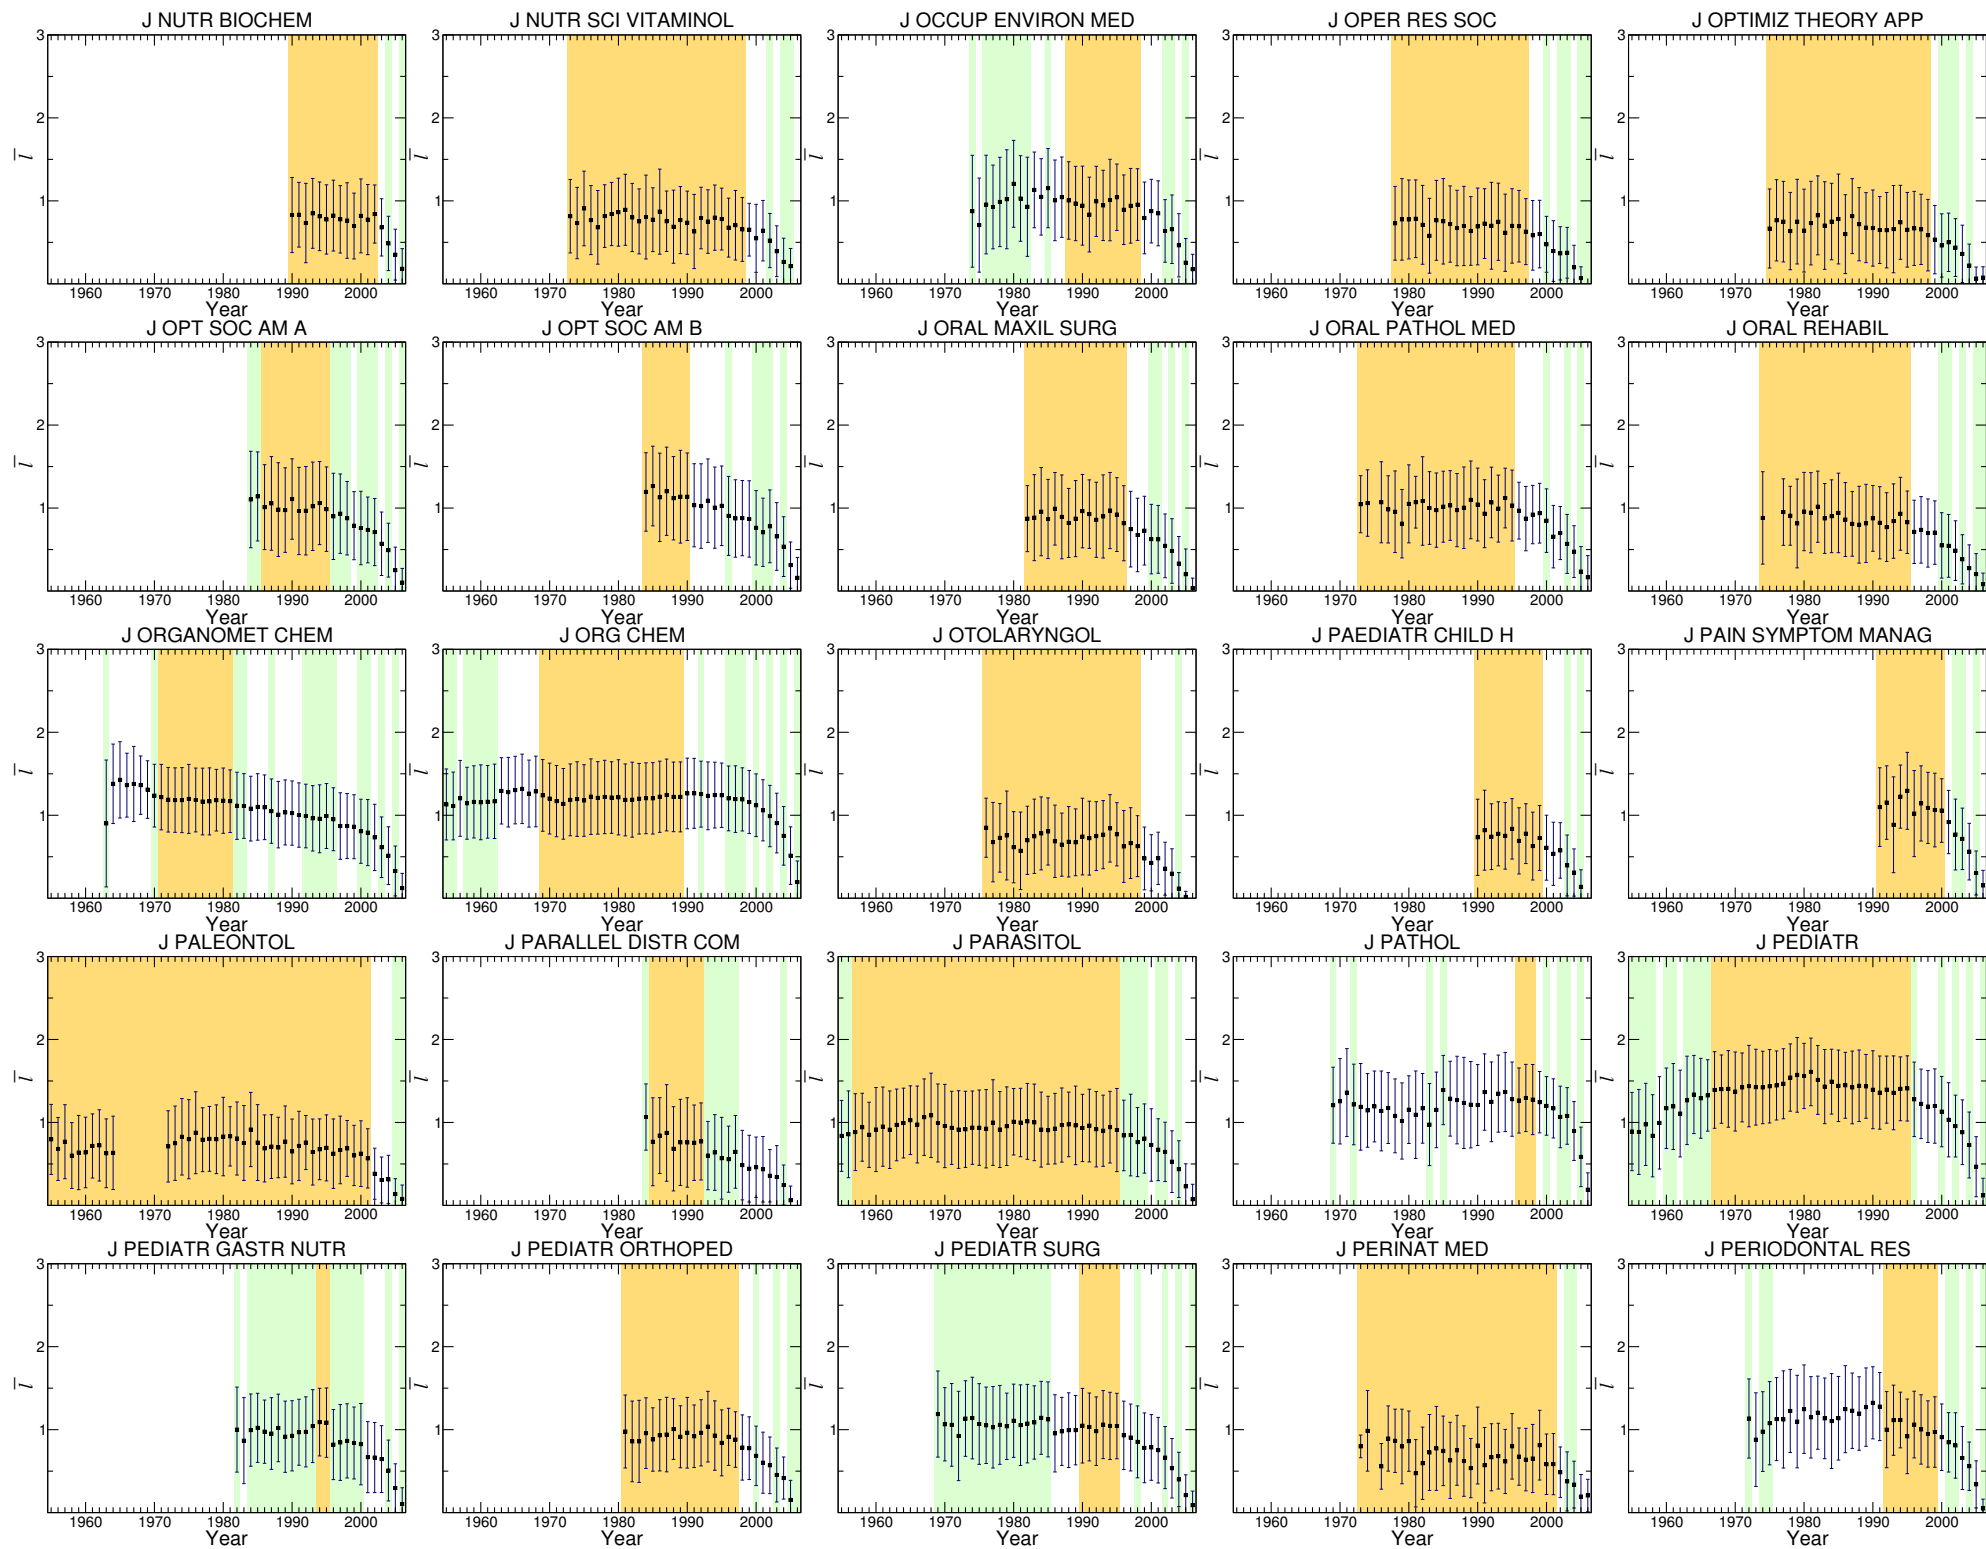

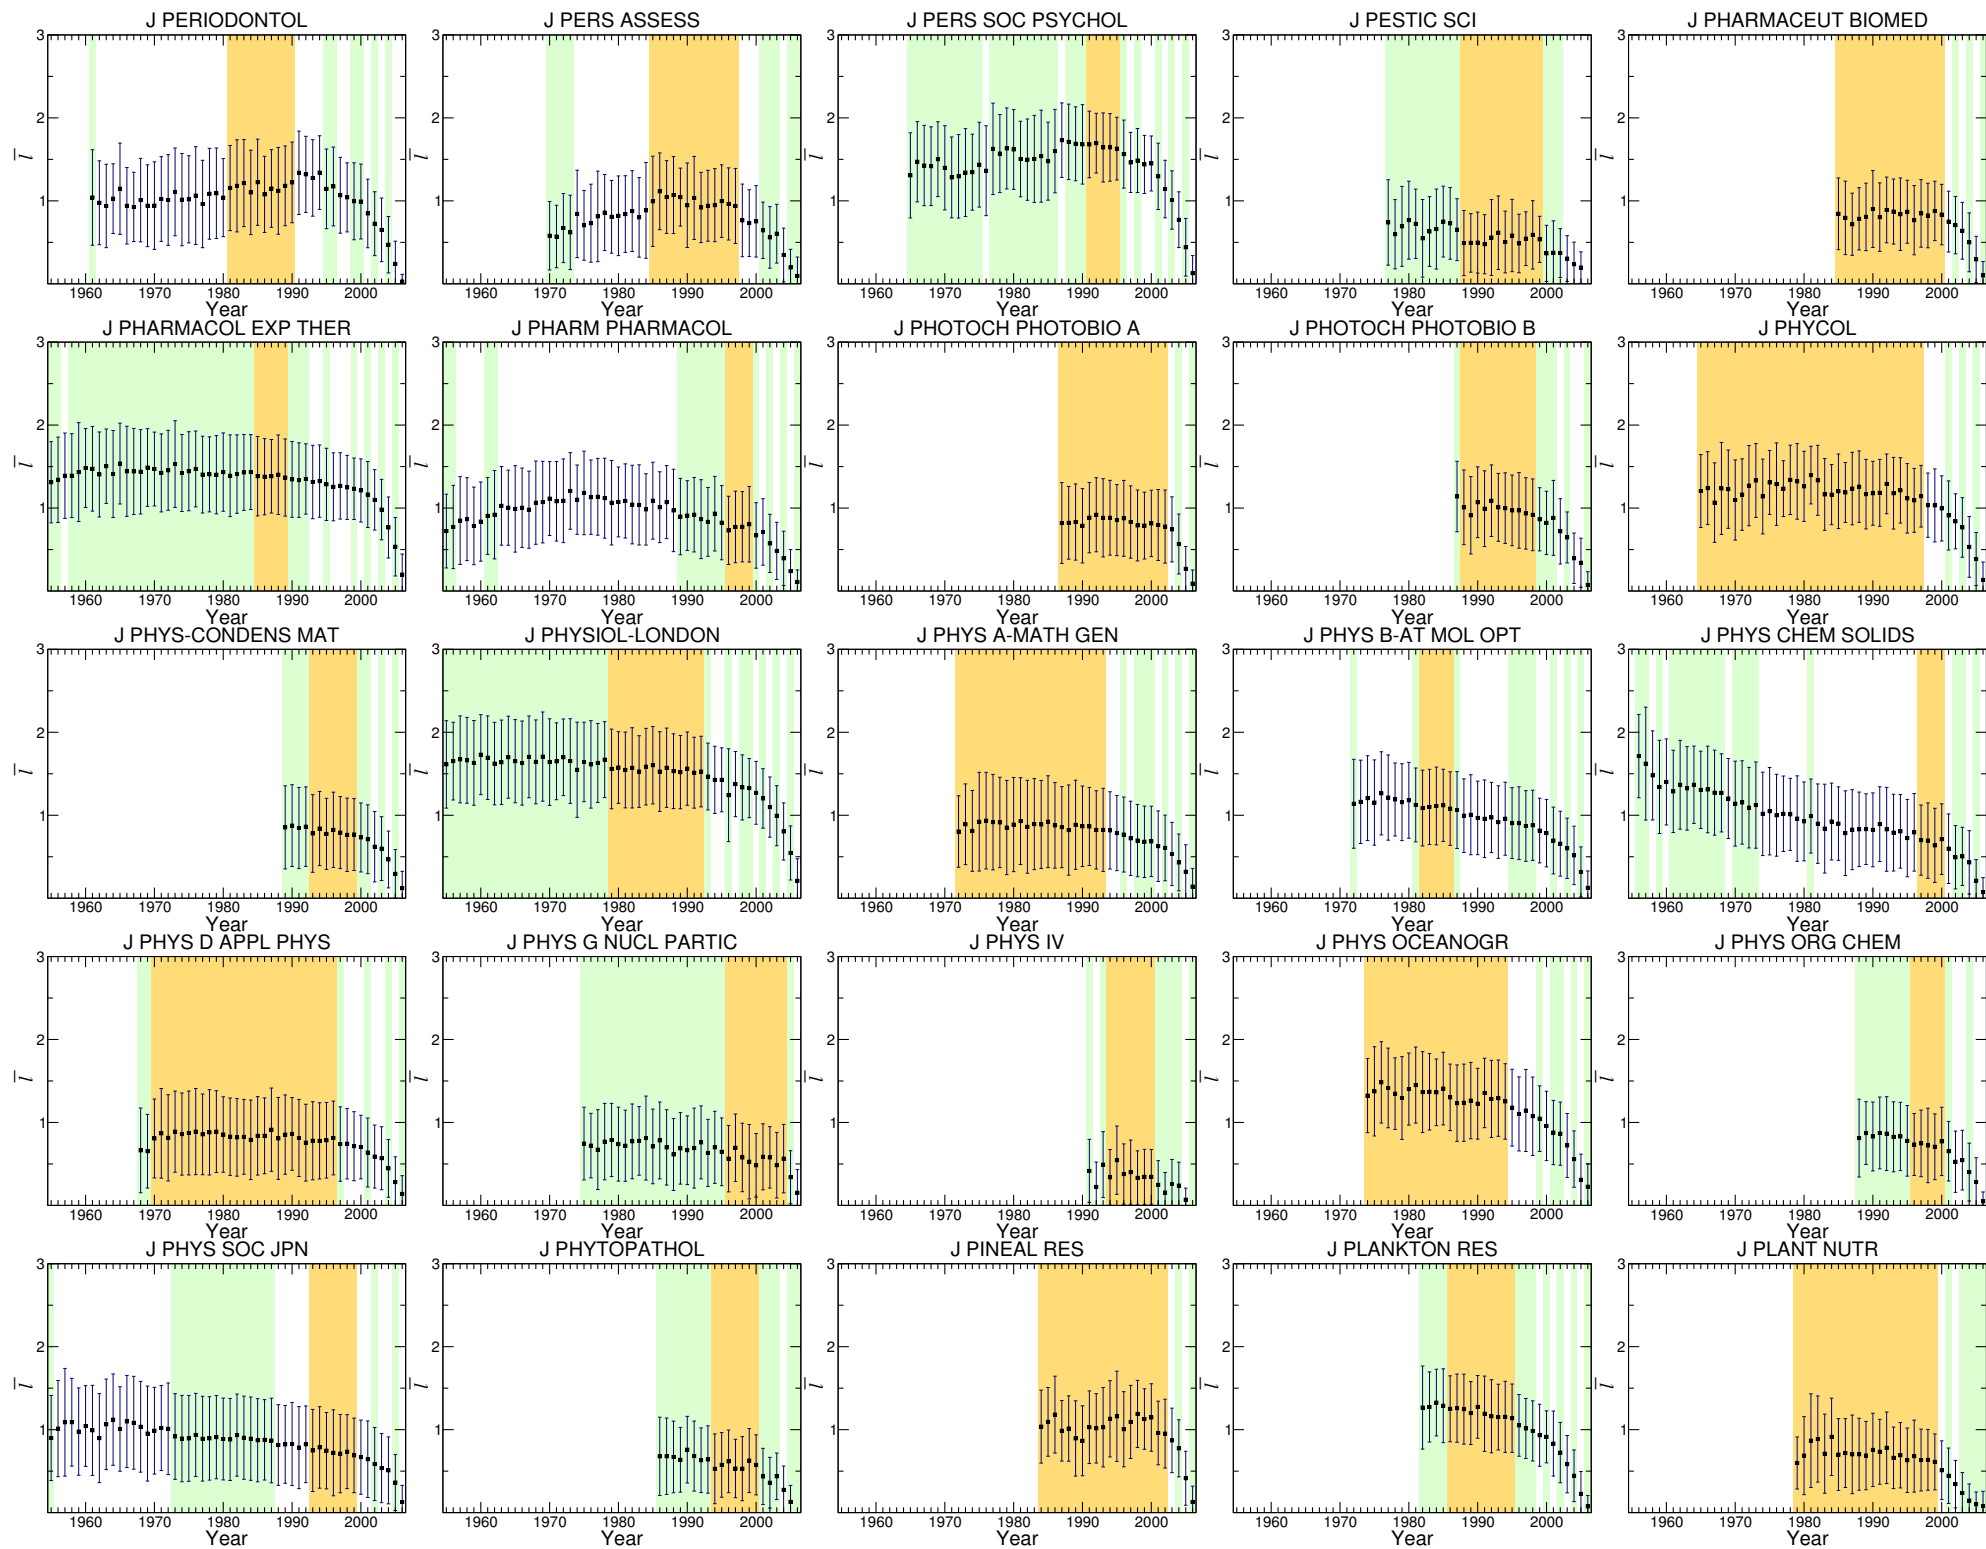

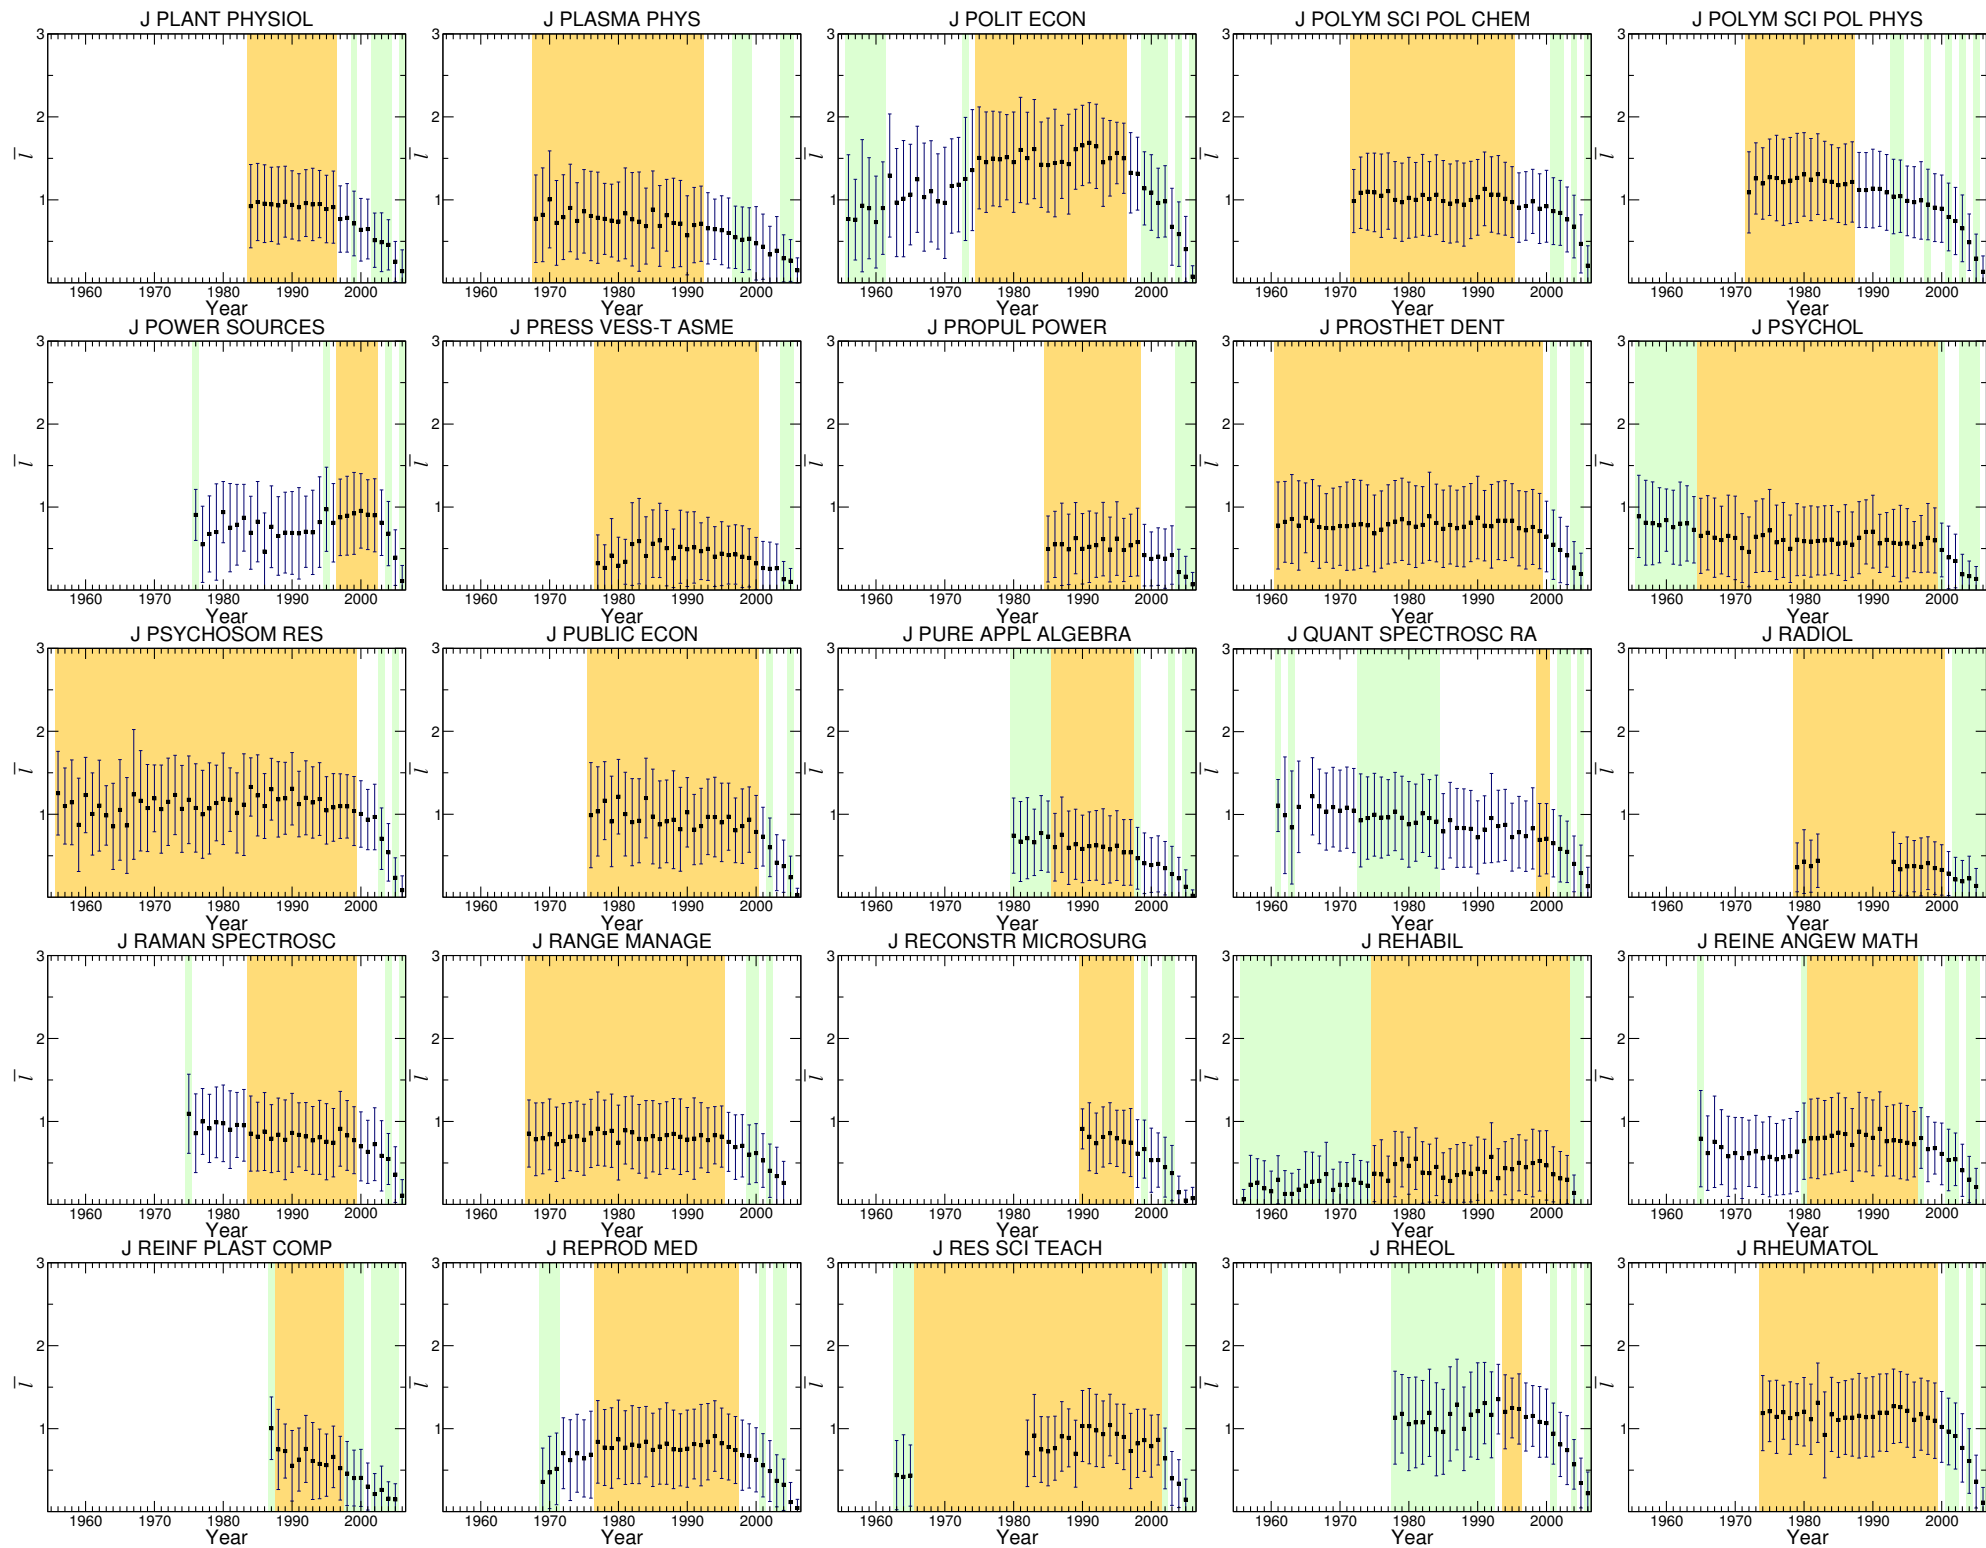



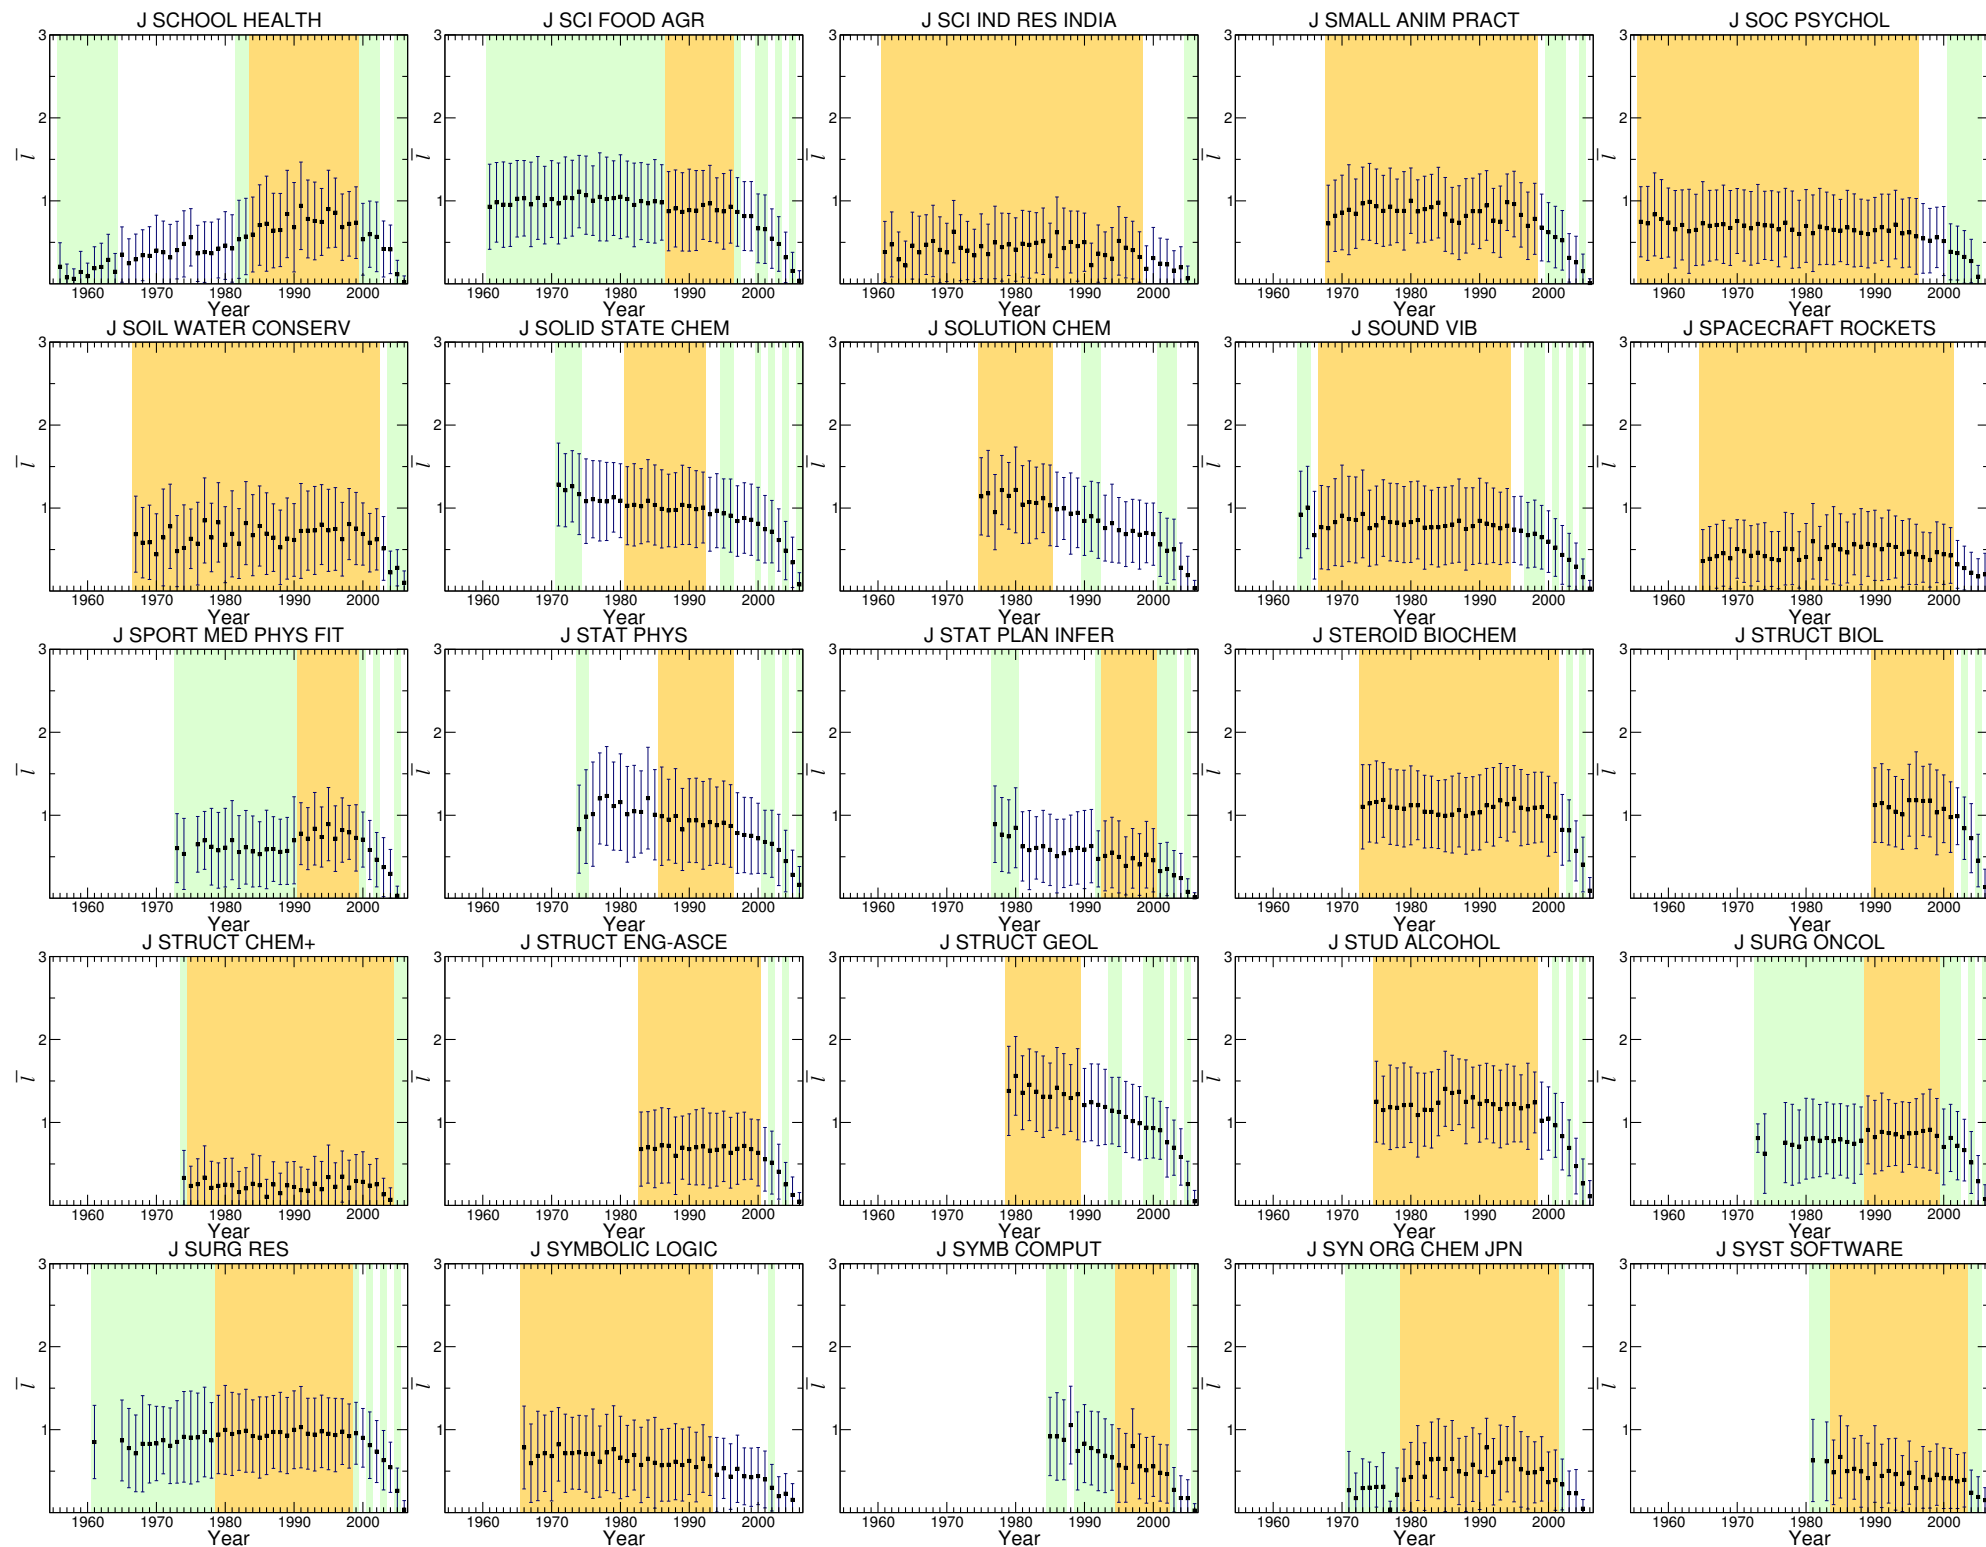

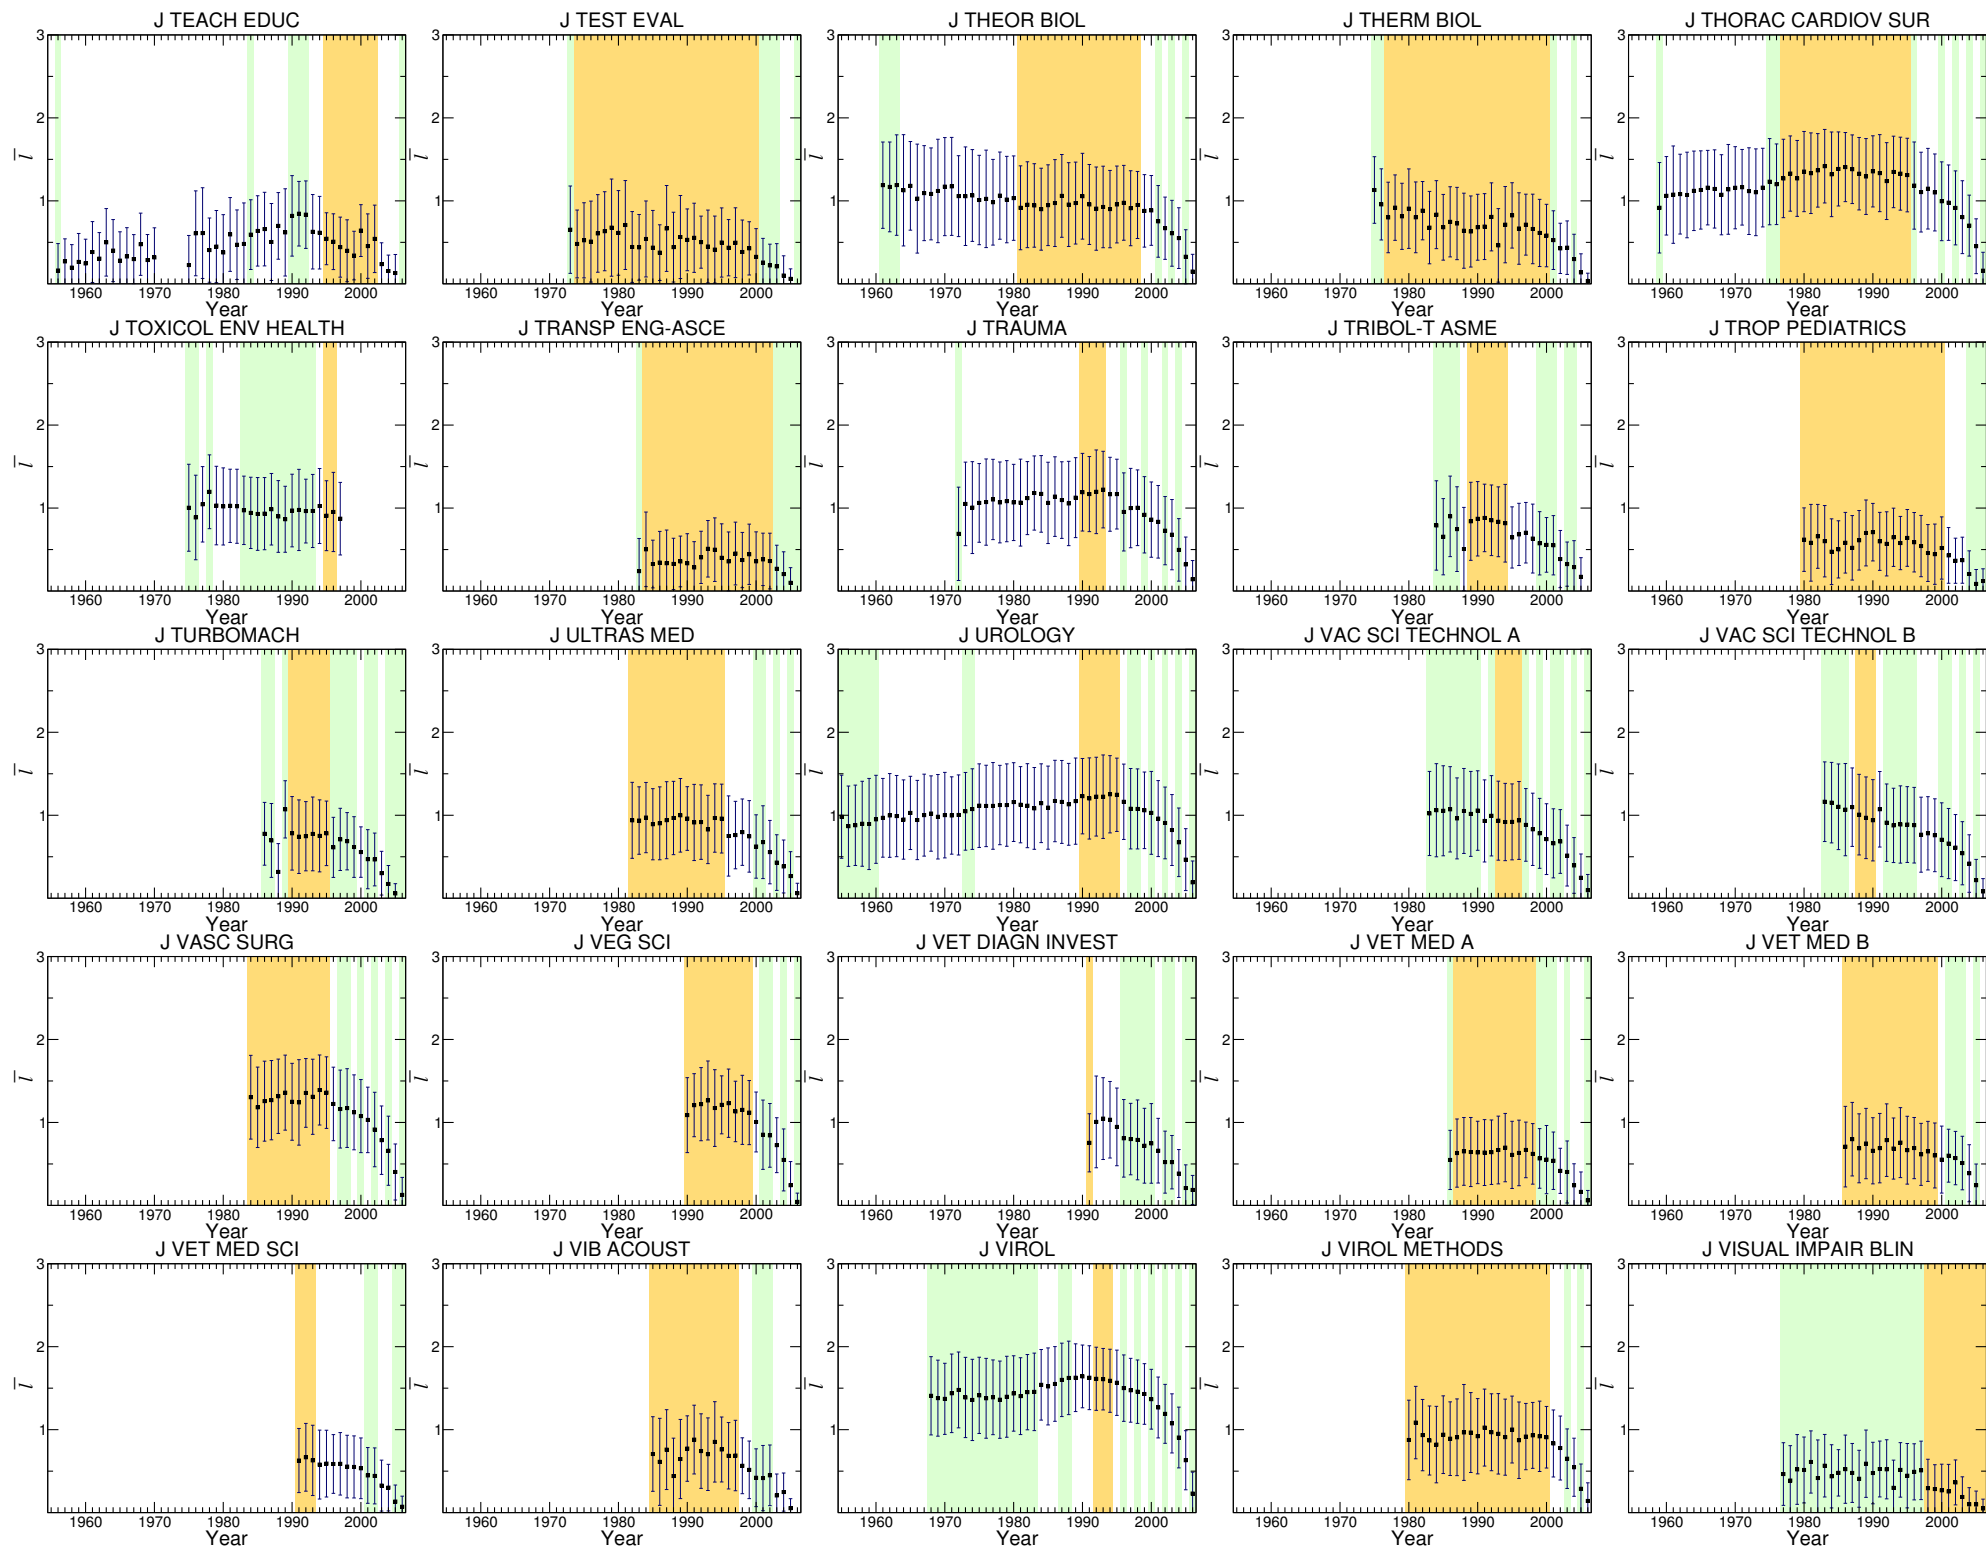

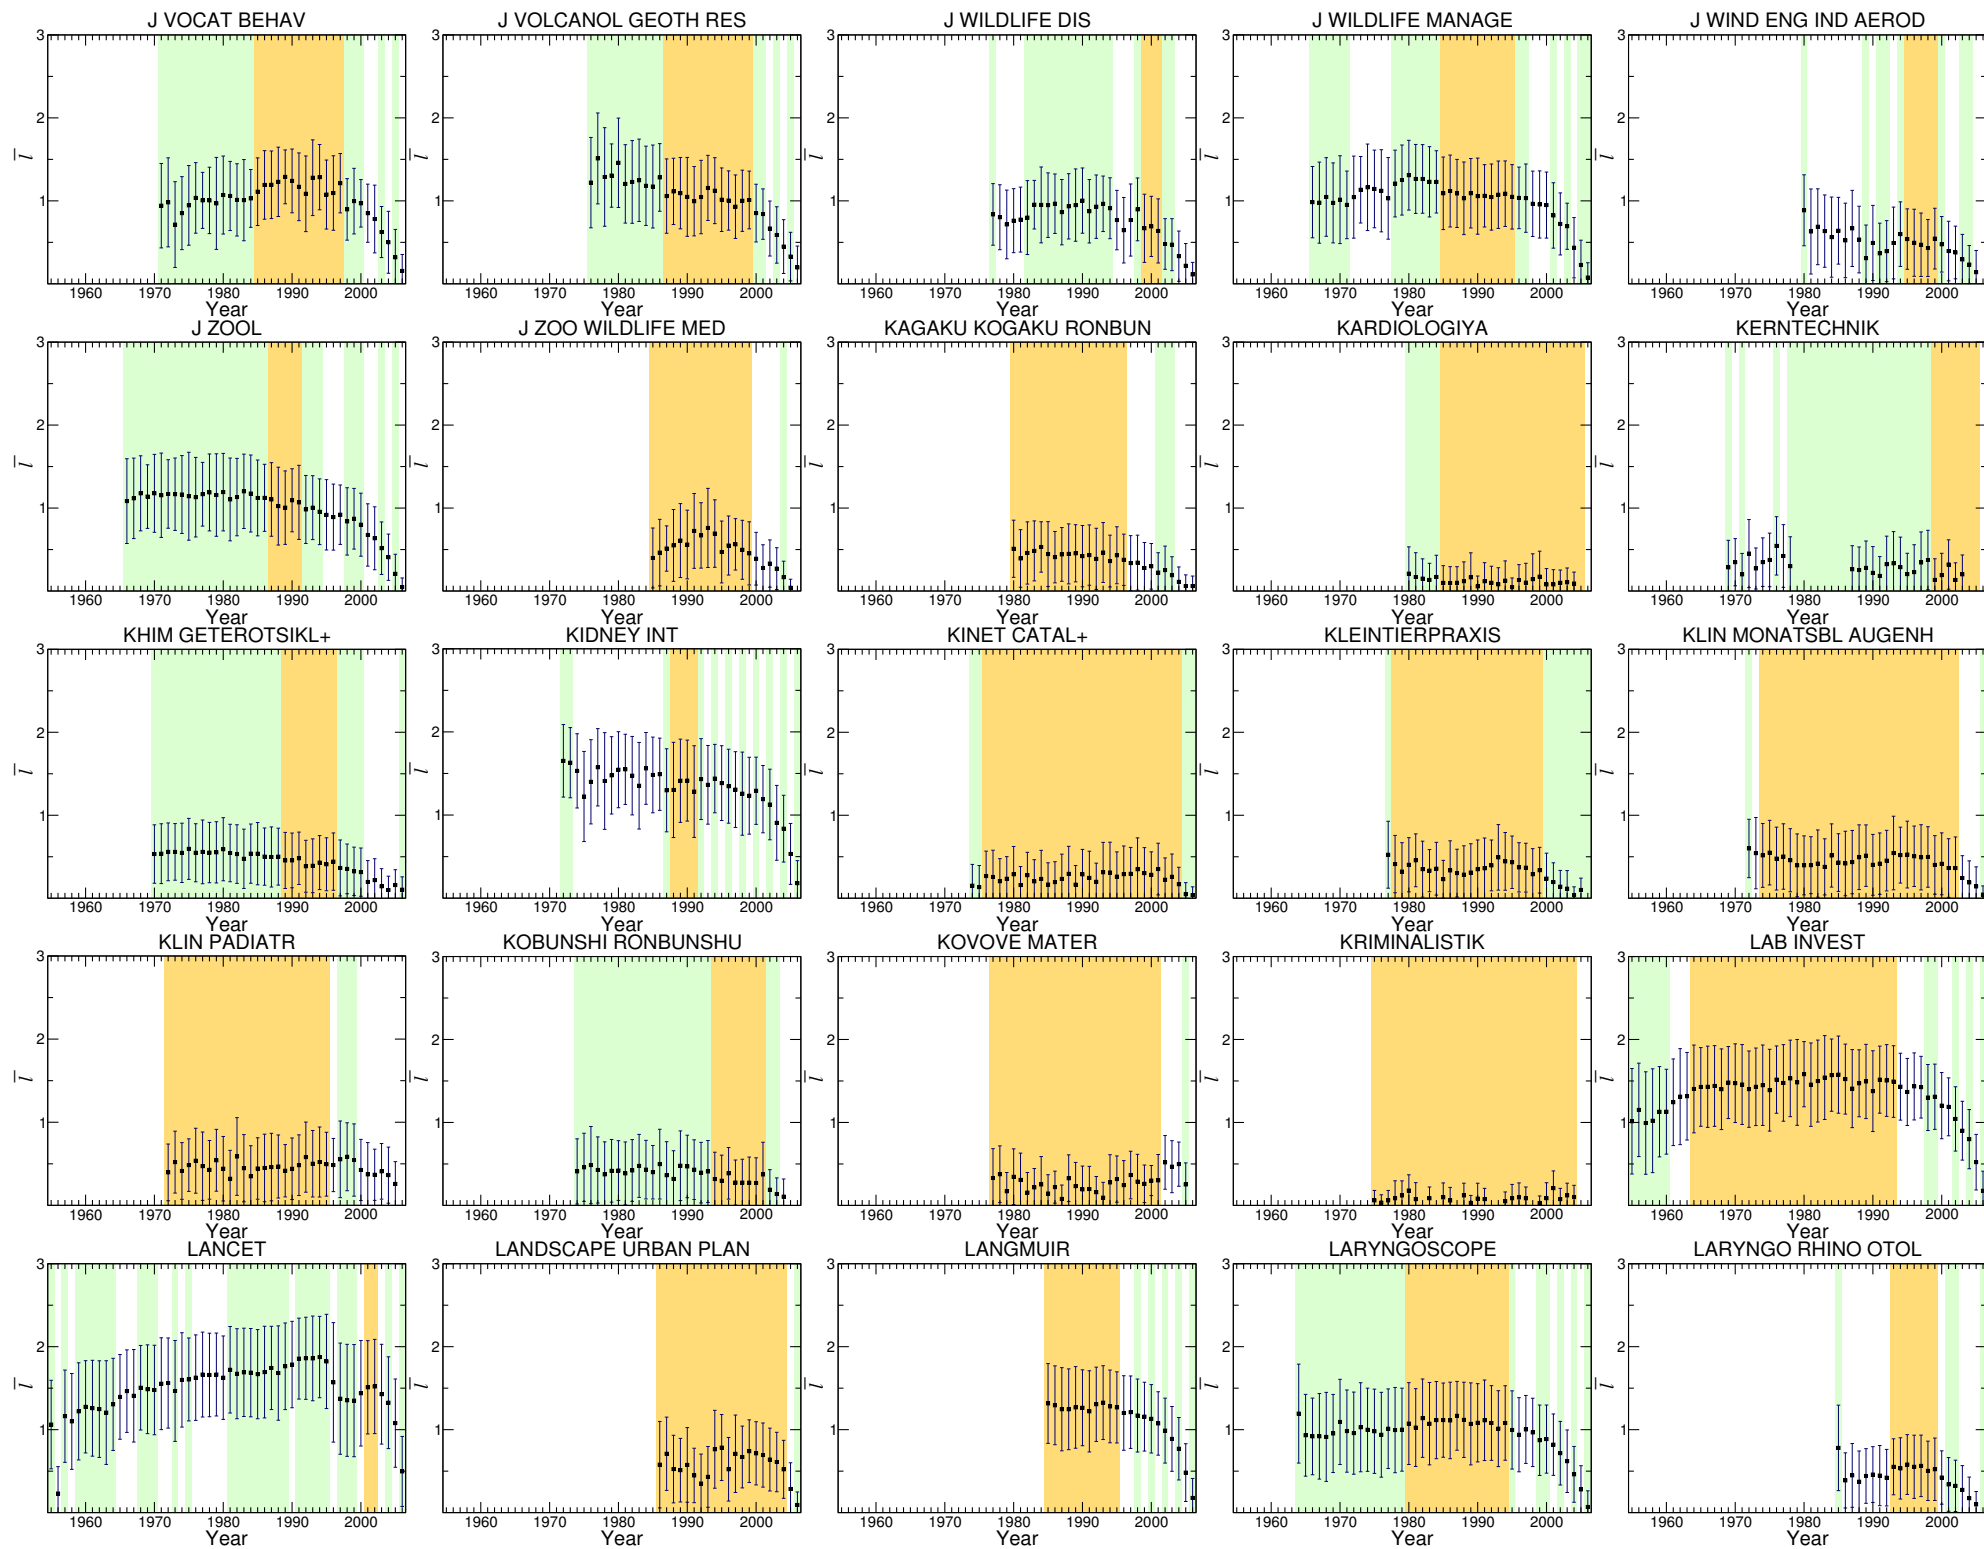

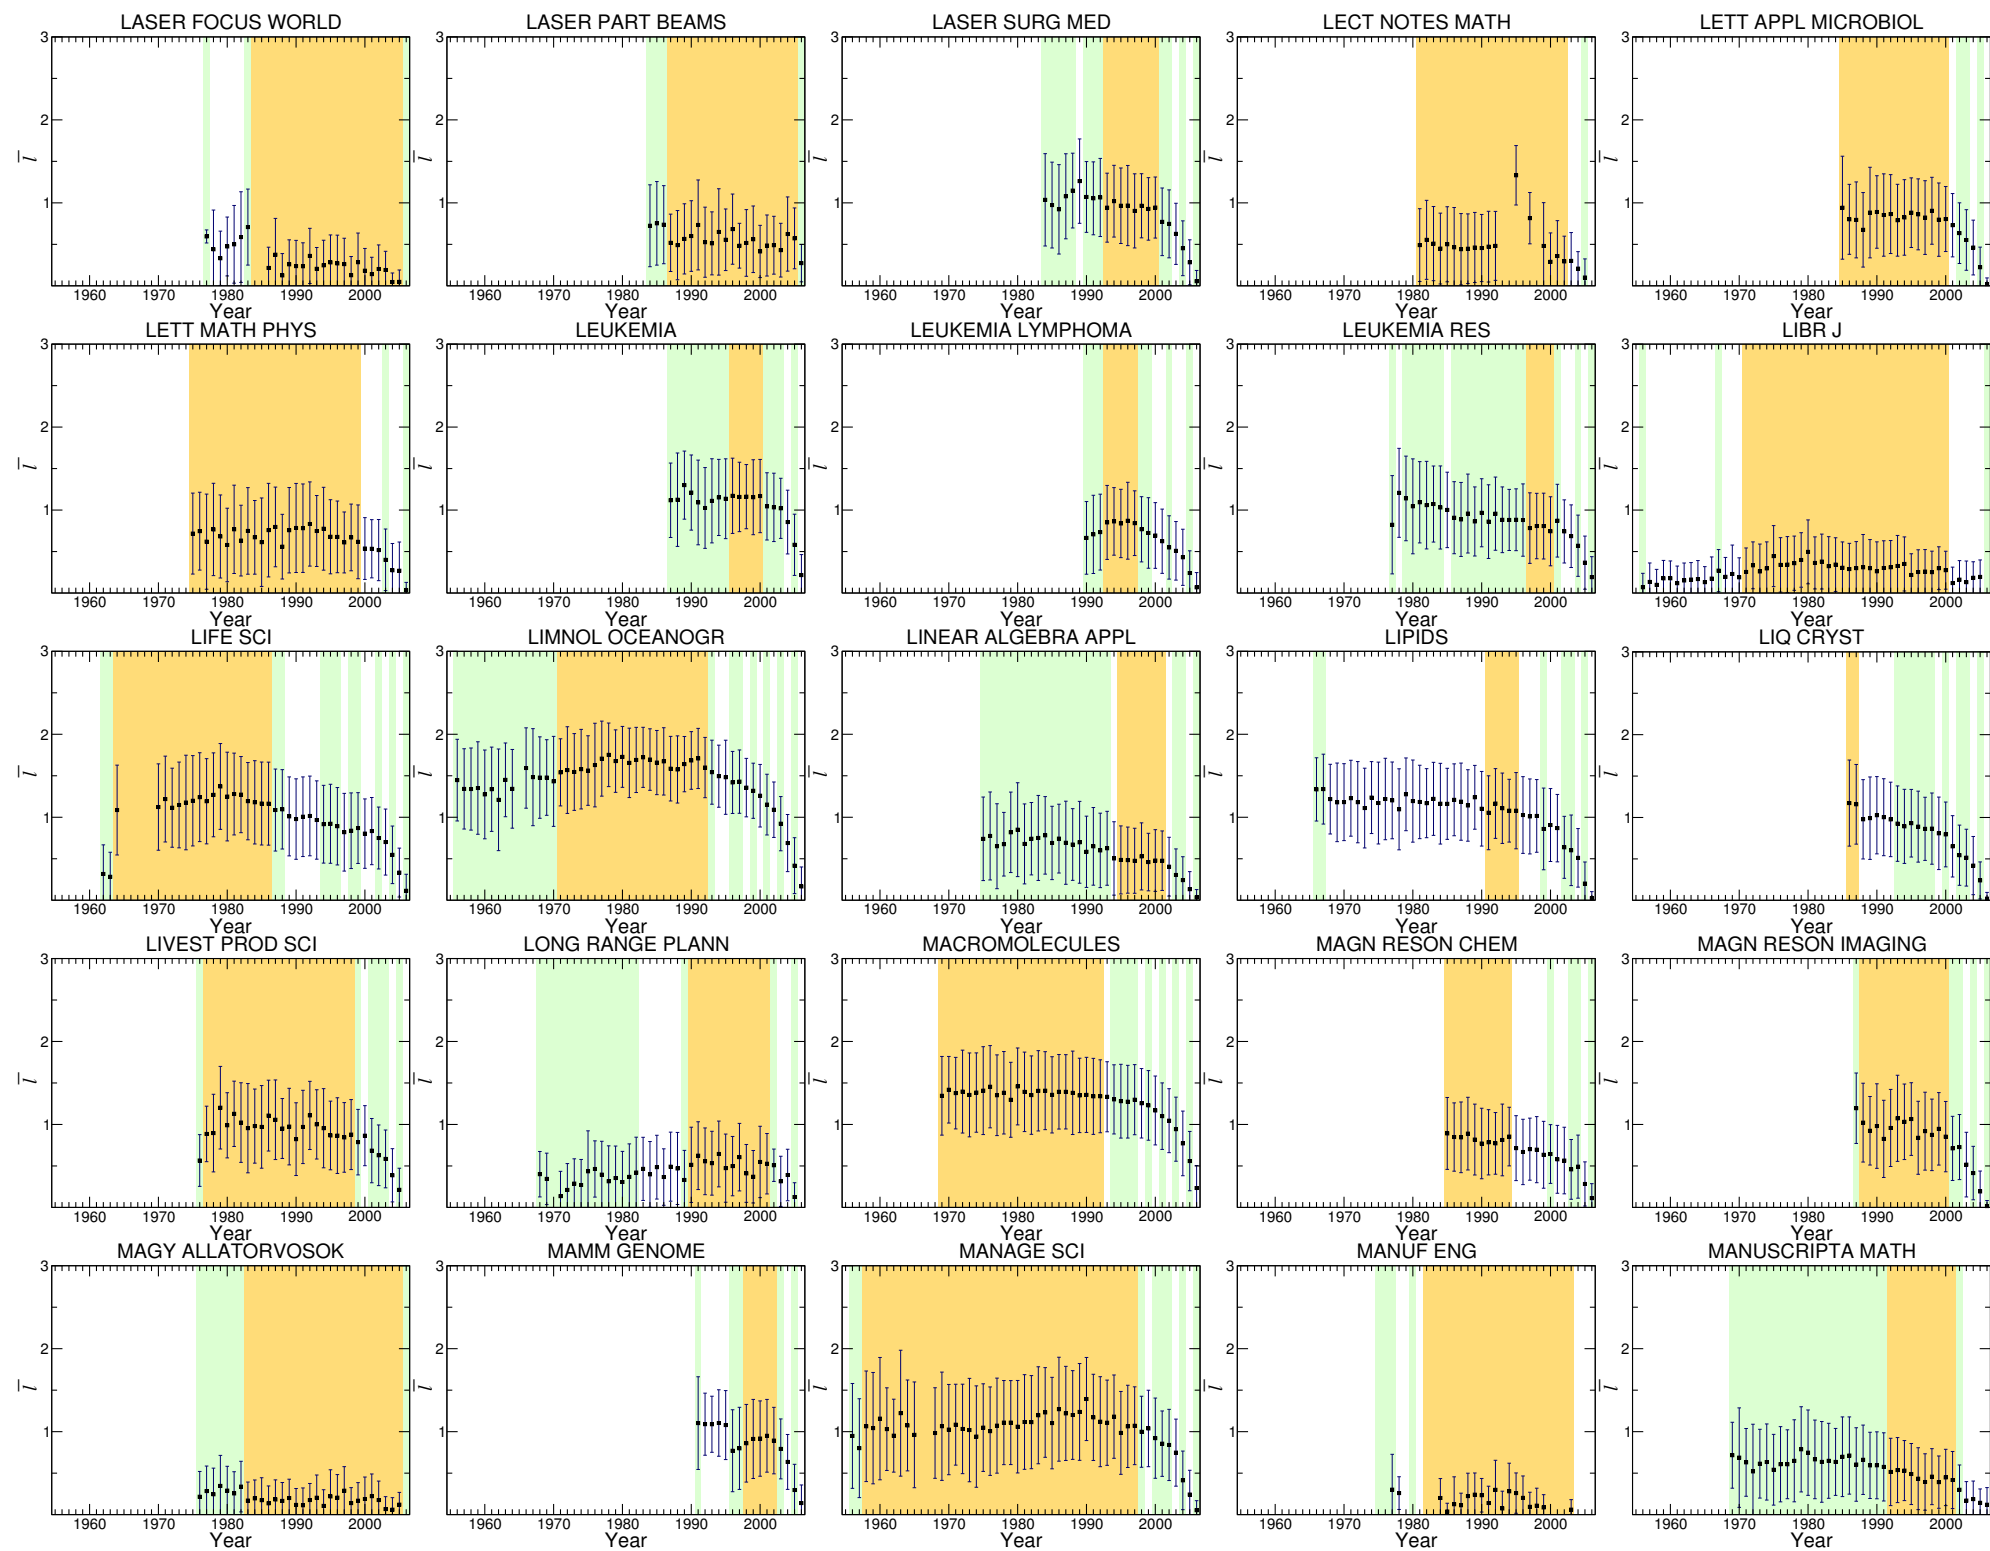

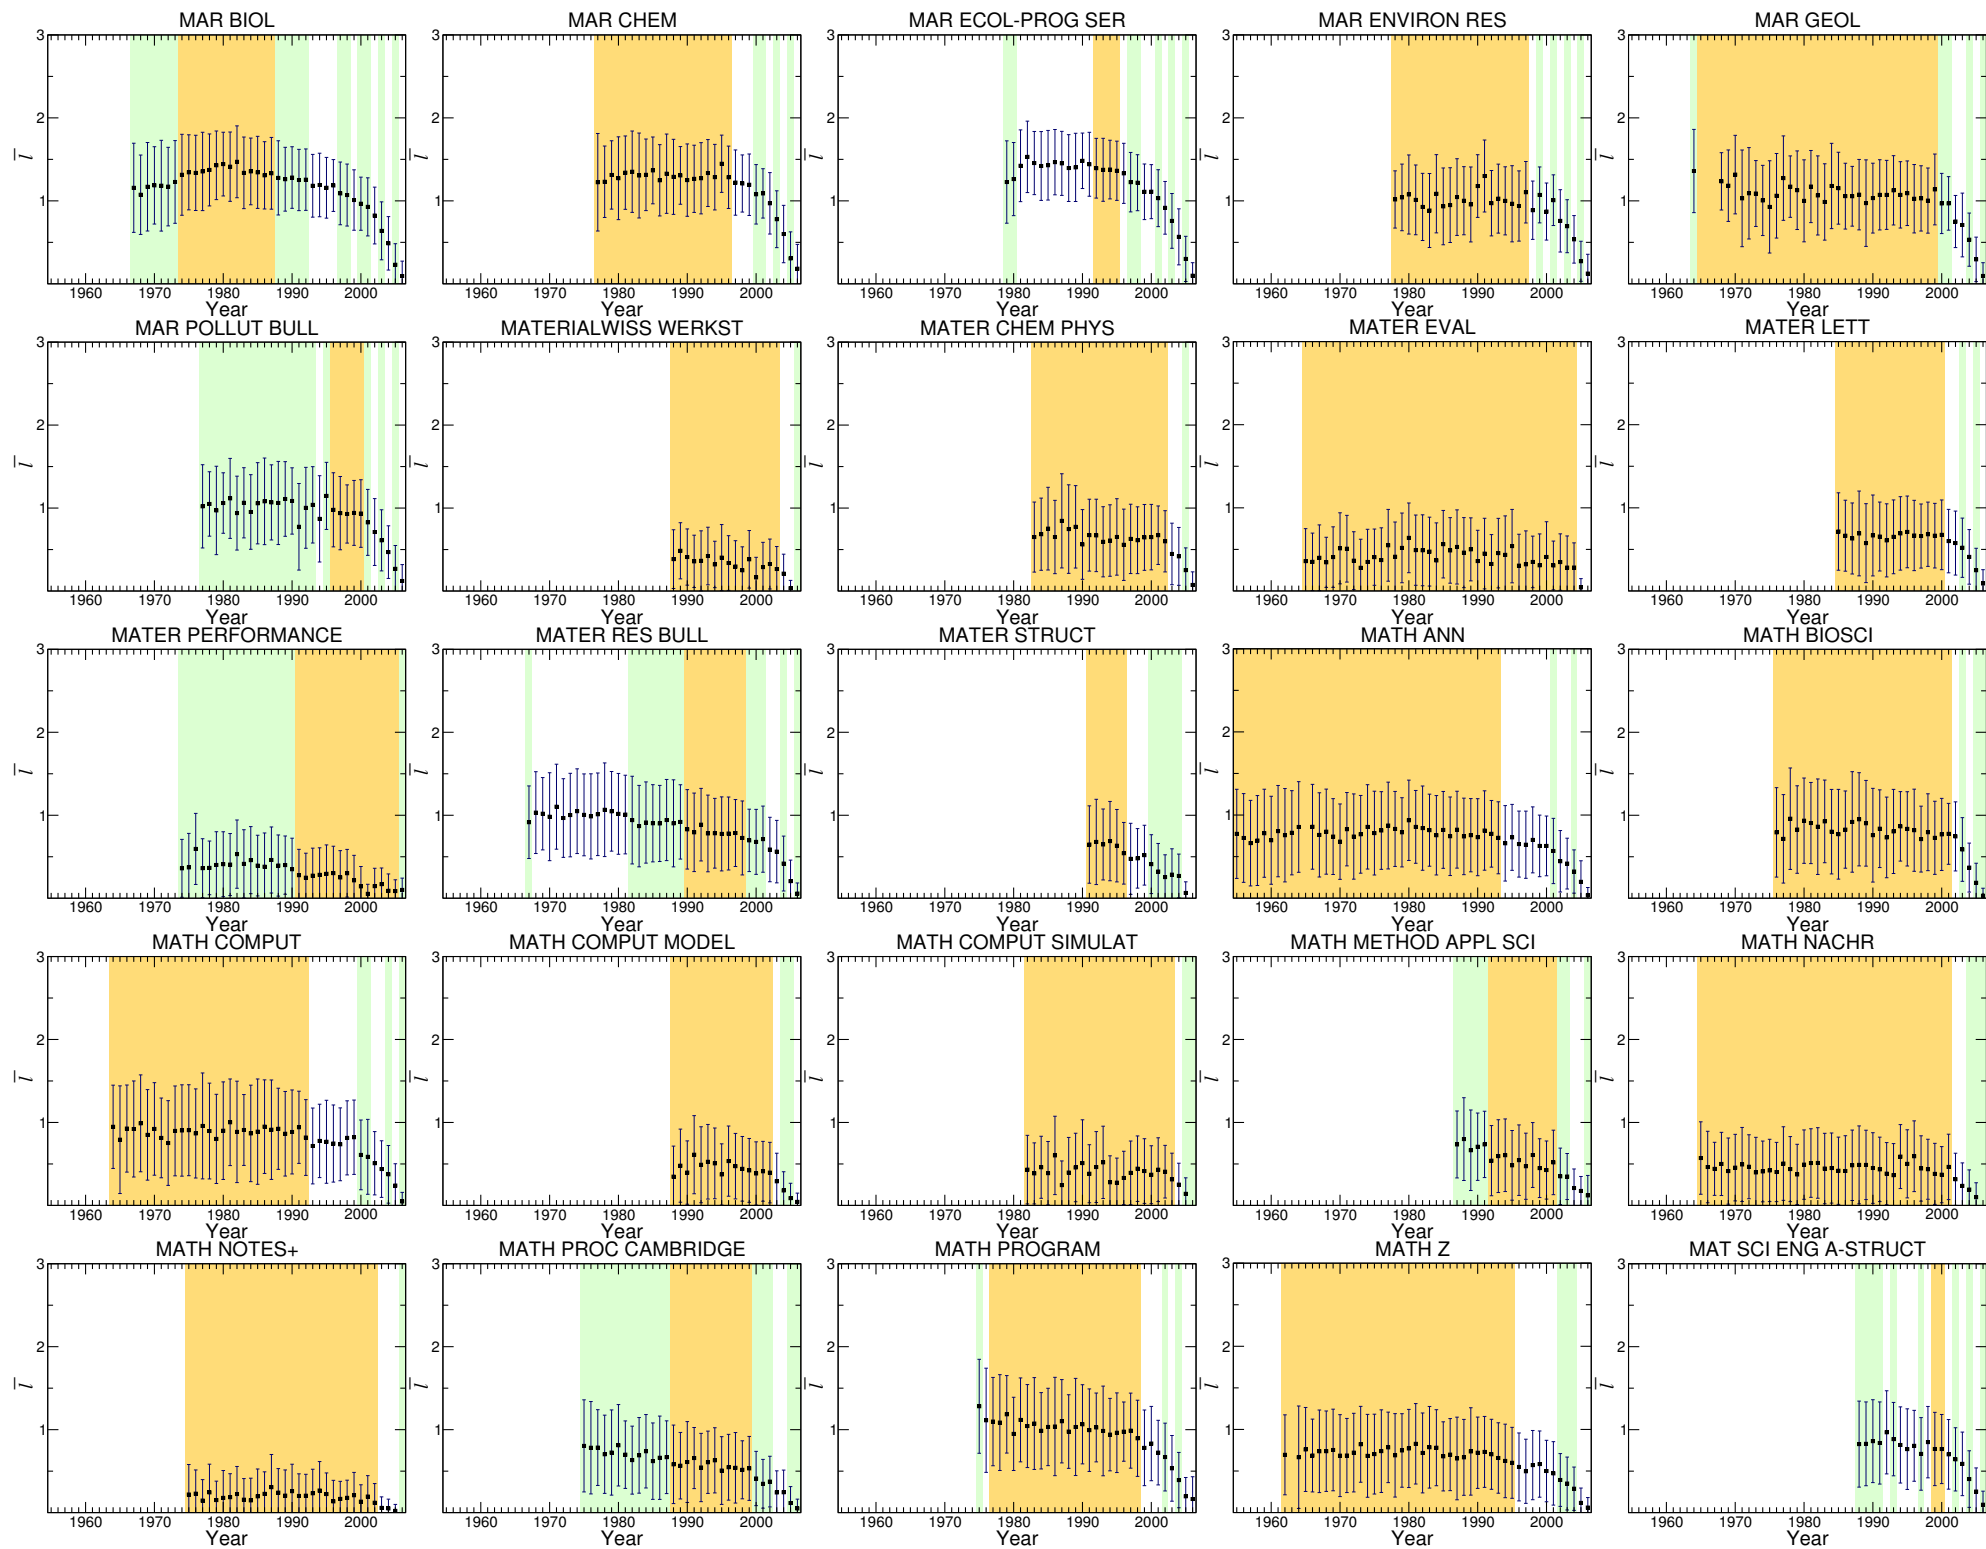

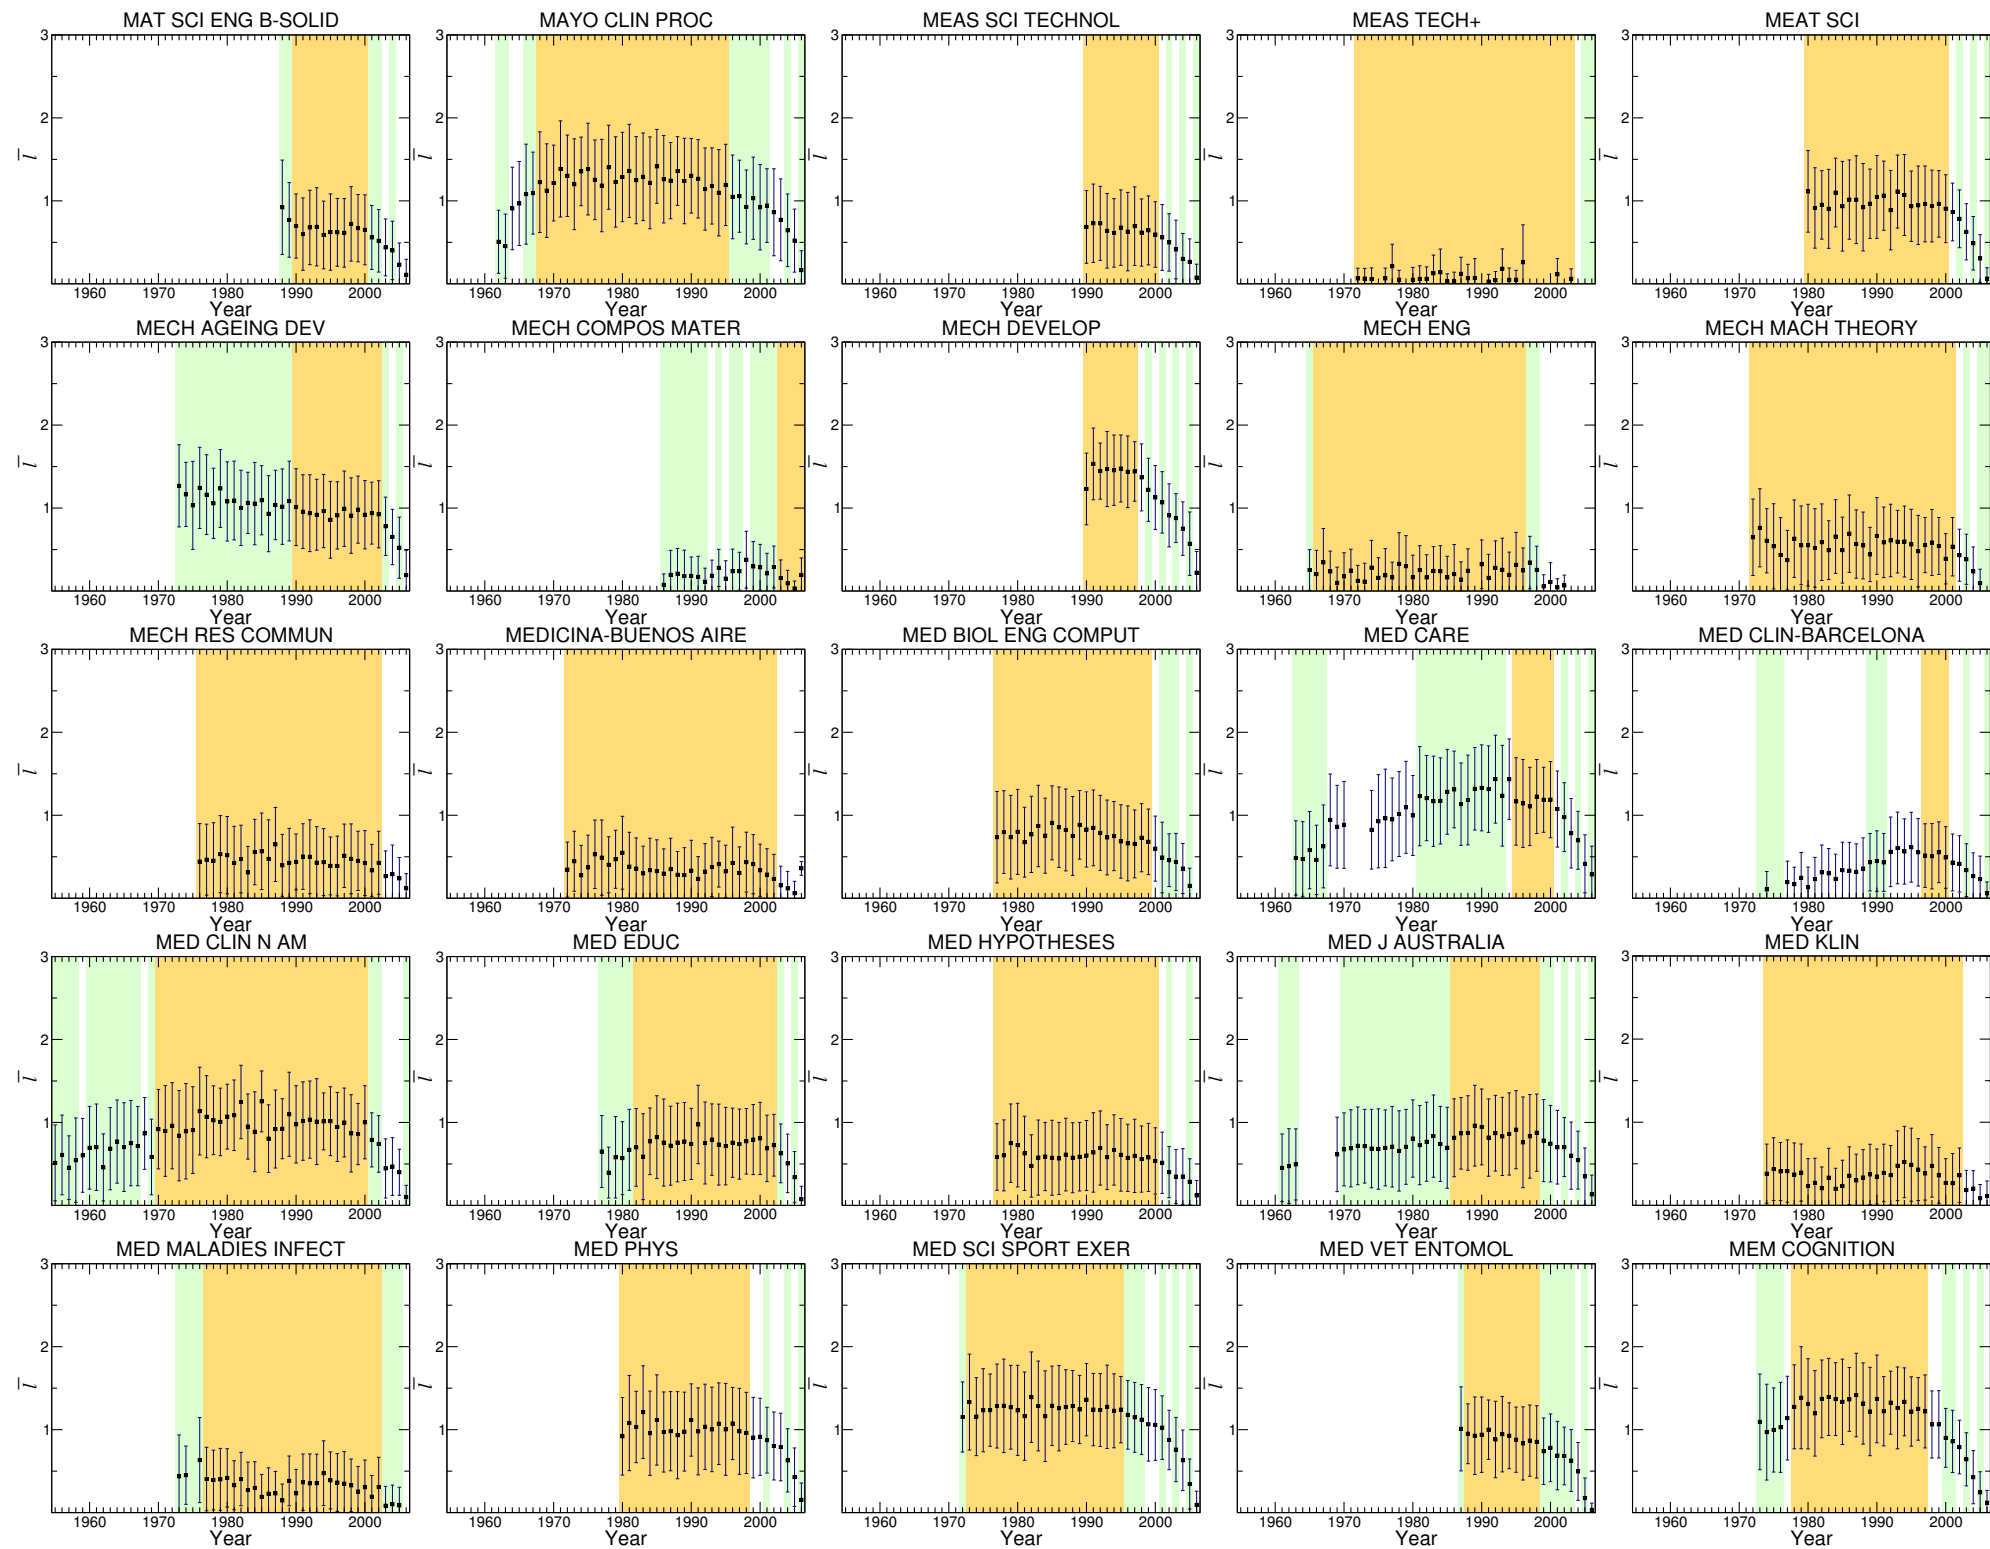

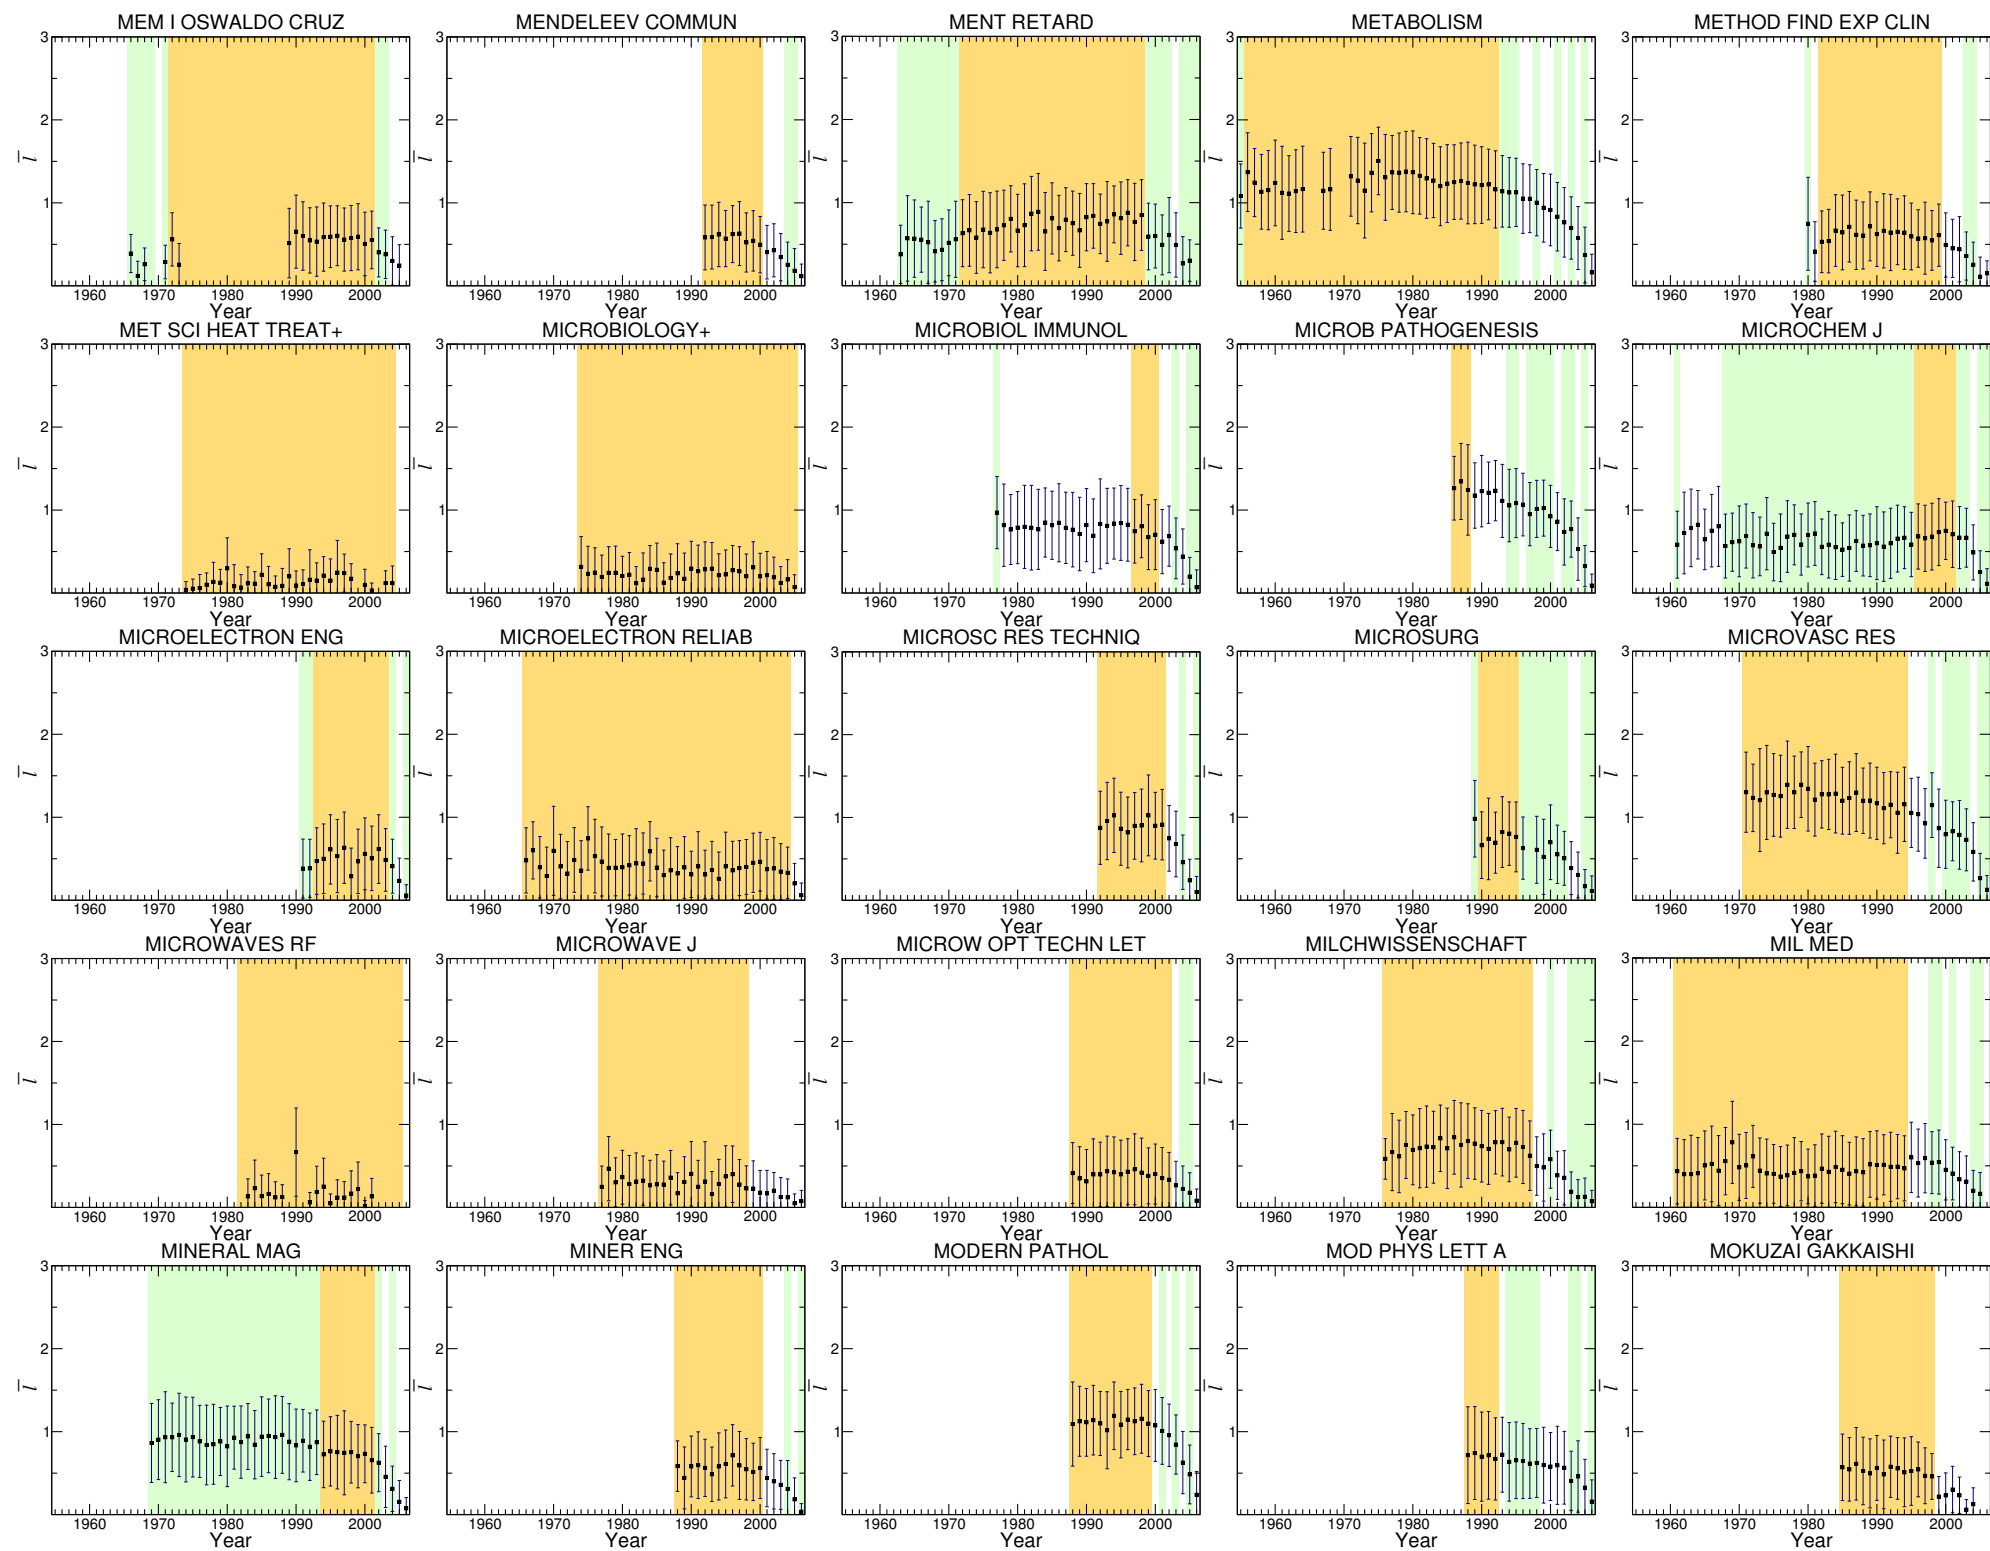

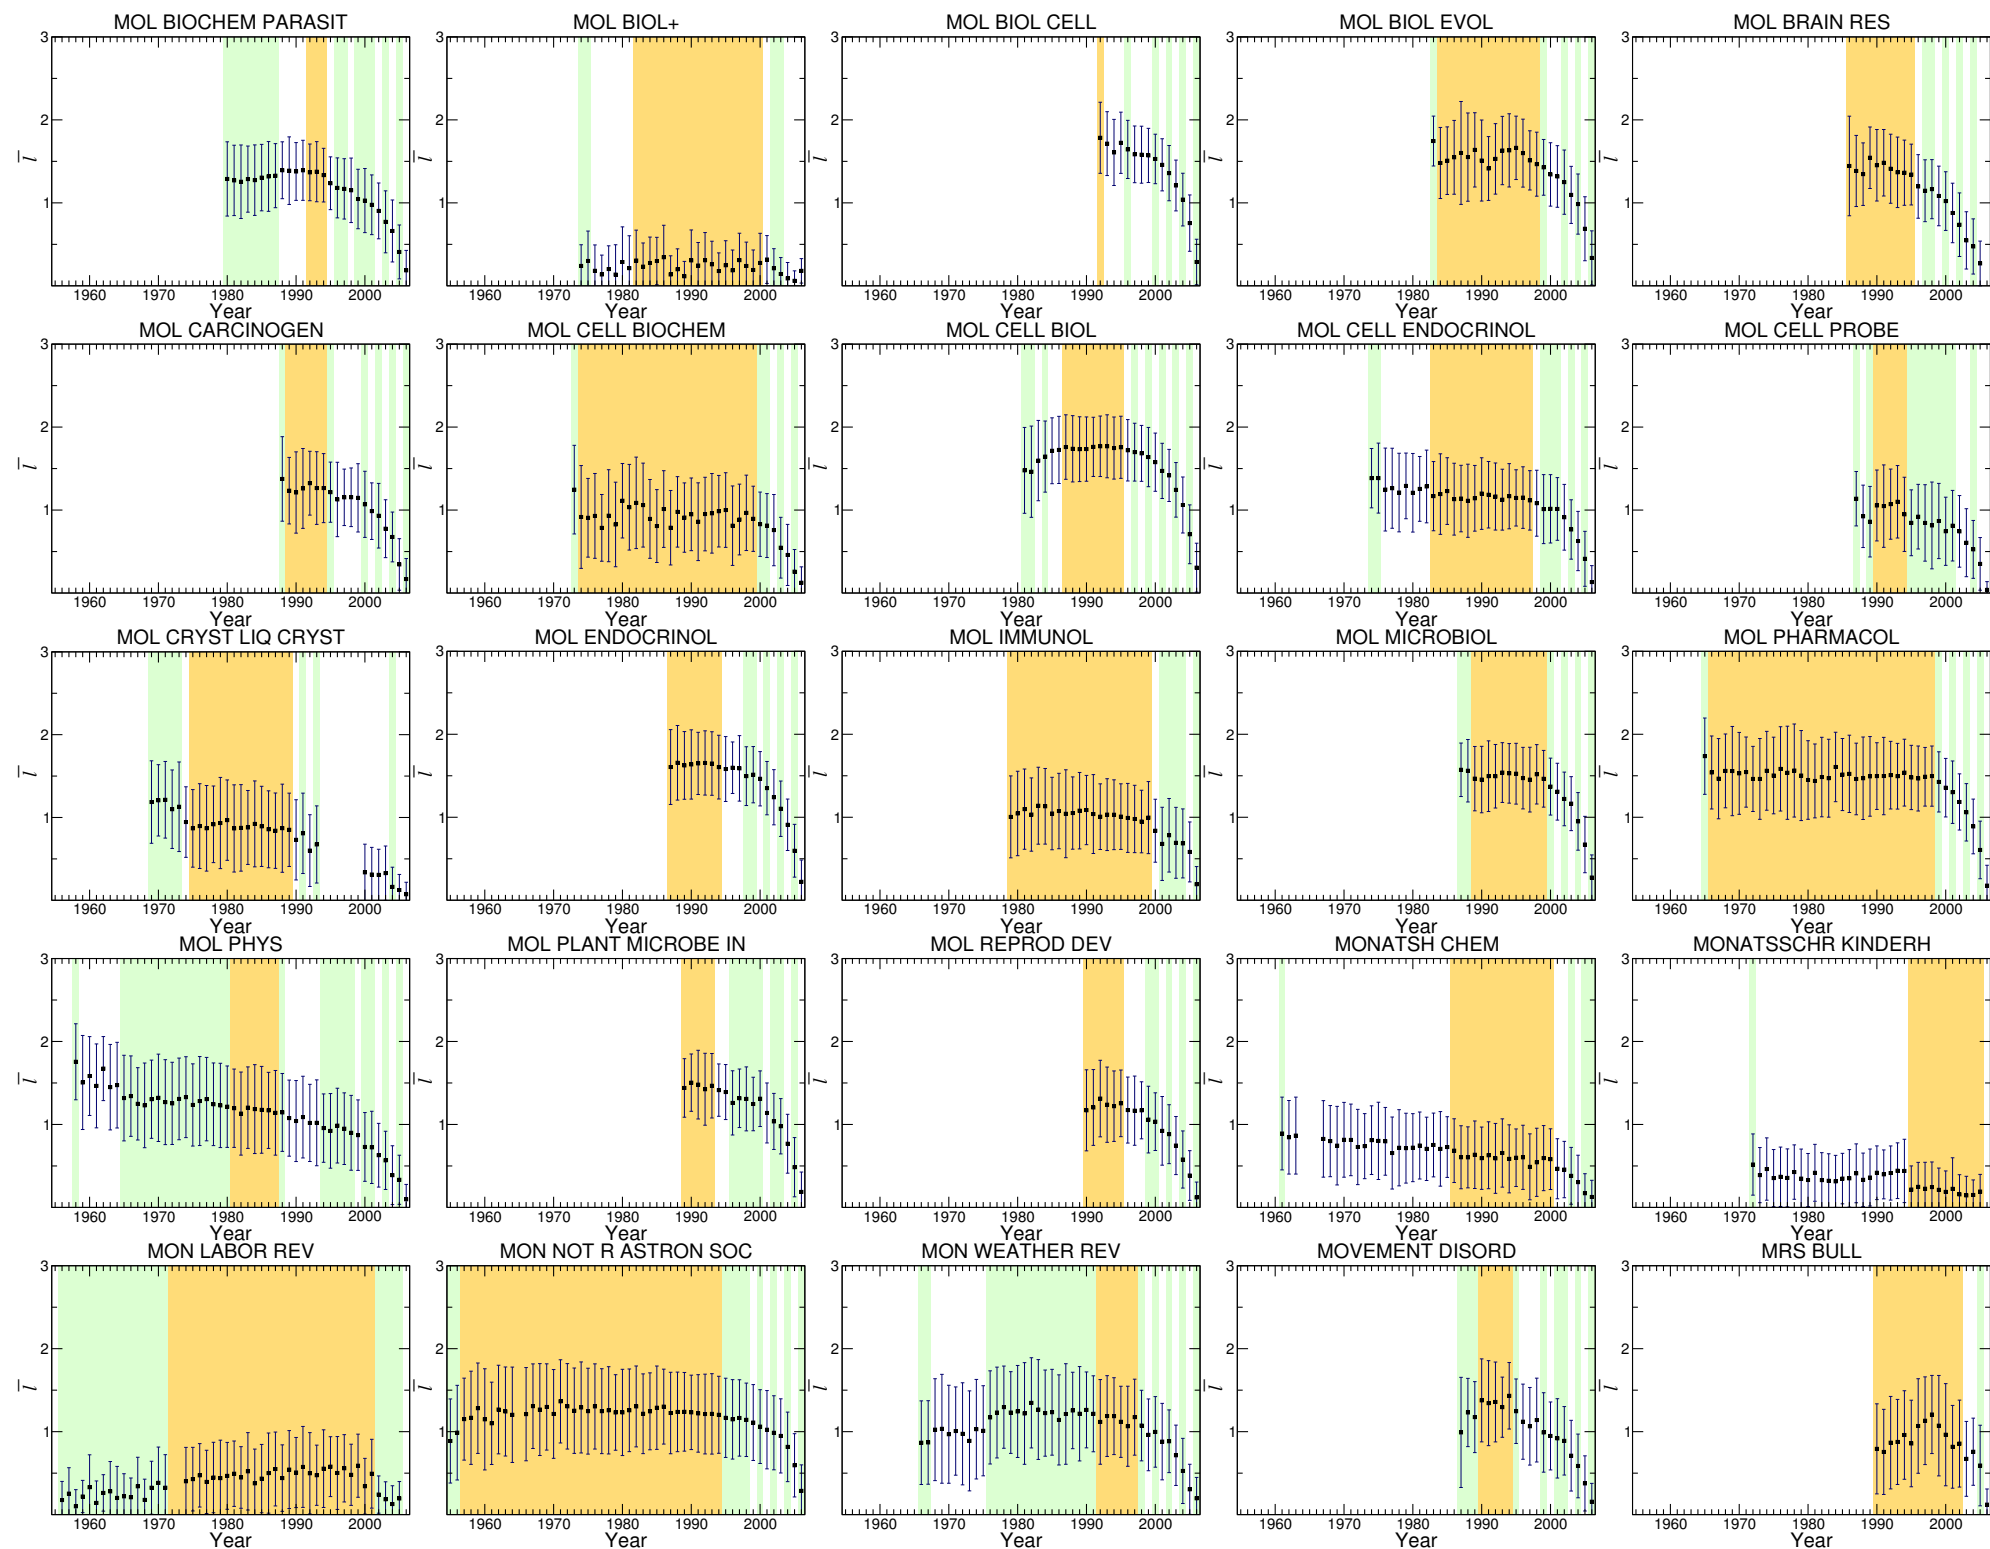



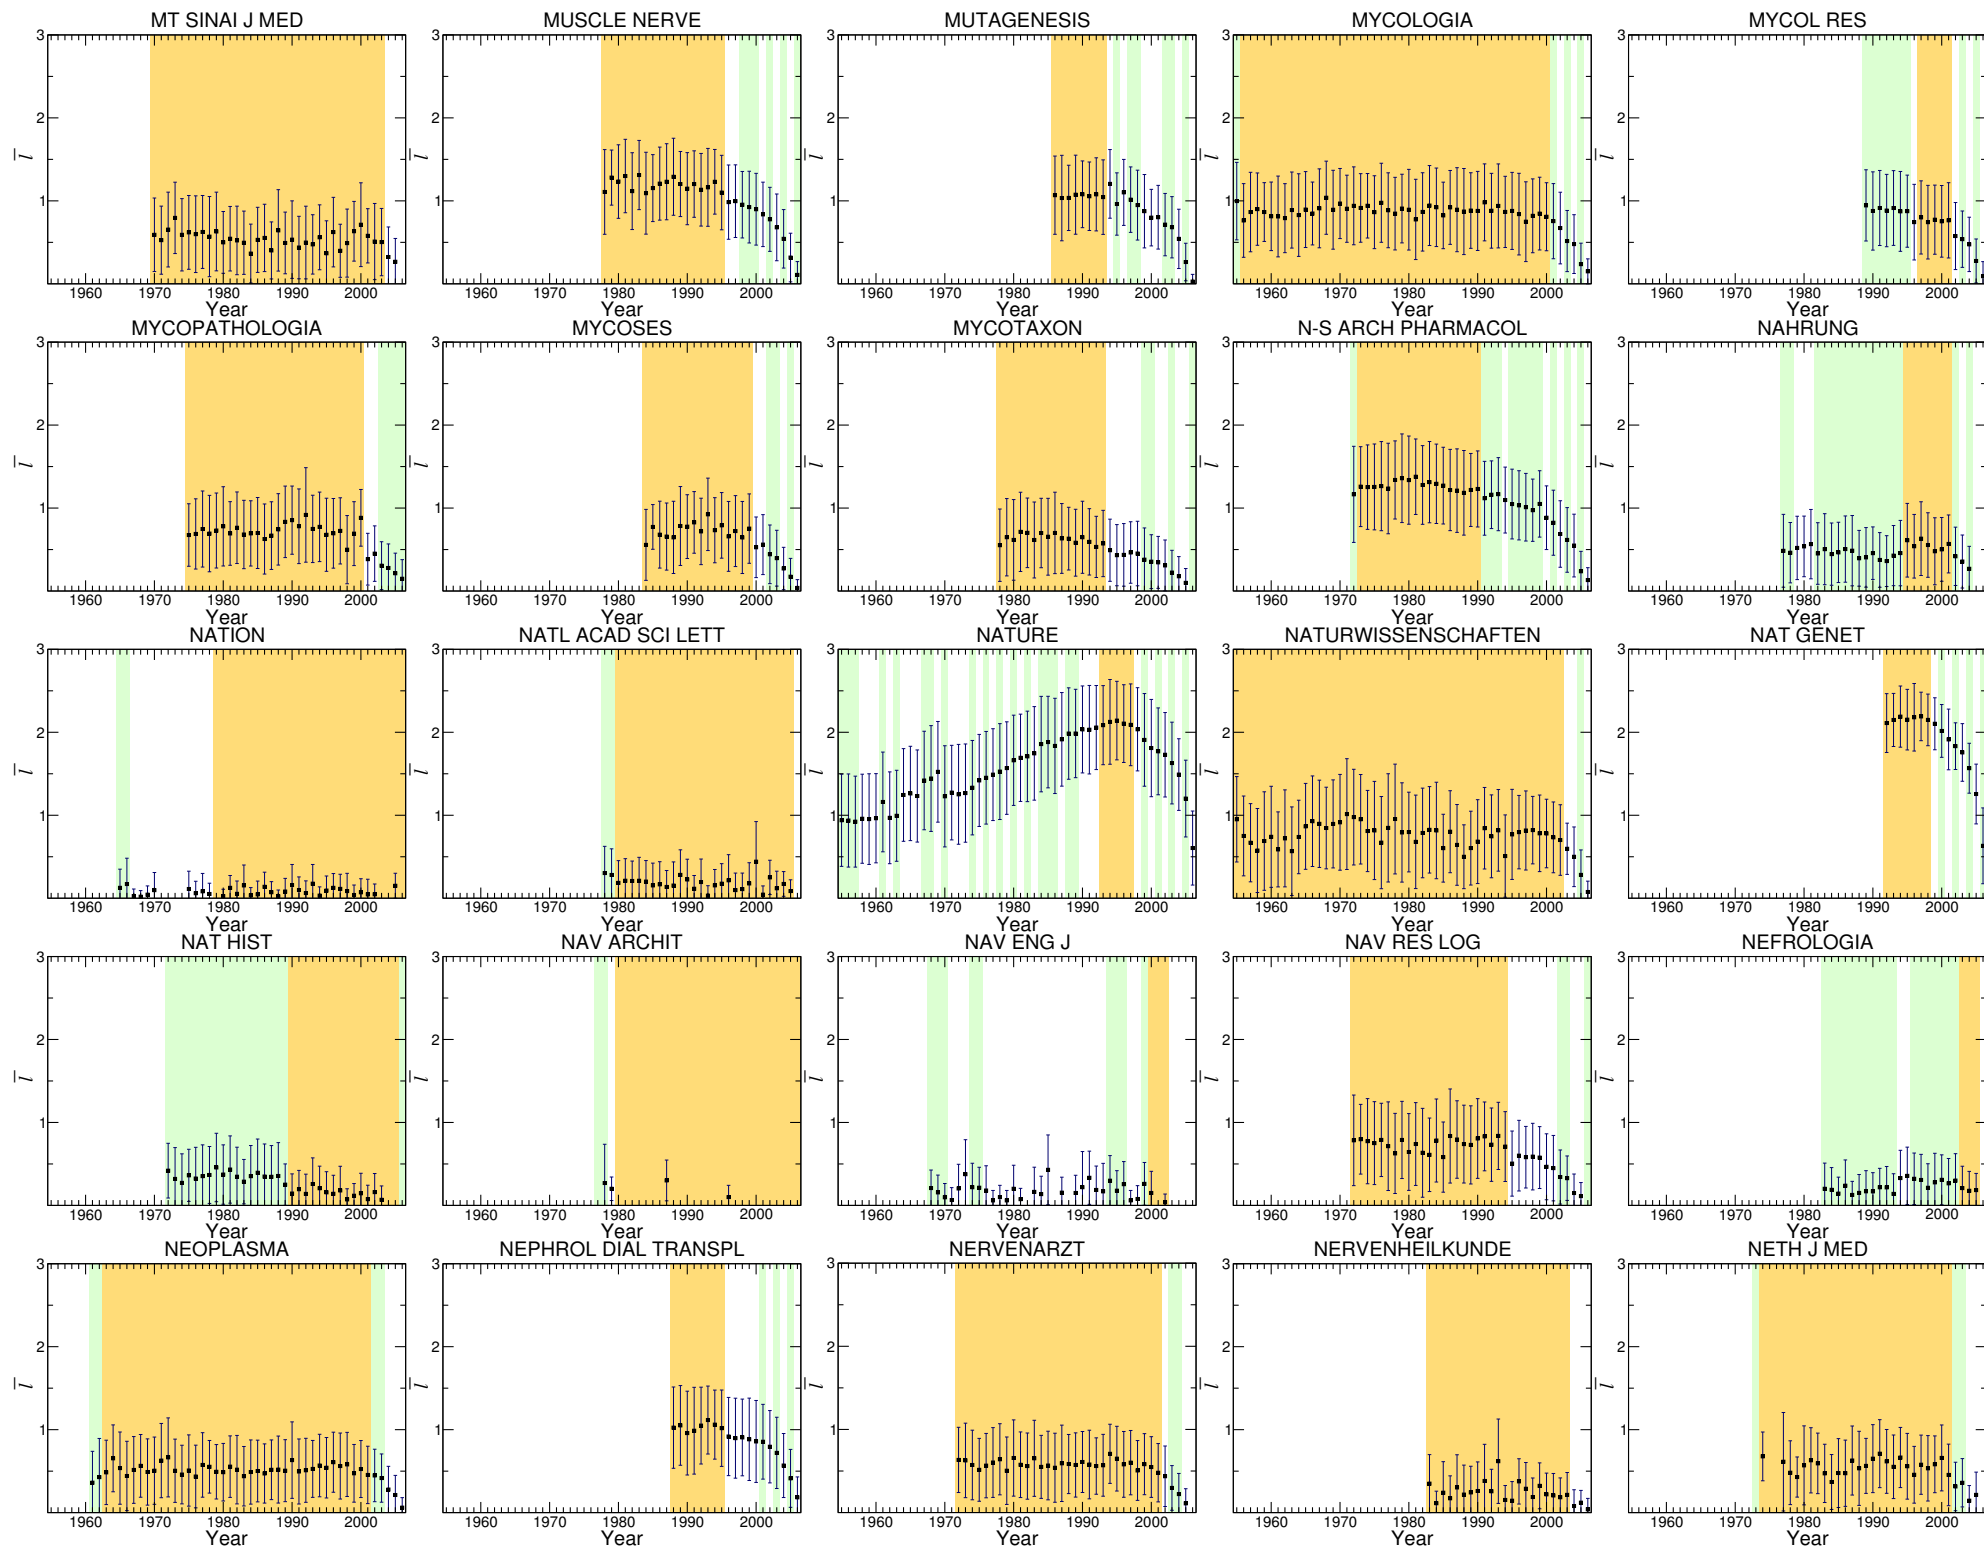

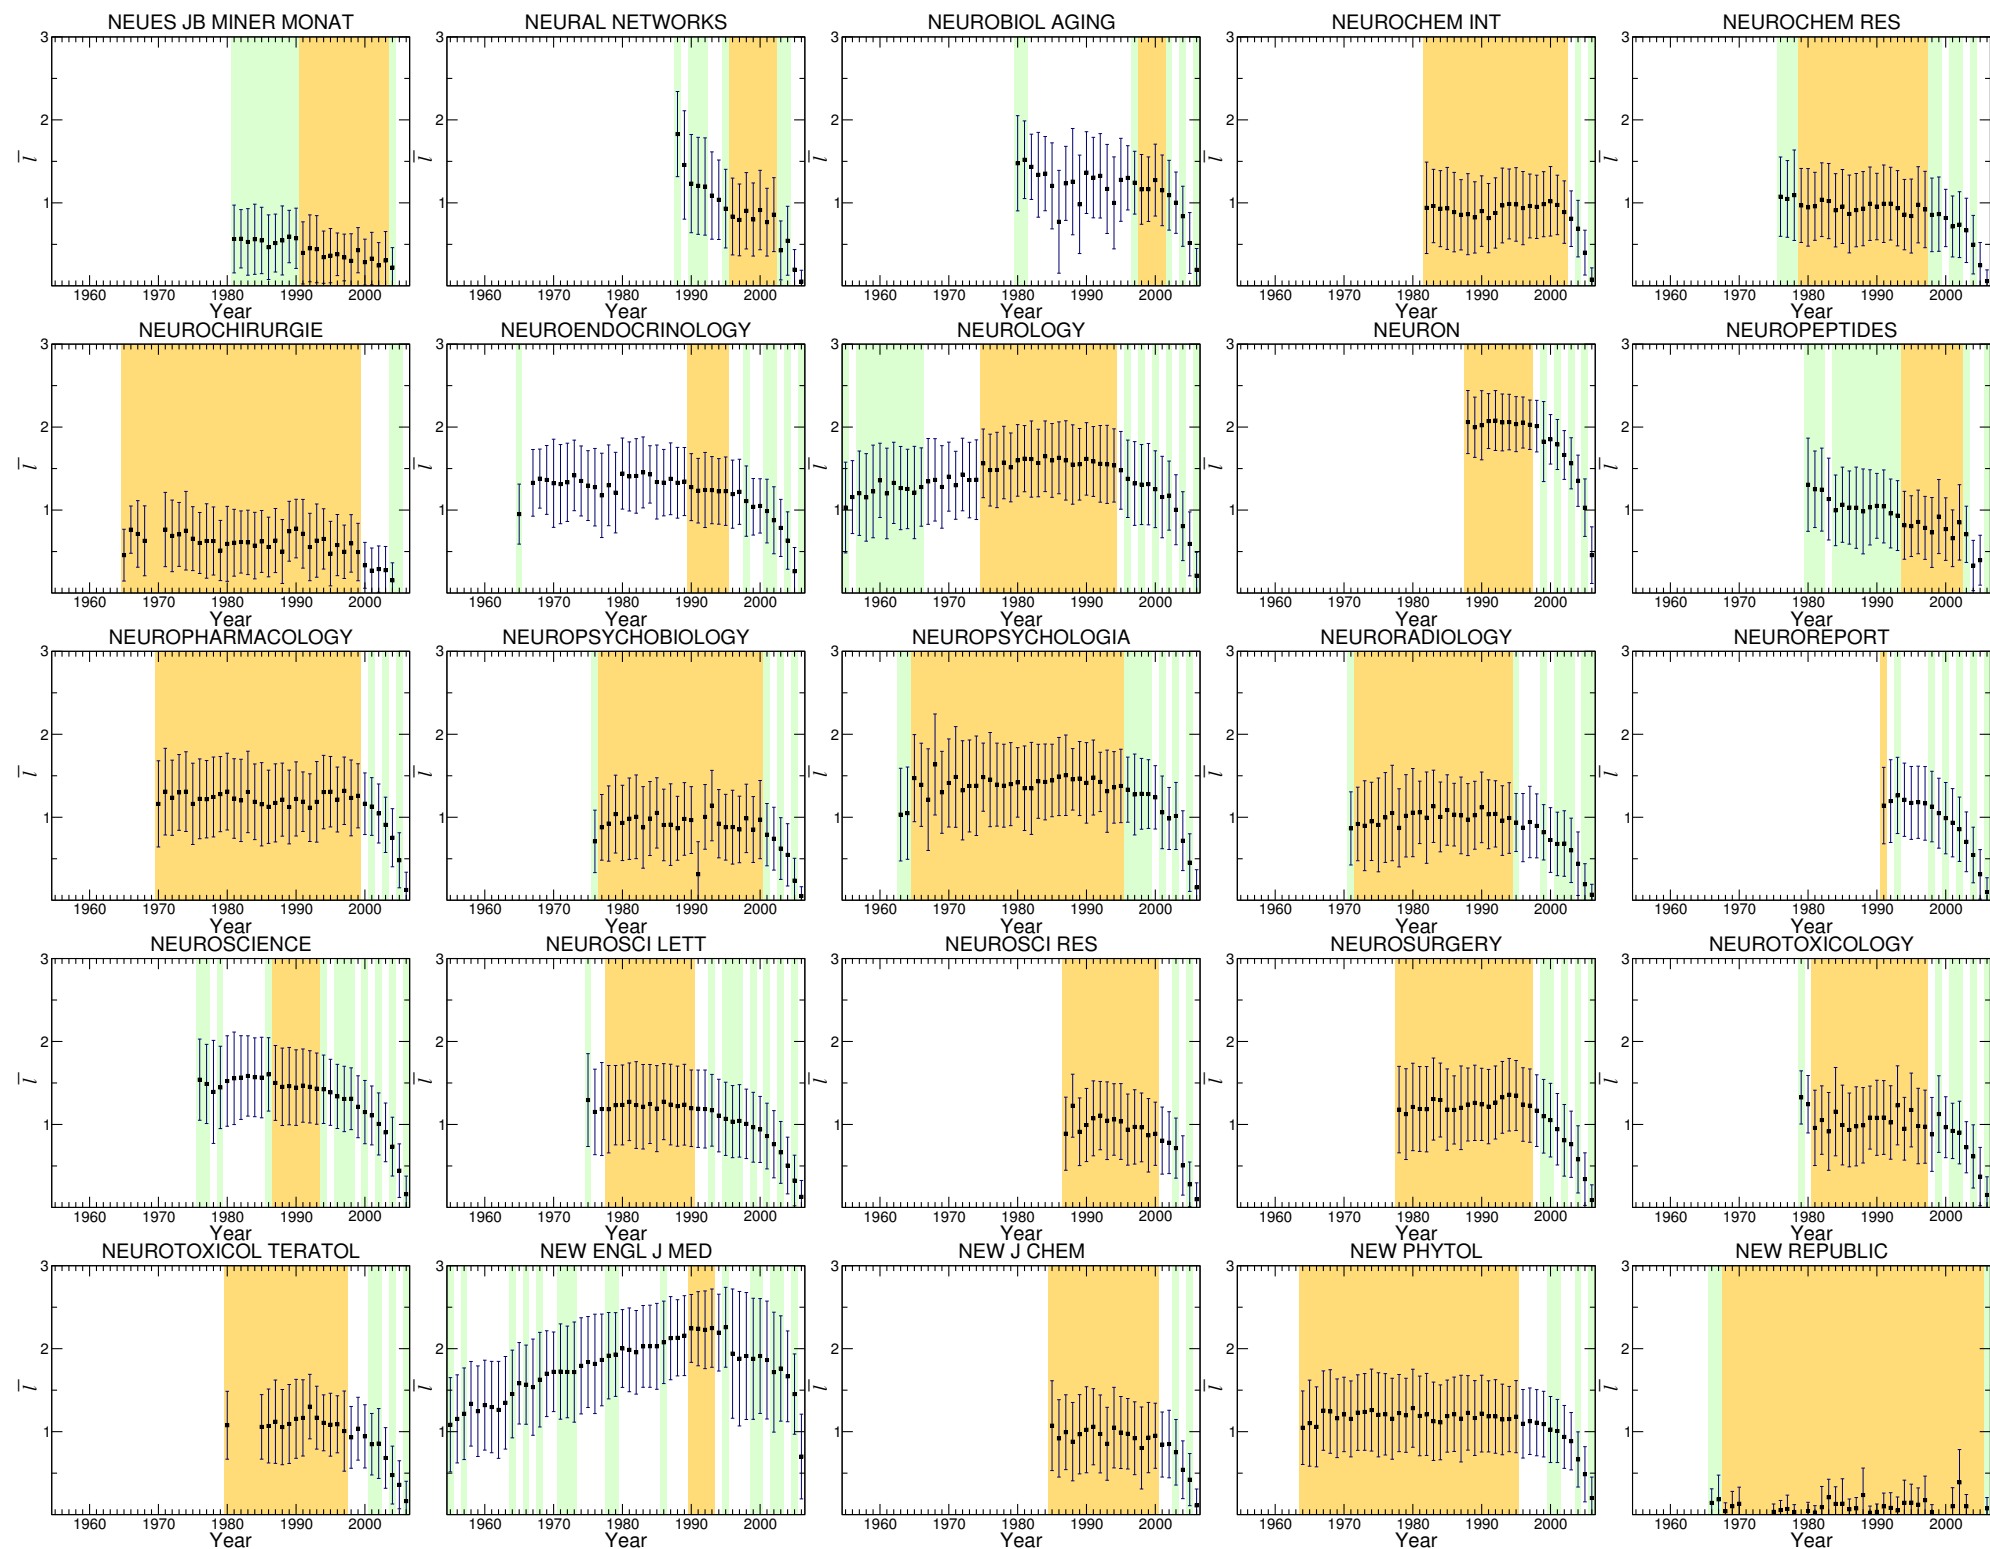

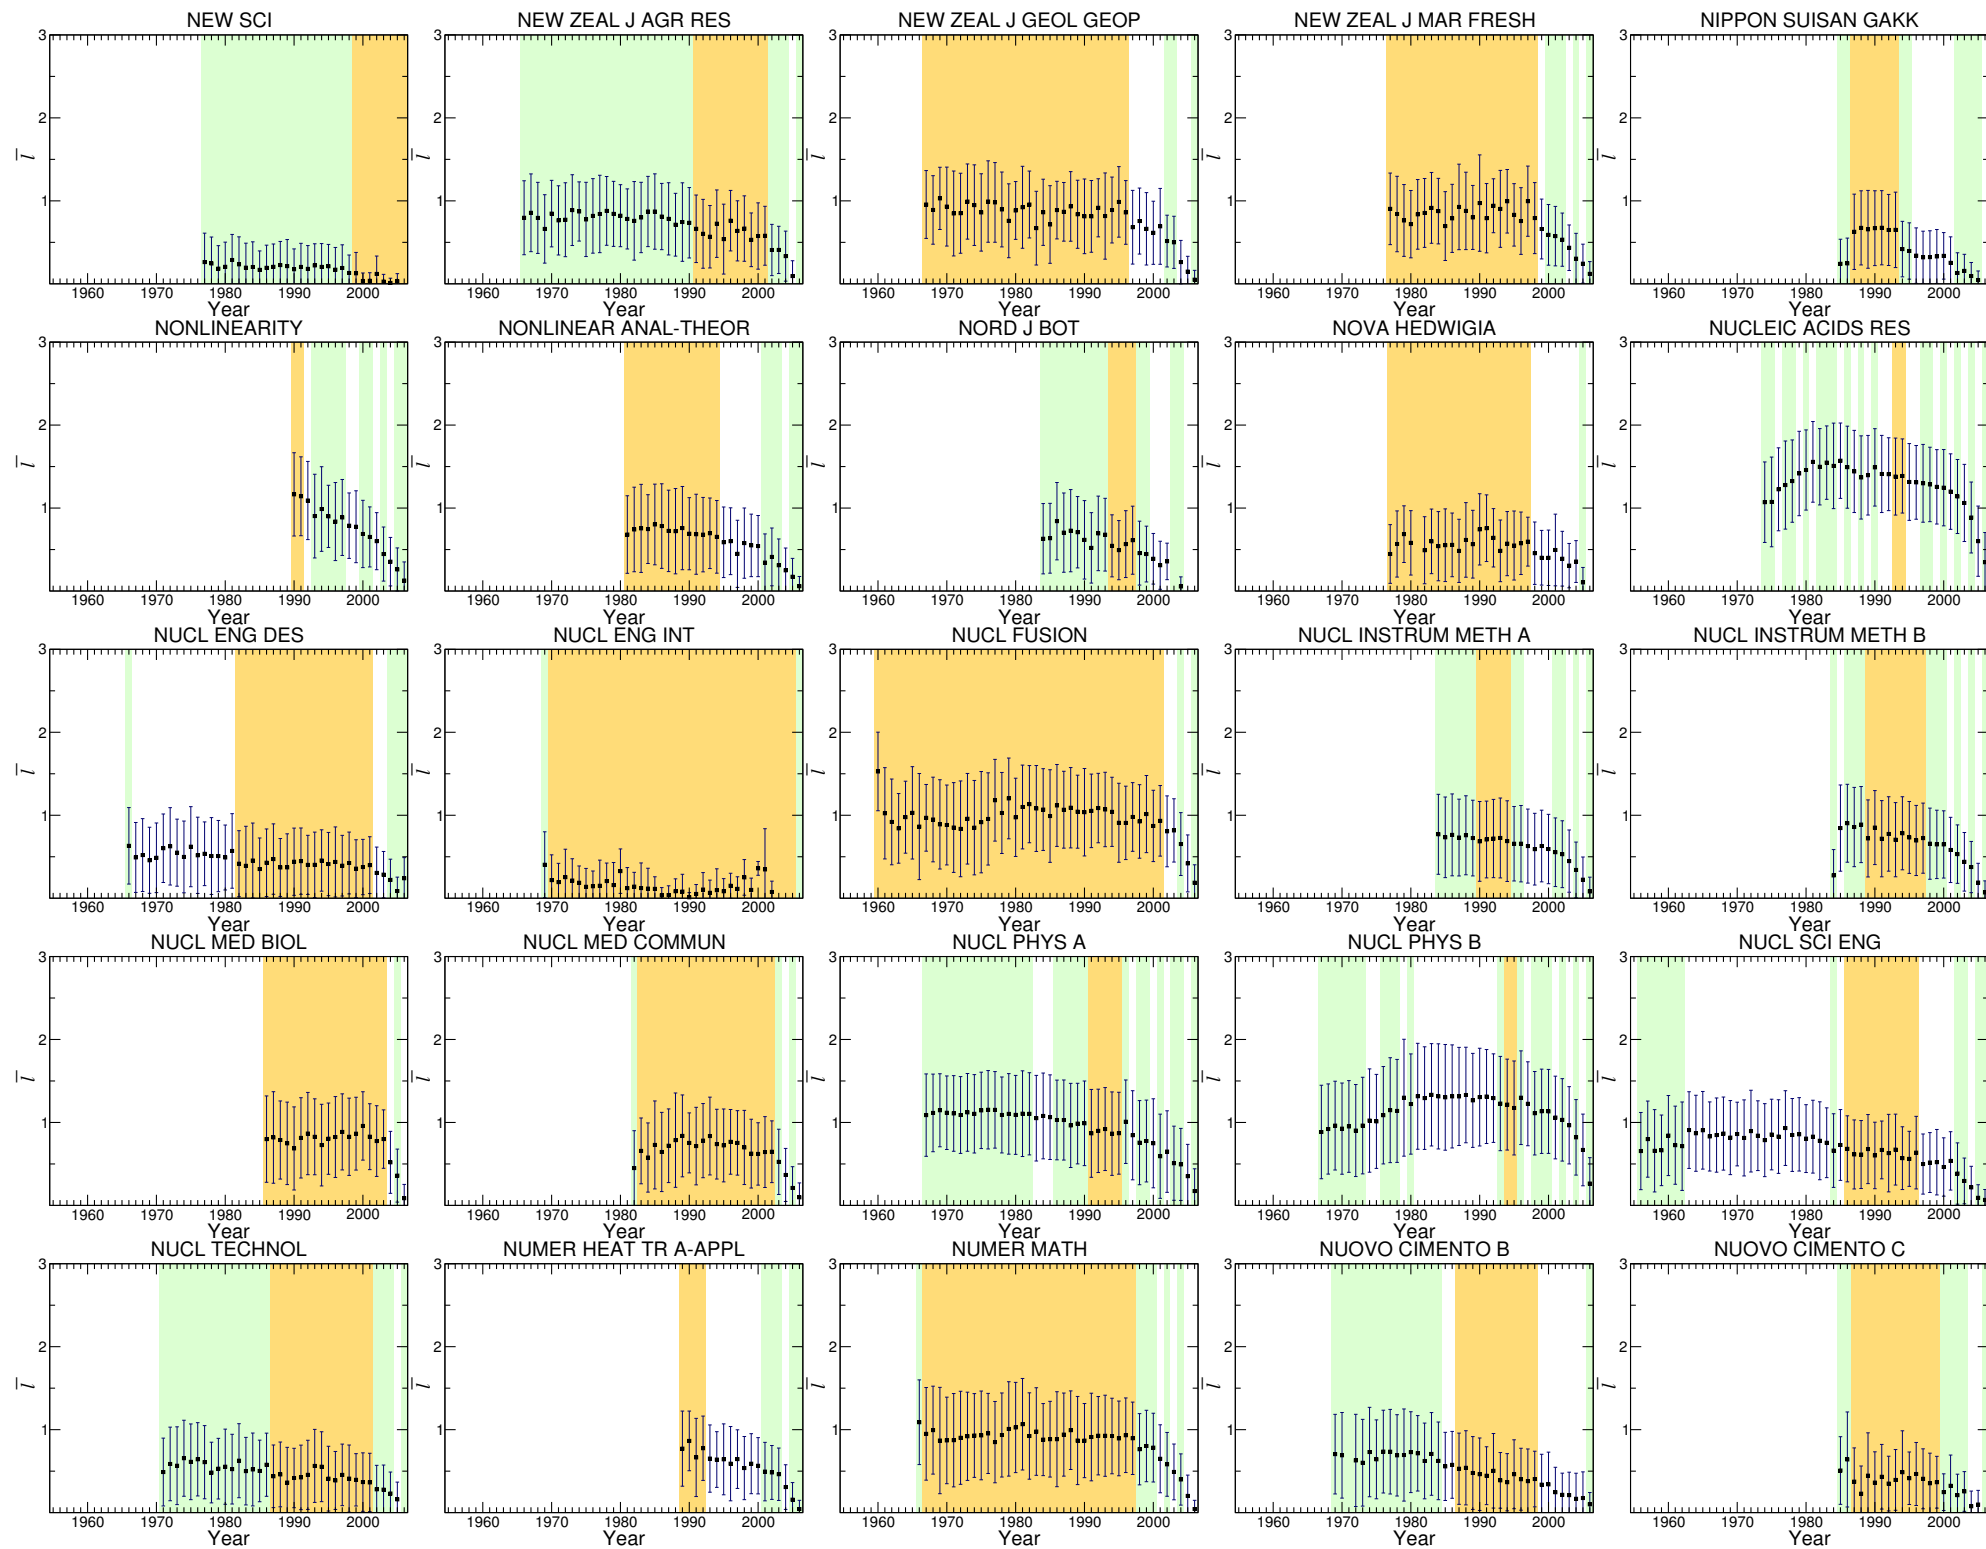

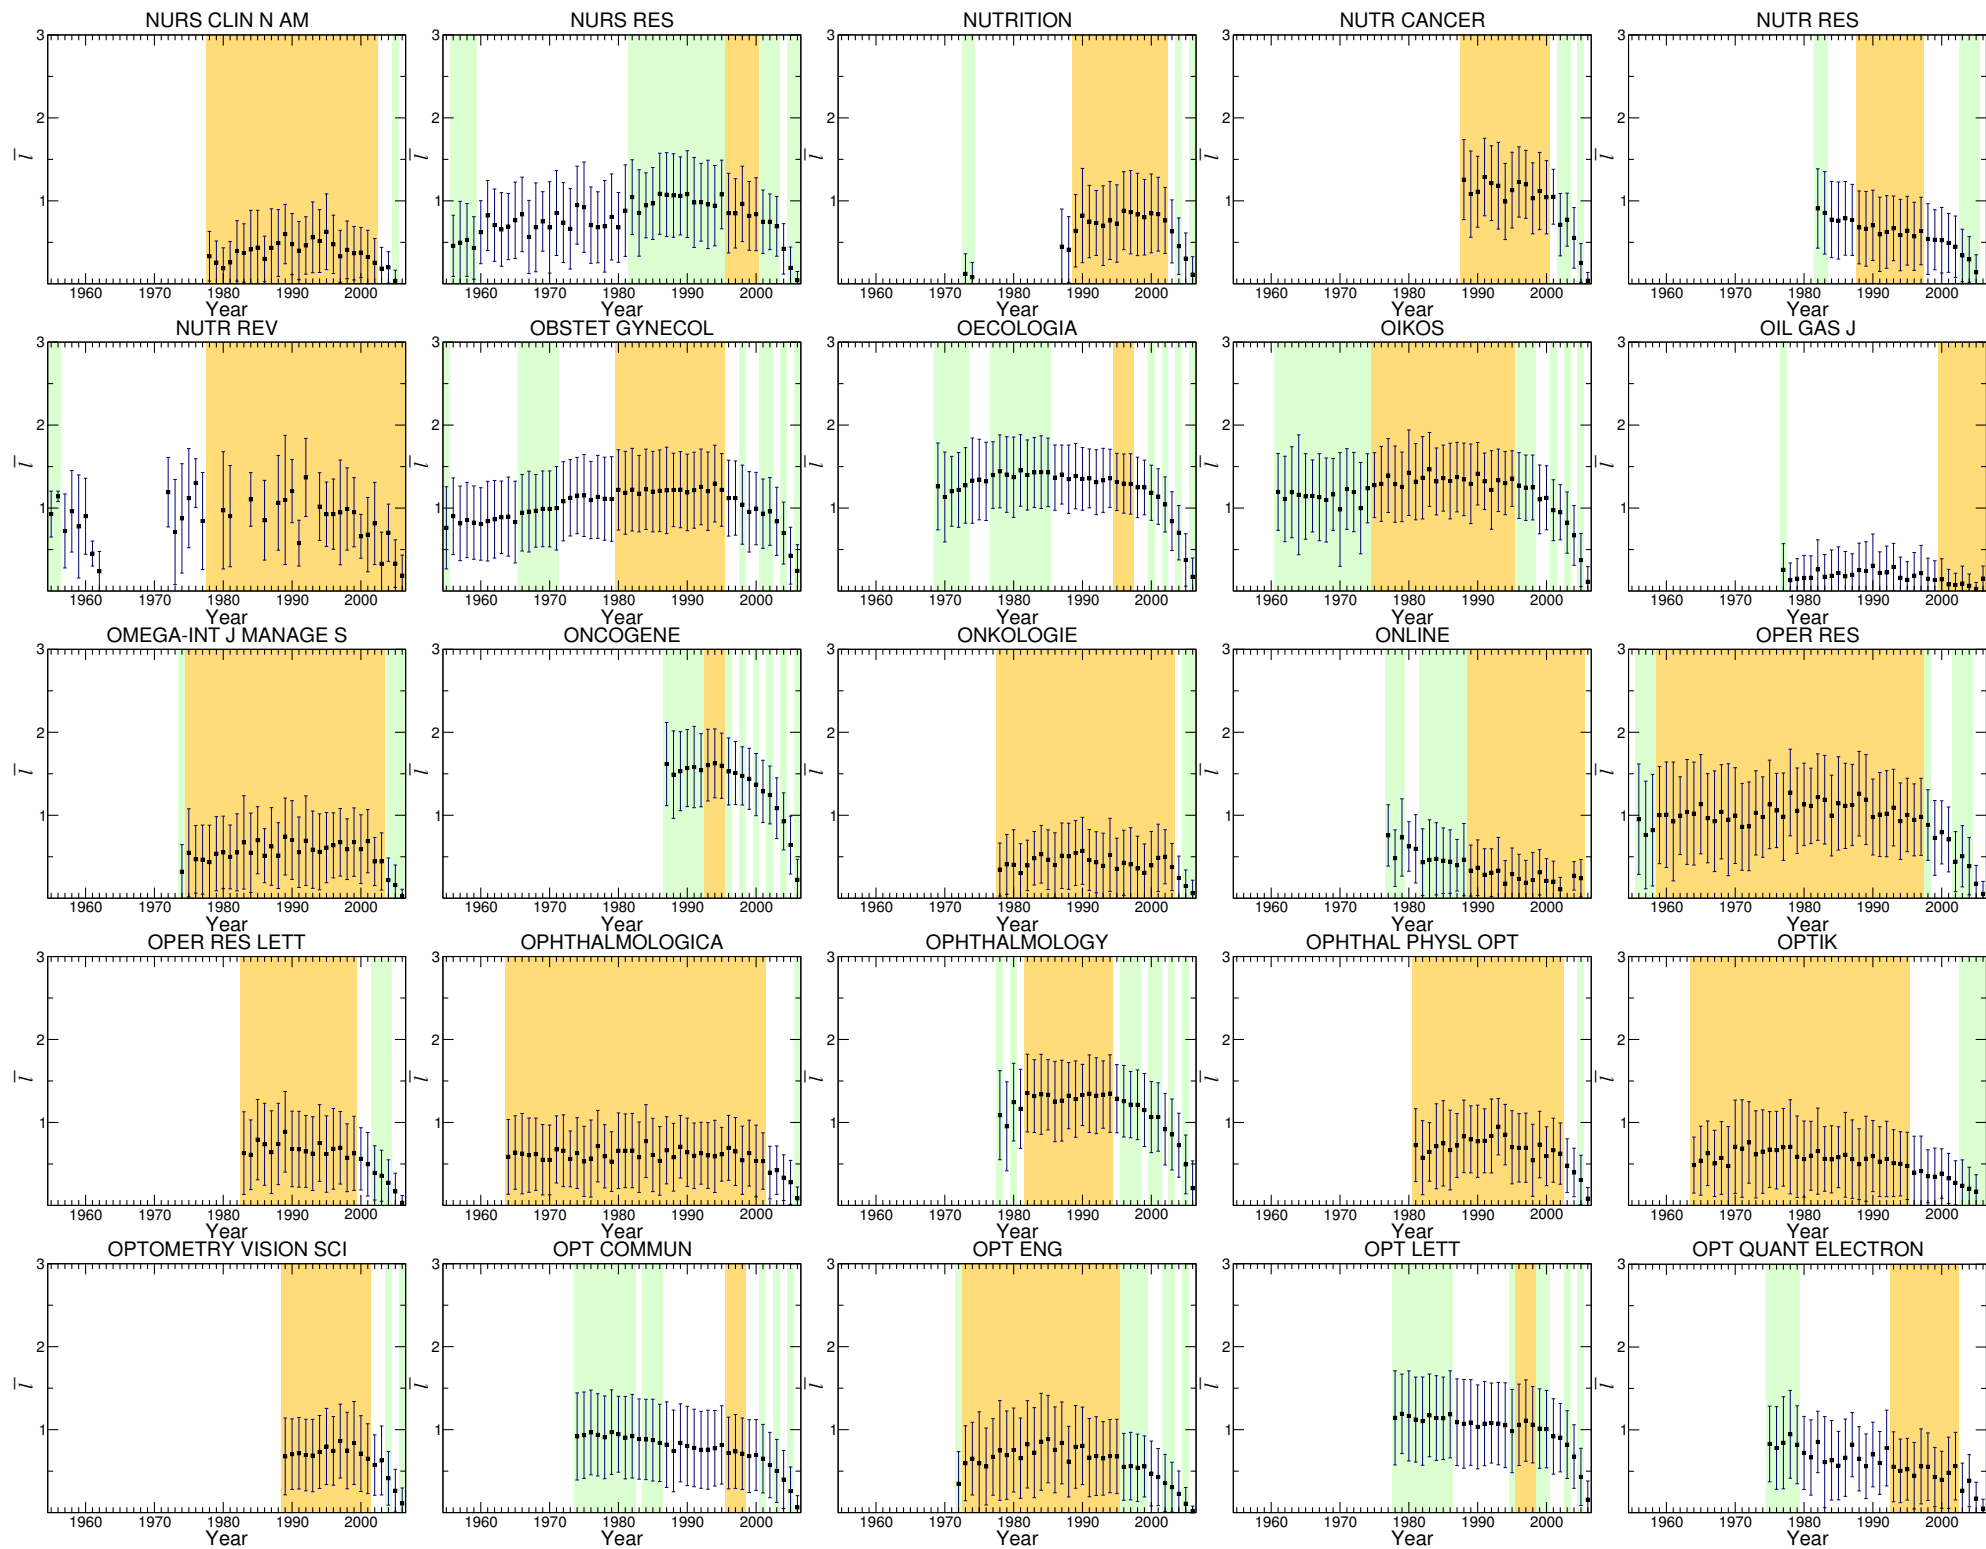

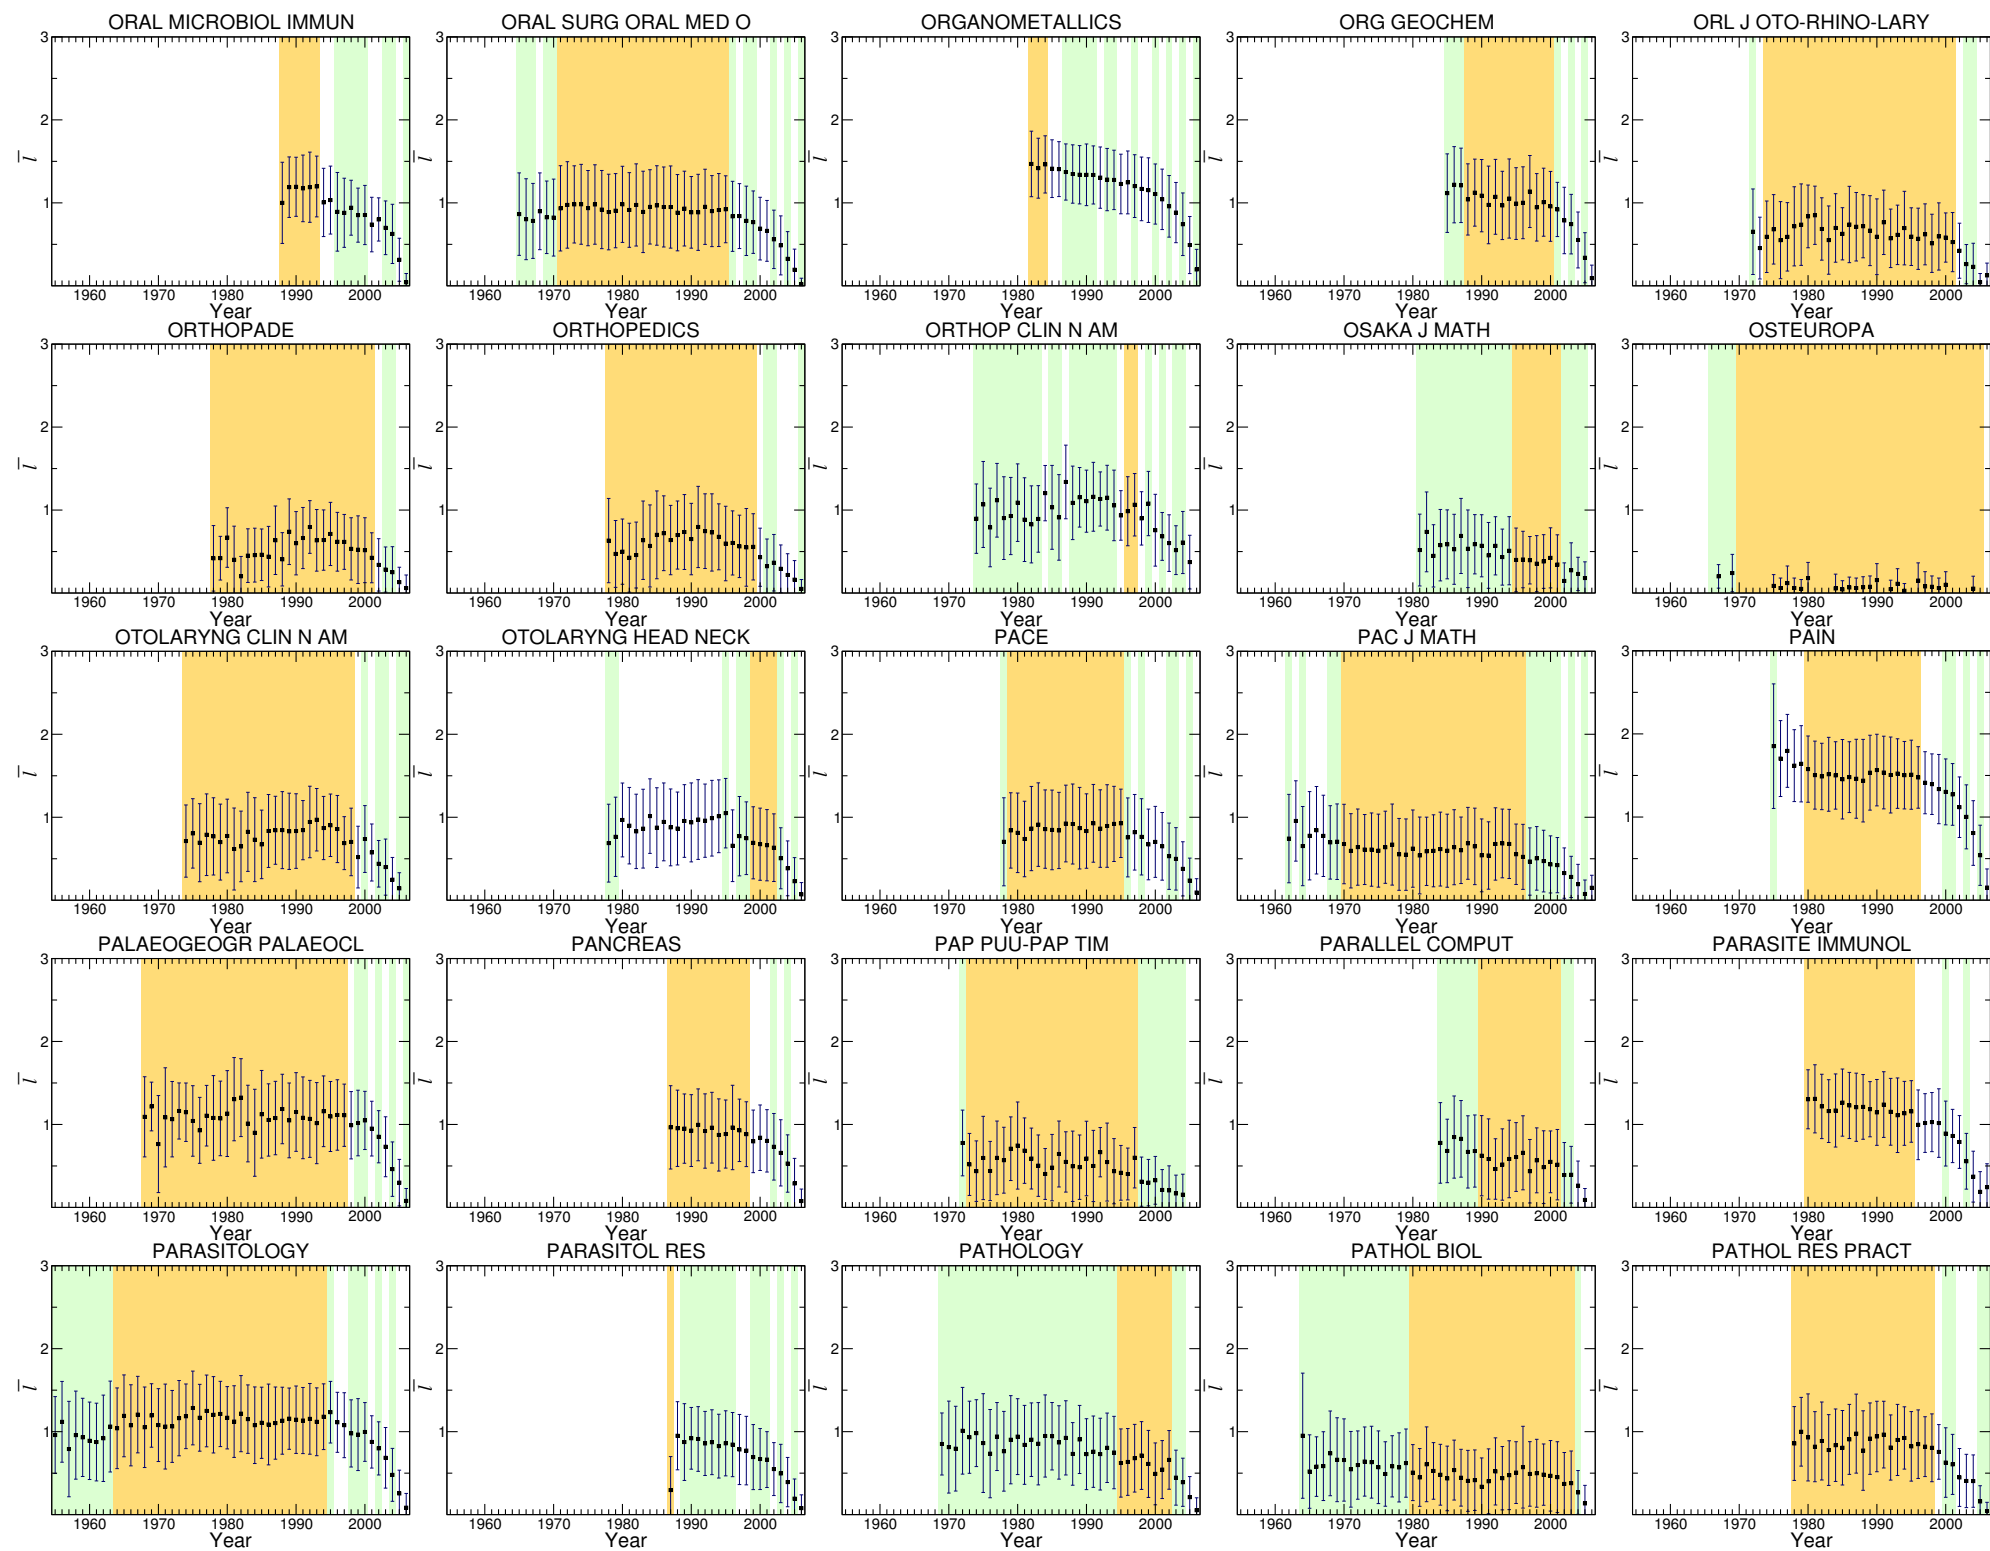

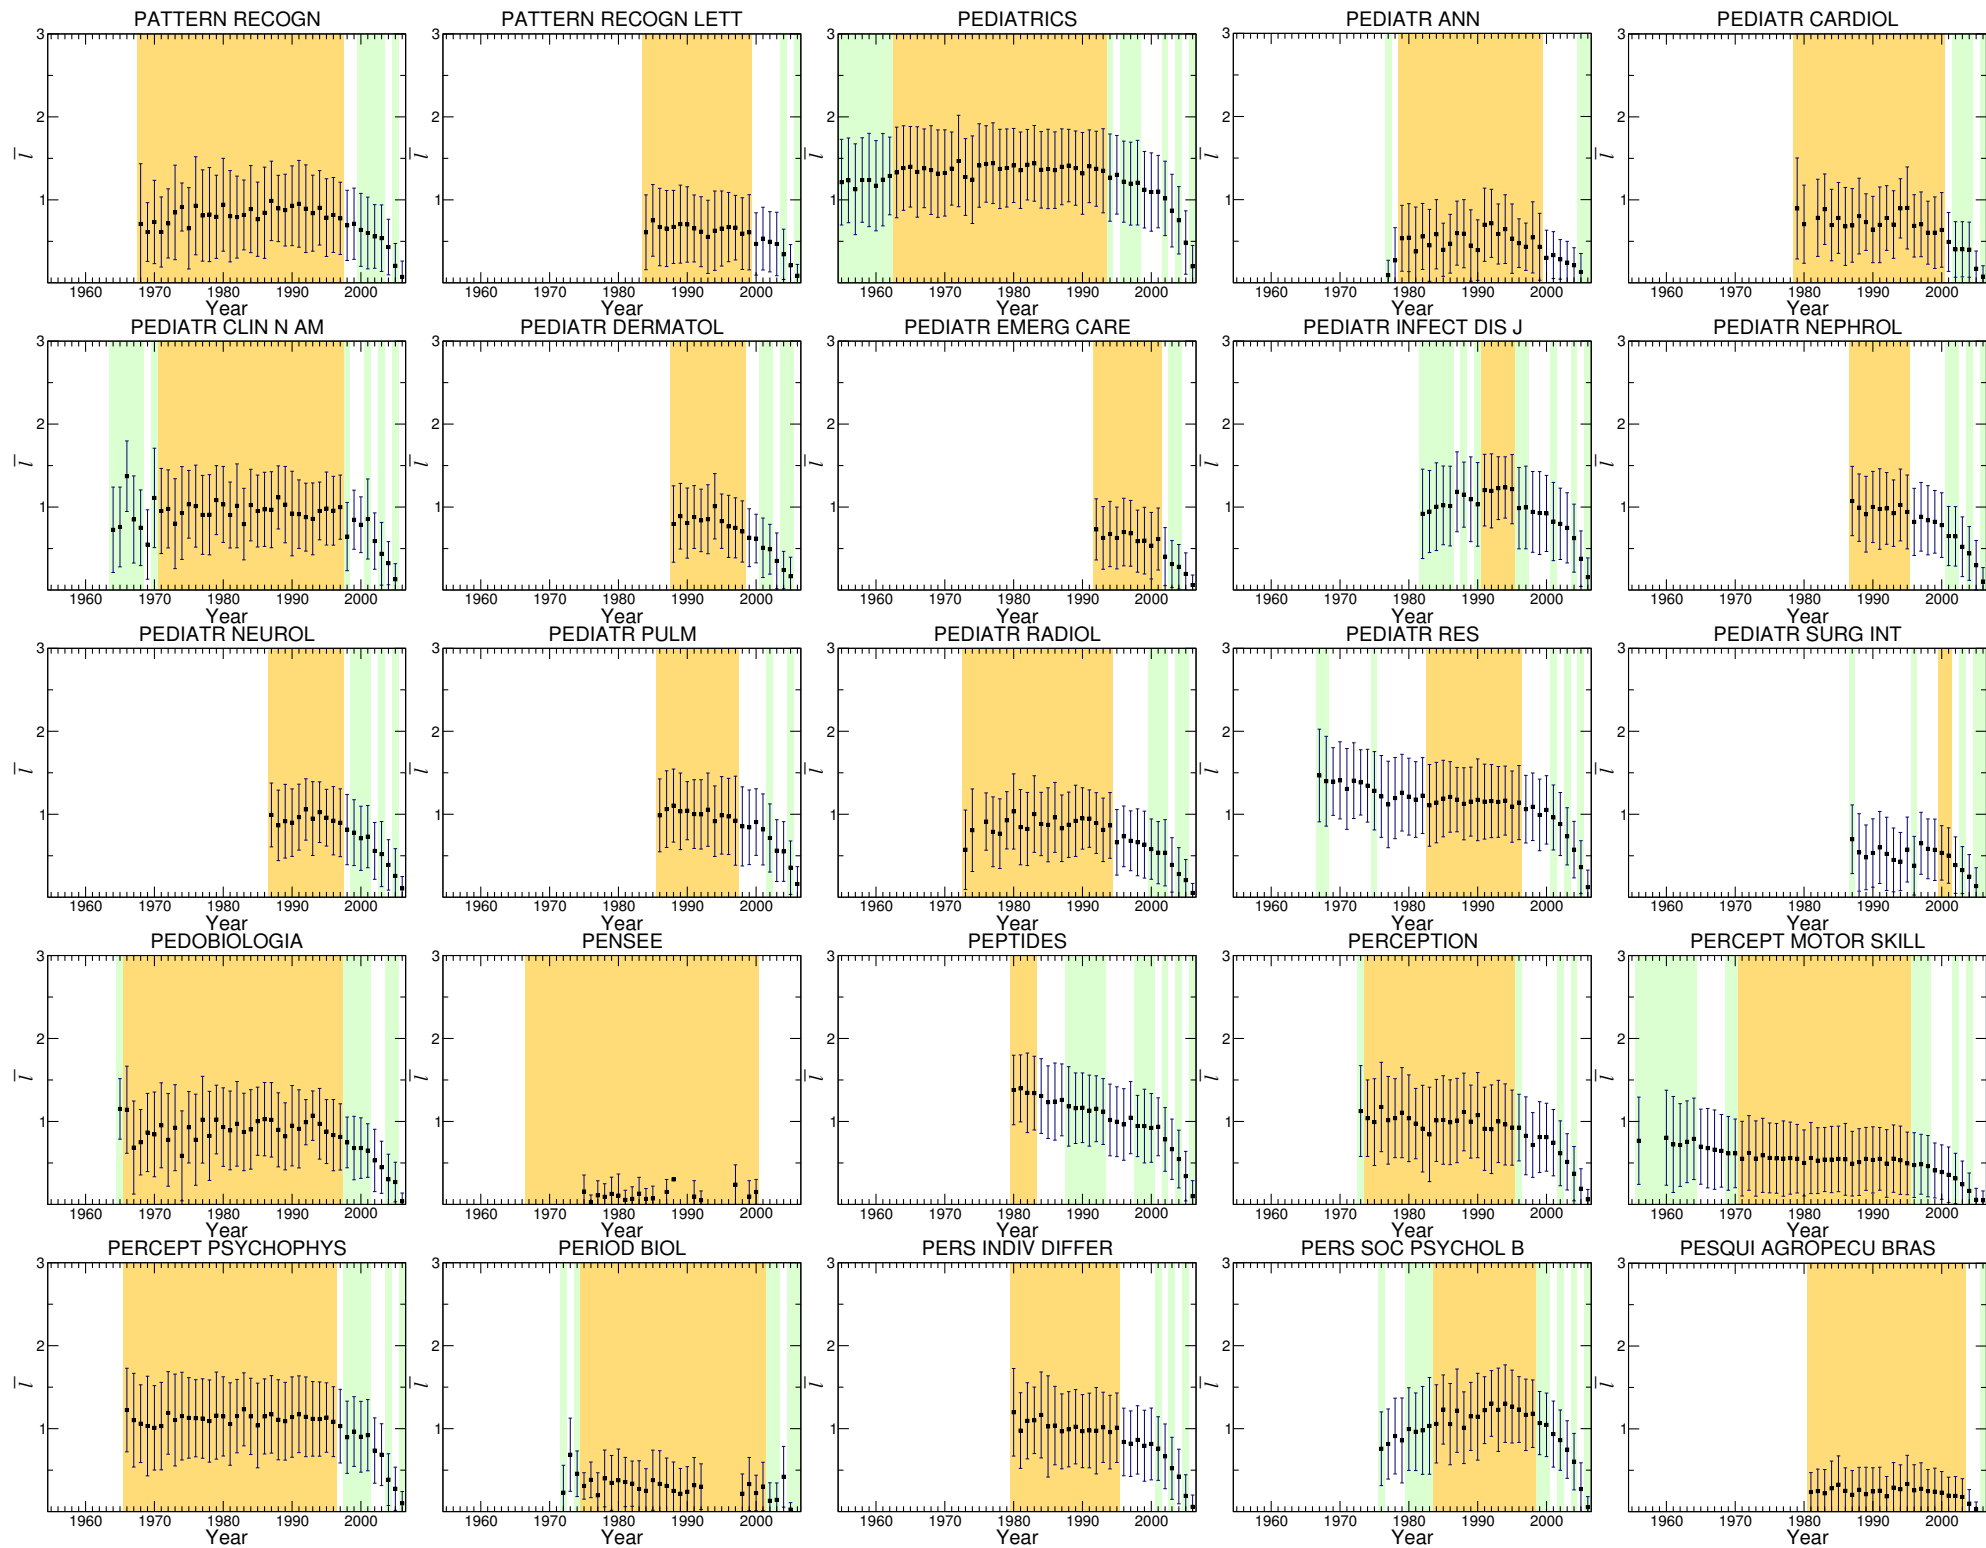

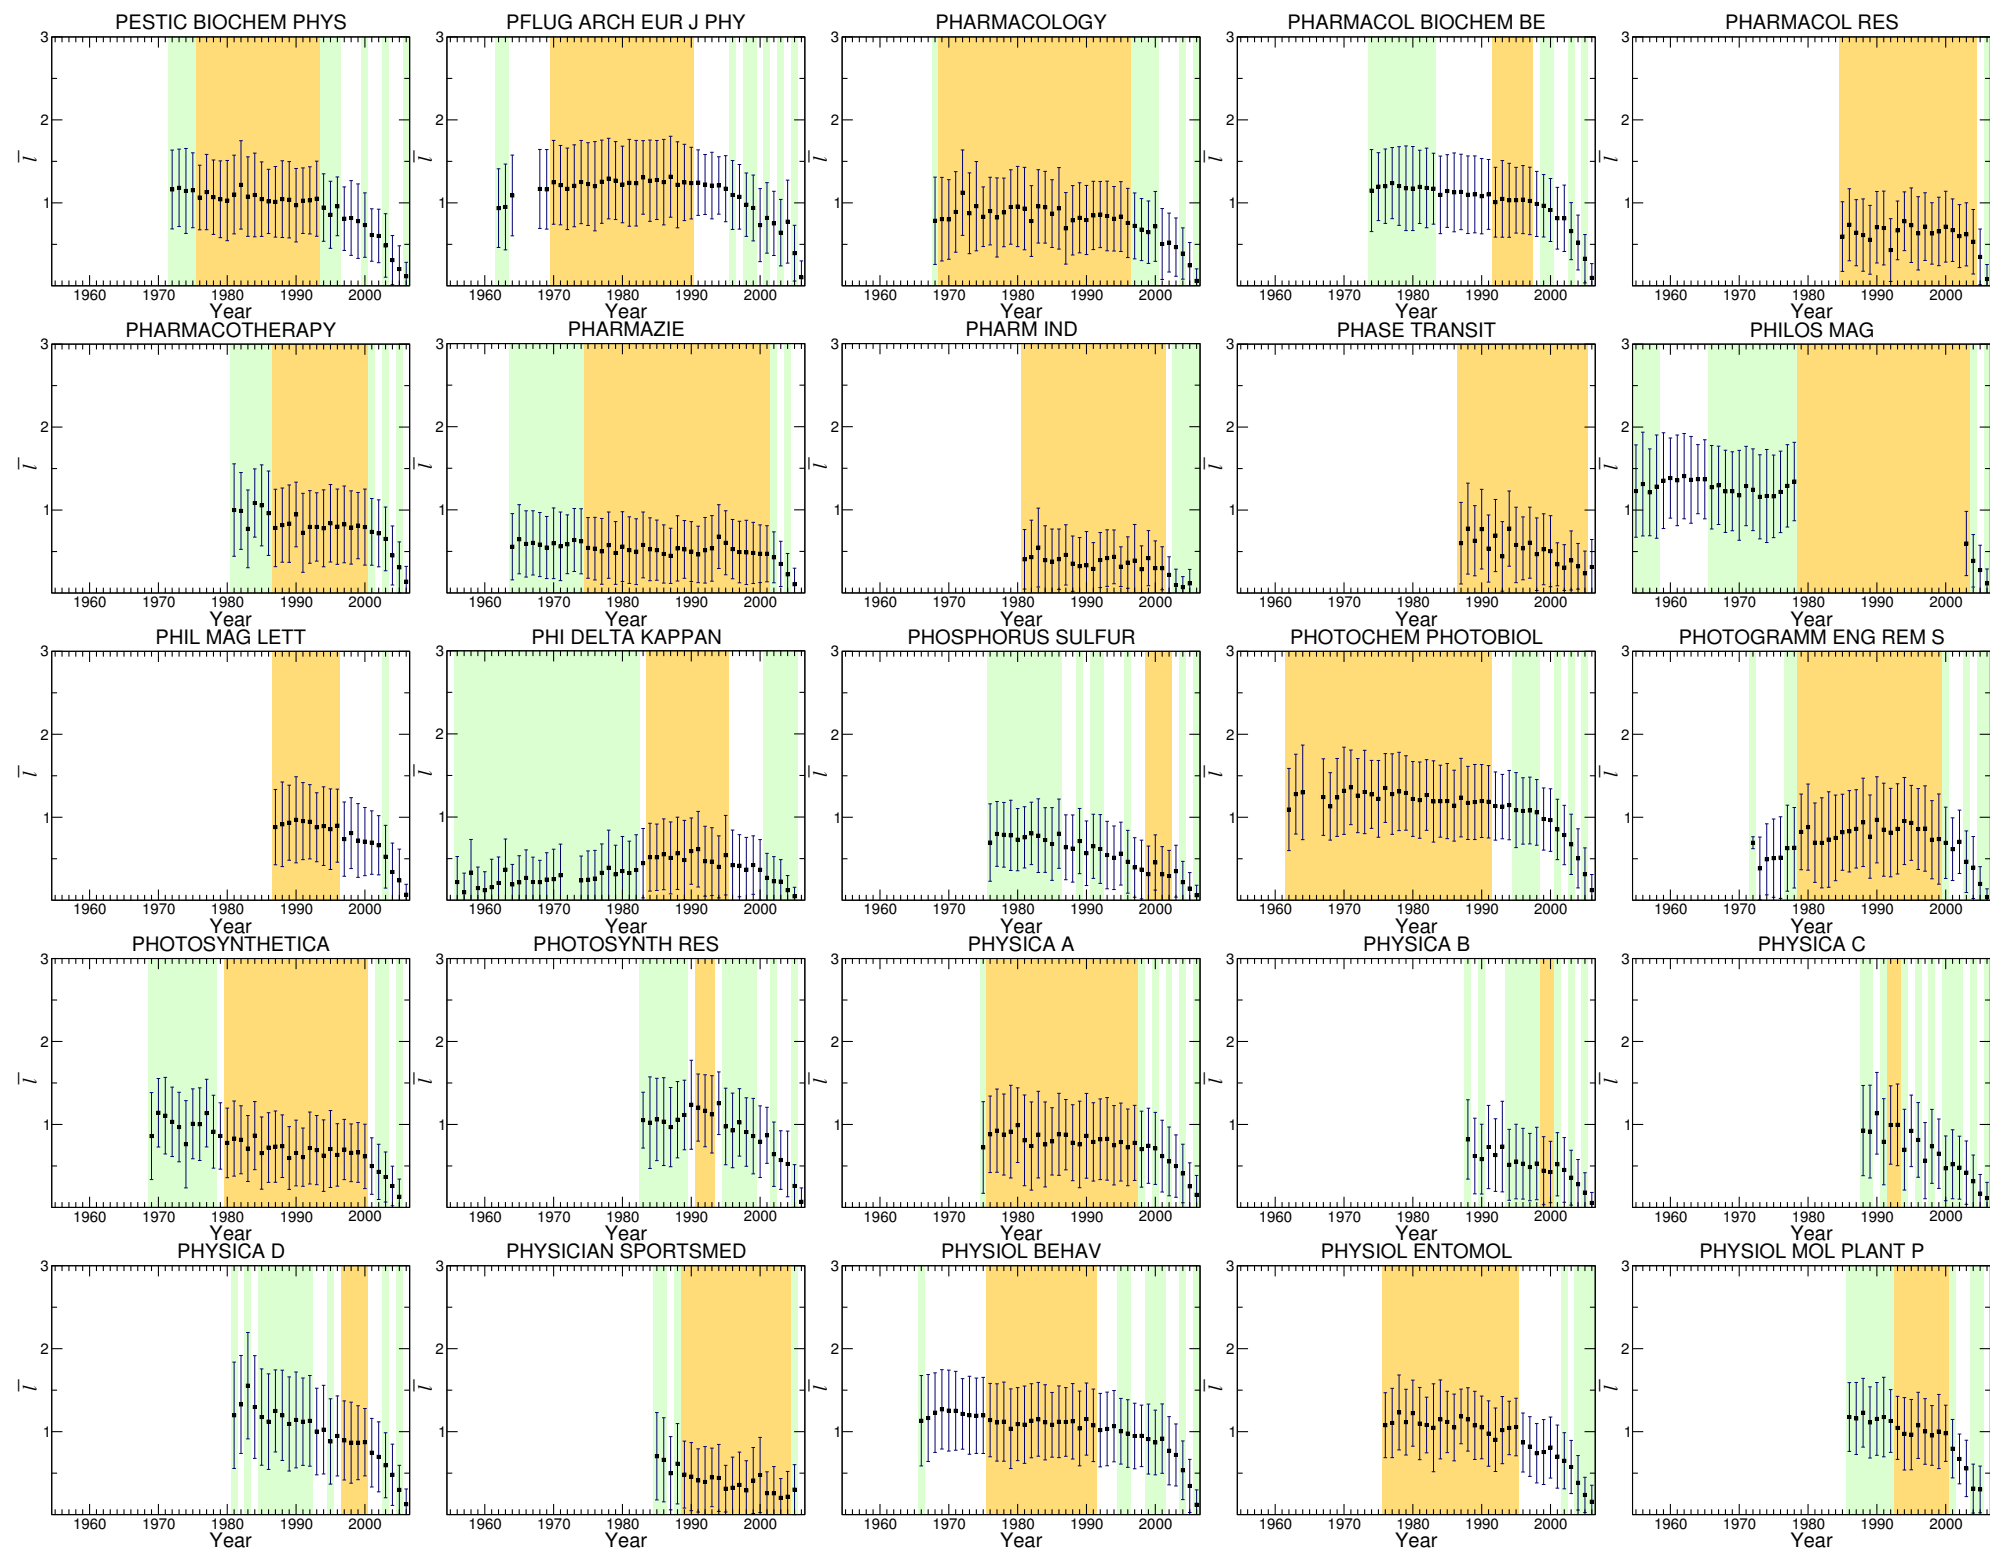

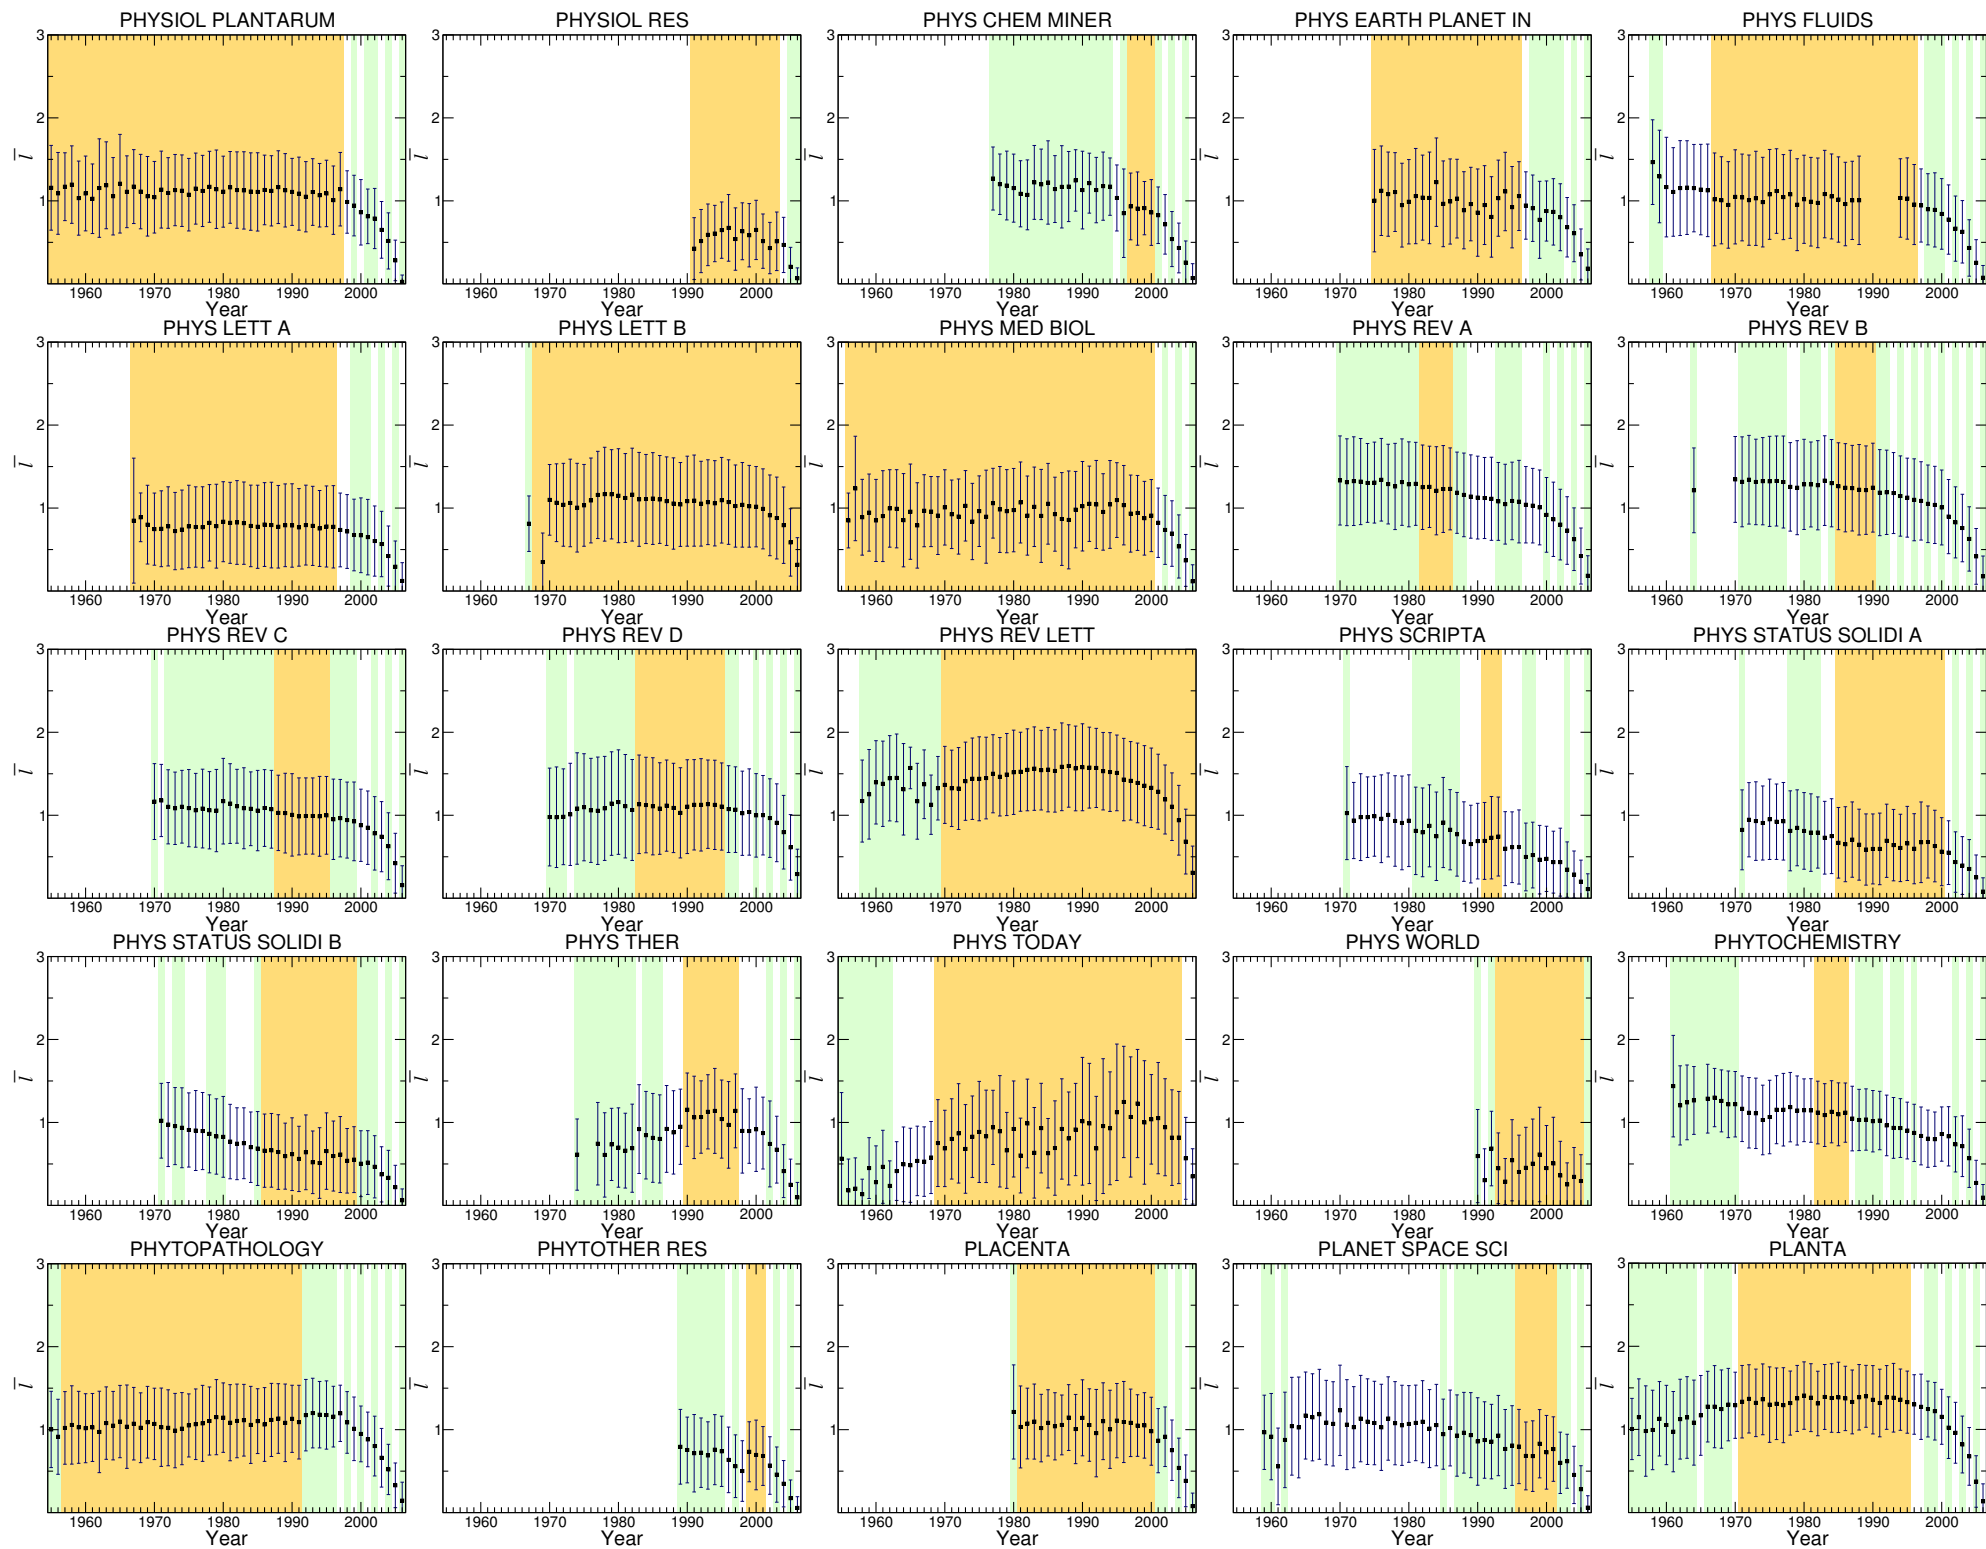



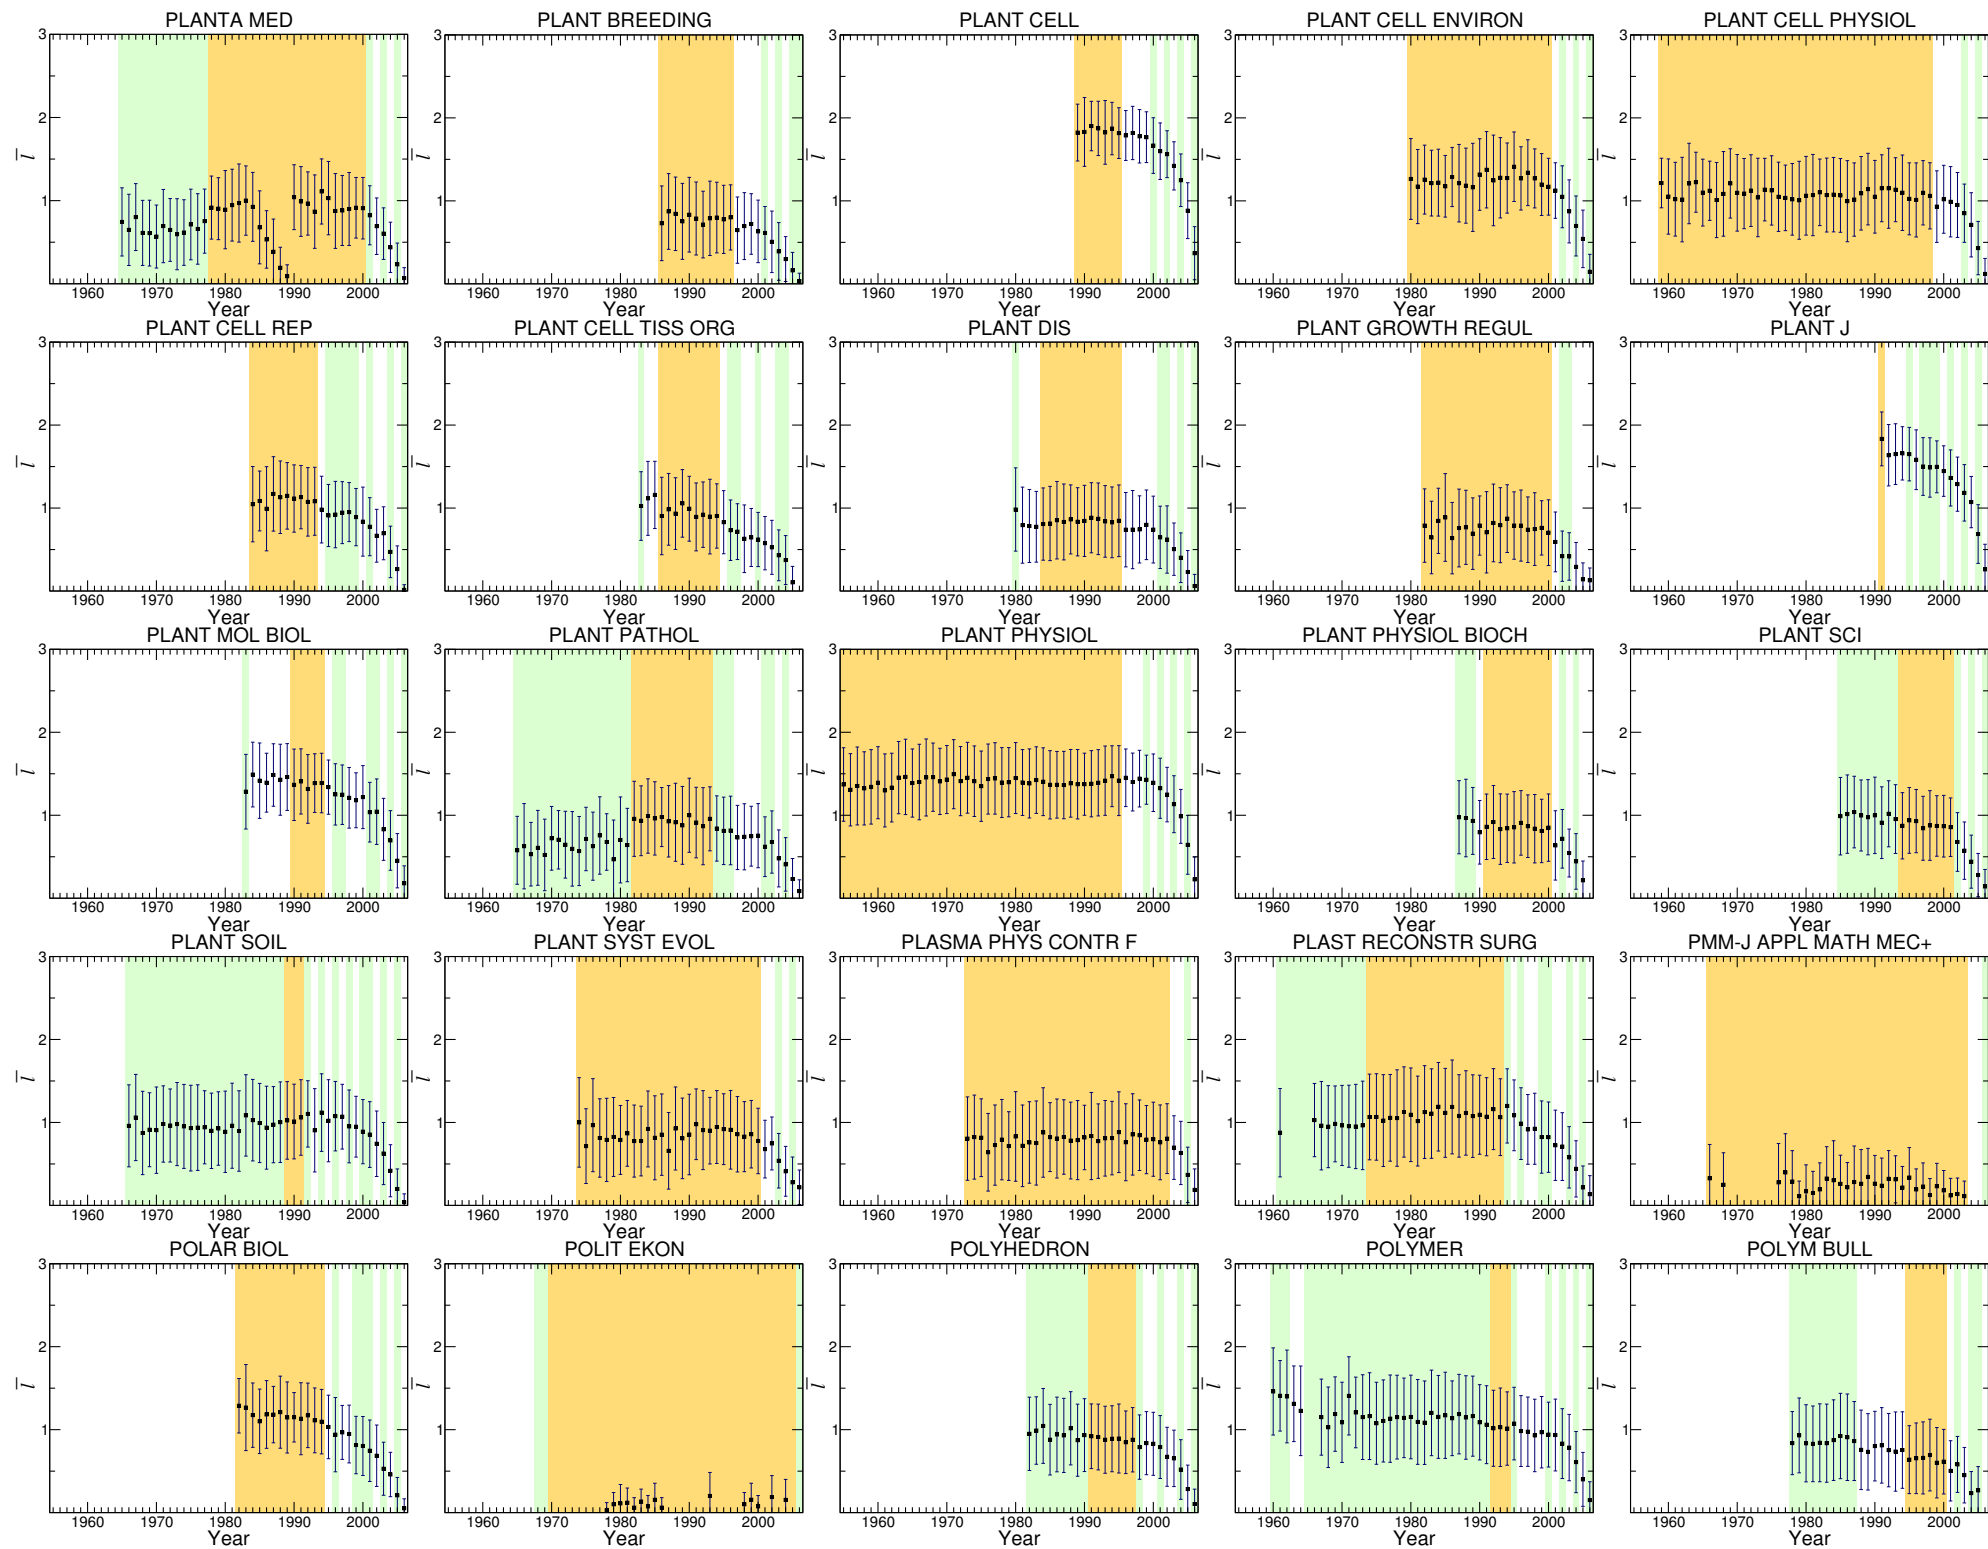

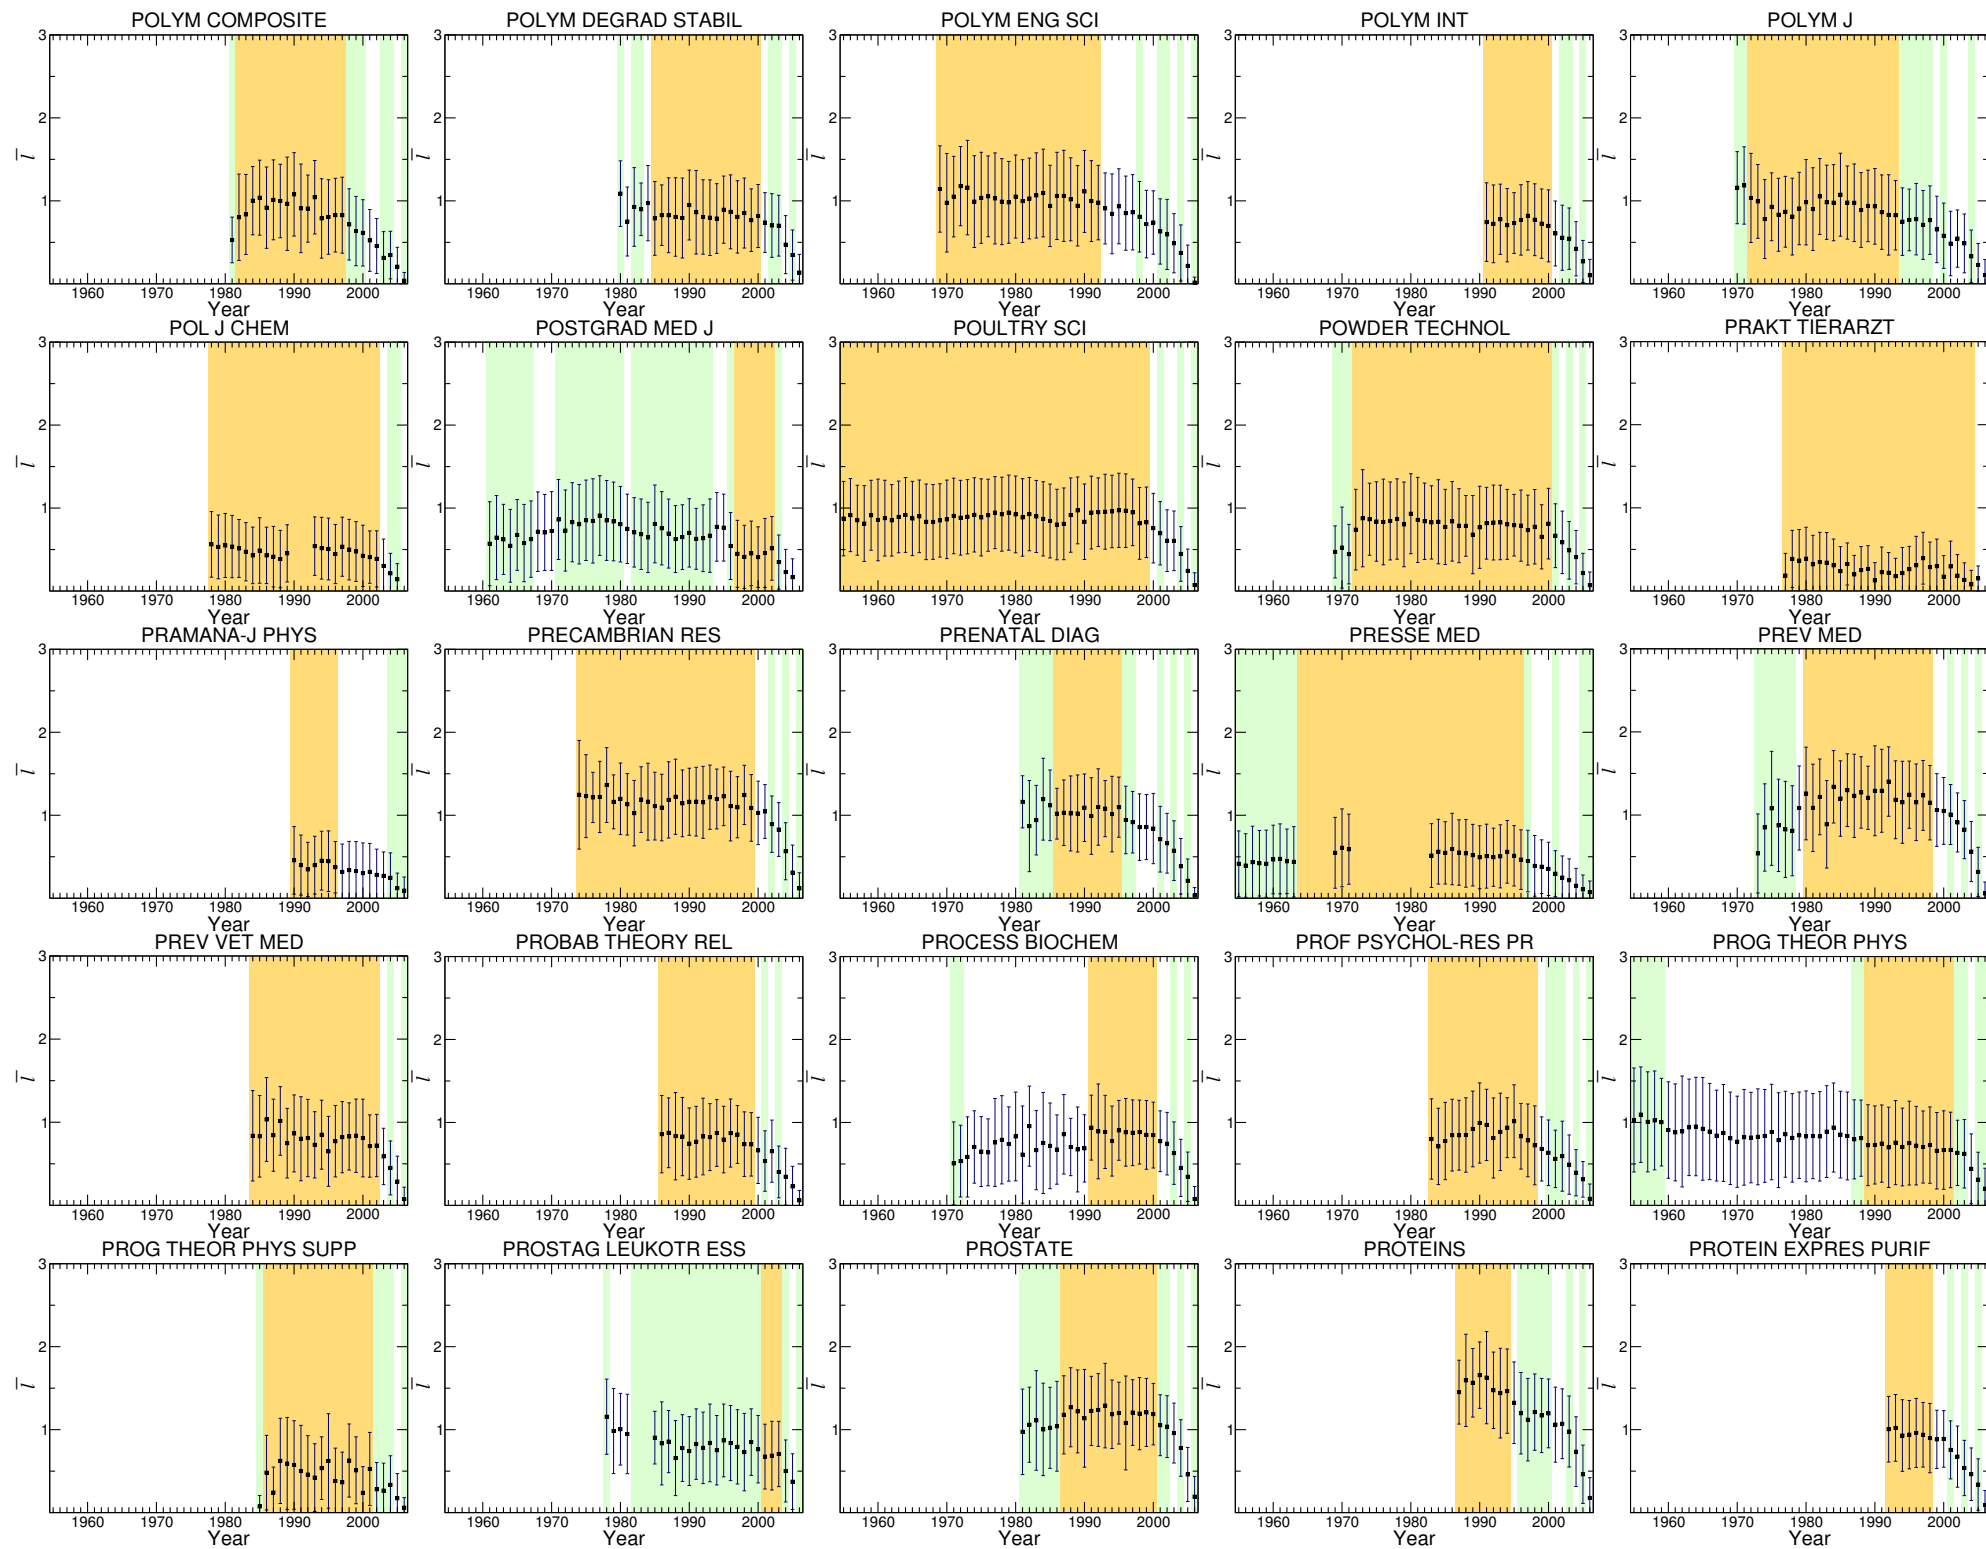

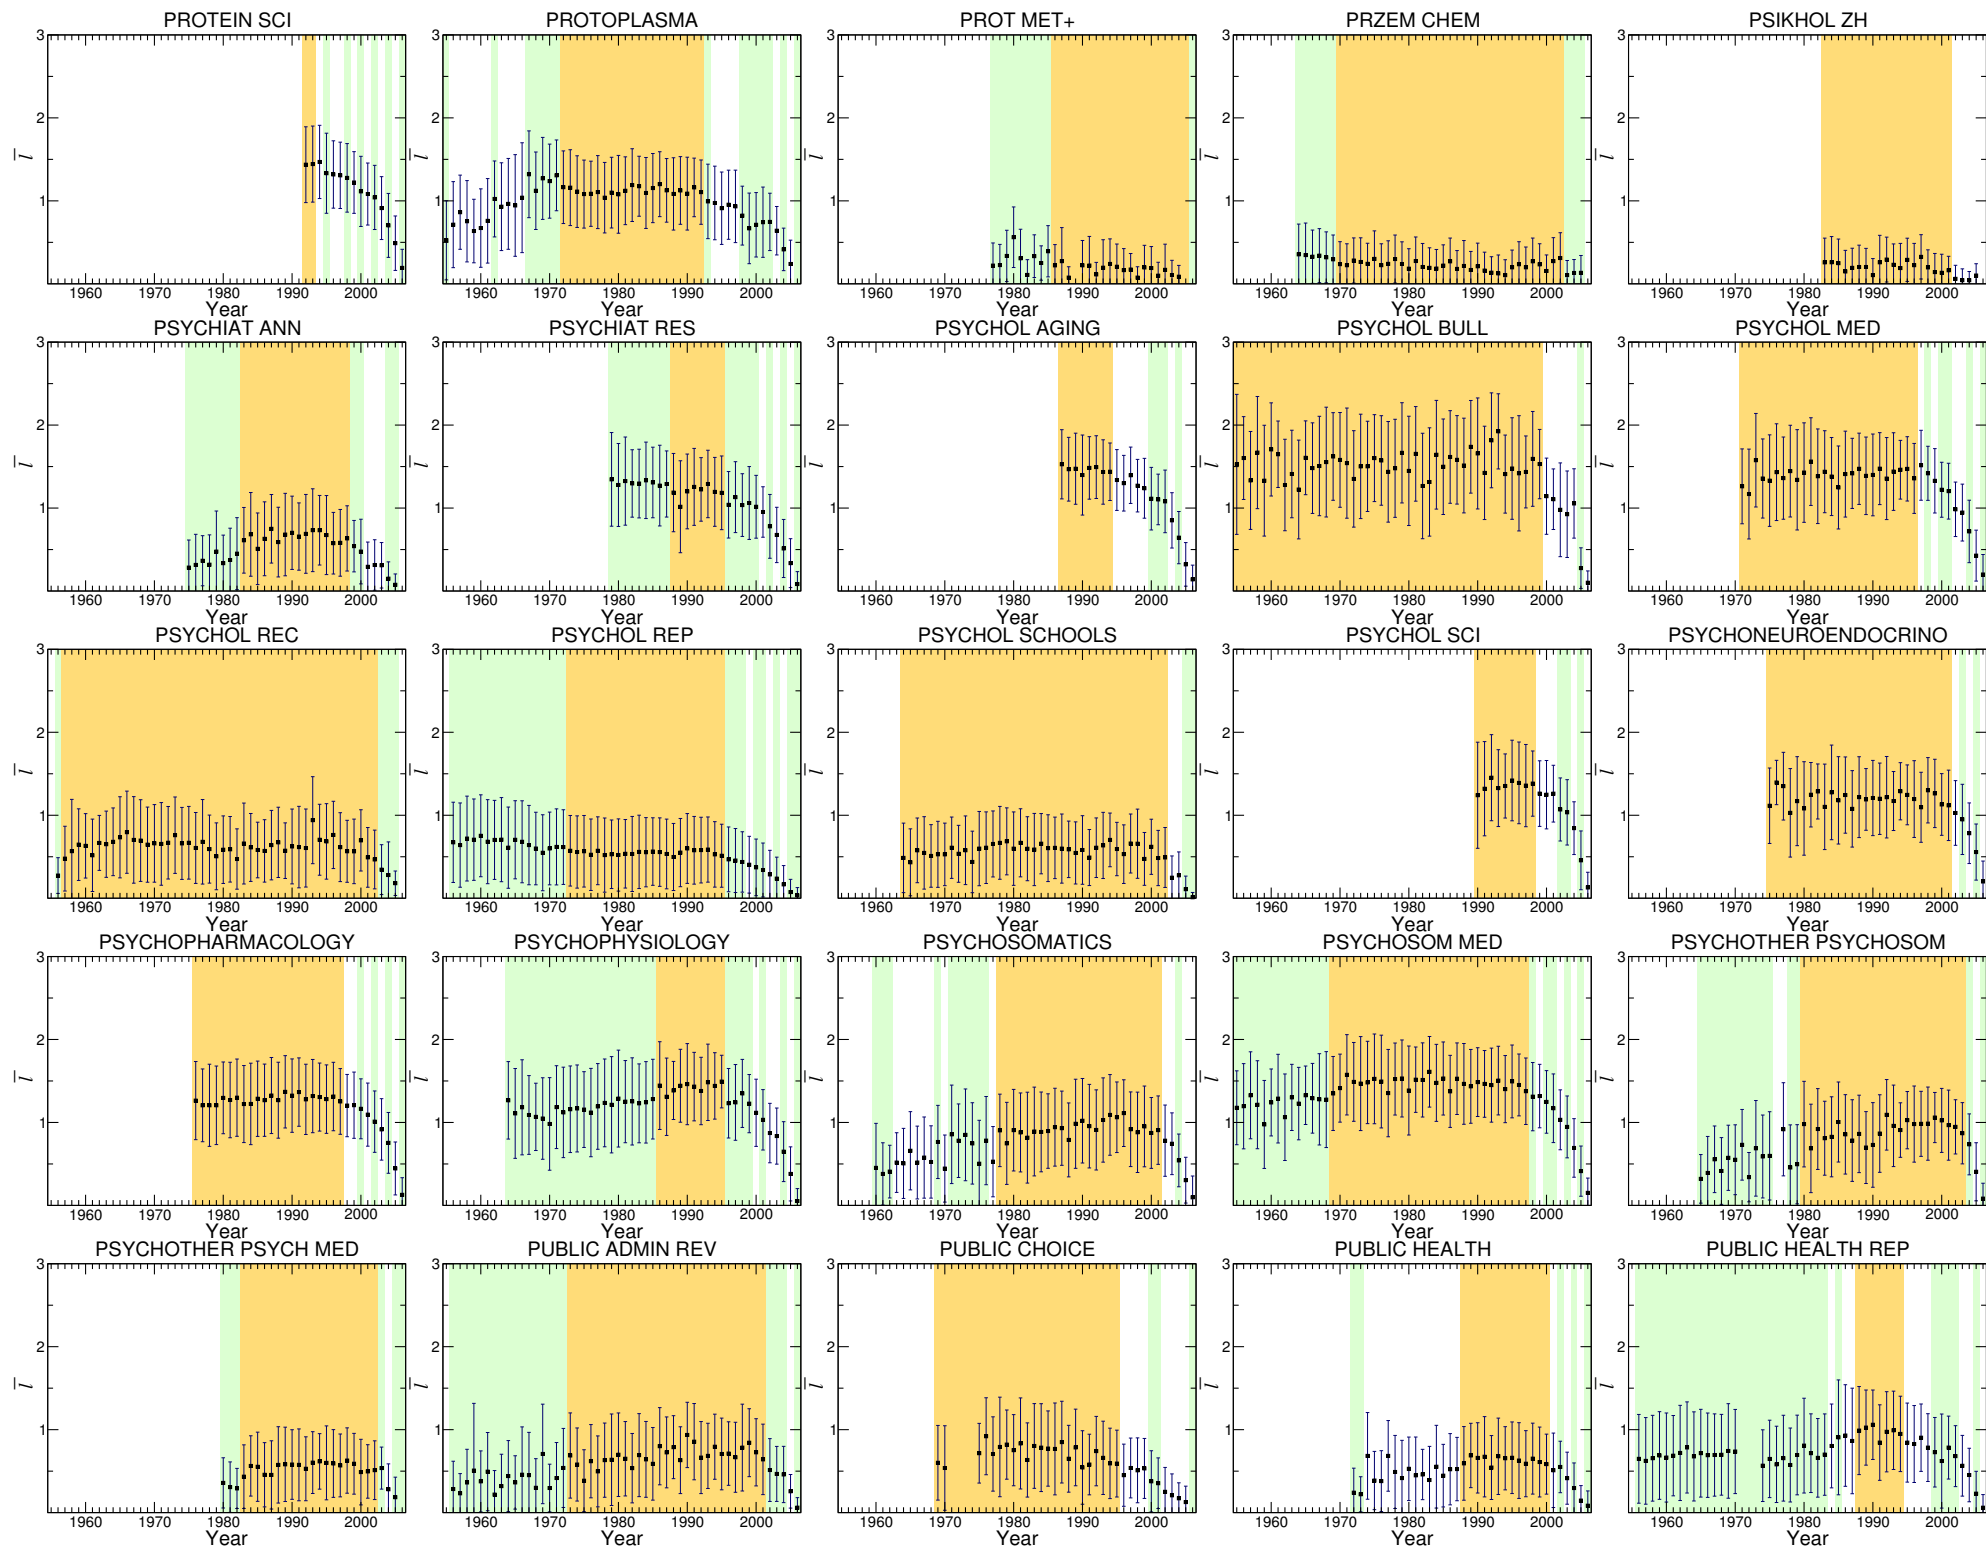

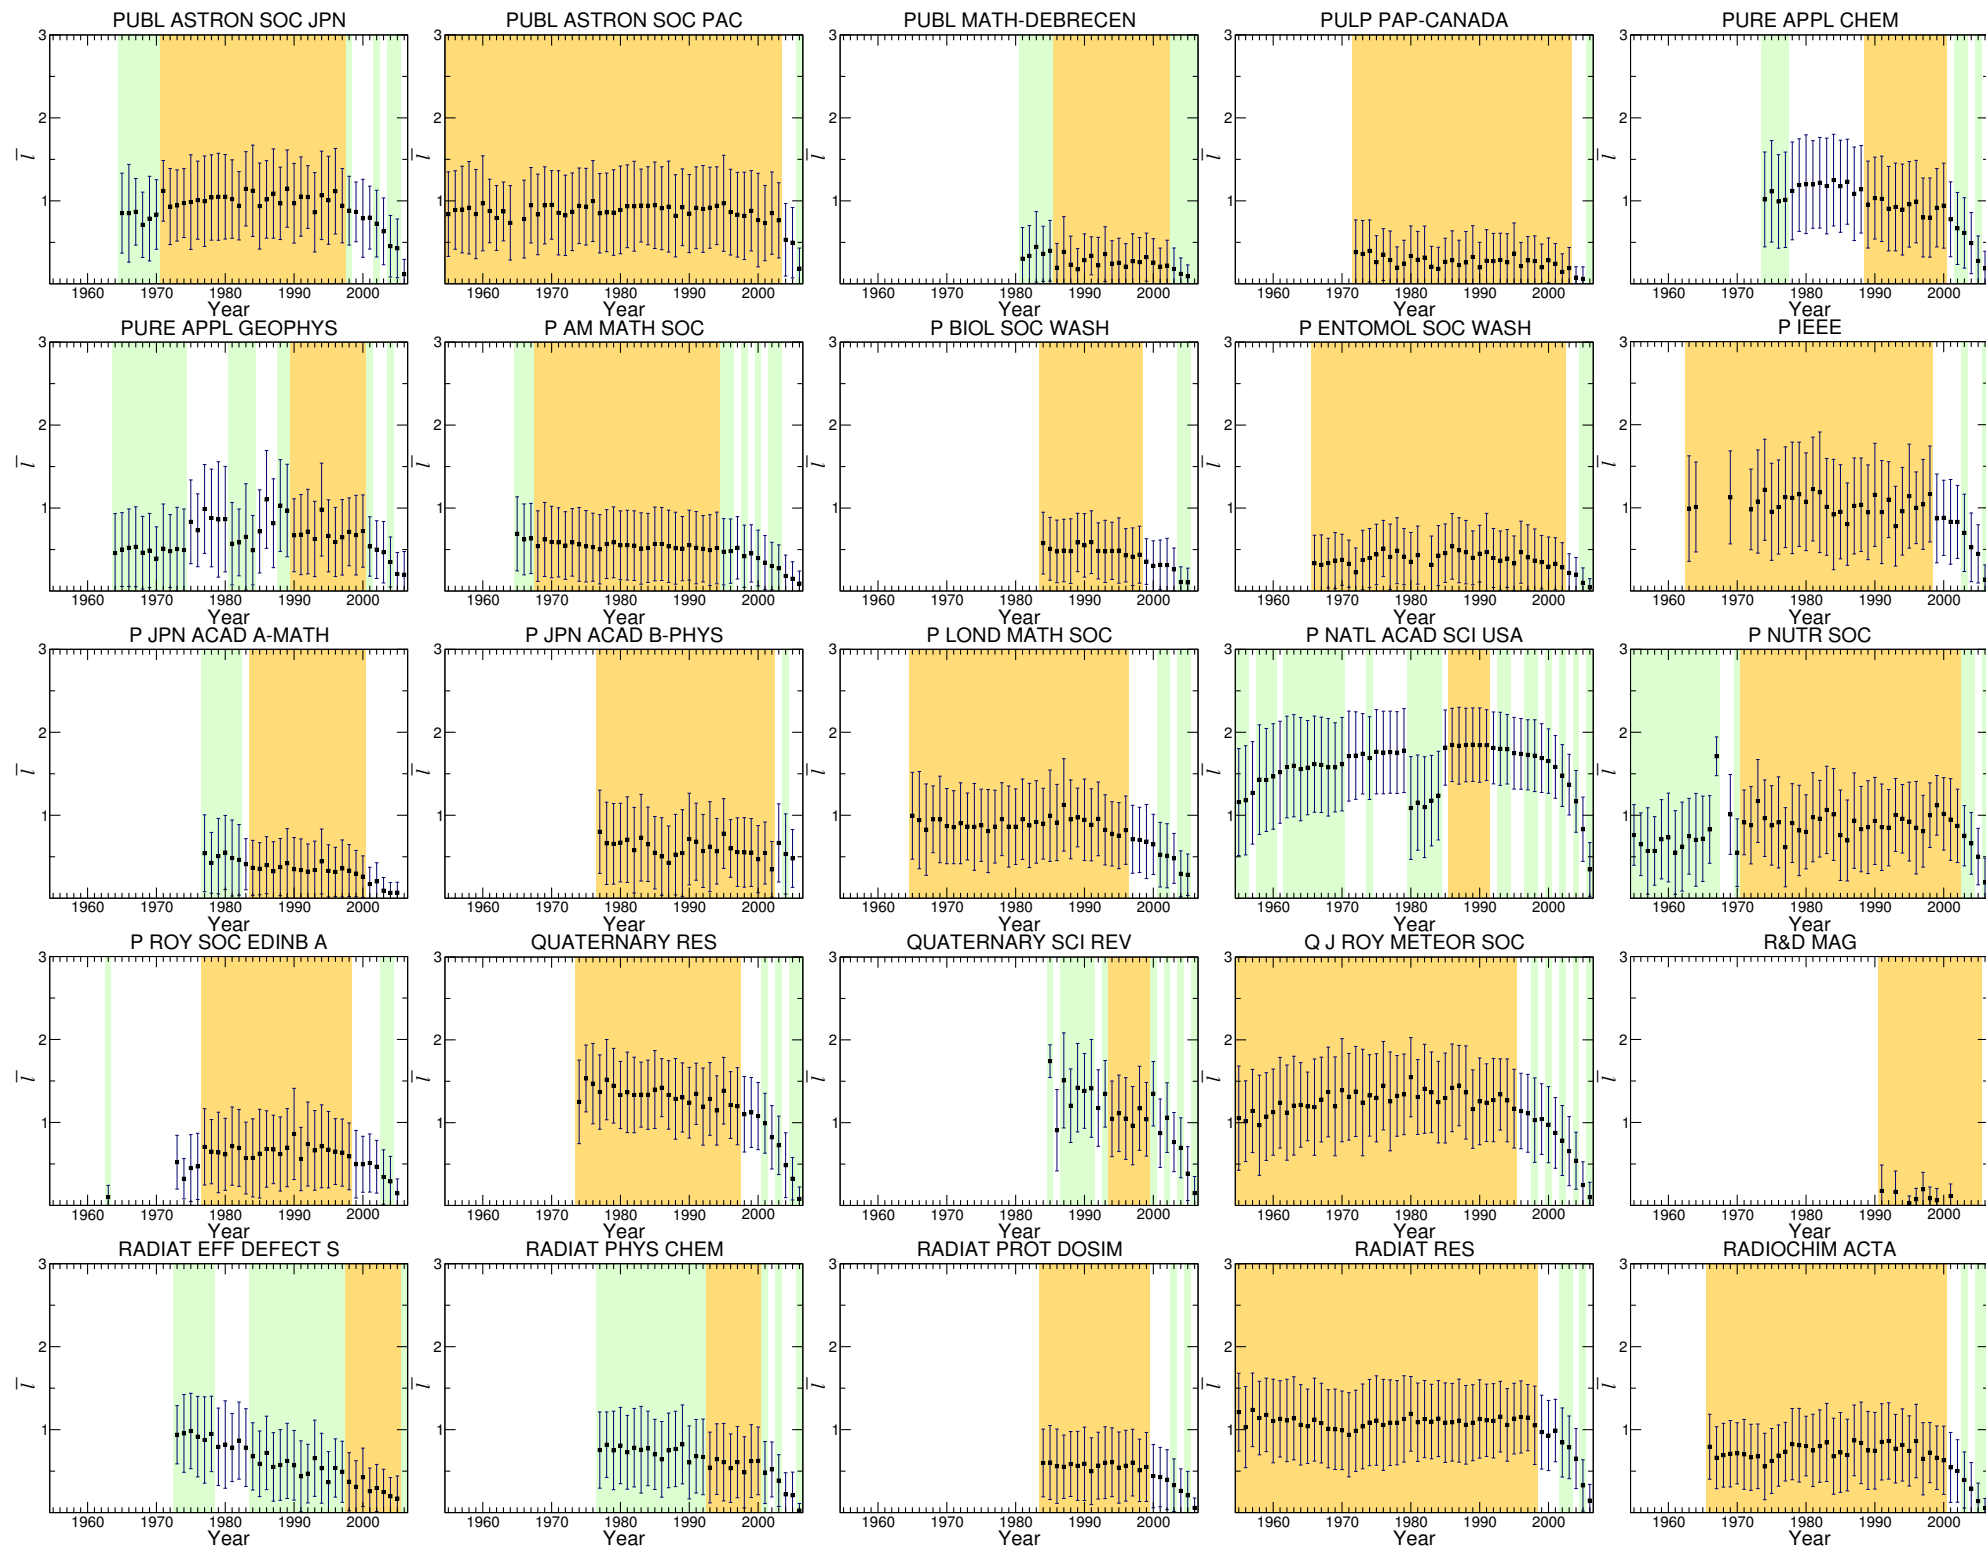

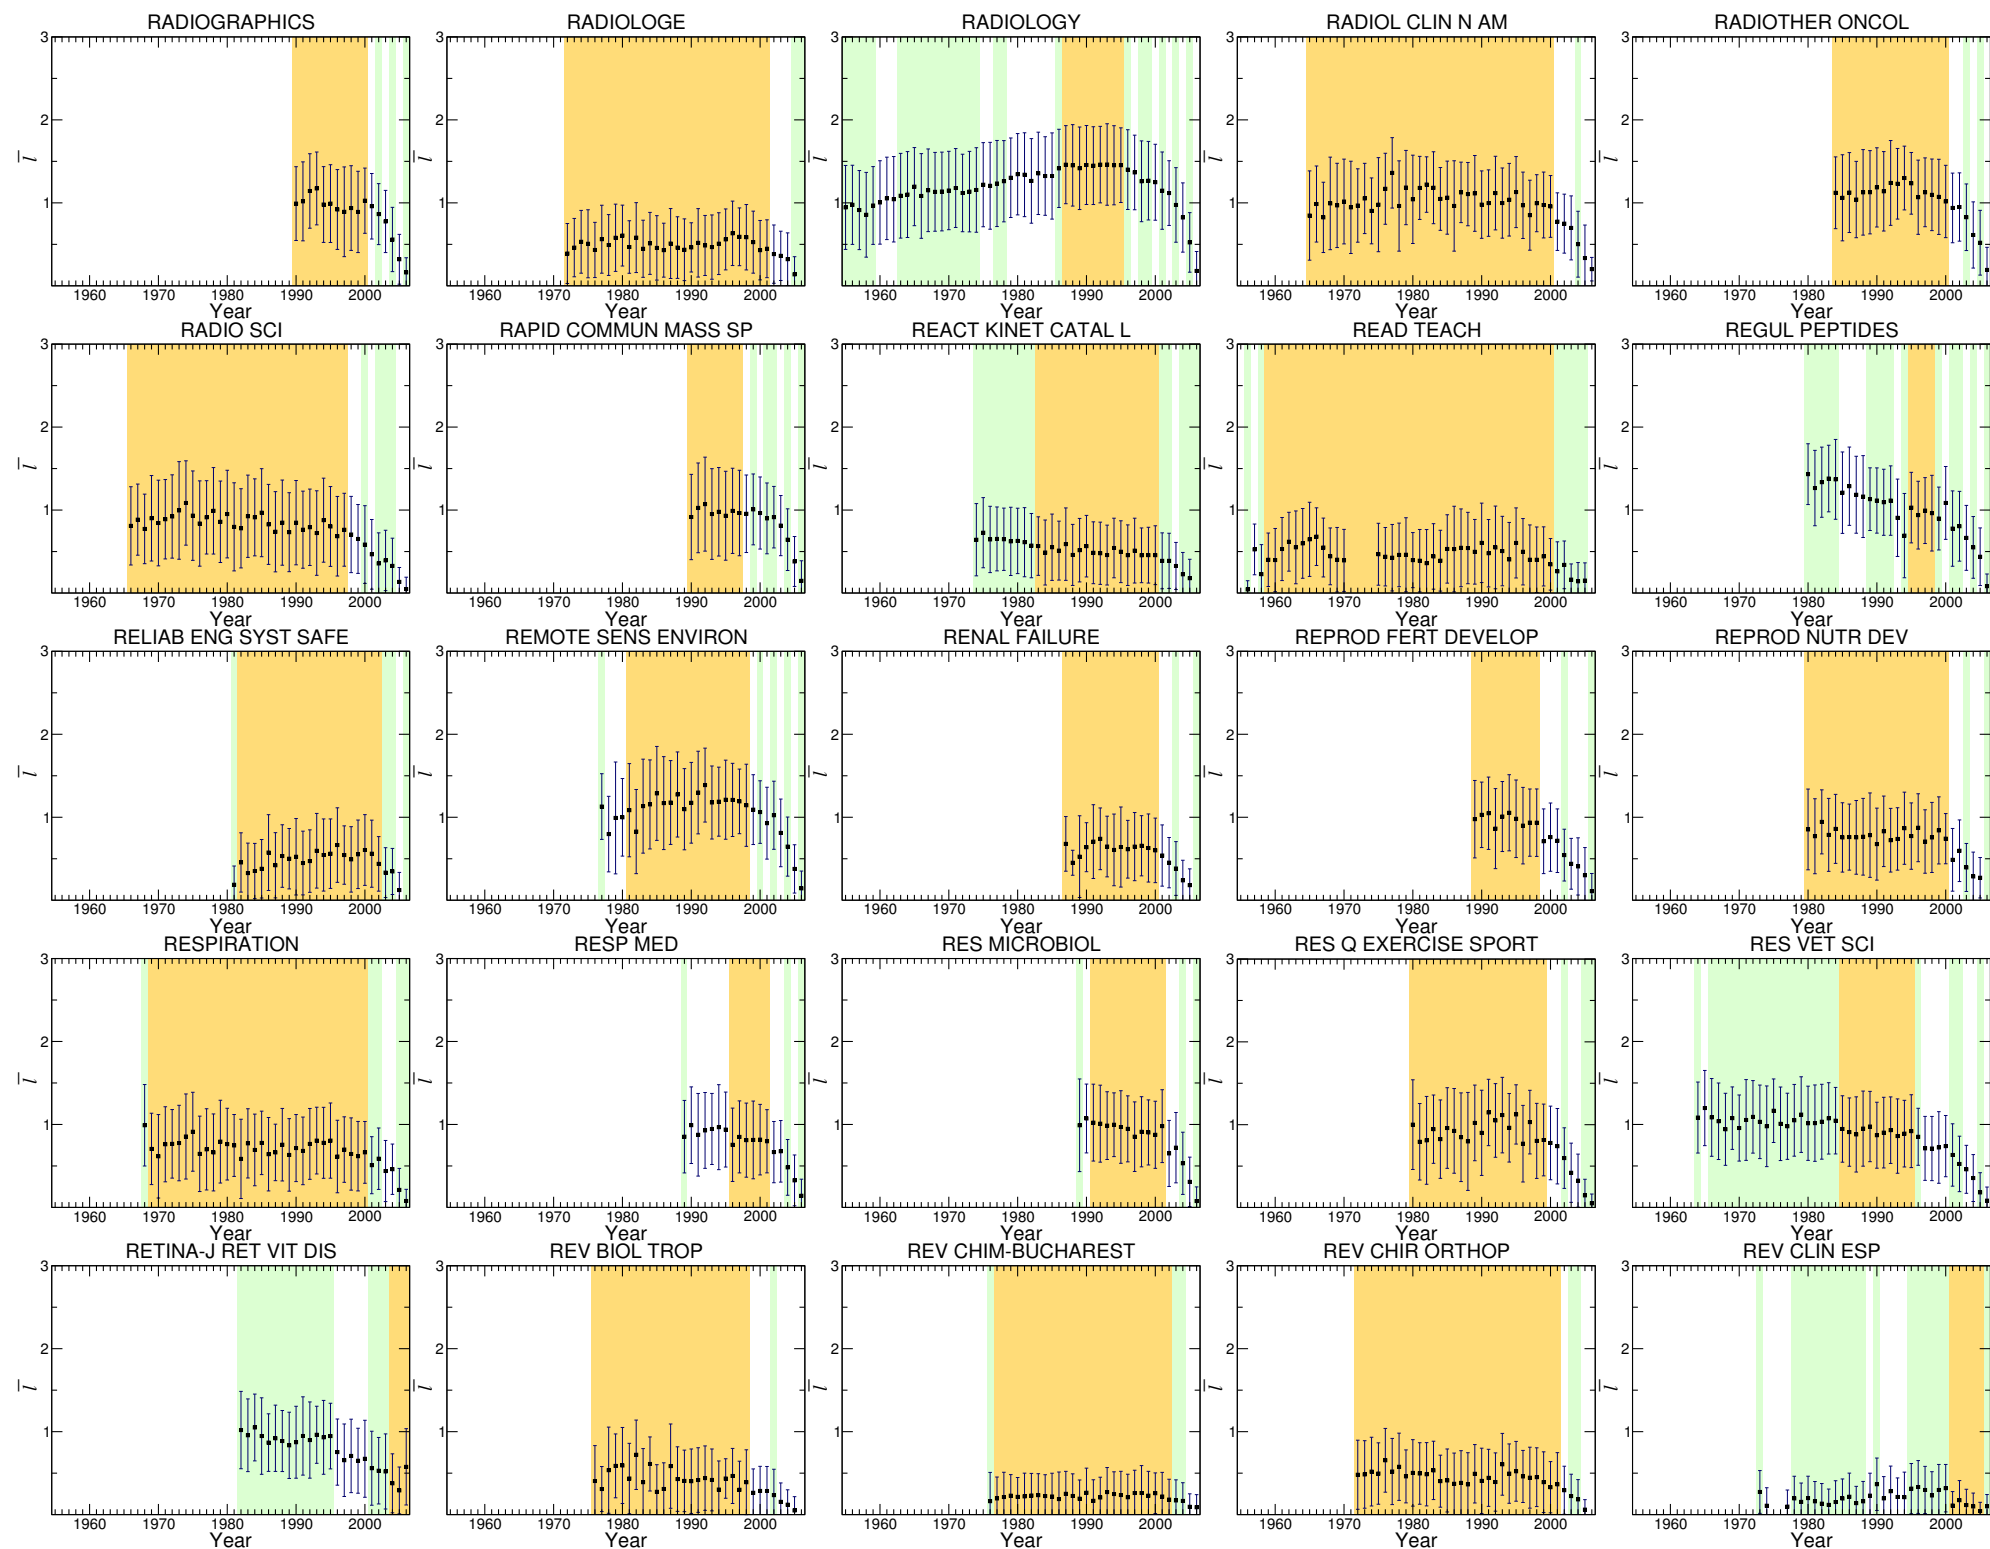

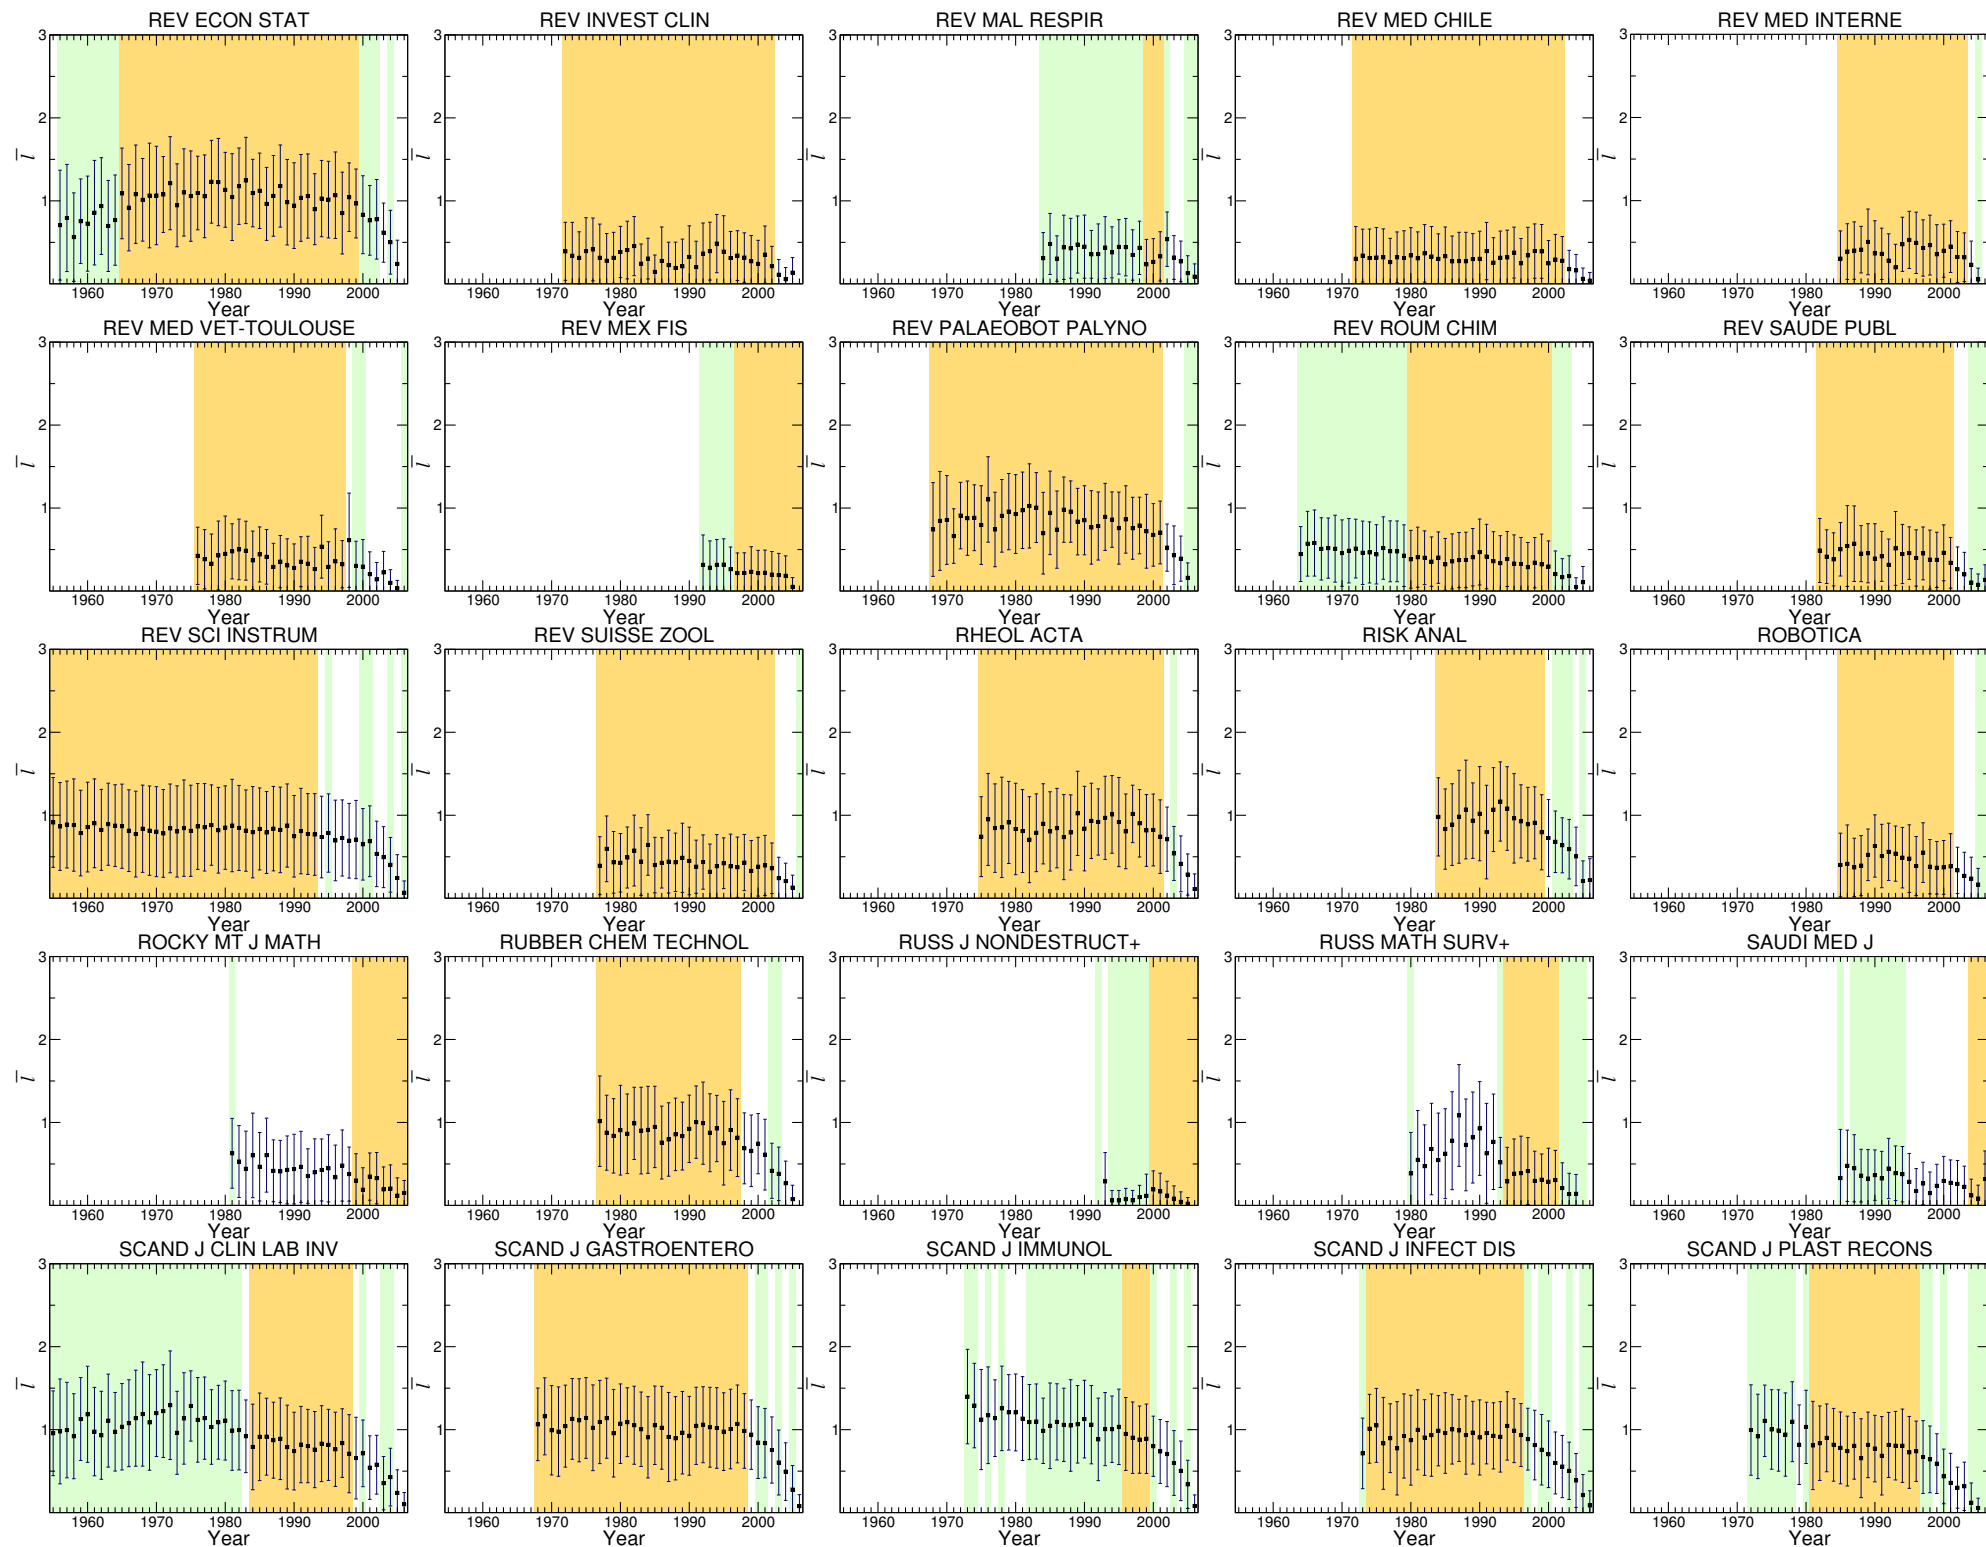

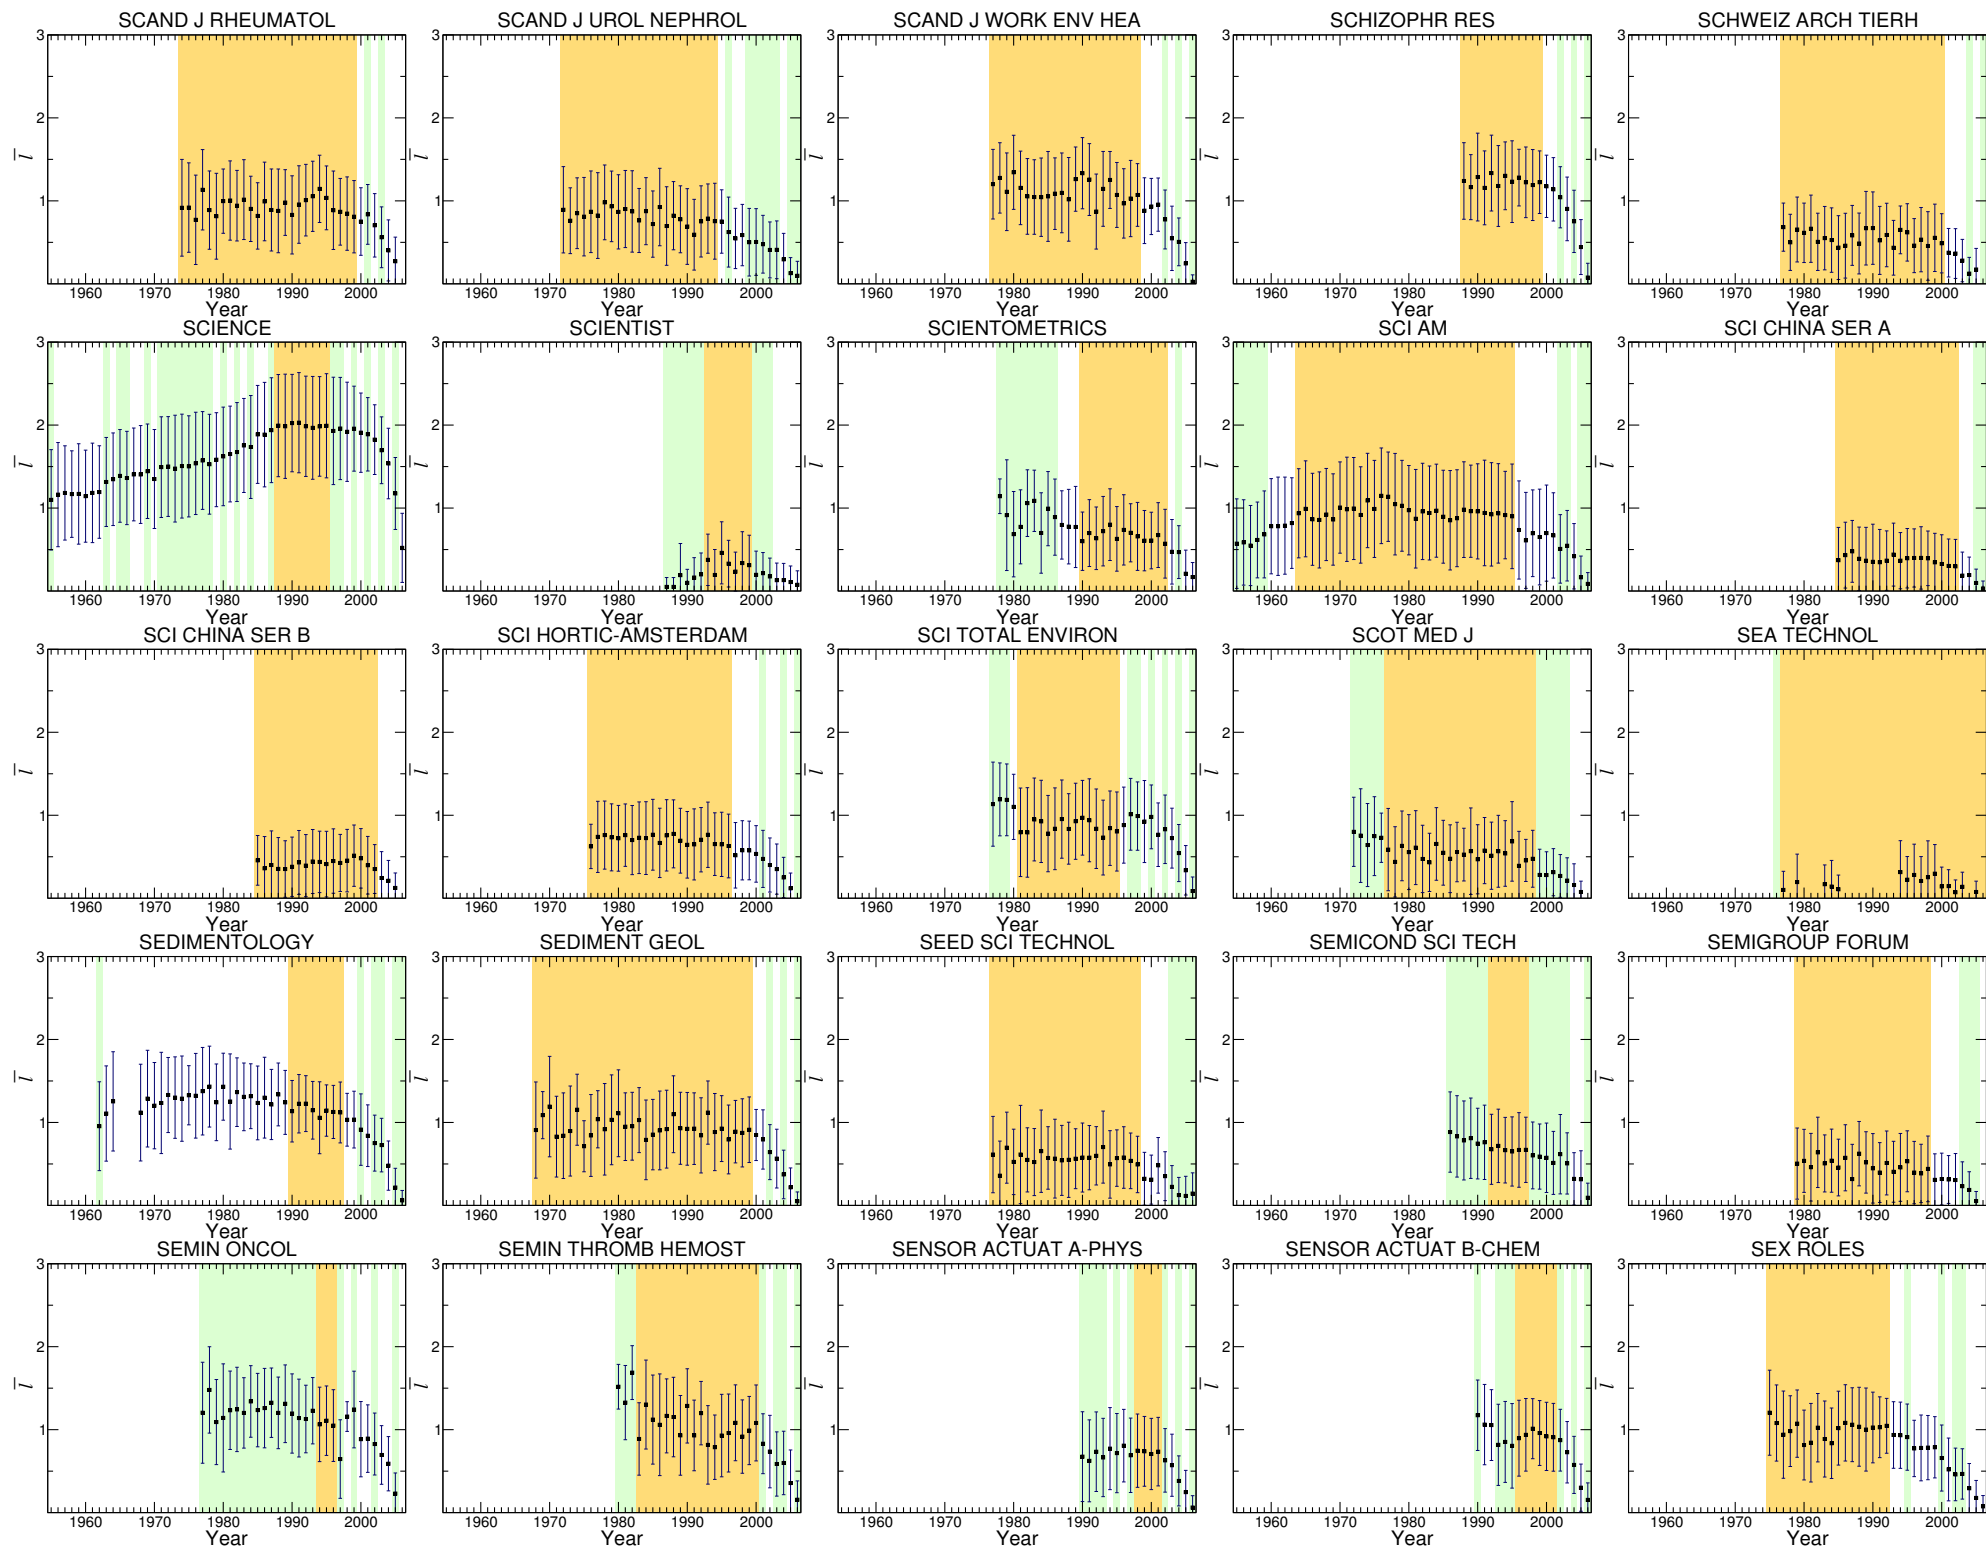

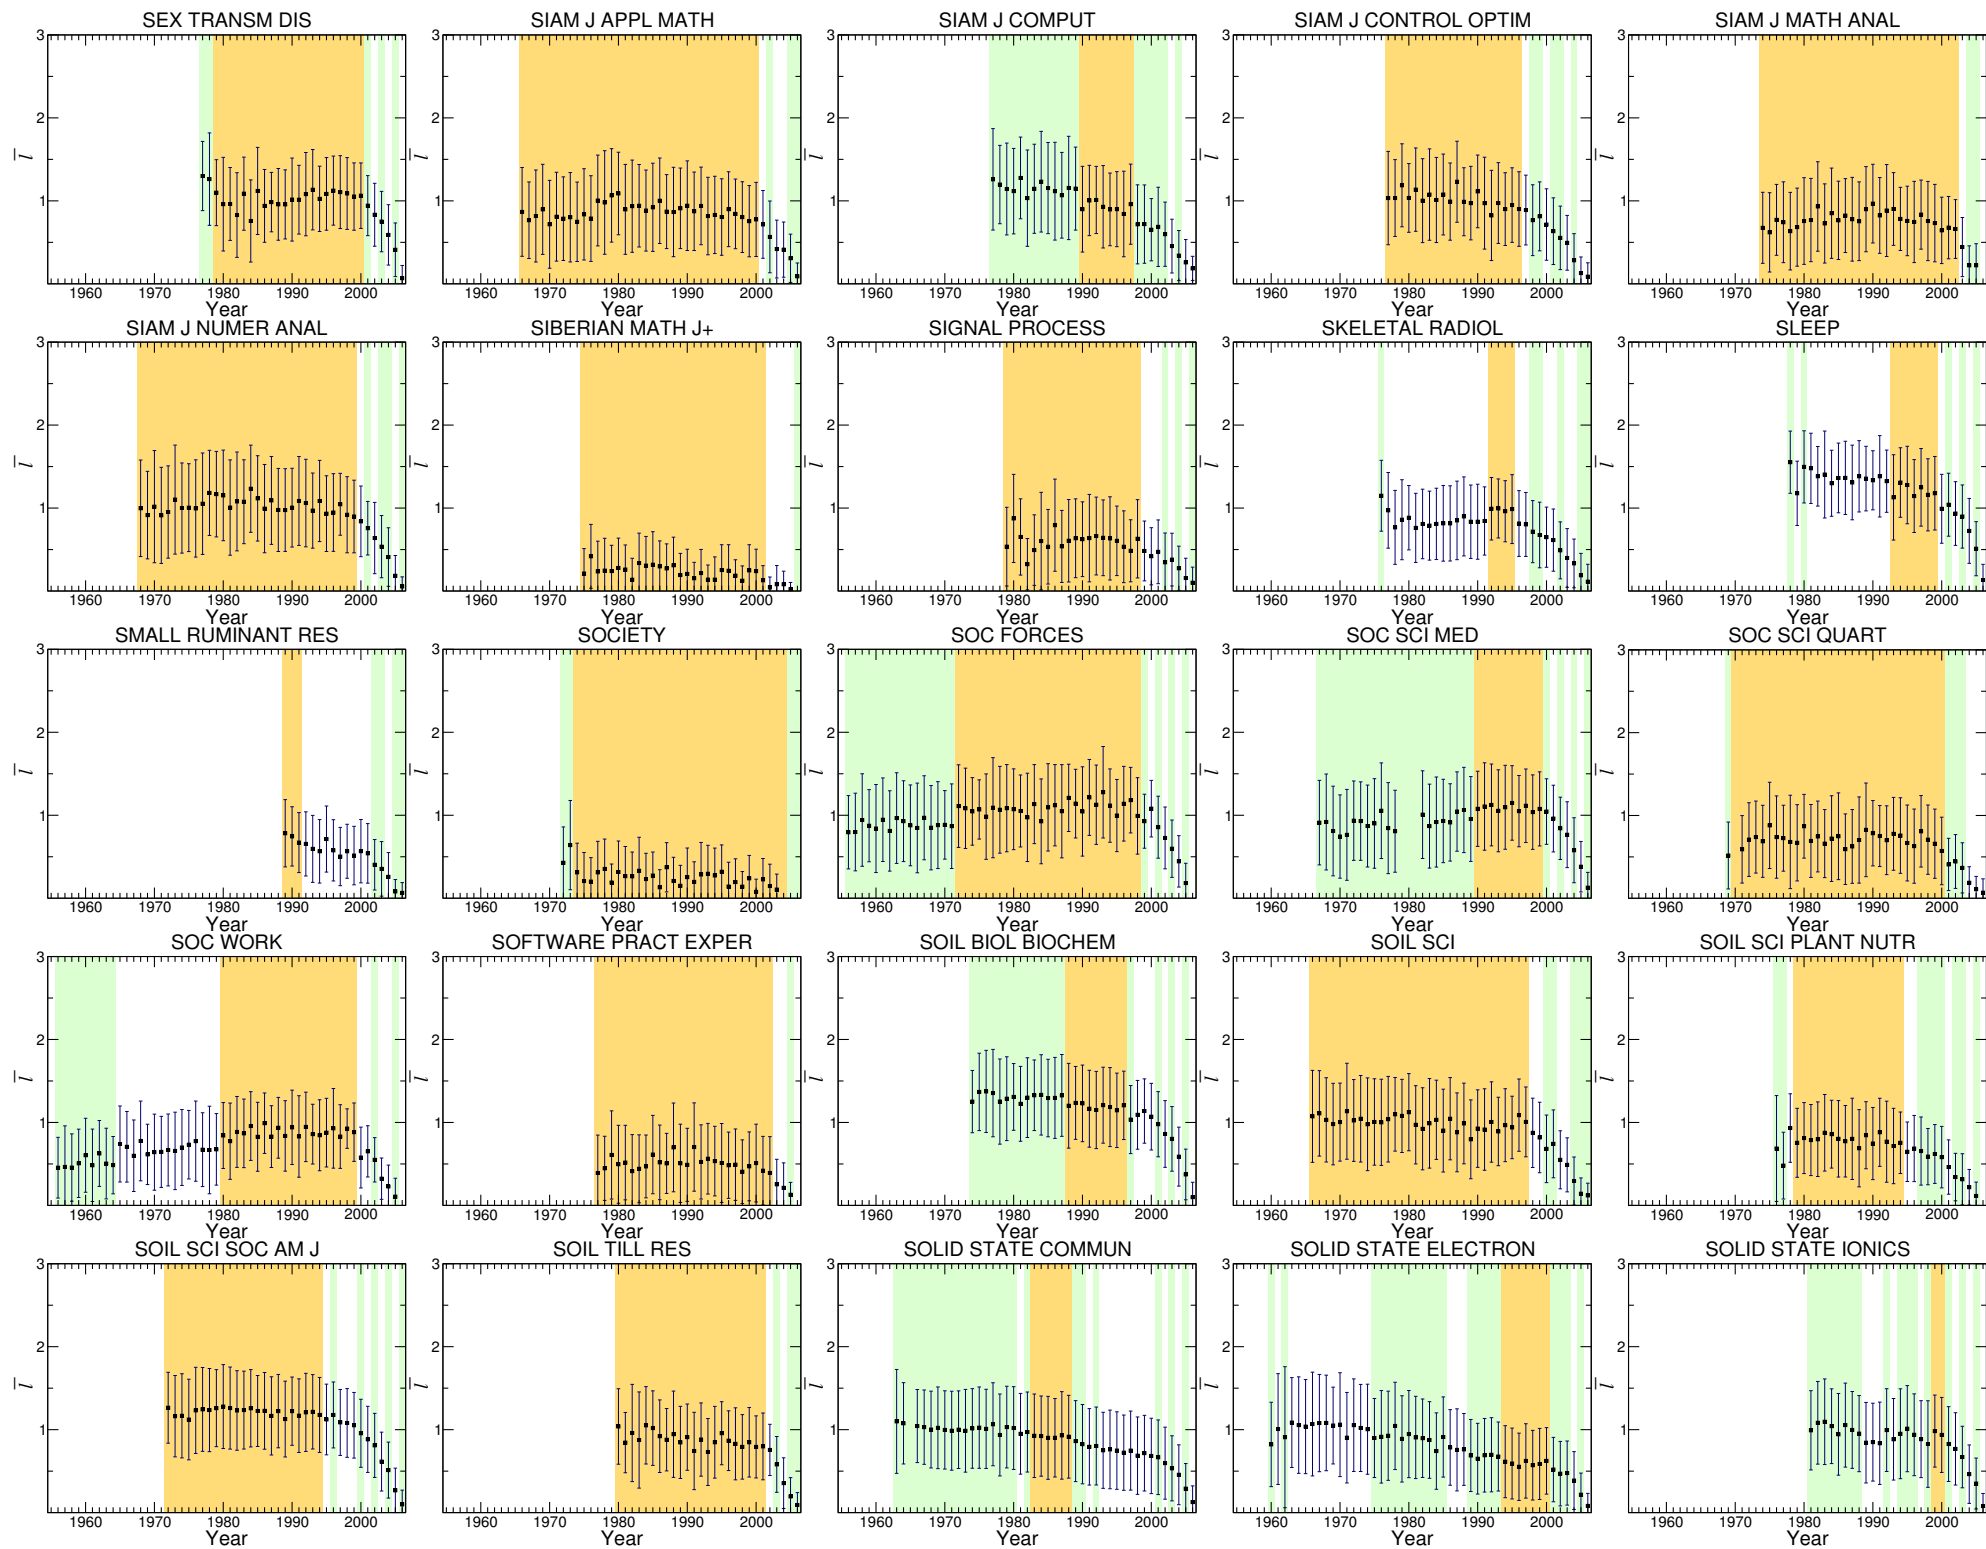



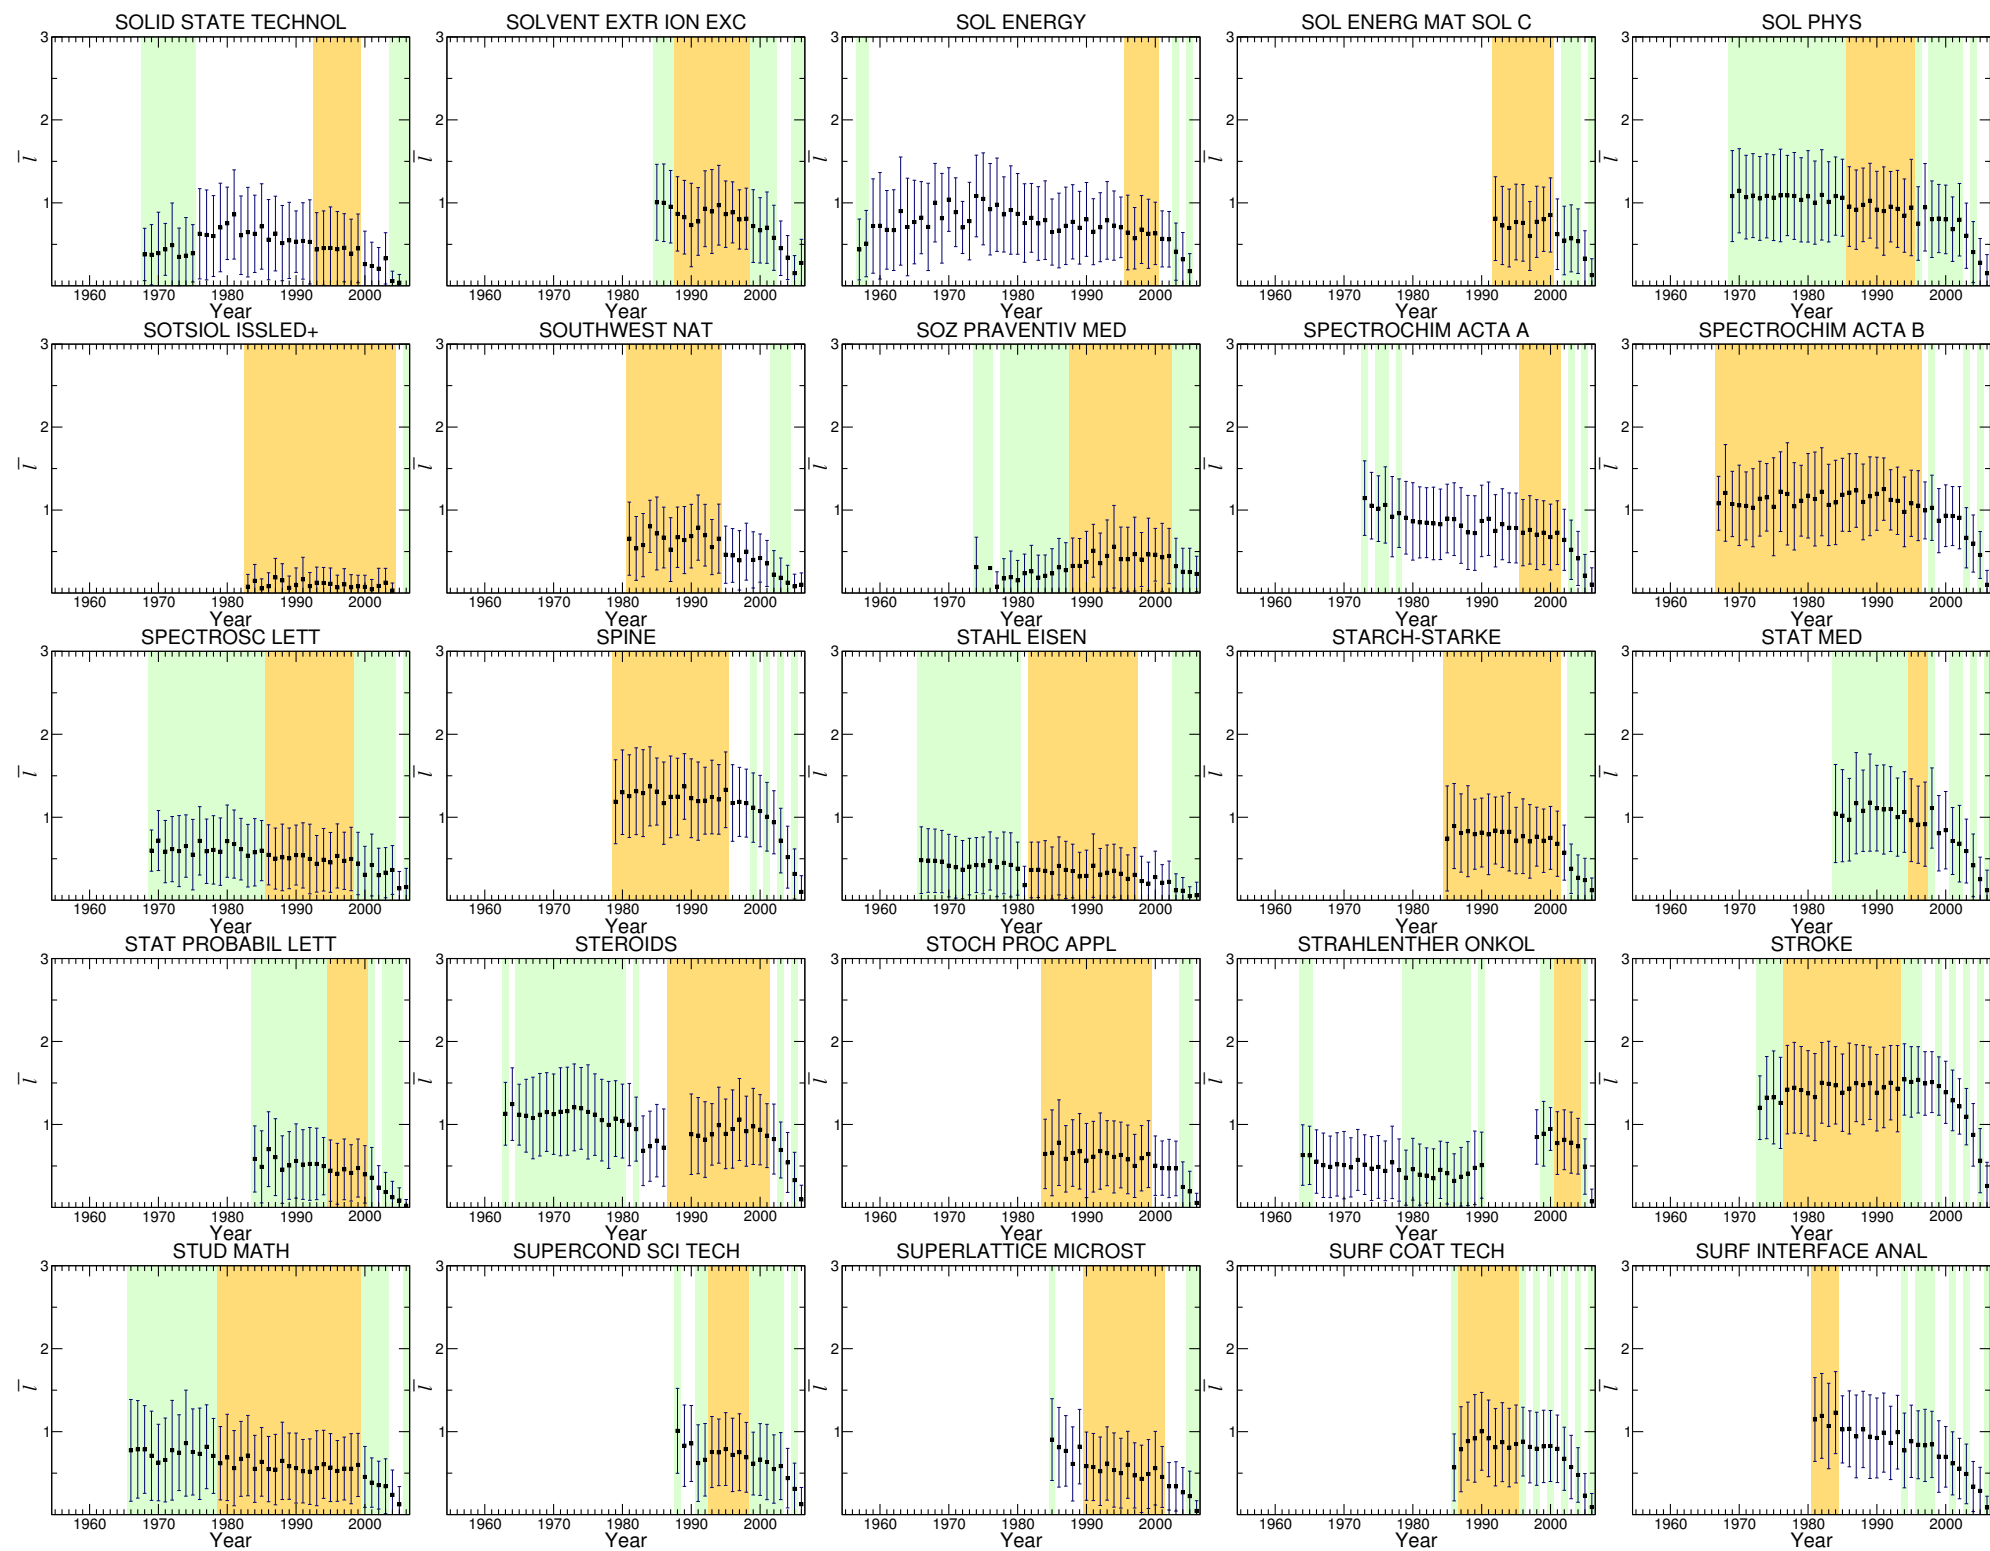

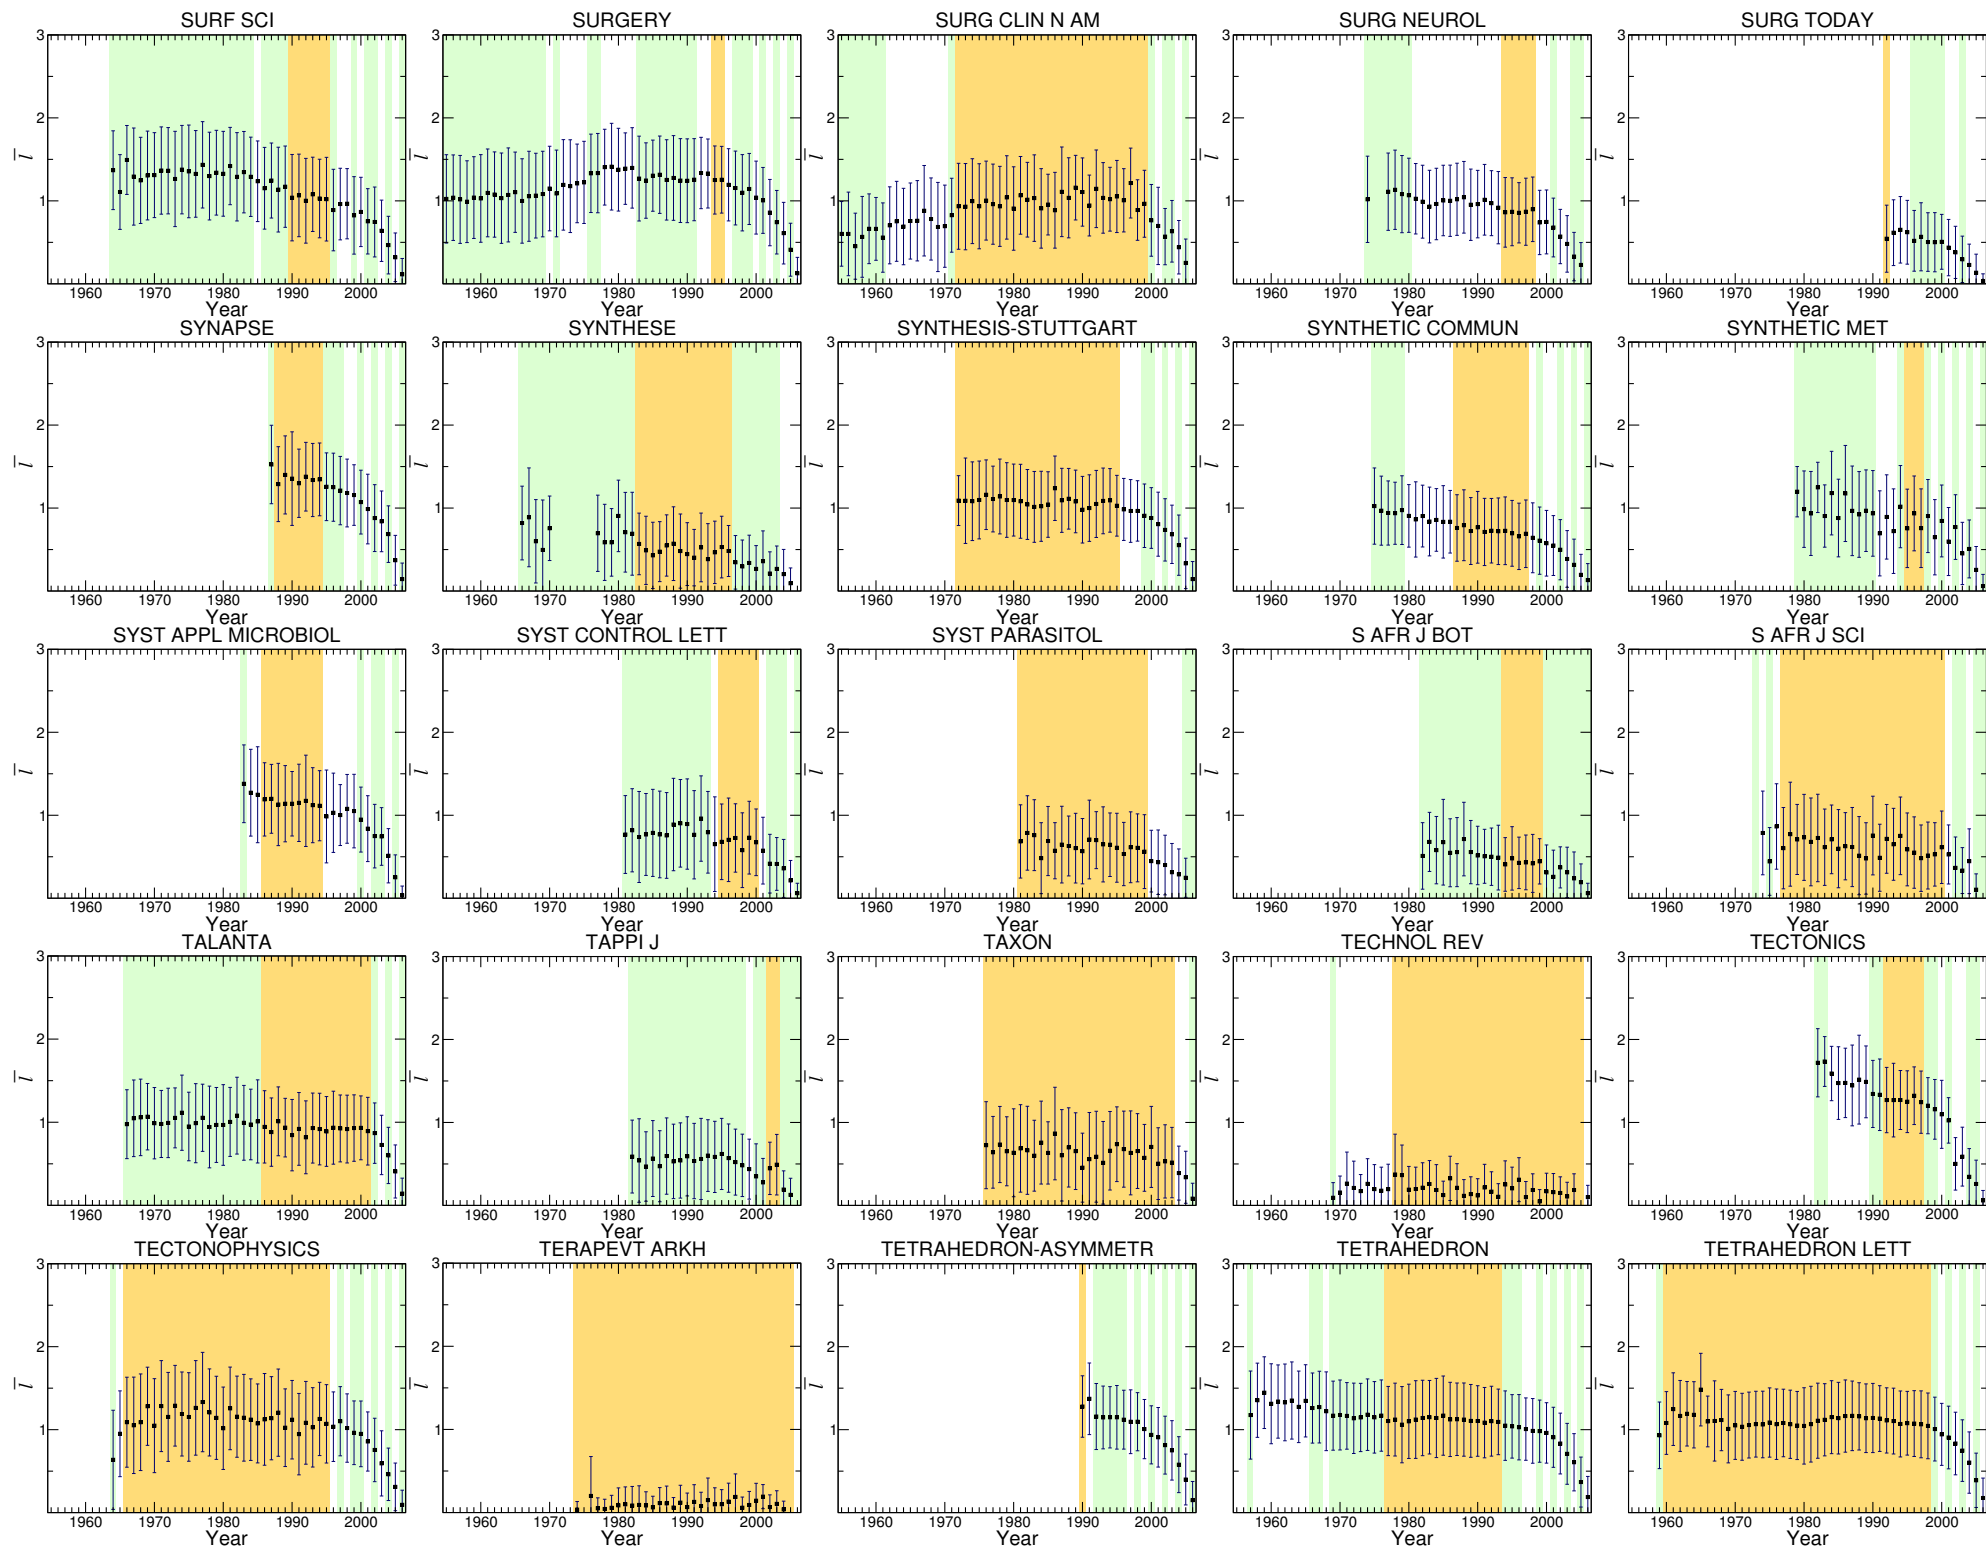

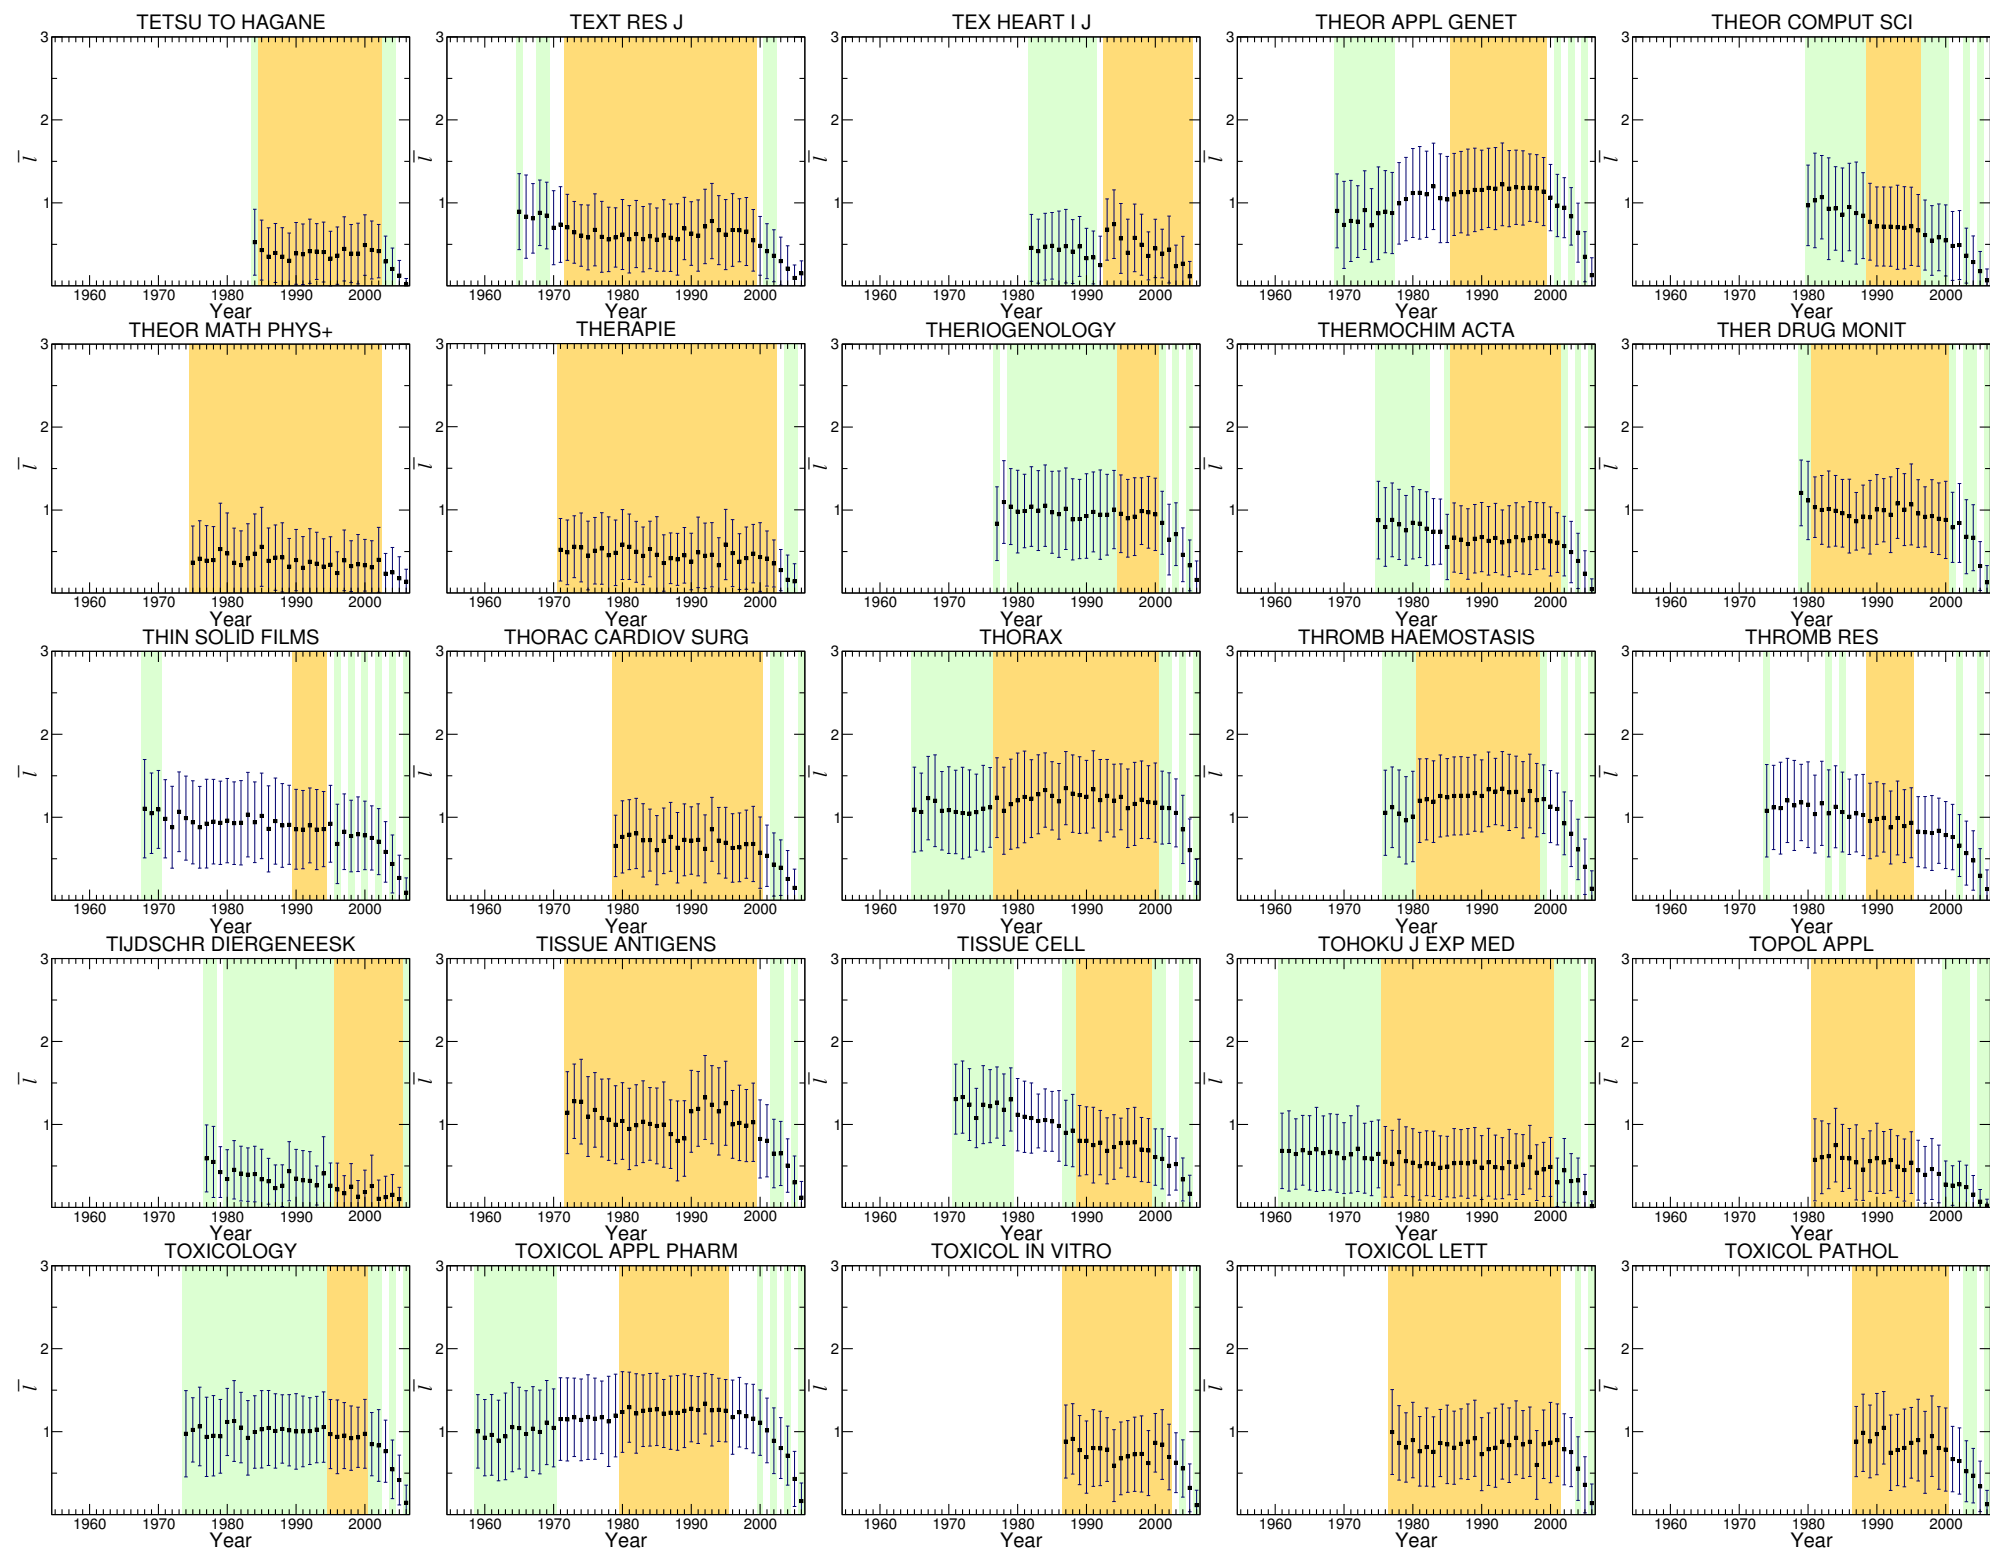

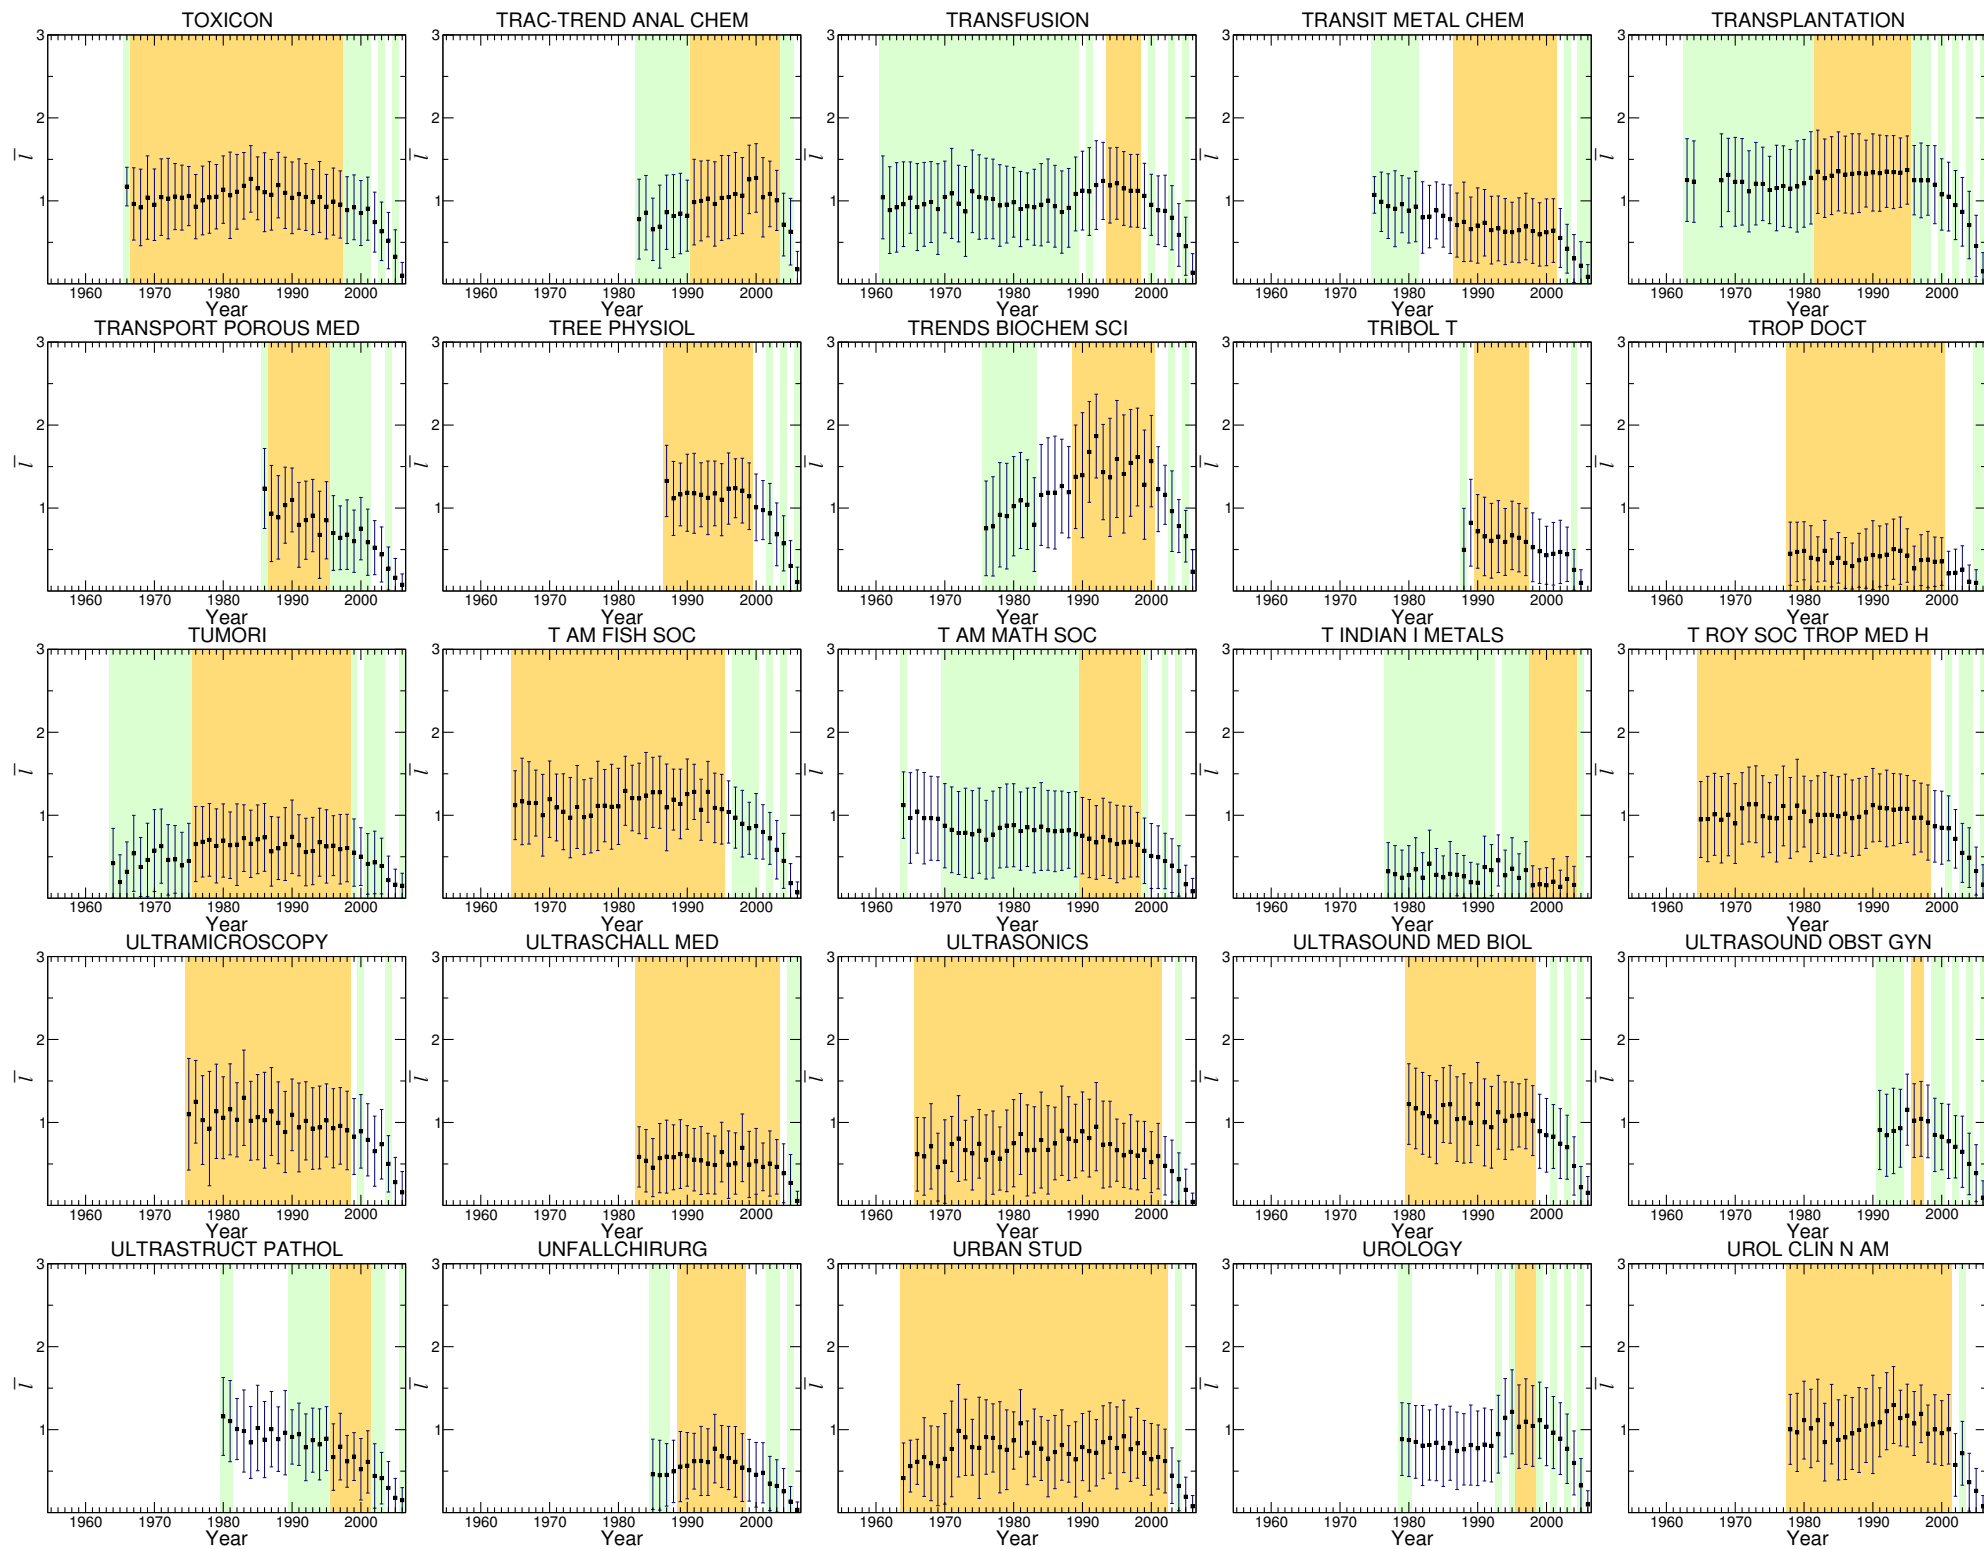

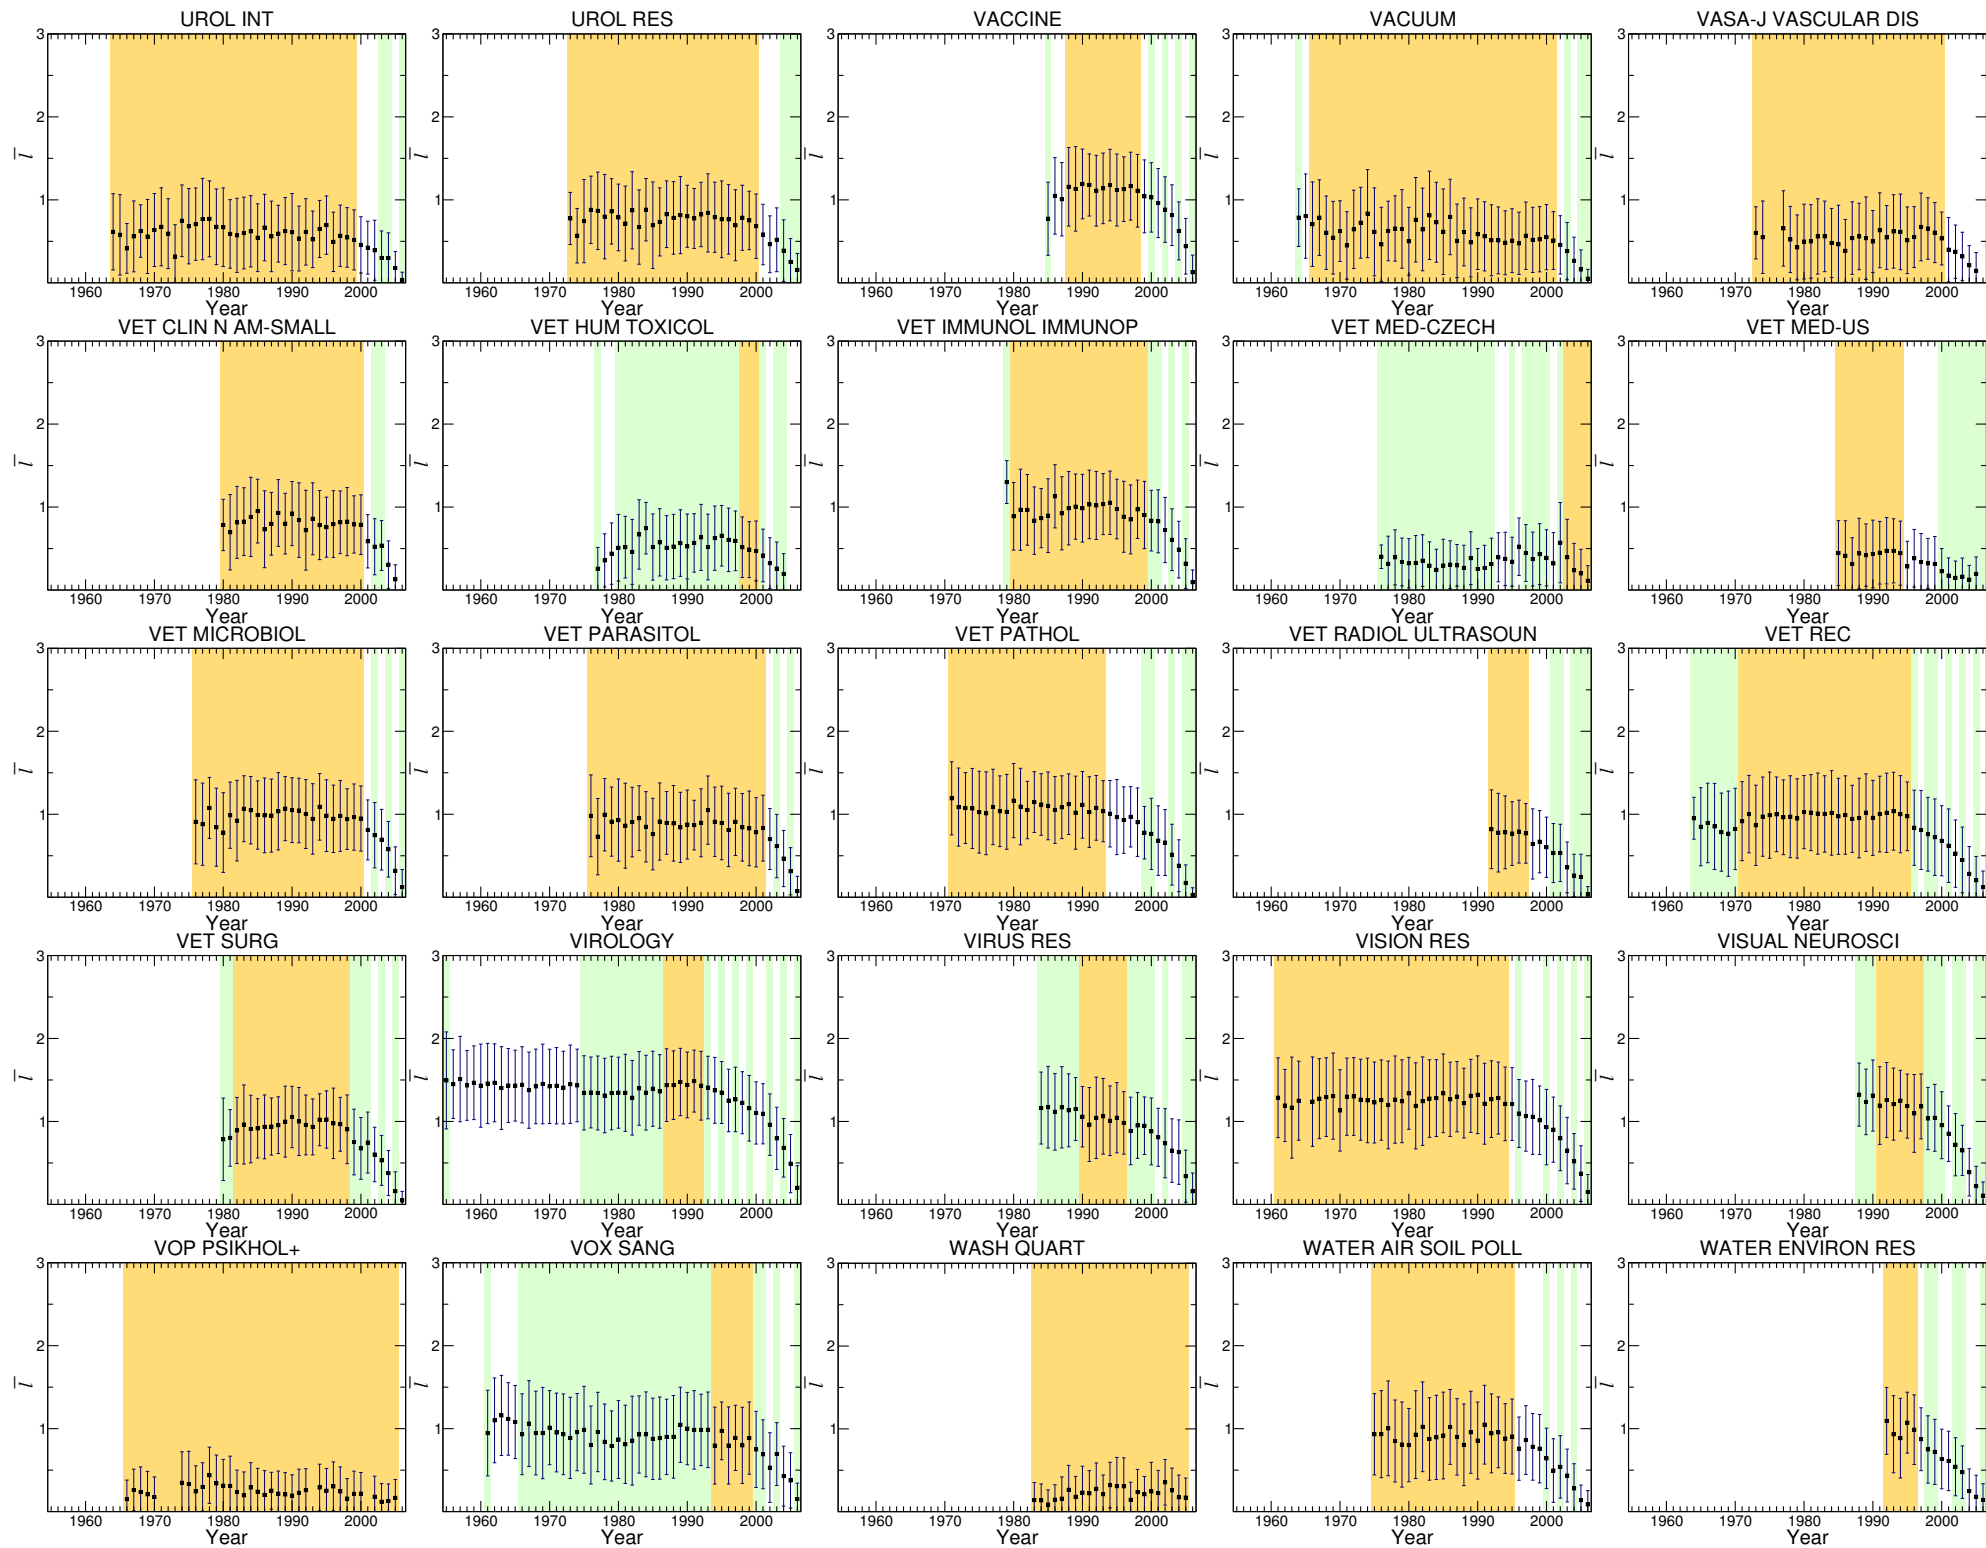

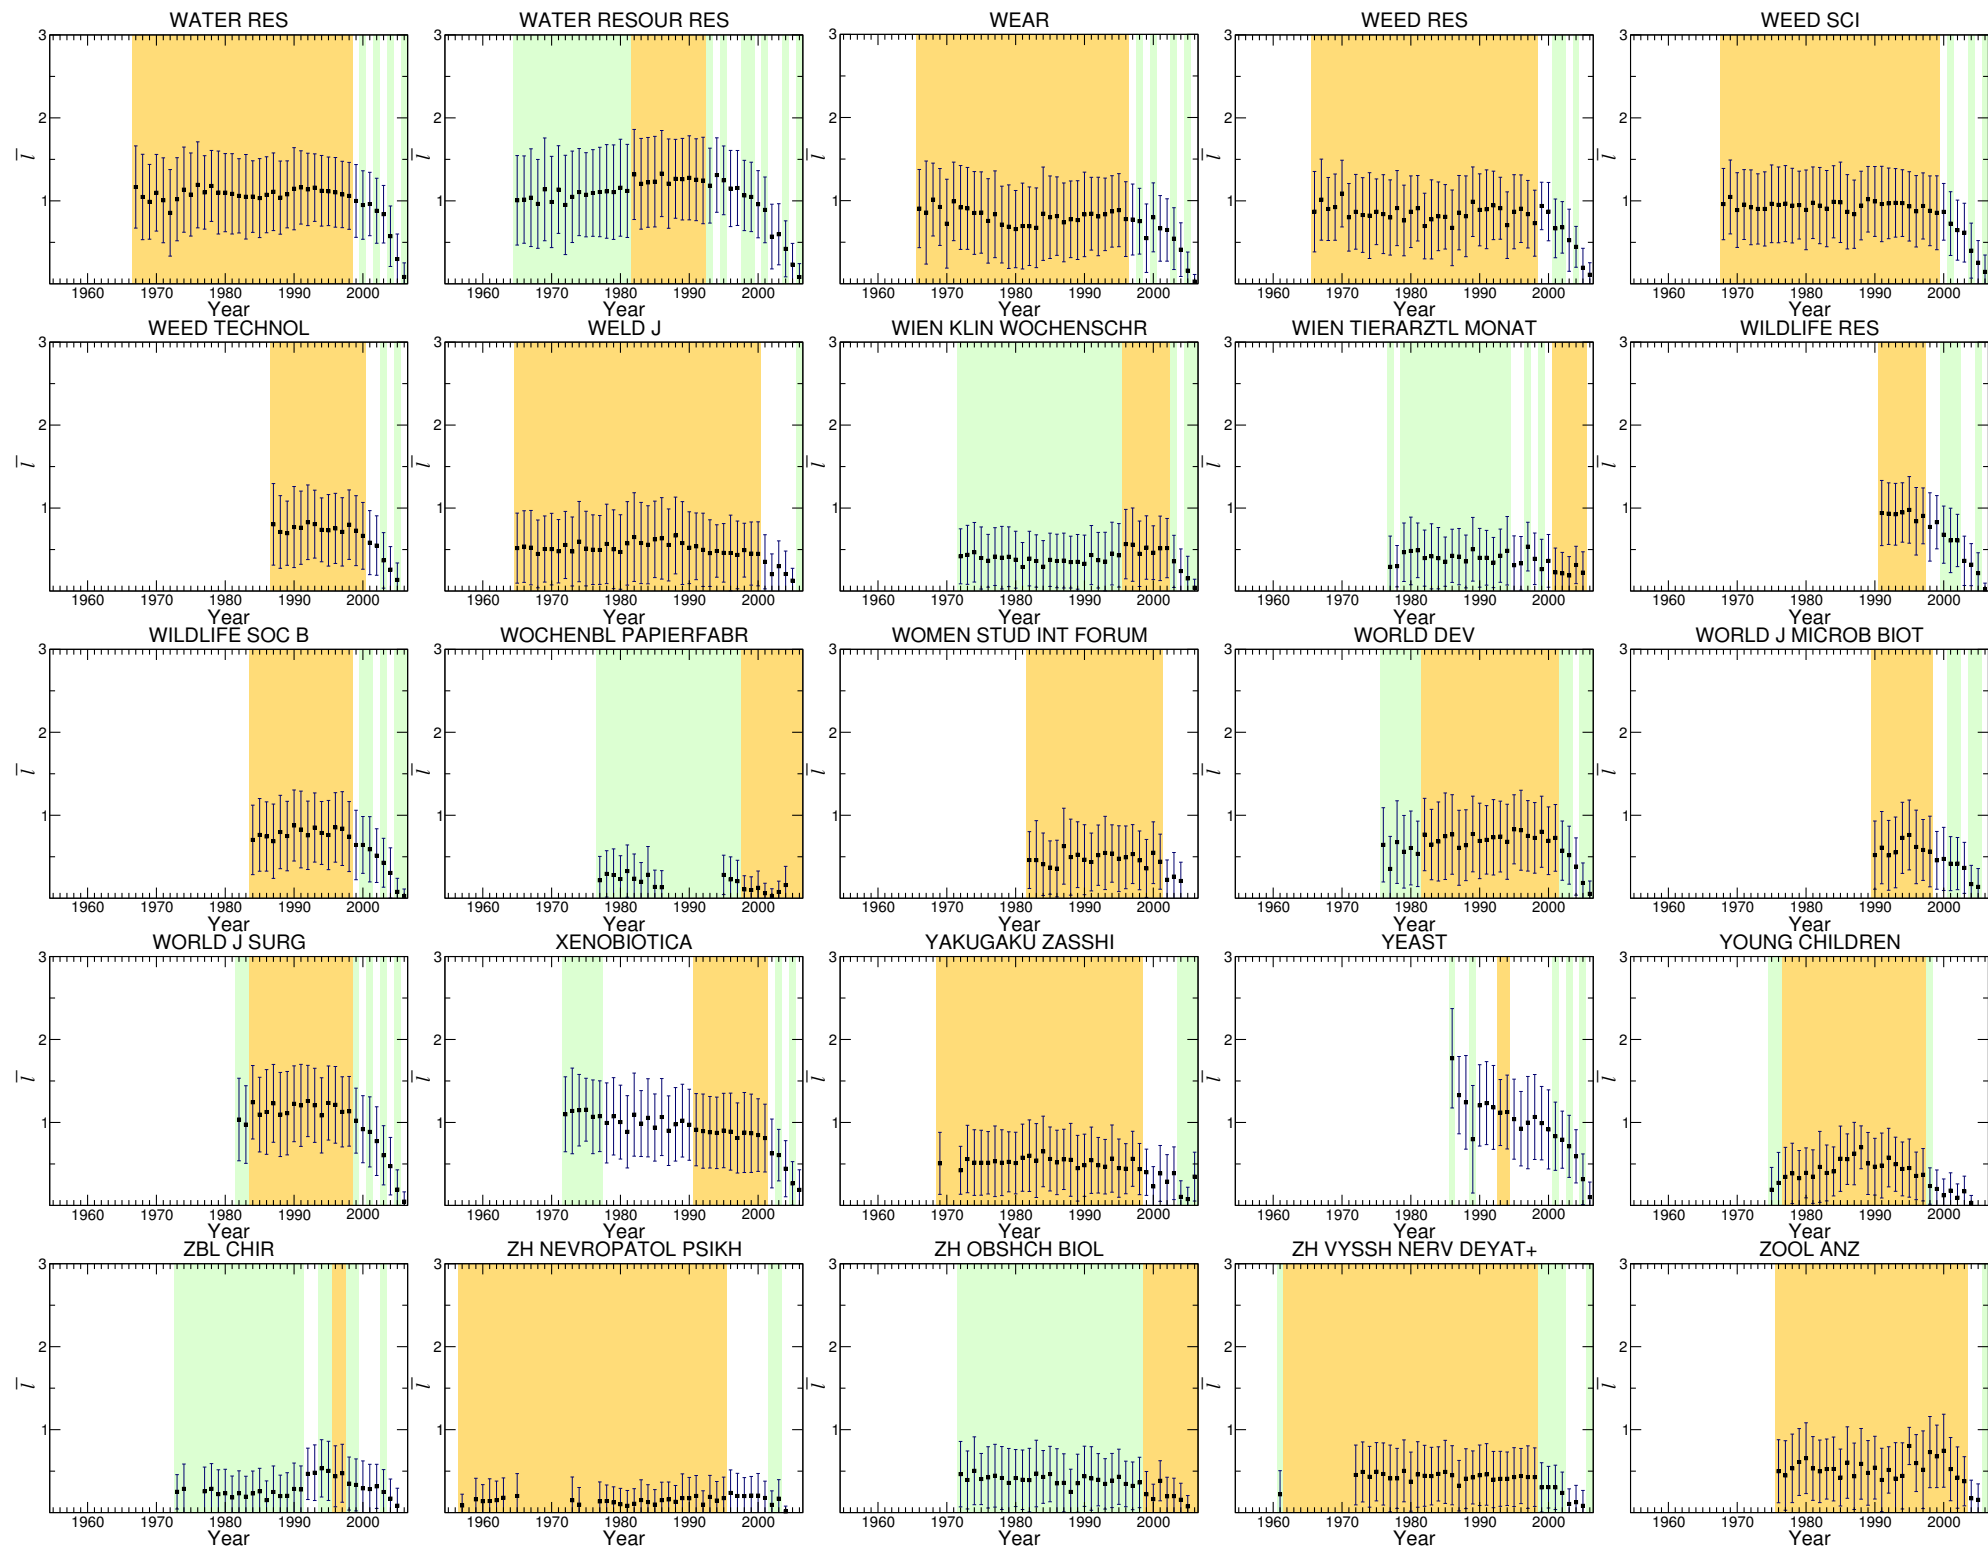

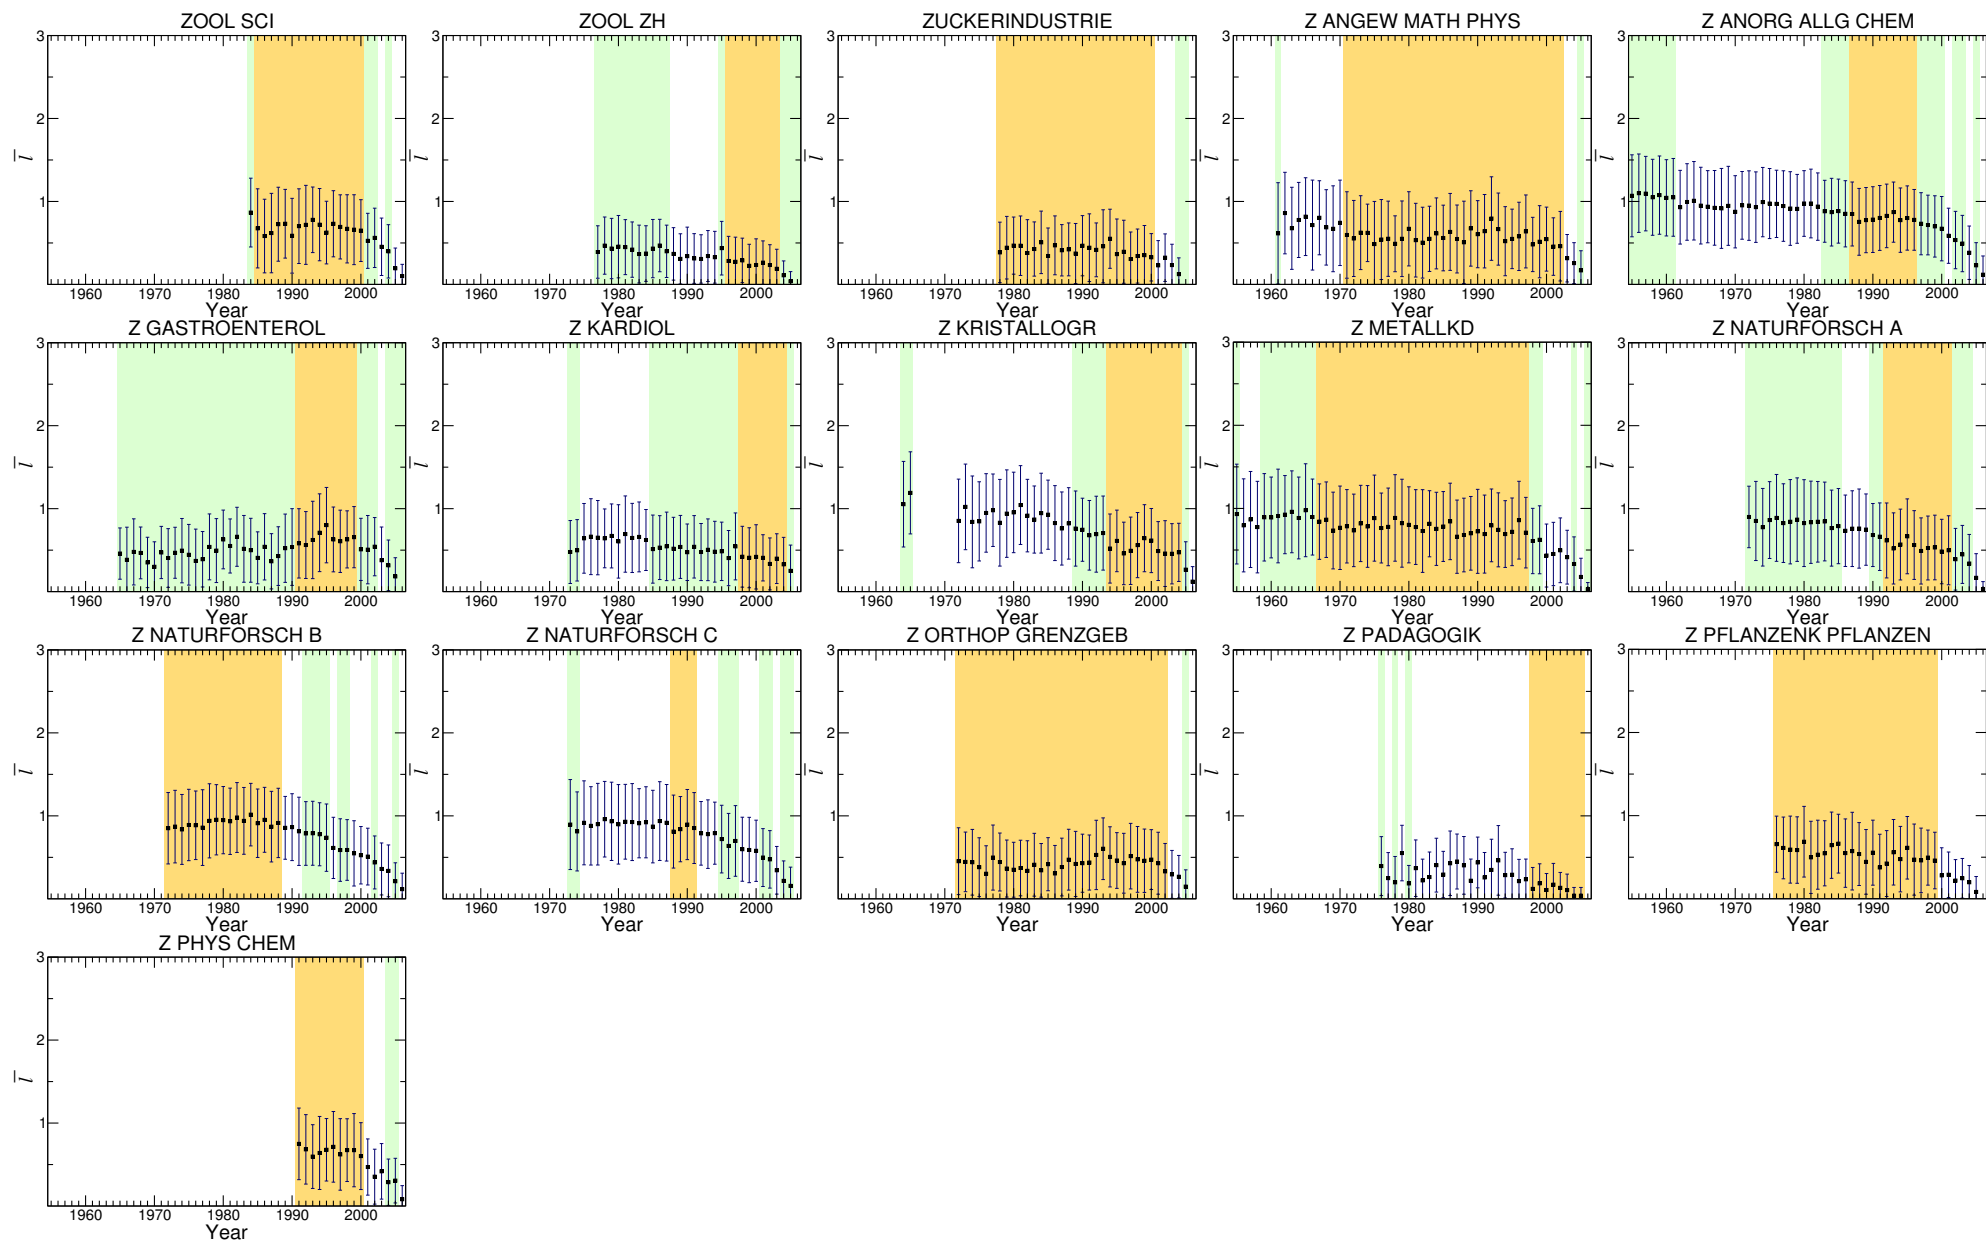

Supplement: S2 (10.1371/journal.pone.0001683.s002) [file journal.pone.0001683.s002]
